# Supplementary material for: Robustness encoded across essential and accessory replicons of the ecologically versatile bacterium Sinorhizobium meliloti
Source: PubMed Central journal article supplement (PMC5929573; doi:10.1371/journal.pgen.1007357), 2018-04-19
Supplement: pgen.1007357.s004.pdf [file pgen.1007357.s004.pdf]

**Table S1.** Tn-seq library coverage.

| Replicate                     | Chromosomal read count * | Chromosomal unique insertion sites † | Median unique insertions per gene |
|-------------------------------|--------------------------|--------------------------------------|-----------------------------------|
| Wild-type - rich - 1          | 8077681                  | 186102                               | 38                                |
| Wild-type - rich - 2          | 6606632                  | 189284                               | 39                                |
| Wild-type - defined - 1       | 4808590                  | 177099                               | 37                                |
| Wild-type - defined - 2       | 5048400                  | 181586                               | 38                                |
| $\Delta$ pSymAB - rich - 1    | 16868958                 | 196280                               | 41                                |
| $\Delta$ pSymAB - rich - 2    | 14008712                 | 188947                               | 40                                |
| $\Delta$ pSymAB - defined - 1 | 11241306                 | 199391                               | 40                                |
| $\Delta$ pSymAB - defined - 2 | 10193372                 | 200918                               | 41                                |

\* The lower read count for the wild-type samples compared to the  $\Delta$ pSymAB samples is predominately due to a significant portion of the reads mapping to the pSymA and pSymB replicons.

† The similarities in the number of unique insertion sites across replicates suggests that the libraries are of equal quality, and that differences in the level of saturation are not likely to explain differences between treatments.
