# Supplementary material for: Robustness encoded across essential and accessory replicons of the ecologically versatile bacterium Sinorhizobium meliloti
Source: PubMed Central journal article supplement (PMC5929573; doi:10.1371/journal.pgen.1007357), 2018-04-19
Supplement: pgen.1007357.s005.pdf [file pgen.1007357.s005.pdf]

**Table S2.** Generation times\* (hours) of *S. meliloti* strains.

| Genotype †      | Rich medium |         | Defined medium |         |
|-----------------|-------------|---------|----------------|---------|
|                 | RmP3499     | RmP3496 | RmP3499        | RmP3496 |
| No mutation     | 2.00        | 4.19    | 2.47           | 3.80    |
| <i>rhaK</i> ‡   | 2.01        | 4.22    | 2.78           | 3.52    |
| <i>feuQ</i>     | 2.06        | 2.95    | 2.77           | 3.42    |
| <i>coaA</i>     | 1.95        | 4.21    | 3.00           | 3.93    |
| <i>tig</i>      | 2.01        | 4.47    | 3.09           | 4.04    |
| <i>smc00074</i> | 1.97        | 4.16    | 3.01           | 3.62    |
| <i>ppk</i>      | 1.94        | 4.57    | 2.92           | 5.10    |
| <i>smc00712</i> | 1.91        | 3.93    | 2.91           | 3.56    |
| <i>cbrA</i>     | 2.11        | 8.75    | 3.52           | 6.23    |

\* Generation times are calculated from the average of triplicate samples, and are shown in hours.

† The gene disrupted in each strain is indicated in the left column. The background strain that the mutation was constructed in is shown along the top.

‡ The *rhaK* mutant strains are meant as control strains as mutation of this gene is expected to have no phenotype under the tested conditions.
