# Supplementary material for: Robustness encoded across essential and accessory replicons of the ecologically versatile bacterium Sinorhizobium meliloti
Source: PubMed Central journal article supplement (PMC5929573; doi:10.1371/journal.pgen.1007357), 2018-04-19
Supplement: pgen.1007357.s006.pdf [file pgen.1007357.s006.pdf]

**Table S3. Core model (iGD726) biomass composition.**

| Component                             | Percent dry mass | Composition - %                                                                                                                                                                                                                                                                                                                                                                                                                                                                                                                                                                                                                                                                                                                                                                |
|---------------------------------------|------------------|--------------------------------------------------------------------------------------------------------------------------------------------------------------------------------------------------------------------------------------------------------------------------------------------------------------------------------------------------------------------------------------------------------------------------------------------------------------------------------------------------------------------------------------------------------------------------------------------------------------------------------------------------------------------------------------------------------------------------------------------------------------------------------|
| DNA <sup>a</sup>                      | 2.8              | Guanine - 31.05<br>Cytosine - 31.05<br>Adenine - 18.95<br>Thymine - 18.95                                                                                                                                                                                                                                                                                                                                                                                                                                                                                                                                                                                                                                                                                                      |
| RNA <sup>b</sup>                      | 7.1              | Guanine - 28.09<br>Cytosine - 28.09<br>Adenine - 21.91<br>Uracil - 21.91                                                                                                                                                                                                                                                                                                                                                                                                                                                                                                                                                                                                                                                                                                       |
| Protein <sup>c</sup>                  | 49.3             | Lysine - 3.20<br>Alanine - 12.01<br>Leucine 10.19<br>Phenylalanine - 3.94<br>Arginine 7.33<br>Glutamine - 2.90<br>Glycine - 8.46<br>Methionine - 2.44<br>Valine - 7.58<br>Proline - 5.03<br>Tyrosine - 2.29<br>Aspartate - 5.31<br>Glutamate - 5.84<br>Histidine - 2.11<br>Threonine - 5.15<br>Cysteine - 0.93<br>Isoleucine - 5.48<br>Tryptophan - 1.38<br>Asparagine - 2.64<br>Serine - 5.80                                                                                                                                                                                                                                                                                                                                                                                 |
| Phosphatidylglycerol <sup>d</sup>     | 1.001            | Phosphatidylglycerol-1-palmitoleoyl-2-palmitic - 0.4<br>Phosphatidylglycerol-1,2-palmitic-2-palmitic - 1.4<br>Phosphatidylglycerol-1-cis-vaccenoyl-2-palmitoleoyl - 1.8<br>Phosphatidylglycerol-1-cis-vaccenoyl-2-palmitic - 24.9<br>Phosphatidylglycerol-1-palmitic-2-cis-vaccenoyl - 1.7<br>Phosphatidylglycerol-1-cis-vaccenoyl-2-palmitoleoyl(cyclopropanated) - 1.1<br>Phosphatidylglycerol-1-cis-vaccenoyl(cyclopropanated)-2-palmitoleoyl - 1.1<br>Phosphatidylglycerol-1-cis-vaccenoyl(cyclopropanated)-2-palmitic - 2.6<br>Phosphatidylglycerol-1-cis-vaccenoyl-2-cis-vaccenoyl - 57.3<br>Phosphatidylglycerol-1-cis-vaccenoyl(cyclopropanated)-2-cis-vaccenoyl - 7.3<br>Phosphatidylglycerol-1-cis-vaccenoyl(cyclopropanated)-2-cis-vaccenoyl(cyclopropanated) - 0.3 |
| Cardiolipin <sup>d</sup>              | 0.398            | Cardiolipin-1,2-(1-palmitoleoyl-2-palmitic) - 0.4<br>Cardiolipin-1,2-(1,2-palmitic) - 1.4<br>Cardiolipin-1,2-(1-cis-vaccenoyl-2-palmitoleoyl) - 1.8<br>Cardiolipin-1,2-(1-cis-vaccenoyl-2-palmitic) - 24.9<br>Cardiolipin-1,2-(1-palmitoleoyl-2-palmitic) - 1.7<br>Cardiolipin-1,2-(1-cis-vaccenoyl-2-palmitoleoyl(cyclopropanated)) - 1.1<br>Cardiolipin-1,2-(1-cis-vaccenoyl(cyclopropanated)-2-palmitoleoyl) - 1.1<br>Cardiolipin-1,2-(1-cis-vaccenoyl(cyclopropanated)-2-palmitic) - 2.6<br>Cardiolipin-1,2-(1-cis-vaccenoyl-2-cis-vaccenoyl) - 57.3<br>Cardiolipin-1,2-(1-cis-vaccenoyl(cyclopropanated)-2-cis-vaccenoyl) - 7.3<br>Cardiolipin-1,2-(1-cis-vaccenoyl(cyclopropanated)-2-cis-vaccenoyl(cyclopropanated)) - 0.3                                              |
| Phosphatidylethanolamine <sup>d</sup> | 1.754            | Phosphatidylethanolamine-1-cis-vaccenoyl-2-palmitoleoyl - 0.9<br>Phosphatidylethanolamine-1-cis-vaccenoyl-2-palmitic - 7.0<br>Phosphatidylethanolamine-1-cis-vaccenoyl-2-palmitoleoyl(cyclopropanated) - 1.05<br>Phosphatidylethanolamine-1-cis-vaccenoyl(cyclopropanated)-2-palmitoleoyl - 1.05<br>Phosphatidylethanolamine-1-cis-vaccenoyl(cyclopropanated)-2-palmitic - 2.9<br>Phosphatidylethanolamine-1,2-cis-vaccenoyl - 47.2<br>Phosphatidylethanolamine-1-cis-vaccenoyl(cyclopropanated)-2-cis-vaccenoyl - 35.5<br>Phosphatidylethanolamine-1-cis-vaccenoyl(cyclopropanated)-2-cis-vaccenoyl(cyclopropanated) - 4.4                                                                                                                                                    |
| Monomethylethanolamine <sup>d</sup>   | 1.491            | Monomethyl-phosphatidylethanolamine-1-cis-vaccenoyl-2-palmitoleoyl - 0.9<br>Monomethyl-phosphatidylethanolamine-1-cis-vaccenoyl-2-palmitic - 7.0<br>Monomethyl-phosphatidylethanolamine-1-cis-vaccenoyl-2-palmitoleoyl(cyclopropanated) - 1.05<br>Monomethyl-phosphatidylethanolamine-1-cis-vaccenoyl(cyclopropanated)-2-palmitoleoyl - 1.05<br>Monomethyl-phosphatidylethanolamine-1-cis-vaccenoyl(cyclopropanated)-2-palmitic - 2.9<br>Monomethyl-phosphatidylethanolamine-1,2-cis-vaccenoyl - 47.2<br>Monomethyl-phosphatidylethanolamine-1-cis-vaccenoyl(cyclopropanated)-2-cis-vaccenoyl - 35.5<br>Monomethyl-phosphatidylethanolamine-1-cis-vaccenoyl(cyclopropanated)-2-cis-                                                                                            |

|                                                                                                     |       |                                                                                             |
|-----------------------------------------------------------------------------------------------------|-------|---------------------------------------------------------------------------------------------|
| Phosphatidylcholine <sup>d</sup>                                                                    | 7.670 | vaccenoyl(cyclopropanated) - 4.4                                                            |
|                                                                                                     |       | Phosphatidylcholine-1-cis-vaccenoyl-2-palmitoleoyl - 0.9                                    |
|                                                                                                     |       | Phosphatidylcholine-1-cis-vaccenoyl-2-palmitic - 7.0                                        |
|                                                                                                     |       | Phosphatidylcholine-1-cis-vaccenoyl-2-palmitoleoyl(cyclopropanated) - 1.05                  |
|                                                                                                     |       | Phosphatidylcholine-1-cis-vaccenoyl(cyclopropanated)-2-palmitoleoyl - 1.05                  |
|                                                                                                     |       | Phosphatidylcholine-1-cis-vaccenoyl(cyclopropanated)-2-palmitic - 2.9                       |
|                                                                                                     |       | Phosphatidylcholine-1,2-cis-vaccenoyl - 47.2                                                |
|                                                                                                     |       | Phosphatidylcholine-1-cis-vaccenoyl(cyclopropanated)-2-cis-vaccenoyl - 35.5                 |
|                                                                                                     |       | Phosphatidylcholine-1-cis-vaccenoyl(cyclopropanated)-2-cis-vaccenoyl(cyclopropanated) - 4.4 |
|                                                                                                     |       | Sulfoquinovosyldiacylglycerol <sup>d</sup>                                                  |
| Sulfoquinovosyl-1,2-palmitic-sn-glycerol - 17.2                                                     |       |                                                                                             |
| Sulfoquinovosyl-1-cis-vaccenoyl-2-palmitoleoyl - 1.4                                                |       |                                                                                             |
| Sulfoquinovosyl-1-cis-vaccenoyl-2-palmitic - 21.8                                                   |       |                                                                                             |
| Sulfoquinovosyl-1-palmitic-2-cis-vaccenoyl - 10.1                                                   |       |                                                                                             |
| Sulfoquinovosyl-1-cis-vaccenoyl-2-palmitoleoyl(cyclopropanated) - 0.75                              |       |                                                                                             |
| Sulfoquinovosyl-1-cis-vaccenoyl(cyclopropanated)-2-palmitoleoyl - 0.75                              |       |                                                                                             |
| Sulfoquinovosyl-1-cis-vaccenoyl(cyclopropanated)-2-palmitic - 3.1                                   |       |                                                                                             |
| Sulfoquinovosyl-1-palmitic-2-cis-vaccenoyl(cyclopropanated)-sn-glycerol - 2.3                       |       |                                                                                             |
| Sulfoquinovosyl-1-cis-vaccenoyl-2-cis-vaccenoyl-sn-glycerol - 17.8                                  |       |                                                                                             |
| Sulfoquinovosyl-1-cis-vaccenoyl(cyclopropanated)-2-cis-vaccenoyl-sn-glycerol - 10.5                 |       |                                                                                             |
| Sulfoquinovosyl-1-cis-vaccenoyl(cyclopropanated)-2-cis-vaccenoyl(cyclopropanated)-sn-glycerol - 0.5 |       |                                                                                             |
| Sulfoquinovosyl-1-cis-vaccenoyl-steric-sn-glycerol - 10.8                                           |       |                                                                                             |
| Ornithine lipids <sup>d</sup>                                                                       | 0.230 |                                                                                             |
|                                                                                                     |       | Ornithine-1-steric-2-palmitoleoyl - 0.7                                                     |
|                                                                                                     |       | Ornithine-1-palmitic-2-cis-vaccenoyl(cyclopropanated) - 1.0                                 |
|                                                                                                     |       | Ornithine-1-steric-2-palmitoleoyl(cyclopropanated) - 2.1                                    |
|                                                                                                     |       | Ornithine-1-cis-vaccenoyl-2-cis-vaccenoyl - 3.0                                             |
|                                                                                                     |       | Ornithine-1-steric-2-cis-vaccenoyl - 37.1                                                   |
|                                                                                                     |       | Ornithine-1-cis-vaccenoyl-2-cis-vaccenoyl(cyclopropanated) - 5.3                            |
|                                                                                                     |       | Ornithine-1-steric-2-cis-vaccenoyl(cyclopropanated) - 49.8                                  |
|                                                                                                     |       | Ornithine-1-cis-vaccenoyl(cyclopropanated)-2-cis-vaccenoyl(cyclopropanated) - 0.6           |
| Poly-3-hydroxybutyrate                                                                              | 17.6  | N/A                                                                                         |
| Glycogen                                                                                            | 0.4   | N/A                                                                                         |
| Lipopolysaccharide                                                                                  | 3     | N/A                                                                                         |
| Peptidoglycan                                                                                       | 2     | N/A                                                                                         |
| Low molecular weight succinoglycan <sup>e</sup>                                                     | 4     | N/A                                                                                         |
| High molecular weight succinoglycan <sup>e</sup>                                                    | 1     | N/A                                                                                         |
| Vitamins, cofactors, coenzymes, ions, and other <sup>f</sup>                                        | Trace | Polyphosphate                                                                               |
|                                                                                                     |       | Pantothenate                                                                                |
|                                                                                                     |       | Coenzyme A                                                                                  |
|                                                                                                     |       | NAD <sup>+</sup> ; NADH                                                                     |
|                                                                                                     |       | NADP <sup>+</sup> ; NADPH                                                                   |
|                                                                                                     |       | FAD <sup>+</sup> , FADH <sub>2</sub>                                                        |
|                                                                                                     |       | Folate; Tetrahydrofolate; 5,10-Methylenetetrahydrofolate                                    |
|                                                                                                     |       | Thiamine diphosphate                                                                        |
|                                                                                                     |       | Riboflavin                                                                                  |
|                                                                                                     |       | Biotin                                                                                      |
|                                                                                                     |       | Heme A                                                                                      |
|                                                                                                     |       | Vitamin B12 coenzyme                                                                        |
|                                                                                                     |       | Undecaprenyl diphosphate                                                                    |
|                                                                                                     |       | Ubiquinone-8                                                                                |
|                                                                                                     |       | Pyridoxal phosphate                                                                         |
|                                                                                                     |       | Glutathionine reduced                                                                       |
|                                                                                                     |       | Glutathionine oxidized                                                                      |
|                                                                                                     |       | All-trans-Phytoene                                                                          |
|                                                                                                     |       | Holo-carboxylase                                                                            |
|                                                                                                     |       | Co <sup>2+</sup> (Cobalt)                                                                   |
|                                                                                                     |       | Mg <sup>+</sup> (Magnesium)                                                                 |
|                                                                                                     |       | Ca <sup>2+</sup> (Calcium)                                                                  |
|                                                                                                     |       | Mn <sup>2+</sup> (Manganese)                                                                |
| Fe <sup>3+</sup> (Iron)                                                                             |       |                                                                                             |
| Fe <sup>2+</sup> (Iron)                                                                             |       |                                                                                             |
| Zn <sup>2+</sup> (Zinc)                                                                             |       |                                                                                             |
| K <sup>+</sup> (Potassium)                                                                          |       |                                                                                             |
| Na <sup>+</sup> (Sodium)                                                                            |       |                                                                                             |

<sup>a</sup> Composition based on the overall GC content of *S. meliloti* [1].

- <sup>b</sup> The GC content for mRNA was estimated from the overall GC content of *S. meliloti* [1]. The GC content of tRNA was estimated based on the GC content of the 10 most common codons in *S. meliloti* [1,2]. The GC content of rRNA was determined based on the *rrn* loci of *S. meliloti* [1]. The overall composition of cellular RNA was determined assuming 80% rRNA, 15% tRNA, and 5% mRNA.
- <sup>c</sup> The amino acid composition was estimated based on the codon usage of *S. meliloti* [2].
- <sup>d</sup> The membrane lipid composition used was as previously determined for *S. meliloti* [3].
- <sup>e</sup> A 4:1 ratio of low molecular weight (LMW) to high molecular weight (HMW) succinoglycan was set as previously determined [4].
- <sup>f</sup> Each of these compounds were included at an equal, trace concentration in the biomass.

## REFERENCES

1. Galibert F, Finan TM, Long SR, Pühler A, Abola AP, Ampe F, et al. The composite genome of the legume symbiont *Sinorhizobium meliloti*. *Science*. 2001;293: 668–672. doi:10.1126/science.1060966
2. Nakamura Y, Gojobori T, Ikemura T. Codon usage tabulated from international DNA sequence databases: status for the year 2000. *Nucleic Acids Res*. 1999;28: 292.
3. Basconcillo LS, Zaheer R, Finan TM, McCarry BE. A shotgun lipidomics study of a putative lysophosphatidic acid acyl transferase (PlsC) in *Sinorhizobium meliloti*. *J Chromatogr B*. 2009;877: 2873–2882. doi:10.1016/j.jchromb.2009.05.014
4. Glenn SA, Gurich N, Feeney MA, González JE. The ExpR/Sin quorum-sensing system controls succinoglycan production in *Sinorhizobium meliloti*. *J Bacteriol*. 2007;189: 7077–7088. doi:10.1128/JB.00906-07
