# Supplementary material for: Robustness encoded across essential and accessory replicons of the ecologically versatile bacterium Sinorhizobium meliloti
Source: PubMed Central journal article supplement (PMC5929573; doi:10.1371/journal.pgen.1007357), 2018-04-19
Supplement: pgen.1007357.s008.pdf [file pgen.1007357.s008.pdf]

**Table S5.** Bacterial strains and plasmids.

| Strains or plasmids           | Relevant characteristics/description                                      | Source or reference |
|-------------------------------|---------------------------------------------------------------------------|---------------------|
| <i>Sinorhizobium meliloti</i> |                                                                           |                     |
| RmP3496                       | <i>S. meliloti</i> ΔpSymAB                                                | [1]                 |
| RmP3499                       | RmP3496 with pSymA and pSymB re-introduced                                | [1]                 |
| AB001                         | Δ <i>proC</i> in RmP3496                                                  | This study          |
| AB002                         | Δ <i>proC</i> in RmP3499                                                  | This study          |
| AB003                         | Δ <i>cbrA</i> in RmP3496                                                  | This study          |
| AB004                         | Δ <i>cbrA</i> in RmP3499                                                  | This study          |
| AB005                         | Δ <i>tig</i> in RmP3496                                                   | This study          |
| AB006                         | Δ <i>tig</i> in RmP3499                                                   | This study          |
| AB007                         | Δ <i>feuQ</i> in RmP3496                                                  | This study          |
| AB008                         | Δ <i>feuQ</i> in RmP3499                                                  | This study          |
| AB009                         | Δ <i>ppk</i> in RmP3496                                                   | This study          |
| AB010                         | Δ <i>ppk</i> in RmP3499                                                   | This study          |
| AB011                         | Δ <i>smc00712</i> in RmP3496                                              | This study          |
| AB012                         | Δ <i>smc00712</i> in RmP3499                                              | This study          |
| AB013                         | Δ <i>rhaK</i> in RmP3496                                                  | This study          |
| AB014                         | Δ <i>rhaK</i> in RmP3499                                                  | This study          |
| AB015                         | Δ <i>amiC</i> in RmP3499                                                  | This study          |
| AB016                         | Δ <i>fbpB</i> in RmP3499                                                  | This study          |
| AB017                         | Δ <i>aidB</i> in RmP3499                                                  | This study          |
| AB018                         | Δ <i>smc00575</i> in RmP3499                                              | This study          |
| AB019                         | Δ <i>tal</i> in RmP3499                                                   | This study          |
| AB020                         | Δ <i>kpsF3</i> in RmP3499                                                 | This study          |
| AB026                         | Δ <i>carA</i> in RmP3499                                                  | This study          |
| AB021                         | Δ <i>carA</i> in RmP3496                                                  | This study          |
| AB022                         | Δ <i>exoN2</i> in RmP3499                                                 | This study          |
| AB024                         | Δ <i>coaA</i> in RmP3499                                                  | This study          |
| AB033                         | Δ <i>coaA</i> in RmP3496                                                  | This study          |
| AB025                         | Δ <i>smc00074</i> in RmP3499                                              | This study          |
| AB034                         | Δ <i>smc00074</i> in RmP3496                                              | This study          |
| AB028                         | Δ <i>smc01361</i> in RmP3499                                              | This study          |
| AB029                         | Δ <i>argD</i> in RmP3499                                                  | This study          |
| AB037                         | Δ <i>argD</i> in RmP3496                                                  | This study          |
| AB030                         | Δ <i>ilvC</i> in RmP3499                                                  | This study          |
| AB031                         | Δ <i>serC</i> in RmP3499                                                  | This study          |
| AB032                         | Δ <i>smc04042</i> in RmP3499                                              | This study          |
| <i>Escherichia coli</i>       |                                                                           |                     |
| DH5α                          | <i>E. coli</i> cloning and expression strain                              | [2]                 |
| B001                          | DH5α harboring helper plasmid pRK600 (Cm <sup>R</sup> )                   | [3]                 |
| Plasmids                      |                                                                           |                     |
| pJG194                        | 2.2 kb mobilizable suicide plasmid (Km <sup>R</sup> /Nm <sup>R</sup> )    | [4]                 |
| pRK600                        | Self-transmissible helper plasmid (Cm <sup>R</sup> )                      | [3]                 |
| pJG714                        | Transposon delivery vector for Tn-seq (Km <sup>R</sup> /Nm <sup>R</sup> ) | This study          |
| pAB001                        | <i>ftsK</i> fragment cloned into pJG194                                   | This study          |
| pAB004                        | <i>proC</i> fragment cloned into pJG194                                   | This study          |
| pAB006                        | <i>smc00074</i> fragment cloned into pJG194                               | This study          |
| pAB008                        | <i>amiC</i> fragment cloned into pJG194                                   | This study          |
| pAB010                        | <i>fbpB</i> fragment cloned into pJG194                                   | This study          |
| pAB012                        | <i>cbrA</i> fragment cloned into pJG194                                   | This study          |
| pAB014                        | <i>tig</i> fragment cloned into pJG194                                    | This study          |
| pAB016                        | <i>feuQ</i> fragment cloned into pJG194                                   | This study          |
| pAB018                        | <i>aidB</i> fragment cloned into pJG194                                   | This study          |
| pAB019                        | <i>ppk</i> fragment cloned into pJG194                                    | This study          |

|        |                                                            |            |
|--------|------------------------------------------------------------|------------|
| pAB021 | <i>smc00575</i> fragment cloned into pJG194                | This study |
| pAB023 | <i>tal</i> fragment cloned into pJG194                     | This study |
| pAB024 | <i>kspF3</i> fragment cloned into pJG194                   | This study |
| pAB025 | <i>exoN2</i> fragment cloned into pJG194                   | This study |
| pAB026 | <i>smc00712</i> fragment cloned into pJG194                | This study |
| pAB027 | <i>carA</i> fragment cloned into pJG194                    | This study |
| pAB028 | <i>coaA</i> fragment cloned into pJG194                    | This study |
| pAB031 | <i>smc02836</i> fragment cloned into pJG194                | This study |
| pAB032 | <i>rhaK</i> fragment cloned into pJG194                    | This study |
| pAB033 | <i>argD</i> fragment cloned into pJG194                    | This study |
| pAB034 | <i>smc04042</i> fragment cloned into pJG194                | This study |
| pAB035 | <i>smc01361</i> fragment cloned into pJG194                | This study |
| pAB036 | <i>ilvC</i> fragment cloned into pJG194                    | This study |
| pAB037 | <i>serC</i> fragment cloned into pJG194                    | This study |
| pAB038 | <i>smc01011</i> knock out 1 fragment cloned into pJG194    | This study |
| pAB039 | <i>smc01011</i> knock out 2 fragment cloned into pJG194    | This study |
| pAB040 | <i>smc01011</i> Non-disruption fragment cloned into pJG194 | This study |
| pAB041 | <i>smc03995</i> knock out 1 fragment cloned into pJG194    | This study |
| pAB042 | <i>smc03995</i> knock out 2 fragment cloned into pJG194    | This study |
| pAB043 | <i>smc03995</i> Non-disruption fragment cloned into pJG194 | This study |
| pAB047 | <i>fumC</i> Non-disruption fragment cloned into pJG194     | This study |
| pAB048 | <i>fumC</i> knock out 1 fragment cloned into pJG194        | This study |
| pAB049 | <i>fumC</i> knock out 2 fragment cloned into pJG194        | This study |
| pAB050 | <i>pdxJ</i> Non-disruption fragment cloned into pJG194     | This study |
| pAB051 | <i>pdxJ</i> knock out 1 fragment cloned into pJG194        | This study |
| pAB052 | <i>pdxJ</i> knock out 2 fragment cloned into pJG194        | This study |

## REFERENCES

1. diCenzo GC, Zamani M, Milunovic B, Finan TM. Genomic resources for identification of the minimal N<sub>2</sub>-fixing symbiotic genome. *Environ Microbiol.* 2016;18: 2534–2547. doi:10.1111/1462-2920.13221
2. Grant SG, Jessee J, Bloom FR, Hanahan D. Differential plasmid rescue from transgenic mouse DNAs into *Escherichia coli* methylation-restriction mutants. *Proc Natl Acad Sci USA.* 1990;87: 4645–4649.
3. Finan TM, Kunkel B, De Vos GF, Signer ER. Second symbiotic megaplasmid in *Rhizobium meliloti* carrying exopolysaccharide and thiamine synthesis genes. *J Bacteriol.* 1986;167: 66–72.
4. Griffiths JS, Long SR. A symbiotic mutant of *Sinorhizobium meliloti* reveals a novel genetic pathway involving succinoglycan biosynthetic functions. *Mol Microbiol.* 2008;67: 1292–1306. doi:10.1111/j.1365-2958.2008.06123.x
