# Supplementary material for: Robustness encoded across essential and accessory replicons of the ecologically versatile bacterium Sinorhizobium meliloti
Source: PubMed Central journal article supplement (PMC5929573; doi:10.1371/journal.pgen.1007357), 2018-04-19
Supplement: pgen.1007357.s009.pdf [file pgen.1007357.s009.pdf]

**Table S6. Oligonucleotides used in this study.**

| Name <sup>a</sup>                 | Oligonucleotide sequence <sup>b</sup>                                             |
|-----------------------------------|-----------------------------------------------------------------------------------|
| <b>Tn-seq primers</b>             |                                                                                   |
| 1TN                               | CTGACCCGGTTCGAC                                                                   |
| 1GG                               | CAGACGTGTGCTCTCCGATCggggggggggg                                                   |
| 2TNA                              | AATGATACGGCGACCACCGAGATCTACACTCTTTCCCTACACGACGCTCTCCGATCTTCGAGATGTGTATAAGAGACAG   |
| 2TNB                              | AATGATACGGCGACCACCGAGATCTACACTCTTTCCCTACACGACGCTCTCCGATCTATCGAGATGTGTATAAGAGACAG  |
| 2TNC                              | AATGATACGGCGACCACCGAGATCTACACTCTTTCCCTACACGACGCTCTCCGATCTGATCGAGATGTGTATAAGAGACAG |
| 2BAR1                             | CAAGCAGAAGACGGCATAACGAGATCGTGATGTGACTGGAGTTCAGACGTGTGCTCTTCCGATC                  |
| 2BAR2                             | CAAGCAGAAGACGGCATAACGAGATACATCGGTGACTGGAGTTCAGACGTGTGCTCTTCCGATC                  |
| 2BAR3                             | CAAGCAGAAGACGGCATAACGAGATGCCTAAGTACTGGAGTTCAGACGTGTGCTCTTCCGATC                   |
| 2BAR4                             | CAAGCAGAAGACGGCATAACGAGATATTGGCGTACTGGAGTTCAGACGTGTGCTCTTCCGATC                   |
| 2BAR5                             | CAAGCAGAAGACGGCATAACGAGATCACTGTGTGACTGGAGTTCAGACGTGTGCTCTTCCGATC                  |
| 2BAR6                             | CAAGCAGAAGACGGCATAACGAGATGACTCTGGTACTGGAGTTCAGACGTGTGCTCTTCCGATC                  |
| 2BAR7                             | CAAGCAGAAGACGGCATAACGAGATTGGTCAAGTACTGGAGTTCAGACGTGTGCTCTTCCGATC                  |
| 2BAR8                             | CAAGCAGAAGACGGCATAACGAGATCTGATCGTACTGGAGTTCAGACGTGTGCTCTTCCGATC                   |
| <b>smc01335 -amiC Disruption</b>  |                                                                                   |
| 01335F                            | 5'- cccgaattcAAGTGAAGCCGGTGGAGG                                                   |
| 01335R                            | 5'- gggaaagctAACGTGTGGCGTGAACCG                                                   |
| 01335C                            | 5'- ATCGTGTAGACCGTGGCGCC                                                          |
| <b>smc00074 Disruption</b>        |                                                                                   |
| 00074F                            | 5'- cccgaattcTCGCAGCCGGTCTCGTGAT                                                  |
| 00074R                            | 5'- gggaaagctGGTATCGCCTGATCCCGT                                                   |
| 00074C                            | 5'- CGTTCATCGTTCGAGCG                                                             |
| <b>smc02050 -tig Disruption</b>   |                                                                                   |
| 02050F                            | 5'- cccgaattcTCGACGGCGAAGCCTTCG                                                   |
| 02050R                            | 5'- gggaaagctAGGCGCTCGGGTGTATCG                                                   |
| 02050C                            | 5'- CGGTGTTGATCTGGCGCC                                                            |
| <b>smc00129 -feuQ Disruption</b>  |                                                                                   |
| 00129F                            | 5'- cccgaattcTATCGACCGCTTCACGCG                                                   |
| 00129R                            | 5'- gggaaagctTGGCGCGGCTGAGATAGG                                                   |
| 00129C                            | 5'- GAACCGACCCGCGCTGGG                                                            |
| <b>smc00776 -cbrA Disruption</b>  |                                                                                   |
| 00776F                            | 5'- cccgaattcGGCAGTGGGAAAGATGCC                                                   |
| 00776R                            | 5'- gggaaagctTCCATTGCCGACGACGG                                                    |
| 00776C                            | 5'- GCTGCTCATGGCTGCACC                                                            |
| <b>smc03808 -ftsK Disruption:</b> |                                                                                   |
| 03808F                            | 5'- gacgaattcGGCACATTGAACGAGCCGG                                                  |
| 03808R                            | 5'- gggaaagctACATGGATGATCTCGCCC                                                   |
| 03808C                            | 5'- GCCGGTTCAGCTCATAG                                                             |
| <b>smc01359 -aidB Disruption</b>  |                                                                                   |
| 01359F                            | 5'- cccgaattcTACCTCCACGGCCGAACG                                                   |
| 01359R                            | 5'- gggaaagctTATCGAAGGCTTCGGCCAGG                                                 |
| 01359C                            | 5'- TCGCGACCCGGCTCATGAT                                                           |
| <b>smc00575 Disruption</b>        |                                                                                   |
| 00575F                            | 5'- cccgaattcGCCGCTGGAGGCGAACAAGAA                                                |
| 00575R                            | 5'- gggaaagctGCAGCGGTCTATCTGCTT                                                   |
| 00575C                            | 5'- CTCCCAGATCTGCTGCAC                                                            |
| <b>smc00618 ppk Disruption</b>    |                                                                                   |
| 00618F                            | 5'- cccgaattcAGGAACTCGGCGTTCCTCG                                                  |
| 00618R                            | 5'- gggaaagctCGGATATTTGCCCTCCTCG                                                  |
| 00618C                            | 5'- CCGAAAACACCTGCACG                                                             |
| <b>smc00775 -fbpB Disruption</b>  |                                                                                   |
| 00775F                            | 5'- cccgaattcTCACGCTCGTTGCCATGG                                                   |
| 00775R                            | 5'- gggaaagctCAGGAACTGGTTCGAGGCC                                                  |
| 00775C                            | 5'- GACACCAGGATGCTGTGC                                                            |
| <b>smc02677 -proC Disruption</b>  |                                                                                   |
| 02677F                            | 5'- cccgaattcTCTTCCTCGCGGTCAAGC                                                   |
| 02677R                            | 5'- gggaaagctTAGGTCCGCTCGAGTCC                                                    |
| 02677C                            | 5'- GGTTCCTCCGAGCAAGACG                                                           |
| <b>smc02495 -tal Disruption</b>   |                                                                                   |
| 02495F                            | 5'- cccgaattcCGACATCGTCGAGGTTACCA                                                 |
| 02495R                            | 5'- gggaaagctGGCTTCCTTACGTGGTTGA                                                  |
| 02495C                            | 5'- CCTTCCACTCCATGCCATT                                                           |
| <b>smc02268 -kpsF3 Disruption</b> |                                                                                   |
| 02268F                            | 5'- cccgaattcATGATCACCGCTCAGGATGC                                                 |
| 02268R                            | 5'- gggaaagctGTGATGACGCCGATCAGCTT                                                 |
| 02268C                            | 5'- CGGTGAGACTCAGCCAAGA                                                           |
| <b>smc04023 -exoN2</b>            |                                                                                   |

04023F 5'- cccgaattcGGACAAGCCGGTCATCCAAT  
 04023R 5'- ggggaagcttTCGACCATCCTGGTGATCCT  
 04023C 5'- GCAGGATGTAGCGGCCATT  
**smc00712 -hypothetical**  
 00712F 5'- cccgaattcAGATCCAGAAGCGGCTGACT  
 00712R 5'- ggggaagcttATGCTGAGTGCCGCGTCTA  
 00712C 5'- ACTCTGCCTTGTCGCGCAA  
**smc03826 -argG**  
 03826F 5'- cccgaattcGCTCGGCATCAAGGAGATCT  
 03826R 5'- ggggaagcttTGCGCATGTGCACGTATTC  
 03826C 5'- CTTGTCTAGGTGCCGCTTC  
**smc01569 -carA**  
 01569F 5'- cccgaattcAGGACATCGAGGATCTGACG  
 01569R 5'- ggggaagcttTCGAGAGCCACGACGTGATA  
 01569C 5'- ATGACCGGCACGGCATATT  
**smc02567 -coaA**  
 02567F 5'- cccgaattcAACGATCCGGTTCGATCTCGA  
 02567R 5'- ggggaagcttATAGGTCGGAGCCTTGACGT  
 02567C 5'- AGACCATCGGCACGATCTT  
**smc01011 -KO1**  
 01011KO1F 5'- cccgaattcTCAGCCCGCTCATCACCGAT  
 01011KO1R 5'- ggggaagcttCCATCCTCCTCACGTCCGA  
**smc01011 -KO2**  
 01011KO2F 5'- cccgaattcAAGATTCGCGTGCCCGAAGA  
 01011KO2R 5'- ggggaagcttGAGGATCGACCAGGCGGTAT  
**smc01011 -ND**  
 01011NDF 5'- cccgaattcCCGAACAAGGACAAGATCT  
 01011NDR 5'- ggggaagcttACGGCAATGTGCTGGACGA  
 01011NDC 5'- GAGGAGCGCTCGGTCAACAT  
**smc03995 -KO1**  
 03995KO1F 5'- cccgaattcATCACGCCTTCAACGGCGC  
 03995KO1R 5'- ggggaagcttTTCATCAGTTCGTCCGGCCCT  
**smc03995 -KO2**  
 03995KO2F 5'- cccgaattcATGCGCTGATCCTGATGGAG  
 03995KO2R 5'- ggggaagcttGAGATGGGAGAGCCGGTTCT  
**smc03995 -ND**  
 03995NDF 5'- cccgaattcAAGTGGTACGTGCTCTCGCG  
 03995NDR 5'- ggggaagcttTTGAAGACGGCCTGGACCAT  
 03995NDC 5'- GTACTTCGCCGAAATCGCGT  
**smc00149 -fumC KO1**  
 00149KO1F 5'- cccgaattcCGGAACCCAGTCCGAACATGA  
 00149KO1R 5'- ggggaagcttTTGATCGAGGAGGCGACCTG  
**smc00149 -fumC KO2**  
 00149KO2F 5'- cccgaattcACATCATCAAGATCGGCCGC  
 00149KO2R 5'- ggggaagcttTTGACCTTGCCCGGCATGAT  
**smc00149 -fumC ND**  
 00149NDF 5'- cccgaattcATGCTGGTACTGCGCTTGC  
 00149NDR 5'- ggggaagcttTCATCGTGGTCACGATCGGC  
 00149NDC 5'- CTGCCTTGACCGGTTCCCTC  
**smc01407 -pdxJ KO1**  
 01407KO1F 5'- cccGTCGACTTCCGATCTCCAGCCGATCC  
 01407KO1R 5'- gggCTCGAGTAGAGTTCTATGCGGTCCGG  
**smc01407 -pdxJ KO2**  
 01407KO2F 5'- cccGTCGACTCGCAAGAGCCATAACCTGC  
 01407KO2R 5'- gggCTCGAGGGTCTCGCCATTCCGTATT  
**smc01407 -pdxJ ND**  
 01407NDF 5'- cccgaattcGAAGTCTCGATCGGACACGG  
 01407NDR 5'- ggggaagcttGCAATTGCGAGATACAGCGC  
 01407NDC 5'- TAAAGTTCGATGCCGAGCGCG  
**smc02138 -argD**  
 02138F 5'- cccgaattcTCTTACCAATTCGGGTGCG  
 02138R 5'- ggggaagcttTTCATGGGCGAAGAGCTTGC  
 02138C 5'- TTCGGCGGAGAACGACGTCTGA  
**smc04042**  
 04042F 5'- cccgaattcTGCATTCATCTCCGGCCTGC  
 04042R 5'- ggggaagcttTGCTCGATCAGCGGAATGAG  
 04042C 5'- CCTGCCAGTCCGGTGATGATT  
**smc01361**  
 01361F 5'- cccgaattcTGCACGATACGCTCGTGCTT  
 01361R 5'- ggggaagcttTCGACGTCTCGGATCATG

01361C 5'- TCAAGGTCGATGACGGCGAT  
**smc04346 -itvC**  
 04346F 5'- cccgaattcACGGCCTCAACGTCCACTTC  
 04346R 5'- ggggaagcttCGACGATCAGCTTCACTTCG  
 04346C 5'- TGTCTTCGGTGATGATGCGC  
**smc00640 -serC**  
 00640F 5'- cccgaattcGACGTGGTCTTCACCTGGAA  
 00640R 5'- ggggaagcttCCAGAGAAGCGCGTCGATAT  
 00640C 5'- AGGTTGGCGATCCAGTCGTT  
**smb20960 -exoN**  
 20960F 5'- cgcggatecTTCCGAACTCGAGGCCATGT  
 20960R 5'- gcgtctagaGCCATCGGTCAACTGGATCT  
 20960C 5'- GAAGGCGACATTGGCTTCGA  
 20960C 5'- ACGACGAATGCGGCCACAAG  
**pJG520 vector check primer**  
 VCpJG520 5'- CCGCAGTGGCTCTCTATACA  
**smc03003 -rhaK non-disruption control**  
 03003F 5'- cccgaattcCTGAACAGCACGGGAACGAG  
 03003R 5'- ggggaagcttCATACAGCGCCATGCGTCTC  
 03003C 5'- AACGCAGCCACAGGTTTC

---

<sup>a</sup>Primer names indicate whether the primer was used for insert amplification (F, R) or for confirming plasmid integration in *S. meliloti* (C).

<sup>b</sup>Nucleotides annealing to the template are in uppercase letters. Five prime extensions to facilitate cloning are in lowercase letters. Underlined nucleotides in the Tn-seq primers indicate locations of sequence variability in each series of primers.
