# Supplementary material for: Robustness encoded across essential and accessory replicons of the ecologically versatile bacterium Sinorhizobium meliloti
Source: PubMed Central journal article supplement (PMC5929573; doi:10.1371/journal.pgen.1007357), 2018-04-19
Supplement: pgen.1007357.s010.pdf [file pgen.1007357.s010.pdf]

**Table S7.** Boundary conditions for *in silico* metabolic modeling analyses.

| Exchange reaction | Compound                                   | Lower boundary | Upper Boundary |
|-------------------|--------------------------------------------|----------------|----------------|
| EX_cpd00013_e0    | Ammonia (NH <sub>3</sub> )                 | -10            | 1000           |
| EX_cpd00001_e0    | Water (H <sub>2</sub> O)                   | -10            | 1000           |
| EX_cpd00007_e0    | Oxygen (O <sub>2</sub> )                   | -10            | 1000           |
| EX_cpd00009_e0    | Phosphate (PO <sub>4</sub> <sup>3-</sup> ) | -10            | 1000           |
| EX_cpd00011_e0    | Carbon dioxide (CO <sub>2</sub> )          | -10            | 1000           |
| EX_cpd00030_e0    | Manganese (Mn <sup>2+</sup> )              | -10            | 1000           |
| EX_cpd00034_e0    | Zinc (Zn <sup>2+</sup> )                   | -10            | 1000           |
| EX_cpd00048_e0    | Sulfate (SO <sub>4</sub> <sup>2-</sup> )   | -10            | 1000           |
| EX_cpd00058_e0    | Copper (Cu <sup>2+</sup> )                 | -10            | 1000           |
| EX_cpd00063_e0    | Calcium (Ca <sup>2+</sup> )                | -10            | 1000           |
| EX_cpd00067_e0    | Proton (H <sup>+</sup> )                   | -10            | 1000           |
| EX_cpd00076_e0    | Sucrose                                    | -1             | 1000           |
| EX_cpd00099_e0    | Chloride (Cl <sup>-</sup> )                | -10            | 1000           |
| EX_cpd00104_e0    | Biotin                                     | -10            | 1000           |
| EX_cpd00149_e0    | Cobalt (Co <sup>2+</sup> )                 | -10            | 1000           |
| EX_cpd00205_e0    | Potassium (K <sup>+</sup> )                | -10            | 1000           |
| EX_cpd00254_e0    | Magnesium (Mg <sup>+</sup> )               | -10            | 1000           |
| EX_cpd00971_e0    | Sodium (Na <sup>+</sup> )                  | -10            | 1000           |
| EX_cpd10515_e0    | Iron (Fe <sup>2+</sup> )                   | -10            | 1000           |
| EX_cpd10516_e0    | Iron (Fe <sup>3+</sup> )                   | -10            | 1000           |
| EX_cpd00305_e0    | Thiamine                                   | -10            | 1000           |

All values are given in units of: mmol (g cell dry weight)<sup>-1</sup> hr<sup>-1</sup>. All exchange reactions not listed has a lower bound of '0' and an upper bound of '1000'.
