# Supplementary material for: Robustness encoded across essential and accessory replicons of the ecologically versatile bacterium Sinorhizobium meliloti
Source: PubMed Central journal article supplement (PMC5929573; doi:10.1371/journal.pgen.1007357), 2018-04-19
Supplement: pgen.1007357.s011.pdf [file pgen.1007357.s011.pdf]

**Table S8.** Biomass composition of iGD1575b and iGD1575c.<sup>a</sup>

| Component                      | Percent dry mass | Composition - %                                                                                                                                                                                                                                                                                                                                                                                |
|--------------------------------|------------------|------------------------------------------------------------------------------------------------------------------------------------------------------------------------------------------------------------------------------------------------------------------------------------------------------------------------------------------------------------------------------------------------|
| DNA                            | 2.8              | Guanine - 31.05<br>Cytosine - 31.05<br>Adenine - 18.95<br>Thymine - 18.95                                                                                                                                                                                                                                                                                                                      |
| RNA                            | 7.1              | Guanine - 28.09<br>Cytosine - 28.09<br>Adenine - 21.91<br>Uracil - 21.91                                                                                                                                                                                                                                                                                                                       |
| Protein                        | 49.3             | Lysine - 3.20<br>Alanine - 12.01<br>Leucine 10.19<br>Phenylalanine - 3.94<br>Arginine 7.33<br>Glutamine - 2.90<br>Glycine - 8.46<br>Methionine - 2.44<br>Valine - 7.58<br>Proline - 5.03<br>Tyrosine - 2.29<br>Aspartate - 5.31<br>Glutamate - 5.84<br>Histidine - 2.11<br>Threonine - 5.15<br>Cysteine - 0.93<br>Isoleucine - 5.48<br>Tryptophan - 1.38<br>Asparagine - 2.64<br>Serine - 5.80 |
| Lipid                          | 12.8             | PG(36:2) - 7.82<br>CL(36:2) - 3.11<br>PE(36:2) - 25.35<br>PC(36:2) - 59.92<br>SL(36:2) - 2.00<br>OL(36:1) - 1.80                                                                                                                                                                                                                                                                               |
| PHB                            | 17.6             | N/A                                                                                                                                                                                                                                                                                                                                                                                            |
| Glycogen                       | 0.4              | N/A                                                                                                                                                                                                                                                                                                                                                                                            |
| LPS                            | 3                | N/A                                                                                                                                                                                                                                                                                                                                                                                            |
| Cell wall                      | 2                | N/A                                                                                                                                                                                                                                                                                                                                                                                            |
| LMW Succinoglycan <sup>b</sup> | 4                | N/A                                                                                                                                                                                                                                                                                                                                                                                            |
| HMW Succinoglycan <sup>b</sup> | 1                | N/A                                                                                                                                                                                                                                                                                                                                                                                            |
| Putrescine                     | Trace            | N/A                                                                                                                                                                                                                                                                                                                                                                                            |

|                                                 |       |                                                                                                                                                                                                                                                                                                                                                                                                                                                                                                                                                                                                                                                                                                          |
|-------------------------------------------------|-------|----------------------------------------------------------------------------------------------------------------------------------------------------------------------------------------------------------------------------------------------------------------------------------------------------------------------------------------------------------------------------------------------------------------------------------------------------------------------------------------------------------------------------------------------------------------------------------------------------------------------------------------------------------------------------------------------------------|
| Spermidine                                      | Trace | N/A                                                                                                                                                                                                                                                                                                                                                                                                                                                                                                                                                                                                                                                                                                      |
| Vitamins, cofactors, coenzymes, ions, and other | Trace | Polyphosphate<br>Pantothenate<br>Coenzyme A<br>NAD <sup>+</sup> ; NADH<br>NADP <sup>+</sup> ; NADPH<br>FAD <sup>+</sup> , FADH <sub>2</sub><br>Folate; Tetrahydrofolate; 5,10-Methylenetetrahydrofolate<br>Thiamine diphosphate<br>Riboflavin<br>Biotin<br>Heme A<br>Vitamin B12 coenzyme<br>Undecaprenyl diphosphate<br>Ubiquinone-8<br>Pyridoxal phosphate<br>Glutathionine reduced<br>Glutathionine oxidized<br>Holo-carboxylase<br>Co <sup>2+</sup> (Cobalt)<br>Mg <sup>+</sup> (Magnesium)<br>Ca <sup>2+</sup> (Calcium)<br>Mn <sup>2+</sup> (Manganese)<br>Fe <sup>3+</sup> (Iron)<br>Fe <sup>2+</sup> (Iron)<br>Zn <sup>2+</sup> (Zinc)<br>K <sup>+</sup> (Potassium)<br>Na <sup>+</sup> (Sodium) |

<sup>a</sup> The composition of all components was set as described previously for iGD1575 [1]. The exception are the vitamins, cofactors, coenzymes, and ions that are newly added, and were included at an equal, trace concentration in the biomass.

<sup>b</sup> Succinoglycan was removed from the biomass of iGD1575c.

## REFERENCES

1. diCenzo GC, Checcucci A, Bazzicalupo M, Mengoni A, Viti C, Dziewit L, et al. Metabolic modelling reveals the specialization of secondary replicons for niche adaptation in *Sinorhizobium meliloti*. Nat Commun. 2016;7: 12219. doi:10.1038/ncomms12219
