# Supplementary material for: Robustness encoded across essential and accessory replicons of the ecologically versatile bacterium Sinorhizobium meliloti
Source: PubMed Central journal article supplement (PMC5929573; doi:10.1371/journal.pgen.1007357), 2018-04-19
Supplement: pgen.1007357.s012.pdf [file pgen.1007357.s012.pdf]

**Table S9.** Gene essentiality data represented in Figure 6.

| Gene                                                             | Wild-type GEI | $\Delta$ pSymAB GEI | $\log_{10}(\text{GEI ratio } [\Delta\text{pSymAB} / \text{wild-type}])$ |
|------------------------------------------------------------------|---------------|---------------------|-------------------------------------------------------------------------|
| Cytochrome C oxidase related proteins, defined medium            |               |                     |                                                                         |
| <i>ctaC</i>                                                      | 0.812         | 0.040               | -1.313                                                                  |
| <i>ctaD</i>                                                      | 0.107         | 0.011               | -0.979                                                                  |
| <i>ctaB</i>                                                      | 0.081         | 0.061               | -0.123                                                                  |
| <i>ctaG</i>                                                      | 1.454         | 0.146               | -0.999                                                                  |
| <i>ctaE</i>                                                      | 0.168         | 0.014               | -1.091                                                                  |
| <i>ccsA</i>                                                      | 0.401         | 0.007               | -1.775                                                                  |
| <i>cycH</i>                                                      | 2.037         | 1.559               | -0.116                                                                  |
| <i>cycJ</i>                                                      | 1.344         | 0.658               | -0.310                                                                  |
| <i>cycK</i>                                                      | 1.454         | 0.140               | -1.016                                                                  |
| <i>cycL</i>                                                      | 1.077         | 0.252               | -0.630                                                                  |
| <i>ccmA</i>                                                      | 0.990         | 0.131               | -0.877                                                                  |
| <i>ccmB</i>                                                      | 1.664         | 0.130               | -1.106                                                                  |
| <i>ccmC</i>                                                      | 1.265         | 0.272               | -0.667                                                                  |
| <i>ccmD</i>                                                      | 1.367         | 0.011               | -2.083                                                                  |
| <i>ccmG</i>                                                      | 2.368         | 0.264               | -0.952                                                                  |
| Proline biosynthesis, rich medium                                |               |                     |                                                                         |
| <i>proB1</i>                                                     | 7.335         | 0.267               | -1.438                                                                  |
| <i>proA</i>                                                      | 4.505         | 0.002               | -3.285                                                                  |
| <i>proC</i>                                                      | 2.250         | 0.002               | -2.964                                                                  |
| Histidine biosynthesis, rich medium *                            |               |                     |                                                                         |
| <i>hisB</i>                                                      | 2.530         | 0.010               | -2.410                                                                  |
| <i>smc04042</i>                                                  | 0.600         | 0.062               | -0.989                                                                  |
| <i>hisD</i>                                                      | 0.103         | 0.008               | -1.089                                                                  |
| Glycolysis and related proteins, rich medium                     |               |                     |                                                                         |
| <i>glk</i>                                                       | 2.613         | 0.342               | -0.883                                                                  |
| <i>frk</i>                                                       | 0.673         | 0.008               | -1.950                                                                  |
| <i>pgi</i>                                                       | 0.001         | 0.001               | 0.000                                                                   |
| <i>zwf</i>                                                       | 0.235         | 0.001               | -2.239                                                                  |
| <i>pgl</i>                                                       | 0.658         | 0.003               | -2.362                                                                  |
| <i>edd</i>                                                       | 3.284         | 0.063               | -1.720                                                                  |
| <i>eda2</i>                                                      | 1.903         | 0.698               | -0.436                                                                  |
| <i>gap</i>                                                       | 1.300         | 0.002               | -2.818                                                                  |
| <i>pgk</i>                                                       | 1.928         | 0.024               | -1.902                                                                  |
| <i>gpmA</i>                                                      | 2.637         | 1.538               | -0.234                                                                  |
| <i>eno</i>                                                       | 1.110         | 1.129               | 0.007                                                                   |
| <i>pykA</i>                                                      | 2.017         | 0.424               | -0.678                                                                  |
| <i>pyc</i>                                                       | 4.409         | 0.223               | -1.296                                                                  |
| Periplasmic cyclic $\beta$ -glucans biosynthesis, defined medium |               |                     |                                                                         |
| <i>feuN</i>                                                      | 1.095         | 0.282               | -0.590                                                                  |
| <i>feuP</i>                                                      | 0.938         | 0.003               | -2.498                                                                  |
| <i>feuQ</i>                                                      | 10.855        | 0.012               | -2.947                                                                  |
| <i>ndvA</i>                                                      | 1.434         | 0.001               | -3.123                                                                  |
| <i>ndvB</i>                                                      | 3.218         | 0.129               | -1.396                                                                  |

| Arginine biosynthesis, rich medium       |       |       |        |
|------------------------------------------|-------|-------|--------|
| <i>argB</i>                              | 0.802 | 2.125 | 0.423  |
| <i>argC</i>                              | 0.636 | 3.618 | 0.755  |
| <i>argD</i>                              | 1.499 | 1.467 | -0.010 |
| <i>argJ</i>                              | 3.118 | 4.134 | 0.122  |
| <i>argF1</i>                             | 0.012 | 1.776 | 2.168  |
| <i>argG</i>                              | 0.002 | 1.281 | 2.892  |
| <i>argH1</i>                             | 0.198 | 1.011 | 0.708  |
| AICAR biosynthesis, rich medium          |       |       |        |
| <i>purF</i>                              | 0.506 | 2.273 | 0.652  |
| <i>purD</i>                              | 0.716 | 2.770 | 0.588  |
| <i>purN</i>                              | 1.962 | 3.974 | 0.307  |
| <i>smc00494</i>                          | 0.469 | 2.774 | 0.772  |
| <i>purL</i>                              | 0.996 | 5.689 | 0.757  |
| <i>purQ</i>                              | 0.908 | 2.351 | 0.413  |
| <i>purM</i>                              | 1.060 | 3.070 | 0.462  |
| <i>purE</i>                              | 1.387 | 2.399 | 0.238  |
| <i>purK</i>                              | 2.029 | 3.562 | 0.244  |
| <i>purC</i>                              | 0.302 | 0.175 | -0.237 |
| <i>purB</i>                              | 0.002 | 0.799 | 2.542  |
| <i>purH</i>                              | 0.624 | 0.705 | 0.053  |
| UMP biosynthesis, rich medium            |       |       |        |
| <i>carA</i>                              | 0.007 | 3.928 | 2.721  |
| <i>carB</i>                              | 0.001 | 1.930 | 3.130  |
| <i>pyrB</i>                              | 0.062 | 2.364 | 1.584  |
| <i>smc01361</i>                          | 0.417 | 2.793 | 0.826  |
| <i>pyrC</i>                              | 0.134 | 0.689 | 0.711  |
| <i>pyrD</i>                              | 0.193 | 2.700 | 1.146  |
| <i>pyrE</i>                              | 0.300 | 2.266 | 0.878  |
| <i>pyrF</i>                              | 0.323 | 4.956 | 1.185  |
| LPS core oligosaccharide, defined medium |       |       |        |
| <i>lpsC</i>                              | 0.101 | 1.555 | 1.188  |
| <i>lpsD</i>                              | 1.154 | 2.969 | 0.410  |
| <i>lpsE</i>                              | 0.832 | 2.609 | 0.496  |

\* Represents just the final steps of this process, from the conversion of imidazole-acetol-phosphate to L-histidine.
