# Supplementary material for: Robustness encoded across essential and accessory replicons of the ecologically versatile bacterium Sinorhizobium meliloti
Source: PLoS Genet. 2018 Apr 19;14(4):e1007357. doi: 10.1371/journal.pgen.1007357 (PMC5929573; doi:10.1371/journal.pgen.1007357)
Supplement: S5 Dataset — This file contains an Excel formatted version of the iGD726 core metabolic network reconstruction. A legend sheet is included to explain the contents of the file. All references present in this file are listed in S1 File. (XLSX) [file pgen.1007357.s033.xlsx]

## Sheet: Legend
Data Set S5. Excel file of the S. meliloti core metabolic network reconstruction iGD726. This file contains an Excel formatted version of the iGD726 metabolic network reconstruction. All references present in this file are included in the Supplementary References section of the Supplementary Materials.
Reactions sheet. This sheet contains all reactions from the iGD727 reconstruction. Each row represents one reaction, and the columns are described below.
RxnID. The systematic identifier of the reaction.
RxnName. The descriptive name of the reaction.
Reaction_A. The reaction formula using the metabolite systematic identifiers.
Reaction_B. The reaction formula using the real metabolie names.
Reversible. Indicates if the reaction is reversible (TRUE) or not (FALSE).
KEGG_RID. The KEGG systematic identifier for the reaction.
EnzymeClass. The enzyme classification number.
Genes. The genes associated with the reaction, using the locus tags, formatted in SBML format.
Proteins. The proteins associated with the reaction, using the gene names, formatted in SBML format.
Support_level. The type of support for the association of the genes to the reaction.
Refereces. References associated with the reaction or genes. The full reference is provided in the Supplementary References of File S1.
Notes. Comments associated with the reactin
Others. All other columns have as the header a species name. In these columns, the putative orthologous genes to those in the 'Genes' field from the indicated species are given.
Metabolites sheet. This sheet contains all metabolites from the iGD727 reconstruction. Each row represents one metabolite, and the columns are described below.
CpdID. The systematic identifier of the reaction.
CpdName. The descriptive name of the metabolite.
Compartment. Indicates if the metabolite is intra-cellular, extra-cellular, or a boundary metabolite.
Charge. Indicates the charge of the metabolite.
BoundaryConditions. Indicates if the metabolite is a boundary metabolite.

## Sheet: Reactions
RxnID	RxnName	Reaction_A	Reaction_B	Reversible	KEGG_RID	EnzymeClass	Genes	Proteins	Support_level	References	Notes	Empty	S. medicae WSM419	S. fredii NGR234	E. adhearens OV14	R. leguminosarum bv. viciae 3841	R. etli CFN 42	A. fabrum C58	L. crescens BT-0	M. loti MAFF303099	B. abortus C68	B. diazoefficiens USDA 110
Central carbon metabolism
rxn02380	Glucose-6-phosphate isomerase _ reaction 1	cpd00863_c0 (1) <==> cpd00072_c0 (1)	beta_D_Glucose_6_phosphate_c0 (1) <==> D_fructose_6_phosphate_c0 (1)	TRUE	R03321	5.3.1.9	smc02163	Pgi	Experimental	Arias et al 1979; This study			Smed_0109	pgi	pgi	pgi	pgi	pgi	RL73_06455	mlr5411	DK53_326	noHit
rxn01977	Glucose-6-phosphate isomerase _ reaction 2	cpd00079_c0 (1) <==> cpd00863_c0 (1)	D_glucose_6_phosphate_c0 (1) <==> beta_D_Glucose_6_phosphate_c0 (1)	TRUE	R02739	5.1.3.15	smc02163	Pgi	Experimental	Arias et al 1979; This study			Smed_0109	pgi	pgi	pgi	pgi	pgi	RL73_06455	mlr5411	DK53_326	noHit
rxn00604	Glucose-6-phosphate 1-dehydrogenase	cpd00006_c0 (1) + cpd00079_c0 (1) <==> cpd00067_c0 (1) + cpd00911_c0 (1) + cpd00005_c0 (1)	NADP_c0 (1) + D_glucose_6_phosphate_c0 (1) <==> H_c0 (1) + 6_phospho_D_glucono_1_5_lactone_c0 (1) + NADPH_c0 (1)	TRUE	R00835	1.1.1.49	smc03070	Zwf	Experimental	Cerveñansky and Arias 1984; Barra et al 2003; This study			Smed_0300	NGR_c03190	OV14_1618	zwf1	zwf1	zwf	RL73_02105	mll6516	zwf	zwf
rxn01476	Phosphogluconolactonase	cpd00001_c0 (1) + cpd00911_c0 (1) ==> cpd00067_c0 (1) + cpd00284_c0 (1)	H2O_c0 (1) + 6_phospho_D_glucono_1_5_lactone_c0 (1) ==> H_c0 (1) + 6_Phospho_D_gluconate_c0 (1)	FALSE	R02035	3.1.1.31	smc03069	Pgl	Experimental	This study			Smed_0299	NGR_c03180	OV14_1617	pgl	pgl	pgl	RL73_02100	mll6514	pgl	blr6761
rxn01477	Phosphogluconate dehydratase	cpd00284_c0 (1) ==> cpd00001_c0 (1) + cpd02711_c0 (1)	6_Phospho_D_gluconate_c0 (1) ==> H2O_c0 (1) + 2_Keto_3_deoxy_6_phosphogluconate_c0 (1)	FALSE	R02036	4.2.1.12	(smc03068 or sma0235)	(Edd or Sma0235)	Experimental	diCenzo and Finan 2015; This study	edd encodes the primary enzyme catalyzing this reaction, but sma0235 can partially complement mutations of edd.		(Smed_0298 or Smed_2488)	(NGR_c03170 or noHit)	(OV14_1616 or noHit)	(edd or ilvD4)	(edd or RHE_CH03347)	(edd or ilvD)	(noHit or noHit)	(mll6512 or mlr5404)	(edd or DK53_2297)	(noHit or bll3915)
rxn03884	2-dehydro-3-deoxyphosphogluconate aldolase	cpd02711_c0 (1) <==> cpd00102_c0 (1) + cpd00020_c0 (1)	2_Keto_3_deoxy_6_phosphogluconate_c0 (1) <==> Glyceraldehyde3_phosphate_c0 (1) + Pyruvate_c0 (1)	TRUE	R05605	4.1.2.14	smc03153	Eda2	Experimental	This study			Smed_2779	NGR_c29340	OV14_0400	eda	eda	kdgA	noHit	mlr2994	eda	kdgA
rxn00781	Glyceraldehyde 3-phosphate dehydrogenase	cpd00102_c0 (1) + cpd00009_c0 (1) + cpd00003_c0 (1) <==> cpd00004_c0 (1) + cpd00203_c0 (1)	Glyceraldehyde3_phosphate_c0 (1) + Phosphate_c0 (1) + NAD_c0 (1) <==> NADH_c0 (1) + 1_3_Bisphospho_D_glycerate_c0 (1)	TRUE	R01061	1.2.1.13	smc03979	Gap	Experimental	Finan et al 1988; This study			Smed_2651	NGR_c28070	OV14_0248	gap	gap	gapA	gapA	mlr3750	gap	gapA
rxn01100	Phosphoglycerate kinase	cpd00067_c0 (1) + cpd00002_c0 (1) + cpd00169_c0 (1) <==> cpd00008_c0 (1) + cpd00203_c0 (1)	H_c0 (1) + ATP_c0 (1) + 3_Phosphoglycerate_c0 (1) <==> ADP_c0 (1) + 1_3_Bisphospho_D_glycerate_c0 (1)	TRUE	R01512	2.7.2.3	smc03981	Pgk	Experimental	Finan et al 1988; diCenzo and Finan 2015; This study			Smed_2653	NGR_c28090	OV14_0250	pgk	pgk	pgk	pgk	mlr3753	DK53_1674	pgk
rxn01106	Phosphoglycerate mutase	cpd00482_c0 (1) <==> cpd00169_c0 (1)	2_Phospho_D_glycerate_c0 (1) <==> 3_Phosphoglycerate_c0 (1)	TRUE	R01518	5.4.2.4	(smc02838 or smc00006)	(GpmA or GpmB)	Experimental but incomplete	This study	The Tn-seq data of this study suggested that gpmA encoded the primary enzyme catalyzing this reaction but that gpmA was likely not absolutely essential. This may be due to partial completemenation by gpmB, and so both genes are included in this reaction.		(Smed_3372 or Smed_0513)	(gpmA or gpmB)	(gpmA or gpmB)	(gpmA or gpmB2)	(gpmA or gpmB)	(noHit or gpmB)	(RL73_03565 or noHit)	(mlr4643 or mlr7459)	(gpm1 or DK53_447)	(blr0686 or gpmB)
rxn00459	Phosphopyruvate hydratase _ Enolase	cpd00482_c0 (1) <==> cpd00001_c0 (1) + cpd00061_c0 (1)	2_Phospho_D_glycerate_c0 (1) <==> H2O_c0 (1) + Phosphoenolpyruvate_c0 (1)	TRUE	R00658	4.2.1.11	smc01028	Eno	Experimental	Finan et al 1988; This study			Smed_1072	NGR_c12800	OV14_2516	eno	eno	eno	eno	mlr0378	eno	eno
rxn00148	Pyruvate kinase	cpd00061_c0 (1) + cpd00008_c0 (1) ==> cpd00002_c0 (1) + cpd00020_c0 (1)	Phosphoenolpyruvate_c0 (1) + ADP_c0 (1) ==> ATP_c0 (1) + Pyruvate_c0 (1)	FALSE	R00200	2.7.1.40	smc04005	PykA	Experimental but incomplete	This study	The Tn-seq data of this study was consistent with pykA encoding this enzyme, and the ortholog in R. leguminosarum was shown to be a pyruvate kinase (Mulley et al 2010).		Smed_2676	NGR_c28350	OV14_0285	ttuE	pykA	pykA	RL73_00815	mll3819	pyk	pykA
rxn00250	Pyruvate carboxylase	cpd00002_c0 (1) + cpd00020_c0 (1) + cpd00242_c0 (1) ==> cpd00067_c0 (1) + cpd00032_c0 (1) + cpd00009_c0 (1) + cpd00008_c0 (1)	ATP_c0 (1) + Pyruvate_c0 (1) + H2CO3_c0 (1) ==> H_c0 (1) + Oxaloacetate_c0 (1) + Phosphate_c0 (1) + ADP_c0 (1)	FALSE	R00344	6.4.1.1	smc03895	Pyc	Experimental	Dunn et al 2001; This study			Smed_3139	NGR_c32860	OV14_0804	RL4638	pyc	pycA	noHit	mll3969	pyc	noHit
rxn00247	Phosphoenolpyruvate carboxykinase	cpd00067_c0 (1) + cpd00002_c0 (1) + cpd00032_c0 (1) ==> cpd00011_c0 (1) + cpd00061_c0 (1) + cpd00008_c0 (1)	H_c0 (1) + ATP_c0 (1) + Oxaloacetate_c0 (1) ==> CO2_c0 (1) + Phosphoenolpyruvate_c0 (1) + ADP_c0 (1)	FALSE	R00341	4.1.1.49	smc02562	PckA	Experimental	Østerås et al 1995			Smed_3253	pckA	pckA	pckA	pckA	pckA	RL73_00065	mlr5096	pckA	pckA
rxn00747	Triose phosphate isomerase	cpd00102_c0 (1) <==> cpd00095_c0 (1)	Glyceraldehyde3_phosphate_c0 (1) <==> Glycerone_phosphate_c0 (1)	TRUE	R01015	5.3.1.1	(smc01614 or smc01023)	(TpiB or TpiA)	Experimental	Poysti and Oresnik 2007	tpiA mutants could not grow with glycerol or rhamnose, tpiB mutants could not grow with erythritol, and double mutants could not grow with succinate.		(Smed_2150 or Smed_1067)	(tpiA or NGR_c12760)	(tpiA or OV14_2506)	(tpiA2 or tpiA)	(tpiAf or tpiAch)	(noHit or tpiA)	(noHit or RL73_02425)	(mlr7275 or mll0610)	(DK53_2367 or tpiA)	(noHit or tpiA)
rxn00786	Fructose bisphosphate aldolase	cpd00290_c0 (1) <==> cpd00102_c0 (1) + cpd00095_c0 (1)	D_fructose_1_6_bisphosphate_c0 (1) <==> Glyceraldehyde3_phosphate_c0 (1) + Glycerone_phosphate_c0 (1)	TRUE	R01068	4.1.2.13	(smb21192 or smb20199 or smc03983)	(CbbA2 or CbbA or FbaB)	Predicted		Each of these genes show similarity to genes encoding fructuse bisphosphate aldolases, however, it has not been experimentially determined which one(s) display this activity in S. meliloti.		(Smed_4683 or Smed_3923 or Smed_2654)	(cbbA1 or cbbA2 or fbaB)	(cbbA1 or noHit or fbaB)	(noHit or pRL120196 or RL4012)	(noHit or noHit or fbaB)	(noHit or noHit or Atu3740)	(noHit or noHit or RL73_06150)	(noHit or mll7273 or mlr3754)	(noHit or fba or noHit)	(noHit or cbbA or bll1520)
rxn00549	Fructose-1_6-bisphosphatase	cpd00001_c0 (1) + cpd00290_c0 (1) ==> cpd00067_c0 (1) + cpd00072_c0 (1) + cpd00009_c0 (1)	H2O_c0 (1) + D_fructose_1_6_bisphosphate_c0 (1) ==> H_c0 (1) + D_fructose_6_phosphate_c0 (1) + Phosphate_c0 (1)	FALSE	R00762	3.1.3.11	(smb20202 or Unknown)	(CbbF or Unknown)	Experimental but incomplete	Pickering and Oresnik 2008	Experimental data is consistent with cbbF encoding a fructose-1,6-bisphosphatase. However, deletion of this gene does not prevent growth with gluconeogenic substrate suggesting at least one additional copy exists in the genome (diCenzo et al 2016).		(Smed_3920 or Unknown)	(cbbF or Unknown)	(noHit or Unknown)	(noHit or Unknown)	(noHit or Unknown)	(noHit or Unknown)	(noHit or Unknown)	(noHit or Unknown)	(DK53_2364 or Unknown)	(cbbF or Unknown)
rxn01115	6_Phospho_D_gluconate_NADP_2_oxidoreductase_decarboxylating_c0	cpd00006_c0 (1) + cpd00284_c0 (1) ==> cpd00011_c0 (1) + cpd00171_c0 (1) + cpd00005_c0 (1)	NADP_c0 (1) + 6_Phospho_D_gluconate_c0 (1) ==> CO2_c0 (1) + D_Ribulose5_phosphate_c0 (1) + NADPH_c0 (1)	FALSE	R01528	1.1.1.44	smc04262	Gnd	Predicted				Smed_1732	NGR_c17890	OV14_3154	gnd	gnd	gntZ	RL73_06430	mll3321	gnd	blr6759
rxn00777	Ribose-5-phosphate isomerase	cpd00101_c0 (1) <==> cpd00171_c0 (1)	ribose_5_phosphate_c0 (1) <==> D_Ribulose5_phosphate_c0 (1)	TRUE	R01056	5.3.1.6	smc00152	RpiA	Experimental	This study			Smed_1573	rpiA	rpiA	rpiA	rpiA	rpiA	RL73_03775	mll0526	rpiA	rpiA
rxn01116	Ribulose-5-phosphate epimerase	cpd00171_c0 (1) <==> cpd00198_c0 (1)	D_Ribulose5_phosphate_c0 (1) <==> D_Xylulose5_phosphate_c0 (1)	TRUE	R01529	5.1.3.1	(smc00511 or smb20195)	(Rpe or Ppe)	Experimental but incomplete	This study	Mutation of rpe had no effect in this Tn-seq study excet when pSymA and pSymB were removed, suggesting a second copy is encoded on pSymA or pSymB. The most likely candidate is ppe. However, as the rpe mutation in a strain lacking pSymA and pSymB still grows, albiet more slowly, and in silico modelling suggests this is because this reaction is non-essential.		(Smed_1489 or Smed_3927)	(rpe or noHit)	(rpe or noHit)	(rpe or noHit)	(rpe or noHit)	(rpe or noHit)	(RL73_02785 or noHit)	(noHit or mlr4760)	(rpe or noHit)	(rpe or noHit)
rxn01200	Transketolase _ ribose-5-phosphate xylulose-5-phosphate	cpd00238_c0 (1) + cpd00102_c0 (1) <==> cpd00198_c0 (1) + cpd00101_c0 (1)	Sedoheptulose7_phosphate_c0 (1) + Glyceraldehyde3_phosphate_c0 (1) <==> D_Xylulose5_phosphate_c0 (1) + ribose_5_phosphate_c0 (1)	TRUE	R01641	2.2.1.1	smc03978	Tkt2	Experimental	Hawkins et al 2017a; Hawkins et al 2017b; This study	A second gene, tkt1, appears to have some Tkt activity and can partially complement a tkt2 mutant when over-expressed (Hawkins et al 2017b). But under the tested conditions, it does not appear sufficient for growth.		Smed_2650	NGR_c28060	OV14_0247	cbbT	tkt	tktA	RL73_06165	mlr3749	tkt	tktA
rxn01333	Transaldolase	cpd00238_c0 (1) + cpd00102_c0 (1) <==> cpd00236_c0 (1) + cpd00072_c0 (1)	Sedoheptulose7_phosphate_c0 (1) + Glyceraldehyde3_phosphate_c0 (1) <==> D_Erythrose4_phosphate_c0 (1) + D_fructose_6_phosphate_c0 (1)	TRUE	R08575	2.2.1.2	smc02495	Tal	Experimental but incomplete	Hawkins et al 2017b; This study	This Tn-seq data suggested that mutation of tal has major growth phenotype with sucrose when pSymA and pSymB are removed. This provides support for the functional annotation of this gene. It is likely that the phenotype in the pSymA/pSymB cured strain is due to loss of a pathway removing build-up of intermediates instead of the removal of a bypass mechanism. The lack of a phenotype in wild-type i…		Smed_2928	NGR_c31170	OV14_0608	noHit	tal	noHit	noHit	mlr4072	fsa	noHit
rxn00785	Transketolase _ erythrulose-4-phosphate xylulose-5-phosphate	cpd00102_c0 (1) + cpd00072_c0 (1) <==> cpd00236_c0 (1) + cpd00198_c0 (1)	Glyceraldehyde3_phosphate_c0 (1) + D_fructose_6_phosphate_c0 (1) <==> D_Erythrose4_phosphate_c0 (1) + D_Xylulose5_phosphate_c0 (1)	TRUE	R01830	2.2.1.1	smc03978	Tkt2	Experimental	Hawkins et al 2017a; Hawkins et al 2017b; This study	A second gene, tkt1, appears to have some Tkt activity and can partially complement a tkt2 mutant when over-expressed (Hawkins et al 2017b). But under the tested conditions, it does not appear sufficient for growth.		Smed_2650	NGR_c28060	OV14_0247	cbbT	tkt	tktA	RL73_06165	mlr3749	tkt	tktA
rxn00159	NAD-dependent malic enzyme	cpd00130_c0 (1) + cpd00003_c0 (1) ==> cpd00020_c0 (1) + cpd00011_c0 (1) + cpd00004_c0 (1)	L_Malate_c0 (1) + NAD_c0 (1) ==> Pyruvate_c0 (1) + CO2_c0 (1) + NADH_c0 (1)	FALSE	R00214	4.1.1.3	smc00169	Dme	Experimental	Driscoll and Finan 1993			Smed_1558	dme	dme	dme	dme	maeB	noHit	mlr0809	dme	dme
rxn00161	NADP-dependent malic enzyme	cpd00130_c0 (1) + cpd00006_c0 (1) ==> cpd00020_c0 (1) + cpd00011_c0 (1) + cpd00005_c0 (1)	L_Malate_c0 (1) + NADP_c0 (1) ==> Pyruvate_c0 (1) + CO2_c0 (1) + NADPH_c0 (1)	FALSE	R00216	4.1.1.3	smc01126	Tme	Experimental	Driscoll and Finan 1996			Smed_0029	NGR_c00300	OV14_1314	tme	tme	Atu3356	noHit	mlr5329	noHit	noHit
rxn00011p	Pyruvate dehydrogenase complex E1 _ thiamine diphosphate acetaldehyde transferase	cpd00067_c0 (1) + cpd00020_c0 (1) + cpd00056_c0 (1) ==> cpd03049p_c0 (1) + cpd00011_c0 (1)	H_c0 (1) + Pyruvate_c0 (1) + TPP_c0 (1) ==> 2_Hydroxyethyl_ThPP_pyruvate dehydrogenase_c0 (1) + CO2_c0 (1)	FALSE	R00014	2.2.1.6	(smc01031 and smc01030)	(PdhB and PdhA)	Experimental	Cabanes et al 2000; Cowie et al 2006; This study			(Smed_1077 and Smed_1076)	(pdhB3 and pdhA2)	(pdhB3 and pdhA2)	(pdhB and pdhA)	(pdhA2 and pdhA1)	(pdhB and pdhA)	(RL73_05590 and RL73_05585)	(mlr0384 and mlr0383)	(DK53_1118 and pdhA)	(pdhB and pdhA)
rxn02342	Pyruvate dehydrogenase complex E1 _ Pyruvate dehydrogenase	cpd00213_c0 (1) + cpd03049p_c0 (1) <==> cpd00836_c0 (1) + cpd00056_c0 (1)	Lipoamide_c0 (1) + 2_Hydroxyethyl_ThPP_pyruvate dehydrogenase_c0 (1) <==> S_Acetyldihydrolipoamide_c0 (1) + TPP_c0 (1)	TRUE	R03270	1.2.4.1	(smc01031 and smc01030)	(PdhB and PdhA)	Experimental	Cabanes et al 2000; Cowie et al 2006; This study			(Smed_1077 and Smed_1076)	(pdhB3 and pdhA2)	(pdhB3 and pdhA2)	(pdhB and pdhA)	(pdhA2 and pdhA1)	(pdhB and pdhA)	(RL73_05590 and RL73_05585)	(mlr0384 and mlr0383)	(DK53_1118 and pdhA)	(pdhB and pdhA)
rxn01871	Pyruvate dehydrogenase complex E2 _ Dihydrolipoyl transacetylase	cpd00449a_c0 (1) + cpd00022_c0 (1) <==> cpd00010_c0 (1) + cpd00836_c0 (1)	Dihydrolipoamide of pyruvate dehydrogenase complex_c0 (1) + Acetyl_CoA_c0 (1) <==> CoA_c0 (1) + S_Acetyldihydrolipoamide_c0 (1)	TRUE	R02569	2.3.1.12	smc01032	PdhC	Experimental	Cabanes et al 2000; This study			Smed_1078	NGR_c12850	OV14_2520	pdhC	pdhB	aceF	RL73_05595	mlr0385	DK53_1117	bll4779
rxn01241a	Pyruvate dehydrogenase complex E3 _ Dihydrolipoamide dehydrogenase	cpd00449a_c0 (1) + cpd00003_c0 (1) <==> cpd00213_c0 (1) + cpd00067_c0 (1) + cpd00004_c0 (1)	Dihydrolipoamide of pyruvate dehydrogenase complex_c0 (1) + NAD_c0 (1) <==> Lipoamide_c0 (1) + H_c0 (1) + NADH_c0 (1)	TRUE	R07618	1.8.1.4	smc01035	LpdA1	Experimental	Bielen et al 2014; Soto et al 2001; This study			Smed_1081	NGR_c12880	OV14_2523	RL2246	lpdAch1	lpdA	RL73_05600	mlr0388	lpdA	bll4778
rxn00256	Citrate synthase type II	cpd00032_c0 (1) + cpd00001_c0 (1) + cpd00022_c0 (1) ==> cpd00137_c0 (1) + cpd00067_c0 (1) + cpd00010_c0 (1)	Oxaloacetate_c0 (1) + H2O_c0 (1) + Acetyl_CoA_c0 (1) ==> Citrate_c0 (1) + H_c0 (1) + CoA_c0 (1)	FALSE	R00351	2.3.3.1	smc02087	GltA	Experimental	Mortimer et al 1999; This study			Smed_1144	gltA	gltA	ccsA	gltA	cisY	gltA	mlr0629	gltA	gltA
rxn00973	Iconitate hydratase	cpd00137_c0 (1) <==> cpd00260_c0 (1)	Citrate_c0 (1) <==> Isocitrate_c0 (1)	TRUE	R01324	4.2.1.3	smc03846	AcnA	Experimental	Koziol et al 2009; This study			Smed_3083	acnA	acnA	acnA	acnA	acnA	RL73_00780	mlr4335	acnA	acnA
rxn01387	Isocitrate dehydrogenase_ reaction 1	cpd00006_c0 (1) + cpd00260_c0 (1) <==> cpd00067_c0 (1) + cpd03187_c0 (1) + cpd00005_c0 (1)	NADP_c0 (1) + Isocitrate_c0 (1) <==> H_c0 (1) + Oxalosuccinate_c0 (1) + NADPH_c0 (1)	TRUE	R01899	1.1.1.42	smc00480	Icd	Experimental	McDermott and Kahn 1992; This study			Smed_1519	icd	icd	icd	noHit	icdA	RL73_02440	mll0036	DK53_1183	icdA
rxn00199	Isocitrate dehydrogenase_ reaction 1	cpd00067_c0 (1) + cpd03187_c0 (1) ==> cpd00011_c0 (1) + cpd00024_c0 (1)	H_c0 (1) + Oxalosuccinate_c0 (1) ==> CO2_c0 (1) + 2_Oxoglutarate_c0 (1)	FALSE	R00268	1.1.1.42	smc00480	Icd	Experimental	McDermott and Kahn 1992; This study			Smed_1519	icd	icd	icd	noHit	icdA	RL73_02440	mll0036	DK53_1183	icdA
rxn00441	2-oxoglutarate dehydrogenase E1 component _ reaction 1	cpd00067_c0 (1) + cpd00024_c0 (1) + cpd00056_c0 (1) ==> cpd03189_c0 (1) + cpd00011_c0 (1)	H_c0 (1) + 2_Oxoglutarate_c0 (1) + TPP_c0 (1) ==> 3_Carboxy_1_hydroxypropyl_ThPP_c0 (1) + CO2_c0 (1)	FALSE	R00621	1.2.4.2	smc02482	SucA	Experimental	Dymov et al 2004; This study			Smed_2941	sucA	sucA	sucA	sucA	sucA	sucA	mll4301	sucA	sucA
rxn02376	2-oxoglutarate dehydrogenase E1 component _ reaction 2	cpd00213_c0 (1) + cpd03189_c0 (1) ==> cpd00860_c0 (1) + cpd00056_c0 (1)	Lipoamide_c0 (1) + 3_Carboxy_1_hydroxypropyl_ThPP_c0 (1) ==> S_Succinyldihydrolipoamide_c0 (1) + TPP_c0 (1)	FALSE	R03316	1.2.4.2	smc02482	SucA	Experimental	Dymov et al 2004; This study			Smed_2941	sucA	sucA	sucA	sucA	sucA	sucA	mll4301	sucA	sucA
rxn01872	2-oxoglutarate dehydrogenase E2 component	cpd00449b_c0 (1) + cpd00078_c0 (1) <==> cpd00860_c0 (1) + cpd00010_c0 (1)	Dihydrolipoamide of succinate dehydrogenase complex_c0 (1) + Succinyl_CoA_c0 (1) <==> S_Succinyldihydrolipoamide_c0 (1) + CoA_c0 (1)	TRUE	R02570	2.3.1.61	smc02483	SucB	Experimental	This study			Smed_4111	sucB1	sucB2	noHit	noHit	sucB	RL73_03785	noHit	sucB	sucB
rxn01241b	2-oxoglutarate dehydrogenase E3 component	cpd00449b_c0 (1) + cpd00003_c0 (1) <==> cpd00213_c0 (1) + cpd00067_c0 (1) + cpd00004_c0 (1)	Dihydrolipoamide of succinate dehydrogenase complex_c0 (1) + NAD_c0 (1) <==> Lipoamide_c0 (1) + H_c0 (1) + NADH_c0 (1)	TRUE	R07618	1.8.1.4	smc02487	LpdA2	Experimental	Bielen et al 2014; This study			Smed_2936	lpdA1	lpdA1	lpdA	lpdAch2	lpdA	RL73_03780	mll4296	lpdA	lpdA
rxn00285	Succinate-CoA synthetase	cpd00036_c0 (1) + cpd00002_c0 (1) + cpd00010_c0 (1) <==> cpd00078_c0 (1) + cpd00009_c0 (1) + cpd00008_c0 (1)	Succinate_c0 (1) + ATP_c0 (1) + CoA_c0 (1) <==> Succinyl_CoA_c0 (1) + Phosphate_c0 (1) + ADP_c0 (1)	TRUE	R00405	6.2.1.4	(smc02480 and smc02481)	(SucC and SucD)	Experimental	Dymov et al 2004; This study			(Smed_2943 and Smed_2942)	(sucC and sucD)	(sucC and sucD)	(sucC and sucD)	(sucC and sucD)	(sucC and sucD)	(sucC and RL73_03795)	(mll4306 and mll4303)	(sucC and sucD)	(sucC and sucD)
rxn00288	Succinate dehydrogenase	cpd00036_c0 (1) + cpd00015_c0 (1) <==> cpd00982_c0 (1) + cpd00106_c0 (1)	Succinate_c0 (1) + FAD_c0 (1) <==> FADH2_c0 (1) + Fumarate_c0 (1)	TRUE	R00408	1.3.99.1	(smc02466 and smc02465 and smc02464 and smc02463)	(SdhB and SdhA and SdhD and SdhC)	Experimental	Gardiol et al 1982; This study			(Smed_2956 and Smed_2957 and Smed_2958 and Smed_2959)	(sdhB and sdhA and NGR_c31360 and NGR_c31370)	(sdhB and sdhA and OV14_0629 and OV14_0630)	(sdhB and sdhA and sdhD and sdhC)	(sdhB and sdhA and sdhD and sdhC)	(sdhB and sdhA and sdhD and sdhC)	(RL73_03820 and RL73_03825 and RL73_03830 and RL73_03835)	(mll4260 and mll4263 and mll4265 and mll4266)	(DK53_1828 and sdhA and sdhD and sdhC)	(sdhB and sdhA and sdhD and sdhC)
rxn00799	Fumarate hydratase	cpd00130_c0 (1) <==> cpd00001_c0 (1) + cpd00106_c0 (1)	L_Malate_c0 (1) <==> H2O_c0 (1) + Fumarate_c0 (1)	TRUE	R01082	4.2.1.2	smc00149	FumC	Experimental	This study			Smed_1576	fumC	fumC	fumC	fumC	fumC	fumC	mll8172	fumC	fumC
rxn00248	Malate dehydrogenase	cpd00130_c0 (1) + cpd00003_c0 (1) <==> cpd00067_c0 (1) + cpd00032_c0 (1) + cpd00004_c0 (1)	L_Malate_c0 (1) + NAD_c0 (1) <==> H_c0 (1) + Oxaloacetate_c0 (1) + NADH_c0 (1)	TRUE	R00342	1.1.1.37	smc02479	Mdh	Experimental	Dymov et al 2004; This study			Smed_2944	NGR_c31300	OV14_0624	mdh	mdh	Atu2639	RL73_03805	mll4308	mdh	mdh
rxn00330	Malate synthase	cpd00001_c0 (1) + cpd00040_c0 (1) + cpd00022_c0 (1) ==> cpd00130_c0 (1) + cpd00067_c0 (1) + cpd00010_c0 (1)	H2O_c0 (1) + Glyoxalate_c0 (1) + Acetyl_CoA_c0 (1) ==> L_Malate_c0 (1) + H_c0 (1) + CoA_c0 (1)	FALSE	R00472	2.3.3.9	smc02581	GlcB	Experimental	Ramírez-Trujillo et al 2007; Ramírez-Trujillo et al 2016			Smed_3270	glcB	glcB	glcB	glcB	glcB	noHit	mlr4664	glcB	glcB
Serine and glycine biosynthesis
rxn01101	3-Phospho-glycerate dehydrogenase	cpd00003_c0 (1) + cpd00169_c0 (1) <==> cpd00067_c0 (1) + cpd00004_c0 (1) + cpd02069_c0 (1)	NAD_c0 (1) + 3_Phosphoglycerate_c0 (1) <==> H_c0 (1) + NADH_c0 (1) + 3_Phosphonooxypyruvate_c0 (1)	TRUE	R01513	1.1.1.95	(smc00641 or smc04462 or sma1838 or smb20113 or sma0085 or smc02045 or smc02828 or sma0510 or sma1347)	(SerA or Smc04462 or Sma1838 or Smb20113 or Sma0085 or Smc02045 or Smc02828 or Sma0510 or Sma1347)	Experimental but incomplete	This study	In this Tn-seq data, there were less insertions in serA than expected, consistent with serA encoding the primary enzyme with this function. However, the gene did not appear to be essential, either with and without pSymA and pSymB, indicating that at least one other gene likely is able to at least partially complement serA mutations.		(Smed_2618 or Smed_2763 or Smed_5604 or Smed_4024 or noHit or Smed_2466 or Smed_3362 or noHit or Smed_5864)	(NGR_c27700 or NGR_c29170 or NGR_b06370 or noHit or noHit or NGR_b04550 or NGR_c34780 or NGR_b22260 or noHit)	(OV14_0202 or OV14_0373 or OV14_a1914 or noHit or noHit or OV14_b1211 or OV14_0989 or noHit or noHit)	(RL3960 or RL4144 or pRL120632 or noHit or noHit or noHit or RL0189 or pRL100390 or pRL120588)	(serA or RHE_CH03621 or RHE_PF00336 or noHit or noHit or noHit or RHE_CH00179 or RHE_PC00143 or RHE_PF00379)	(serA or Atu4507 or Atu3399 or noHit or noHit or noHit or noHit or Atu4691 or noHit)	(RL73_04325 or noHit or noHit or noHit or noHit or noHit or noHit or noHit or noHit)	(mll3875 or mlr5162 or mll7048 or noHit or noHit or noHit or mll5489 or noHit or mlr3367)	(serA or DK53_2259 or noHit or noHit or noHit or noHit or DK53_23 or noHit or noHit)	(serA or bll0088 or bll6710 or noHit or noHit or noHit or blr7172 or noHit or blr3173)
rxn02914	Phosphoserine aminotransferase	cpd00738_c0 (1) + cpd00024_c0 (1) <==> cpd02069_c0 (1) + cpd00023_c0 (1)	phosphoserine_c0 (1) + 2_Oxoglutarate_c0 (1) <==> 3_Phosphonooxypyruvate_c0 (1) + L_Glutamate_c0 (1)	TRUE	R04173	2.6.1.52	smc00640	SerC	Experimental	This study	Based on Tn-seq and independent mutagenesis and confirmation of auxotrophy (Figure S14).		Smed_2619	serC	serC	serC	serC	serC	RL73_04330	mll3876	DK53_1636	serC
rxn00420	L_O_Phosphoserine_phosphohydrolase_c0	cpd00738_c0 (1) + cpd00001_c0 (1) ==> cpd00067_c0 (1) + cpd00009_c0 (1) + cpd00054_c0 (1)	phosphoserine_c0 (1) + H2O_c0 (1) ==> H_c0 (1) + Phosphate_c0 (1) + L_Serine_c0 (1)	FALSE	R00582	3.1.3.3	smc01494	SerB	Experimental	This study			Smed_2012	serB	serB	serB	serB	serB	RL73_03300	mlr1449	serB	serB
rxn00692	Serine hydroxymethyltransferase_ SHMT	cpd00001_c0 (1) + cpd00125_c0 (1) + cpd00033_c0 (1) <==> cpd00087_c0 (1) + cpd00054_c0 (1)	H2O_c0 (1) + 5_10_Methylenetetrahydrofolate_c0 (1) + Glycine_c0 (1) <==> Tetrahydrofolate_c0 (1) + L_Serine_c0 (1)	TRUE	R00945	2.1.2.1	smc01770	GlyA	Experimental	This study			Smed_0816	glyA	glyA	glyA	glyA	glyA	glyA	mlr8400	DK53_766	glyA
Proline biosynthesis
rxn00179	Glutamate 5-kinase	cpd00067_c0 (1) + cpd00002_c0 (1) + cpd00023_c0 (1) <==> cpd02097_c0 (1) + cpd00008_c0 (1)	H_c0 (1) + ATP_c0 (1) + L_Glutamate_c0 (1) <==> L_Glutamyl_5_phosphate_c0 (1) + ADP_c0 (1)	TRUE	R00239	2.7.2.11	(smc03776 or smc03252)	(ProB1 or ProB2)	Experimental but incomplete	This study	In this Tn-seq study, less than expected number of insertions were found in proB1, consistent with this gene encoding the primary enzyme with this activity. However, it did not appear to be essential, likely due to partial complementation by proB2. Indeed, proB2 mutants also had ~ 50% less insertions than expected.		(Smed_3010 or noHit)	(proB or noHit)	(proB or noHit)	(proB or noHit)	(proB or noHit)	(proB or noHit)	(RL73_06115 or noHit)	(mll4011 or mlr6298)	(proB or noHit)	(proB or noHit)
rxn02373	Gamma-glutamyl phosphate reductase	cpd02097_c0 (1) + cpd00005_c0 (1) ==> cpd00858_c0 (1) + cpd00006_c0 (1) + cpd00009_c0 (1)	L_Glutamyl_5_phosphate_c0 (1) + NADPH_c0 (1) ==> L_Glutamate5_semialdehyde_c0 (1) + NADP_c0 (1) + Phosphate_c0 (1)	FALSE	R03313	1.2.1.41	smc03777	ProA	Experimental	This study			Smed_3011	proA	proA	proA	proA	proA	proA	mll4009	proA	proA
rxn02374	L-Glutamate-5-semialdehyde dehydratase	cpd00858_c0 (1) ==> cpd00067_c0 (1) + cpd00001_c0 (1) + cpd02431_c0 (1)	L_Glutamate5_semialdehyde_c0 (1) ==> H_c0 (1) + H2O_c0 (1) + 1_Pyrroline_5_carboxylate_c0 (1)	FALSE	R03314		Spontaneous	Spontaneous					Spontaneous	Spontaneous	Spontaneous	Spontaneous	Spontaneous	Spontaneous	Spontaneous	Spontaneous	Spontaneous	Spontaneous
rxn00931	Pyrroline-5-carboxylate reductase	cpd00067_c0 (1) + cpd02431_c0 (1) + cpd00005_c0 (1) <==> cpd00006_c0 (1) + cpd00129_c0 (1)	H_c0 (1) + 1_Pyrroline_5_carboxylate_c0 (1) + NADPH_c0 (1) <==> NADP_c0 (1) + L_Proline_c0 (1)	FALSE	R01251	1.5.1.2	(smb20003 or smc02677)	(Smb20003 or ProC)	Experimental	diCenzo and Finan 2015; This study			(Smed_4127 or Smed_2249)	(proC1 or proC2)	(noHit or proC2)	(proC2 or proC1)	(RHE_PF00430 or proC)	(proC or proC)	(noHit or RL73_06285)	(noHit or mll6498)	(noHit or proC)	(noHit or proC)
Arginine biosynthesis
rxn00192	L-glutamate N-acetyltransferase	cpd00023_c0 (1) + cpd00022_c0 (1) ==> cpd00067_c0 (1) + cpd00477_c0 (1) + cpd00010_c0 (1)	L_Glutamate_c0 (1) + Acetyl_CoA_c0 (1) ==> H_c0 (1) + N_Acetyl_L_glutamate_c0 (1) + CoA_c0 (1)	FALSE	R00259	2.3.1.1	Unknown	Unknown			The enzyme performing this reaction in S. meliloti has not been identified.		Unknown	Unknown	Unknown	Unknown	Unknown	Unknown	Unknown	Unknown	Unknown	Unknown
rxn01917	Acetylglutamate kinase (NAG kinase)	cpd00067_c0 (1) + cpd00002_c0 (1) + cpd00477_c0 (1) <==> cpd02552_c0 (1) + cpd00008_c0 (1)	H_c0 (1) + ATP_c0 (1) + N_Acetyl_L_glutamate_c0 (1) <==> n_acetylglutamyl_phosphate_c0 (1) + ADP_c0 (1)	TRUE	R02649	2.7.2.8	smc01726	ArgB	Experimental	Hernández et al 2015; This study			Smed_0075	argB	argB	argB	argB	argB	RL73_06690	mlr4826	argB	argB
rxn02465	N-acetyl-gamma-glutamyl-phosphate reductase	cpd02552_c0 (1) + cpd00005_c0 (1) ==> cpd00006_c0 (1) + cpd00918_c0 (1) + cpd00009_c0 (1)	n_acetylglutamyl_phosphate_c0 (1) + NADPH_c0 (1) ==> NADP_c0 (1) + 2_Acetamido_5_oxopentanoate_c0 (1) + Phosphate_c0 (1)	FALSE	R03443	1.2.1.38	smc01801	ArgC	Experimental	Díaz et al 2011; This study			Smed_0859	NGR_c10190	OV14_2277	argC	argC	argC	RL73_05855	mll8452	argC	noHit
rxn01637	N2_Acetyl_L_ornithine_2_oxoglutarate_aminotransferase_c0	cpd00024_c0 (1) + cpd00342_c0 (1) <==> cpd00918_c0 (1) + cpd00023_c0 (1)	2_Oxoglutarate_c0 (1) + N_Acetylornithine_c0 (1) <==> 2_Acetamido_5_oxopentanoate_c0 (1) + L_Glutamate_c0 (1)	TRUE	R02283	2.6.1.11	(smc02138 or smb21186 or smb20277 or smb20379 or smb20973 or smb20423)	(ArgD or Smb21186 or Smb20277 or Smb20379 or Smb20973 or Smb20423)	Experimental but incomplete	diCenzo and Finan 2015; This study	Mutation of argD prevents growth on minimal media only when pSymB is absent (diCenzo and Finan 2015; This study), consistent with argD having the annotated function and with at least one pSymB encoded protein having the same function		(Smed_0127 or Smed_4677 or Smed_3854 or Smed_3738 or noHit or Smed_3704)	(argD or NGR_b13670 or noHit or noHit or noHit or NGR_b23380)	(argD or OV14_a0504 or OV14_a0671 or OV14_a1582 or OV14_a1070 or OV14_b1405)	(gabT2 or goaG or noHit or noHit or noHit or opaC)	(argD1 or gabT or noHit or RHE_CH02145 or noHit or RHE_PF00202)	(argD or noHit or noHit or Atu3300 or noHit or bioA)	(RL73_00930 or noHit or noHit or noHit or noHit or noHit)	(mlr5646 or mlr5521 or mlr5990 or noHit or noHit or mll7127)	(argD or noHit or noHit or DK53_200 or noHit or noHit)	(argD or noHit or bll2910 or blr4134 or noHit or noHit)
rxn00469	Acetylornithine deacetylase	cpd00001_c0 (1) + cpd00342_c0 (1) <==> cpd00064_c0 (1) + cpd00029_c0 (1)	H2O_c0 (1) + N_Acetylornithine_c0 (1) <==> Ornithine_c0 (1) + Acetate_c0 (1)	TRUE	R00669	3.5.1.14	(sma1836 or smc00682 or smc02256 or smb21279)	(ArgE or HipO1 or HipO2 or Smb21279)	Experimental but incomplete	Hernández et al 2015	A double argE argJ mutant is not an arginine auxotroph, and each of HipO1, HipO2, and Smb21278 can catalyze this reaction in vitro (Hernández et al 2015). However, it is not known which gene(s) complement the argJ argE mutant in vivo.		(Smed_5605 or Smed_2573 or Smed_0172 or Smed_4612)	(NGR_b06380 or NGR_c27330 or NGR_c01920 or noHit)	(noHit or OV14_0150 or OV14_1489 or OV14_a0389)	(pRL120633 or RL4364 or pRL100225 or hipO)	(argE or hipO or RHE_PC00005 or RHE_CH03429)	(noHit or Atu3635 or hipO or Atu4428)	(noHit or RL73_03510 or noHit or noHit)	(mll7049 or mlr3583 or noHit or noHit)	(noHit or DK53_1955 or noHit or noHit)	(blr5449 or blr3021 or noHit or noHit)
rxn01636	Glutamate N-acetyltransferase	cpd00023_c0 (1) + cpd00342_c0 (1) <==> cpd00064_c0 (1) + cpd00477_c0 (1)	L_Glutamate_c0 (1) + N_Acetylornithine_c0 (1) <==> Ornithine_c0 (1) + N_Acetyl_L_glutamate_c0 (1)	TRUE	R02282	2.3.1.35	smc02450	ArgJ	Experimental	Hernández et al 2015			Smed_2516	argJ	argJ	argJ	argJ	argJ	RL73_01830	mll3461	argJ	argJ
rxn01019	Ornithine carbamoyltransferase	cpd00064_c0 (1) + cpd00146_c0 (1) ==> cpd00067_c0 (2) + cpd00009_c0 (1) + cpd00274_c0 (1)	Ornithine_c0 (1) + Carbamoylphosphate_c0 (1) ==> H_c0 (2) + Phosphate_c0 (1) + Citrulline_c0 (1)	FALSE	R01398	2.1.3.3	smc02137	ArgF1	Experimental	Kerppola and Kahn 1988b; This study			Smed_0128	argF	argF	argF	argF	argF	RL73_00925	mlr5647	argF	argF
rxn01434	Argininosuccinate synthase	cpd00002_c0 (1) + cpd00041_c0 (1) + cpd00274_c0 (1) <==> cpd00018_c0 (1) + cpd02152_c0 (1) + cpd00012_c0 (1)	ATP_c0 (1) + L_Aspartate_c0 (1) + Citrulline_c0 (1) <==> AMP_c0 (1) + L_Argininosuccinate_c0 (1) + PPi_c0 (1)	TRUE	R01954	6.3.4.5	smc03826	ArgG	Experimental	Kerppola and Kahn 1988b; This study			Smed_3063	argG	argG	argG	argG2	argG	RL73_05195	mlr4366	argG	noHit
rxn00802	Argininosuccinate lyase	cpd02152_c0 (1) <==> cpd00106_c0 (1) + cpd00051_c0 (1)	L_Argininosuccinate_c0 (1) <==> Fumarate_c0 (1) + L_Arginine_c0 (1)	TRUE	R01086	4.3.2.1	(smc00725 or smb21094)	(ArgH1 or ArgH2)	Experimental	diCenzo and Finan 2015; This study			(Smed_2536 or Smed_4987)	(argH or noHit)	(argH or noHit)	(argH or noHit)	(argH or noHit)	(argH or noHit)	(RL73_01220 or noHit)	(mlr3506 or noHit)	(argH or noHit)	(argH or noHit)
Glutamate, glutamine, aspartate, and asparagine biosynthesis
rxn02339	Aspartate transaminase	cpd00041_c0 (1) + cpd00024_c0 (1) <==> cpd00032_c0 (1) + cpd00023_c0 (1)	L_Aspartate_c0 (1) + 2_Oxoglutarate_c0 (1) <==> Oxaloacetate_c0 (1) + L_Glutamate_c0 (1)	TRUE	R00355	2.6.1.1	smc01578	AatA	Experimental but incomplete	This study	This Tn-seq data suggested that aatA encodes the primary, if not sole, aspartate aminotransferase involved in aspartate biosynthesis. However, in a different wild-type S. meliloti isolate, there appeared to be additional genes able to at least partially complement for mutations of aatA (Rastogi and Watson 1991, Watson and Rastogi 1993)		Smed_2233	aatA3	aatA3	aatA	aatAch	aatA	RL73_05850	mlr2541	DK53_1457	aatA
rxn00416	Asparagine synthase	cpd00002_c0 (1) + cpd00001_c0 (1) + cpd00041_c0 (1) + cpd00053_c0 (1) <==> cpd00018_c0 (1) + cpd00132_c0 (1) + cpd00012_c0 (1) + cpd00023_c0 (1)	ATP_c0 (1) + H2O_c0 (1) + L_Aspartate_c0 (1) + L_Glutamine_c0 (1) <==> AMP_c0 (1) + L_Asparagine_c0 (1) + PPi_c0 (1) + L_Glutamate_c0 (1)	TRUE	R00578	6.3.5.4	(smb20652 or UnknownC)	(AsnB or UnknownC)	Predicted		A strain lacking pSymA and pSymB (diCenzo et al 2014), and thus the asnB gene, is not an asparagine auxotroph, indicating either another enzyme encoded by the chromosome that catalyzes this reaction, or asparagine is synthesized by a different pathway in S. meliloti.		(Smed_4334 or UnknownC)	(NGR_b19210 or UnknownC)	(OV14_a0357 or UnknownC)	(noHit or UnknownC)	(noHit or UnknownC)	(noHit or UnknownC)	(noHit or UnknownC)	(mll6743 or UnknownC)	(noHit or UnknownC)	(asnB or UnknownC)
rxn00187	Glutamine synthetase	cpd00002_c0 (1) + cpd00013_c0 (1) + cpd00023_c0 (1) ==> cpd00067_c0 (1) + cpd00009_c0 (1) + cpd00053_c0 (1) + cpd00008_c0 (1)	ATP_c0 (1) + NH3_c0 (1) + L_Glutamate_c0 (1) ==> H_c0 (1) + Phosphate_c0 (1) + L_Glutamine_c0 (1) + ADP_c0 (1)	FALSE	R00253	6.3.1.2	(smc00948 or smb20745)	(GlnA or GlnII)	Experimental	De Bruijn et al 1989; This study			(Smed_1389 or Smed_4251)	(glnA3 or glnII)	(glnA3 or glnII)	(glnA or glnII)	(glnA2 or glnII)	(glnA or glnA)	(glnA or noHit)	(mll0343 or mlr0339)	(glnA or noHit)	(glnA or glnII)
rxn00085	Glutamate synthase (NADPH) (GOGAT)	cpd00006_c0 (1) + cpd00023_c0 (2) <==> cpd00067_c0 (1) + cpd00024_c0 (1) + cpd00053_c0 (1) + cpd00005_c0 (1)	NADP_c0 (1) + L_Glutamate_c0 (2) <==> H_c0 (1) + 2_Oxoglutarate_c0 (1) + L_Glutamine_c0 (1) + NADPH_c0 (1)	TRUE	R00114	1.4.1.13	(smc04026 and smc04028)	(GltD and GltB)	Experimental	Lewis et al 1990; This study			(Smed_2710 and Smed_2711)	(gltD and gltB1)	(gltD and gltB1)	(gltD and gltB)	(gltD and gltB)	(gltD and gltB)	(noHit and noHit)	(mll3029 and mll3030)	(gltD and DK53_3080)	(gltD and gltB)
Lysine biosynthesis
rxn00337	Aspartate kinase	cpd00067_c0 (1) + cpd00002_c0 (1) + cpd00041_c0 (1) <==> cpd01977_c0 (1) + cpd00008_c0 (1)	H_c0 (1) + ATP_c0 (1) + L_Aspartate_c0 (1) <==> 4_Phospho_L_aspartate_c0 (1) + ADP_c0 (1)	TRUE	R00480	2.7.2.4	smc02438	LysC	Experimental	This study			Smed_2504	lysC	lysC	aspC	lysC	lysC	RL73_01565	mll3437	DK53_1801	lysC
rxn01643	Aspartate-semialdehyde dehydrogenase	cpd01977_c0 (1) + cpd00005_c0 (1) ==> cpd00006_c0 (1) + cpd00346_c0 (1) + cpd00009_c0 (1)	4_Phospho_L_aspartate_c0 (1) + NADPH_c0 (1) ==> NADP_c0 (1) + L_Aspartate4_semialdehyde_c0 (1) + Phosphate_c0 (1)	FALSE	R02291	1.2.1.11	smc04410	Asd	Experimental	This study			Smed_3182	NGR_c33220	OV14_0847	asd	asd	asd	RL73_05320	mll4392	asd	asd
rxn01644	Dihydrodipicolinate synthase	cpd00346_c0 (1) + cpd00020_c0 (1) ==> cpd02120_c0 (1) + cpd00067_c0 (1) + cpd00001_c0 (2)	L_Aspartate4_semialdehyde_c0 (1) + Pyruvate_c0 (1) ==> Dihydrodipicolinate_c0 (1) + H_c0 (1) + H2O_c0 (2)	FALSE	R02292	4.2.1.52	smc02404	DapA1	Experimental	This study			Smed_0673	dapA	dapA	mosA	dapAch2	noHit	RL73_02875	mlr7746	dapA	dapA
rxn02929	Dihydrodipicolinate reductase	cpd00006_c0 (1) + cpd02465_c0 (1) <==> cpd02120_c0 (1) + cpd00067_c0 (1) + cpd00005_c0 (1)	NADP_c0 (1) + tetrahydrodipicolinate_c0 (1) <==> Dihydrodipicolinate_c0 (1) + H_c0 (1) + NADPH_c0 (1)	TRUE	R04199	1.3.1.26	smc02837	DapB	Experimental	This study			Smed_3371	dapB	dapB	dapB1	dapB1	dapB	noHit	mlr4642	dapB	dapB
rxn03031	2_3_4_5-tetrahydropyridine-2-carboxylate N-succinyltransferase	cpd00078_c0 (1) + cpd00001_c0 (1) + cpd02465_c0 (1) <==> cpd00010_c0 (1) + cpd02724_c0 (1)	Succinyl_CoA_c0 (1) + H2O_c0 (1) + tetrahydrodipicolinate_c0 (1) <==> CoA_c0 (1) + N_Succinyl_L_2_amino_6_oxopimelate_c0 (1)	TRUE	R04365	2.3.1.117	smc01732	DapD	Experimental	This study	This Tn-seq data was consistent with dapD encoding the primary enzyme catalyzing this reaction. However, unlike the othe lysine biosynthetic enzymes, dapD mutations did not appear to be absolutely lethal unless pSymA and pSymB were removed. Thus there may be an enzyme encoded by one of these replicons able to slightly complement dapD mutations.		Smed_0069	dapD	dapD	dapD	dapD	dapD	dapD	mlr4843	dapD	dapD
rxn03087	N_Succinyl_L_2_6_diaminoheptanedioate_2_ocoglytarate_c0	cpd00023_c0 (1) + cpd02724_c0 (1) ==> cpd02698_c0 (1) + cpd00024_c0 (1)	L_Glutamate_c0 (1) + N_Succinyl_L_2_amino_6_oxopimelate_c0 (1) ==> N_Succinyl_L_2_6_diaminopimelate_c0 (1) + 2_Oxoglutarate_c0 (1)	FALSE	R04475	2.6.1.17	UnknownC	UnknownC			It was predicted previously (Dunn 2015) that ArgD might perform this function in S. meliloti. However, our data was inconsistent with this hypothesis (Figure S14), and so the gene encoding the enzyme catalyzing this reaction remains unknown.
rxn01973	Succinyl-diaminopimelate desuccinylase	cpd02698_c0 (1) + cpd00001_c0 (1) <==> cpd00504_c0 (1) + cpd00036_c0 (1)	N_Succinyl_L_2_6_diaminopimelate_c0 (1) + H2O_c0 (1) <==> LL_2_6_Diaminopimelate_c0 (1) + Succinate_c0 (1)	TRUE	R02734	3.5.1.18	smc01096	DapE	Experimental	This study			Smed_0061	dapE	dapE	dapE	dapE2	dapE	RL73_00365	mlr4849	dapE	dapE
rxn01974	Diaminopimelate epimerase	cpd00504_c0 (1) <==> cpd00516_c0 (1)	LL_2_6_Diaminopimelate_c0 (1) <==> meso_2_6_Diaminopimelate_c0 (1)	TRUE	R02735	5.1.1.7	smc03856	DapF	Experimental	This study			Smed_3093	dapF	dapF	dapF	dapF	dapF	RL73_06400	mlr4318	dapF	dapF
rxn00313	Diaminopimelate decarboxylase (DAP decarboxylate)	cpd00067_c0 (1) + cpd00516_c0 (1) ==> cpd00011_c0 (1) + cpd00039_c0 (1)	H_c0 (1) + meso_2_6_Diaminopimelate_c0 (1) ==> CO2_c0 (1) + L_Lysine_c0 (1)	FALSE	R00451	4.1.1.20	smc00723	LysA	Experimental	This study			Smed_2538	NGR_c26960	OV14_0112	lysA	lysA	lysA	RL73_01215	mlr3508	lysA	lysA
Threonine biosynthesis
rxn01301	Homoserine dehydrogenase	cpd00003_c0 (1) + cpd00227_c0 (1) <==> cpd00067_c0 (1) + cpd00346_c0 (1) + cpd00004_c0 (1)	NAD_c0 (1) + L_Homoserine_c0 (1) <==> H_c0 (1) + L_Aspartate4_semialdehyde_c0 (1) + NADH_c0 (1)	TRUE	R01773	1.1.1.3	smc00293	ThrA	Experimental	This study			Smed_1453	thrA	thrA	hom1	thrA	hom	RL73_02340	mll0934	DK53_1253	hom
rxn01300	Homoserine kinase type II	cpd00002_c0 (1) + cpd00227_c0 (1) <==> cpd00809_c0 (1) + cpd00008_c0 (1)	ATP_c0 (1) + L_Homoserine_c0 (1) <==> O_Phospho_L_homoserine_c0 (1) + ADP_c0 (1)	TRUE	R01771	2.7.1.39	smc00017	ThrB	Experimental	This study			Smed_0528	thrB	thrB	thrB	thrB	thrB	RL73_00275	mlr7503	thrB	thrB
rxn01069	Threonine synthase	cpd00001_c0 (1) + cpd00809_c0 (1) ==> cpd00161_c0 (1) + cpd00067_c0 (1) + cpd00009_c0 (1)	H2O_c0 (1) + O_Phospho_L_homoserine_c0 (1) ==> L_Threonine_c0 (1) + H_c0 (1) + Phosphate_c0 (1)	FALSE	R01466	4.2.99.2	smc00077	ThrC1	Experimental	This study			Smed_0536	thrC	thrC	thrC	thrC	thrC	RL73_00665	mll7517	thrC	thrC
Cysteine biosynthesis
rxn00423	serine O-acetyltransferase	cpd00054_c0 (1) + cpd00022_c0 (1) ==> cpd00010_c0 (1) + cpd00722_c0 (1)	L_Serine_c0 (1) + Acetyl_CoA_c0 (1) ==> CoA_c0 (1) + O_Acetyl_L_serine_c0 (1)	FALSE	R00586	2.3.1.30	smc02113	CysE	Experimental	This study			Smed_1113	cysE	cysE	cysE1	cysE1	cysE	noHit	mlr0175	cysE	cysE
rxn00649	Cysteine synthase	cpd00239_c0 (1) + cpd00722_c0 (1) ==> cpd00067_c0 (1) + cpd00084_c0 (1) + cpd00029_c0 (1)	H2S_c0 (1) + O_Acetyl_L_serine_c0 (1) ==> H_c0 (1) + L_Cysteine_c0 (1) + Acetate_c0 (1)	FALSE	R00897	2.5.1.47	(smc00421 or smc01174)	(CysK1 or CysK2)	Predicted		Mutation of neither cysK1 or cysK2 appeared to result in cysteine auxotrophy in this Tn-seq data, suggesting both have this activity (and possibly other genes)		(Smed_3549 or Smed_1363)	(cysK1 or cysK2)	(cysK1 or cysK2)	(cysK or cysB)	(cysK1 or cysK2)	(cysK or cysK)	(RL73_03070 or noHit)	(mll4616 or mlr0353)	(noHit or DK53_1039)	(cysK or cysK)
rxn09240	Sulfate_adenyltransferase_c0	cpd00002_c0 (1) + cpd00048_c0 (1) + cpd00001_c0 (1) + cpd00038_c0 (1) <==> cpd00193_c0 (1) + cpd00009_c0 (1) + cpd00012_c0 (1) + cpd00031_c0 (1)	ATP_c0 (1) + Sulfate_c0 (1) + H2O_c0 (1) + GTP_c0 (1) <==> APS_c0 (1) + Phosphate_c0 (1) + PPi_c0 (1) + GDP_c0 (1)	TRUE	R00529	2.7.7.4	(smc00091 and smc00090)	(CysD and CysN)	Experimental	Abola et al 1999; This study	Based on this Tn-seq data, a few insertions within the cysN gene can be isolated and this is mainly dependent on the presence of pSymA and pSymB. Likely, a little bit of activity of the pSymA encoded NodP and NodQ genes (there are two copies of each gene) allow for this.		(Smed_0558 and Smed_0557)	(cysD and cysN)	(cysD and cysN)	(cysD and cysN)	(cysD and cysN)	(Atu0817 and cysN)	(noHit and noHit)	(noHit and noHit)	(noHit and noHit)	(noHit and noHit)
rxn05239	adenosine_5_phosphate_sulfite_oxidized_thioredoxin_oxidoreductase_c0	cpd00193_c0 (1) + cpd11421_c0 (1) ==> cpd11420_c0 (1) + cpd00018_c0 (1) + cpd00081_c0 (1)	APS_c0 (1) + trdrd_c0 (1) ==> trdox_c0 (1) + AMP_c0 (1) + Sulfite_c0 (1)	FALSE	R02021	1.8.4.8	smc00092	CysH	Experimental	Abola et al 1999; This study			Smed_0559	cysH	cysH	RL1262	cysH	cysH	noHit	mll3228	cysH	cysH
rxn00623	hydrogen_sulfide_NADP_oxidoreductase_c0	cpd00006_c0 (3) + cpd00001_c0 (3) + cpd00239_c0 (1) <==> cpd00067_c0 (4) + cpd00081_c0 (1) + cpd00005_c0 (3)	NADP_c0 (3) + H2O_c0 (3) + H2S_c0 (1) <==> H_c0 (4) + Sulfite_c0 (1) + NADPH_c0 (3)	TRUE	R00858	1.8.1.2	smc02124	CysI	Experimental	Abbas et al 2002; This study			Smed_1101	NGR_c13070	OV14_2544	cysI	cysI	cysI	noHit	mll3230	DK53_191	blr1479
Methionine biosynthesis
rxn01304	Homoserine O-succinyltransferase	cpd00078_c0 (1) + cpd00227_c0 (1) ==> cpd00010_c0 (1) + cpd00822_c0 (1)	Succinyl_CoA_c0 (1) + L_Homoserine_c0 (1) ==> CoA_c0 (1) + O_Succinyl_L_homoserine_c0 (1)	FALSE	R01777	2.3.1.46	smc03797	MetA	Experimental	This study			Smed_3030	metA	metA	metA	metA	metA	noHit	noHit	metA	noHit
rxn05957	O-succinylhomoserine sulfhydrylase	cpd00239_c0 (1) + cpd00822_c0 (1) ==> cpd00067_c0 (1) + cpd00036_c0 (1) + cpd00135_c0 (1)	H2S_c0 (1) + O_Succinyl_L_homoserine_c0 (1) ==> H_c0 (1) + Succinate_c0 (1) + Homocysteine_c0 (1)	FALSE	R01288	2.5.1.48	smc02217	MetZ	Experimental	This study			Smed_0133	metZ	metZ	metZ	metZ	Atu0432	noHit	mll5651	metZ	metZ
rxn00693	B12-dependent methionine synthase	cpd00345_c0 (1) + cpd00135_c0 (1) <==> cpd00060_c0 (1) + cpd00087_c0 (1)	5_Methyltetrahydrofolate_c0 (1) + Homocysteine_c0 (1) <==> L_Methionine_c0 (1) + Tetrahydrofolate_c0 (1)	TRUE	R00946	2.1.1.14	smc03112	MetH	Experimental	Taga and Walker 2010; This study			Smed_2870	metH	metH	metH	metH	metH	noHit	noHit	metH	metH
Histidine biosynthesis
rxn00770	Ribose-phosphate pyrophosphokinase	cpd00002_c0 (1) + cpd00101_c0 (1) <==> cpd00018_c0 (1) + cpd00103_c0 (1)	ATP_c0 (1) + ribose_5_phosphate_c0 (1) <==> AMP_c0 (1) + PRPP_c0 (1)	TRUE	R01049	2.7.6.1	smc02686	Prs	Experimental	This study			Smed_2257	prsA	prsA	prs	prsAch	prsA	RL73_06255	mlr2685	prs	prsA
rxn00789	ATP phosphoribosyltransferase	cpd00002_c0 (1) + cpd00103_c0 (1) ==> cpd00012_c0 (1) + cpd01775_c0 (1)	ATP_c0 (1) + PRPP_c0 (1) ==> PPi_c0 (1) + Phosphoribosyl_ATP_c0 (1)	FALSE	R01071	2.4.2.17	(smc00917 and smc00918)	(HisG and HisZ)	Experimental	This study			(Smed_0405 and Smed_0404)	(hisG and NGR_c04020)	(hisG and OV14_1716)	(hisG and hisZ)	(hisG and hisZ)	(hisG and hisS-2)	(hisG and hisZ)	(mlr6931 and mlr6929)	(hisG and DK53_2955)	(hisG and hisZ)
rxn02834	Phosphoribosyl-ATP pyrophosphatase	cpd00001_c0 (1) + cpd01775_c0 (1) ==> cpd01777_c0 (1) + cpd00012_c0 (1)	H2O_c0 (1) + Phosphoribosyl_ATP_c0 (1) ==> Phosphoribosyl_AMP_c0 (1) + PPi_c0 (1)	FALSE	R04035	3.6.1.31	smc02568	HisE	Experimental	This study			Smed_3258	hisE	hisE	RL0041	hisE	hisE	RL73_00055	mlr5018	hisE	hisE
rxn02835	Phosphoribosyl-AMP cyclohydrolase	cpd00001_c0 (1) + cpd01777_c0 (1) <==> cpd02979_c0 (1)	H2O_c0 (1) + Phosphoribosyl_AMP_c0 (1) <==> phosphoribosylformiminoaicar_phosphate_c0 (1)	TRUE	R04037	3.5.4.19	smc01004	HisI	Experimental	This study			Smed_1048	hisI	hisI	hisI	hisI	hisI	RL73_05295	mlr0923	DK53_1064	hisI
rxn03175	Phosphoribosylformimino-5-aminoimidazole carboxamide ribotide isomerase	cpd02979_c0 (1) <==> cpd02991_c0 (1)	phosphoribosylformiminoaicar_phosphate_c0 (1) <==> phosphoribulosylformimino_AICAR_phosphate_c0 (1)	TRUE	R04640	5.3.1.16	smc02570	HisA	Experimental	This study			Smed_3260	hisA	hisA	hisA	hisA	hisA	RL73_00045	mlr5014	hisA	hisA
rxn03135	imidazole glycerol phosphate	cpd02991_c0 (1) + cpd00053_c0 (1) ==> cpd00067_c0 (1) + cpd02851_c0 (1) + cpd00023_c0 (1) + cpd02843_c0 (1)	phosphoribulosylformimino_AICAR_phosphate_c0 (1) + L_Glutamine_c0 (1) ==> H_c0 (1) + AICAR_c0 (1) + L_Glutamate_c0 (1) + D_erythro_imidazol_glycerol_phosphate_c0 (1)	FALSE	R04558	4.1.3- and 2.4.2.-	(smc02569 and smc02572)	(HisF and HisH)	Experimental	This study			(Smed_3259 and Smed_3261)	(hisF and hisH)	(hisF and hisH)	(hisF and hisH)	(hisF and hisH)	(hisF and hisH)	(RL73_00050 and RL73_00040)	(mlr5016 and mlr5011)	(hisF and hisH)	(hisF and hisH)
rxn02473	Imidazoleglycerol-phosphate dehydratase	cpd02843_c0 (1) ==> cpd00930_c0 (1) + cpd00001_c0 (1)	D_erythro_imidazol_glycerol_phosphate_c0 (1) ==> imidazole_acetol_phosphate_c0 (1) + H2O_c0 (1)	FALSE	R03457	4.2.1.19	smc02574	HisB	Experimental	This study			Smed_3263	hisB	hisB	hisB	hisB	hisB	RL73_00035	mlr5008	DK53_2000	hisB
rxn02320	Histidinol-phosphate aminotransferase	cpd00807_c0 (1) + cpd00024_c0 (1) <==> cpd00930_c0 (1) + cpd00023_c0 (1)	L_histidinol_phosphate_c0 (1) + 2_Oxoglutarate_c0 (1) <==> imidazole_acetol_phosphate_c0 (1) + L_Glutamate_c0 (1)	TRUE	R03243	2.6.1.9	(smc02393 or smc00710 or sma0387 or smc03885)	(HisC4 or HisC1 or HisC3 or HisC2)	Predicted		Based on this Tn-seq data, mutation of any of the chromosomal genes does not result in histidine auxotrophy regardless of whether pSymA and pSymB are present. Therefore, it is likely that at least two chromosomal copies are active, if not all four versions of this protein.		(Smed_0665 or Smed_2550 or Smed_6316 or Smed_3123)	(NGR_c08100 or hisC1 or noHit or hisC2)	(OV14_2075 or hisC1 or noHit or hisC2)	(hisC3 or hisC1 or noHit or hisC2)	(hisCch1 or hisCch2 or noHit or hisCch3)	(hisC or hisC or noHit or noHit)	(noHit or RL73_05705 or noHit or noHit)	(mll7737 or mll3536 or mll7105 or mlr5786)	(DK53_648 or hisC or noHit or noHit)	(noHit or hisC or noHit or hisC)
rxn02160	L-Histidinol-phosphate phosphohydrolase	cpd00001_c0 (1) + cpd00807_c0 (1) ==> cpd00641_c0 (1) + cpd00067_c0 (1) + cpd00009_c0 (1)	H2O_c0 (1) + L_histidinol_phosphate_c0 (1) ==> L_Histidinol_c0 (1) + H_c0 (1) + Phosphate_c0 (1)	FALSE	R03013	3.1.3.15	smc04042	Smc04042	Experimental but incomplete	This study	It was previously noted (Dunn 2015) that rhizobia lack the classical enzyme catalyzing this reaction and that the HisB ezymes of rhizobia are unlikely to be bifunctional and also perform this role. Instead, it was hypothesized that an inositol monophosphatase family protein could fulfil this function (Dunn 2015). As Smc04042 is an inositol monophosphatase family protein that was essential in this…		Smed_2717	NGR_c28730	OV14_0316	RL4091	RHE_CH03573	Atu3885	RL73_05650	mll3039	hisN	blr7731
rxn02159	Histidinol dehydrogenase	cpd00641_c0 (1) + cpd00003_c0 (1) <==> cpd01324_c0 (1) + cpd00067_c0 (1) + cpd00004_c0 (1)	L_Histidinol_c0 (1) + NAD_c0 (1) <==> L_Histidinal_c0 (1) + H_c0 (1) + NADH_c0 (1)	TRUE	R03012	1.1.1.23	smc02307	HisD	Experimental	This study			Smed_0208	hisD2	hisD2	hisD1	hisD	hisD	RL73_05045	mll6456	hisD	hisD
rxn00863	Histidinal dehydrogenase	cpd01324_c0 (1) + cpd00001_c0 (1) + cpd00003_c0 (1) ==> cpd00067_c0 (2) + cpd00119_c0 (1) + cpd00004_c0 (1)	L_Histidinal_c0 (1) + H2O_c0 (1) + NAD_c0 (1) ==> H_c0 (2) + L_Histidine_c0 (1) + NADH_c0 (1)	FALSE	R01163	1.1.1.23	smc02307	HisD	Experimental	This study			Smed_0208	hisD2	hisD2	hisD1	hisD	hisD	RL73_05045	mll6456	hisD	hisD
Tryptophan, tyrosine, phenylalanine biosynthesis
rxn01332	DAHP synthetase	cpd00236_c0 (1) + cpd00001_c0 (1) + cpd00061_c0 (1) ==> cpd02857_c0 (1) + cpd00067_c0 (1) + cpd00009_c0 (1)	D_Erythrose4_phosphate_c0 (1) + H2O_c0 (1) + Phosphoenolpyruvate_c0 (1) ==> DAHP_c0 (1) + H_c0 (1) + Phosphate_c0 (1)	FALSE	R01826	2.5.1.54	smc00155	AroF	Experimental	This study			Smed_1570	NGR_c16990	OV14_3040	RL2692	aroF	dhs	RL73_03760	mll0826	DK53_1000	blr3778
rxn02212	3-dehydroquinate synthase	cpd02857_c0 (1) ==> cpd00067_c0 (1) + cpd00699_c0 (1) + cpd00009_c0 (1)	DAHP_c0 (1) ==> H_c0 (1) + 5_Dehydroquinate_c0 (1) + Phosphate_c0 (1)	FALSE	R03083	4.6.1.3	smc00696	AroB	Experimental	This study			Smed_2564	aroB	aroB	aroB	aroB	aroB	RL73_05740	mll3571	aroB	aroB
rxn02213	3-dehydroquinate dehydratase	cpd00699_c0 (1) ==> cpd00001_c0 (1) + cpd01716_c0 (1)	5_Dehydroquinate_c0 (1) ==> H2O_c0 (1) + 3_Dehydroshikimate_c0 (1)	FALSE	R03084	4.2.1.10	smc01343	AroQ	Experimental	This study			Smed_0954	aroQ2	aroQ2	RL2090	aroQ1	aroQ	RL73_00280	mll0207	aroQ	aroQ
rxn01740	Shikimate 5-dehydrogenase	cpd00006_c0 (1) + cpd00383_c0 (1) <==> cpd00067_c0 (1) + cpd01716_c0 (1) + cpd00005_c0 (1)	NADP_c0 (1) + Shikimate_c0 (1) <==> H_c0 (1) + 3_Dehydroshikimate_c0 (1) + NADPH_c0 (1)	TRUE	R02413	1.1.1.25	smc02791	AroE1	Experimental	This study			Smed_3211	aroE	aroE	RL0003	aroEch1	aroE	RL73_00160	mlr4492	aroE	aroE
rxn01739	Shikimate kinase	cpd00002_c0 (1) + cpd00383_c0 (1) <==> cpd02030_c0 (1) + cpd00008_c0 (1)	ATP_c0 (1) + Shikimate_c0 (1) <==> 3_phosphoshikimate_c0 (1) + ADP_c0 (1)	TRUE	R02412	2.7.1.71	smc00695	AroK	Experimental	This study			Smed_2565	NGR_c27230	OV14_0139	aroK	aroK	aroK	RL73_05745	mll3573	DK53_1946	bll0188
rxn02476	3-phosphoshikimate 1-carboxyvinyltransferase	cpd02030_c0 (1) + cpd00061_c0 (1) <==> cpd00932_c0 (1) + cpd00067_c0 (1) + cpd00009_c0 (1)	3_phosphoshikimate_c0 (1) + Phosphoenolpyruvate_c0 (1) <==> 5_O__1_Carboxyvinyl_3_phosphoshikimate_c0 (1) + H_c0 (1) + Phosphate_c0 (1)	TRUE	R03460	2.5.1.19	smc00333	AroA	Experimental	This study			Smed_3456	aroA	noHit	aroA1	noHit	noHit	RL73_00725	mll5213	aroA	aroA
rxn01255	Chorismate synthase	cpd00932_c0 (1) ==> cpd00067_c0 (1) + cpd00009_c0 (1) + cpd00216_c0 (1)	5_O__1_Carboxyvinyl_3_phosphoshikimate_c0 (1) ==> H_c0 (1) + Phosphate_c0 (1) + Chorismate_c0 (1)	FALSE	R01714	4.2.3.5	smc00007	AroC	Experimental	This study			Smed_0515	aroC	aroC	aroC	aroC	aroC	RL73_01290	mlr7461	aroC	aroC
rxn00726	Anthranilate synthase	cpd00013_c0 (1) + cpd00216_c0 (1) ==> cpd00067_c0 (1) + cpd00020_c0 (1) + cpd00001_c0 (1) + cpd00093_c0 (1)	NH3_c0 (1) + Chorismate_c0 (1) ==> H_c0 (1) + Pyruvate_c0 (1) + H2O_c0 (1) + Anthranilate_c0 (1)	FALSE	R00985	4.1.3.27	smc02725	TrpE	Experimental	Barsomian et al 1992; This study			Smed_2295	trpE	trpE	trpE	trpE	trpE(G)	noHit	mlr2774	DK53_1524	trpE
rxn00791	Anthranilate phosphoribosyltransferase	cpd00093_c0 (1) + cpd00103_c0 (1) ==> cpd02642_c0 (1) + cpd00012_c0 (1)	Anthranilate_c0 (1) + PRPP_c0 (1) ==> N_5_phosphoribosyl_anthranilate_c0 (1) + PPi_c0 (1)	FALSE	R01073	2.4.2.18	smc00235	TrpD	Experimental	Barsomian et al 1992; This study			Smed_1408	trpD	trpD	trpD	trpD	trpD	RL73_06625	mlr0614	trpD	trpD
rxn02508	Phosphoribosylanthranilate isomerase	cpd02642_c0 (1) <==> cpd00956_c0 (1)	N_5_phosphoribosyl_anthranilate_c0 (1) <==> 1_2_carboxyphenylamino_1_deoxyribulose_5_phosphate_c0 (1)	TRUE	R03509	5.3.1.24	smc02767	TrpF	Experimental	Barsomian et al 1992; This study			Smed_3236	trpF	trpF	RL0020	trpF	trpF	noHit	mlr5070	DK53_2027	trpF
rxn02507	Indole-3-glycerol phosphate synthase	cpd00067_c0 (1) + cpd00956_c0 (1) ==> cpd02210_c0 (1) + cpd00001_c0 (1) + cpd00011_c0 (1)	H_c0 (1) + 1_2_carboxyphenylamino_1_deoxyribulose_5_phosphate_c0 (1) ==> Indoleglycerol_phosphate_c0 (1) + H2O_c0 (1) + CO2_c0 (1)	FALSE	R03508	4.1.1.48	smc00236	TrpC	Experimental	Barsomian et al 1992; This study			Smed_1409	trpC	trpC	trpC	trpC	trpC	noHit	mlr0615	DK53_1130	trpC
rxn01964	L-serine hydrolase	cpd02210_c0 (1) + cpd00054_c0 (1) ==> cpd00065_c0 (1) + cpd00102_c0 (1) + cpd00001_c0 (1)	Indoleglycerol_phosphate_c0 (1) + L_Serine_c0 (1) ==> L_Tryptophan_c0 (1) + Glyceraldehyde3_phosphate_c0 (1) + H2O_c0 (1)	FALSE	R02722	4.2.1.20	(smc02765 and smc02766)	(TrpA and TrpB)	Experimental	Barsomian et al 1992; This study			(Smed_3238 and Smed_3237)	(trpA and trpB)	(trpA and trpB)	(trpA and trpB)	(trpA and trpB)	(trpA and trpB)	(RL73_06610 and noHit)	(mlr5073 and mlr5071)	(trpA and trpB)	(trpA and trpB)
rxn01256	Chorismate pyruvatemutase	cpd00216_c0 (1) ==> cpd00219_c0 (1)	Chorismate_c0 (1) ==> Prephenate_c0 (1)	FALSE	R01715	5.4.99.5	smc03858	PheAa	Experimental	This study			Smed_3096	NGR_c32240	OV14_0733	RL4548	tyrA	tyrA	noHit	mlr4380	DK53_1755	noHit
rxn01000	Prephenate dehydratase	cpd00219_c0 (1) + cpd00067_c0 (1) ==> cpd00001_c0 (1) + cpd00011_c0 (1) + cpd00143_c0 (1)	Prephenate_c0 (1) + H_c0 (1) ==> H2O_c0 (1) + CO2_c0 (1) + Phenylpyruvate_c0 (1)	FALSE	R01373	4.2.1.91	smc02899	PheA	Experimental	Pobigaylo et al 2006; This study			Smed_3428	pheA	pheA	RL0139	pheA	pheA	RL73_00450	mlr5498	DK53_54	pheA
rxn00493	Phenylalanine transaminase	cpd00066_c0 (1) + cpd00024_c0 (1) <==> cpd00143_c0 (1) + cpd00023_c0 (1)	L_Phenylalanine_c0 (1) + 2_Oxoglutarate_c0 (1) <==> Phenylpyruvate_c0 (1) + L_Glutamate_c0 (1)	TRUE	R00694	2.6.1.58	(smc02393 or smc00710 or sma0387 or smc03885)	(HisC4 or HisC1 or HisC3 or HisC2)	Predicted	Dunn 2015	Based on this Tn-seq data, mutation of any of the chromosomal genes does not result in auxotrophy regardless of whether pSymA and pSymB are present. Therefore, it is likely that at least two chromosomal copies are active, if not all four versions of this protein.		(Smed_0665 or Smed_2550 or Smed_6316 or Smed_3123)	(NGR_c08100 or hisC1 or noHit or hisC2)	(OV14_2075 or hisC1 or noHit or hisC2)	(hisC3 or hisC1 or noHit or hisC2)	(hisCch1 or hisCch2 or noHit or hisCch3)	(hisC or hisC or noHit or noHit)	(noHit or RL73_05705 or noHit or noHit)	(mll7737 or mll3536 or mll7105 or mlr5786)	(DK53_648 or hisC or noHit or noHit)	(noHit or hisC or noHit or hisC)
rxn01269	Prephenate dehydrogenase	cpd00219_c0 (1) + cpd00006_c0 (1) ==> cpd00868_c0 (1) + cpd00011_c0 (1) + cpd00005_c0 (1)	Prephenate_c0 (1) + NADP_c0 (1) ==> p_hydroxyphenylpyruvate_c0 (1) + CO2_c0 (1) + NADPH_c0 (1)	FALSE	R01730	1.3.1.12	smc00711	TyrC	Experimental	This study			Smed_2549	tyrC	tyrC	tyrC	tyrC	tyrC	RL73_05700	mll3535	DK53_1910	tyrC
rxn00527	Tyrosine transaminase	cpd00024_c0 (1) + cpd00069_c0 (1) <==> cpd00868_c0 (1) + cpd00023_c0 (1)	2_Oxoglutarate_c0 (1) + L_Tyrosine_c0 (1) <==> p_hydroxyphenylpyruvate_c0 (1) + L_Glutamate_c0 (1)	TRUE	R00734	2.6.1.57	(smc04326 or smc01578 or smc00294 or smc00387 or smc02262 or smb20039 or smc01969 or smc04386 or smc03885 or smc02393 or smc00710 or sma0387)	(Smc04326 or AatA or Smc00294 or TatA or Smc02262 or Smb20039 or Smc01969 or AatB or HisC2 or HisC4 or HisC1 or HisC3)	Predicted	Dunn 2015	No mutation of any one of the listed genes appeared to result in tyrosine auxotrophy in this Tn-seq data, suggesting that at least two enzymes must have this function. While aatA mutations did appear to result in auxotrophy, this was likely due to AatA being involved in asparate biosynthesis.		(noHit or Smed_2233 or Smed_1454 or Smed_3509 or Smed_0178 or Smed_4096 or Smed_2412 or Smed_3160 or Smed_3123 or Smed_0665 or Smed_2550 or Smed_6316)	(noHit or aatA3 or aatC or NGR_c36470 or NGR_c01980 or NGR_b00120 or NGR_c25390 or attA1 or hisC2 or NGR_c08100 or hisC1 or noHit)	(OV14_3206 or aatA3 or aatC or OV14_1191 or OV14_1495 or OV14_a0218 or OV14_4067 or attA1 or hisC2 or OV14_2075 or hisC1 or noHit)	(noHit or aatA or RL2096 or pRL100056 or noHit or RL3118 or pRL100365 or noHit or hisC2 or hisC3 or hisC1 or noHit)	(noHit or aatAch or aatCch or RHE_PF00273 or noHit or RHE_CH02666 or noHit or noHit or hisCch3 or hisCch1 or hisCch2 or noHit)	(noHit or aatA or Atu1589 or noHit or noHit or Atu0235 or noHit or noHit or noHit or hisC or hisC or noHit)	(noHit or RL73_05850 or RL73_02335 or noHit or noHit or noHit or noHit or noHit or noHit or noHit or RL73_05705 or noHit)	(mlr4213 or mlr2541 or mll0935 or mll0405 or mlr1282 or mlr1139 or noHit or noHit or mlr5786 or mll7737 or mll3536 or mll7105)	(noHit or DK53_1457 or DK53_1254 or noHit or noHit or DK53_1822 or noHit or noHit or noHit or DK53_648 or hisC or noHit)	(noHit or aatA or blr4361 or noHit or noHit or blr0404 or noHit or noHit or hisC or noHit or hisC or noHit)
rxn05036	Prephenate transaminase	cpd00024_c0 (1) + cpd00616_c0 (1) <==> cpd00219_c0 (1) + cpd00023_c0 (1)	2_Oxoglutarate_c0 (1) + Pretyrosine_c0 (1) <==> Prephenate_c0 (1) + L_Glutamate_c0 (1)	TRUE	R07276	2.6.1.79	(smc04326 or smc01578 or smc00294 or smc00387 or smc02262 or smb20039 or smc01969 or smc04386)	(Smc04326 or AatA or Smc00294 or TatA or Smc02262 or Smb20039 or Smc01969 or AatB)	Predicted	Dunn 2015	No mutation of any one of the listed genes appeared to result in tyrosine auxotrophy in this Tn-seq data, suggesting that at least two enzymes must have this function. While aatA mutations did appear to result in auxotrophy, this was likely due to AatA being involved in asparate biosynthesis.		(noHit or Smed_2233 or Smed_1454 or Smed_3509 or Smed_0178 or Smed_4096 or Smed_2412 or Smed_3160)	(noHit or aatA3 or aatC or NGR_c36470 or NGR_c01980 or NGR_b00120 or NGR_c25390 or attA1)	(OV14_3206 or aatA3 or aatC or OV14_1191 or OV14_1495 or OV14_a0218 or OV14_4067 or attA1)	(noHit or aatA or RL2096 or pRL100056 or noHit or RL3118 or pRL100365 or noHit)	(noHit or aatAch or aatCch or RHE_PF00273 or noHit or RHE_CH02666 or noHit or noHit)	(noHit or aatA or Atu1589 or noHit or noHit or Atu0235 or noHit or noHit)	(noHit or RL73_05850 or RL73_02335 or noHit or noHit or noHit or noHit or noHit)	(mlr4213 or mlr2541 or mll0935 or mll0405 or mlr1282 or mlr1139 or noHit or noHit)	(noHit or DK53_1457 or DK53_1254 or noHit or noHit or DK53_1822 or noHit or noHit)	(noHit or aatA or blr4361 or noHit or noHit or blr0404 or noHit or noHit)
rxn00525	L-argonate oxioreductase	cpd00003_c0 (1) + cpd00616_c0 (1) ==> cpd00004_c0 (1) + cpd00011_c0 (1) + cpd00069_c0 (1)	NAD_c0 (1) + Pretyrosine_c0 (1) ==> NADH_c0 (1) + CO2_c0 (1) + L_Tyrosine_c0 (1)	FALSE	R00732	1.3.1.43	smc00711	TyrC	Experimental	This study			Smed_2549	tyrC	tyrC	tyrC	tyrC	tyrC	RL73_05700	mll3535	DK53_1910	tyrC
Alanine biosynthesis
rxn00278	Alanine dehydrogenase	cpd00001_c0 (1) + cpd00003_c0 (1) + cpd00035_c0 (1) <==> cpd00067_c0 (1) + cpd00020_c0 (1) + cpd00013_c0 (1) + cpd00004_c0 (1)	H2O_c0 (1) + NAD_c0 (1) + L_Alanine_c0 (1) <==> H_c0 (1) + Pyruvate_c0 (1) + NH3_c0 (1) + NADH_c0 (1)	TRUE	R00396	1.4.1.1	(smc01169 or Unknown)	(Ald or Unknown)	Predicted		Mutation of ald did not appear to result in alanine auxotrophy in this Tn-seq data. This suggests that either an alternate alanine dehydrogenase exists, or L-alanine is produce through an alternate route. Therefore, Unknowns have been included with this reaction, and an alternate pathway through D-alanine has also been added (see rxns rnx00849 and rxn00283).		(Smed_1368 or Unknown)	(NGR_c14930 or Unknown)	(OV14_2810 or Unknown)	(aldA or Unknown)	(aldA or Unknown)	(noHit or Unknown)	(noHit or Unknown)	(mll9089 or Unknown)	(noHit or Unknown)	(blr3179 or Unknown)
rxn00849	D-alanine transaminase	cpd00024_c0 (1) + cpd00117_c0 (1) <==> cpd00186_c0 (1) + cpd00020_c0 (1)	2_Oxoglutarate_c0 (1) + D_Alanine_c0 (1) <==> D_Glutamate_c0 (1) + Pyruvate_c0 (1)	TRUE	R01148	2.6.1.21	(sma0093 or smc01047)	(Sma0093 or Smc01047)	Predicted				(Smed_5171 or Smed_1094)	(noHit or NGR_c13000)	(OV14_a0195 or OV14_2537)	(noHit or RL2283)	(noHit or RHE_CH01953)	(dat or noHit)	(noHit or noHit)	(noHit or mlr0401)	(DK53_2304 or noHit)	(bll7596 or noHit)
rxn00283	L-alanine racemase	cpd00035_c0 (1) <==> cpd00117_c0 (1)	L_Alanine_c0 (1) <==> D_Alanine_c0 (1)	TRUE	R00401	5.1.1.1	smc00557	Alr	Predicted				Smed_0730	NGR_c08780	OV14_2147	RL1550	alr	alr	RL73_01755	mll3997	alr	alr
Valine, leucine, isoleucine biosynthesis
rxn00737	Threonine dehydratase	cpd00161_c0 (1) ==> cpd00013_c0 (1) + cpd00094_c0 (1)	L_Threonine_c0 (1) ==> NH3_c0 (1) + 2_Oxobutyrate_c0 (1)	FALSE	R00996	4.3.1.19	smc00936	IlvA	Predicted		ilvA did not appear to be essential for branched chain amino acid metabolism in this Tn-seq data, which may be due to a bypass through rxn02302		Smed_1373	ilvA2	ilvA2	ilvA1	ilvA	ilvA	noHit	mlr0162	ilvA	noHit
rxn02302	O-Acetyl-L-homoserine succinate-lyase	cpd00001_c0 (1) + cpd00822_c0 (1) ==> cpd00067_c0 (1) + cpd00036_c0 (1) + cpd00013_c0 (1) + cpd00094_c0 (1)	H2O_c0 (1) + O_Succinyl_L_homoserine_c0 (1) ==> H_c0 (1) + Succinate_c0 (1) + NH3_c0 (1) + 2_Oxobutyrate_c0 (1)	FALSE	R00999	2.5.1.48	(smc02595 and smc01976)	(MetB or Smc01976)	Predicted				(Smed_4014 and Smed_2419)	(noHit and mdeA)	(metZ and mdeA)	(noHit and pRL110363)	(noHit and mdeAe)	(noHit and mdeA)	(RL73_00495 and noHit)	(mll4503 and mll0856)	(noHit and noHit)	(noHit and noHit)
rxn03194	(S)-2-aceto-2-hydroxybutanoate synthase	cpd03049b_c0 (1) + cpd00094_c0 (1) <==> cpd00498_c0 (1) + cpd00056_c0 (1)	2_Hydroxyethyl_ThPP_branched chain aa synthesis_c0 (1) + 2_Oxobutyrate_c0 (1) <==> 2_Aceto_2_hydroxybutanoate_c0 (1) + TPP_c0 (1)	TRUE	R04673	2.2.1.6	(smc01431 and (smc01430 or NonEssential))	(IlvI and (IlvH or NonEssential))	Experimental	de las Nieves Peltzer et al 2008; This study	The IlvH protein is not-essential for this reaction (not due to redundancy, but simply because the protein is non-essential), but the reaction is essential for branched chain amino acid biosynthesis. Therefore the 'or NonEssential' was added to represent this and allow the reaction to proceed when ilvH is deleted in silico.		(Smed_2008 and (Smed_2007 or NonEssential))	(ilvI and (ilvH or NonEssential))	(ilvI and (ilvH or NonEssential))	(ilvI and (ilvH or NonEssential))	(ilvI and (ilvH or NonEssential))	(ilvI and (ilvH or NonEssential))	(noHit and (noHit or NonEssential))	(mll1433 and (mll1432 or NonEssential))	(ilvB and (ilvN or NonEssential))	(ilvI and (ilvH or NonEssential))
rxn03436	(S)-2-aceto-2-hydroxybutanoate reductoisomerase reaction 1	cpd00498_c0 (1) <==> cpd10162_c0 (1)	2_Aceto_2_hydroxybutanoate_c0 (1) <==> R_3_Hydroxy_3_methyl_2_oxopentanoate_c0 (1)	TRUE	R05069	1.1.1.86	smc04346	IlvC	Experimental	de las Nieves Peltzer et al 2008; This study	The evidence from this study includes both Tn-seq and independent mutagenesis and confirmation of auxotrophy.		Smed_1962	ilvC	ilvC	ilvC	ilvC	ilvC	RL73_00860	mll1405	ilvC	ilvC
rxn03435	(S)-2-aceto-2-hydroxybutanoate reductoisomerase reaction 2	cpd00006_c0 (1) + cpd02535_c0 (1) <==> cpd00067_c0 (1) + cpd10162_c0 (1) + cpd00005_c0 (1)	NADP_c0 (1) + 2_3_Dihydroxy_3_methylvalerate_c0 (1) <==> H_c0 (1) + R_3_Hydroxy_3_methyl_2_oxopentanoate_c0 (1) + NADPH_c0 (1)	TRUE	R05068	1.1.1.86	smc04346	IlvC	Experimental	de las Nieves Peltzer et al 2008; This study	The evidence from this study includes both Tn-seq and independent mutagenesis and confirmation of auxotrophy.		Smed_1962	ilvC	ilvC	ilvC	ilvC	ilvC	RL73_00860	mll1405	ilvC	ilvC
rxn03437	(R)-2_3-dihydroxy-3-methylpentanoate dehydratase	cpd02535_c0 (1) ==> cpd00508_c0 (1) + cpd00001_c0 (1)	2_3_Dihydroxy_3_methylvalerate_c0 (1) ==> 3MOP_c0 (1) + H2O_c0 (1)	FALSE	R05070	4.2.1.9	smc04045	IlvD2	Experimental	de las Nieves Peltzer et al 2008; This study			Smed_2723	ilvD1	ilvD1	ilvD1	ilvDch1	ilvD	noHit	mlr5361	ilvD	ilvD
rxn01575	Isoleucine aminotransferase	cpd00024_c0 (1) + cpd00322_c0 (1) <==> cpd00508_c0 (1) + cpd00023_c0 (1)	2_Oxoglutarate_c0 (1) + L_Isoleucine_c0 (1) <==> 3MOP_c0 (1) + L_Glutamate_c0 (1)	TRUE	R02199	2.6.1.42	(smc00042 or smc02896)	(IlvE2 or IlvE1)	Predicted		Mutants of either just ilvE2 or ilvE1 are prototrophs (de las Nieves Peltzer et al 2008), and so both may catalyze this reaction.		(Smed_0585 or Smed_3425)	(NGR_c07270 or ilvE)	(OV14_1961 or noHit)	(ilvE or ilvE1)	(ilvE1 or ilvE2)	(ilvE or noHit)	(noHit or noHit)	(mlr7635 or noHit)	(DK53_2550 or noHit)	(ilvE or bll7459)
rxn02185	Acetolactate synthase	cpd00668_c0 (1) + cpd00056_c0 (1) <==> cpd03049b_c0 (1) + cpd00020_c0 (1)	ALCTT_c0 (1) + TPP_c0 (1) <==> 2_Hydroxyethyl_ThPP_branched chain aa synthesis_c0 (1) + Pyruvate_c0 (1)	TRUE	R03050	2.2.1.6	(smc01431 and (smc01430 or NonEssential))	(IlvI and (IlvH or NonEssential))	Experimental	de las Nieves Peltzer et al 2008; This study	The IlvH protein is not-essential for this reaction (not due to redundancy, but simply because the protein is non-essential), but the reaction is essential for branched chain amino acid biosynthesis. Therefore the 'or NonEssential' was added to represent this and allow the reaction to proceed when IlvH is deleted in silico.		(Smed_2008 and (Smed_2007 or NonEssential))	(ilvI and (ilvH or NonEssential))	(ilvI and (ilvH or NonEssential))	(ilvI and (ilvH or NonEssential))	(ilvI and (ilvH or NonEssential))	(ilvI and (ilvH or NonEssential))	(noHit and (noHit or NonEssential))	(mll1433 and (mll1432 or NonEssential))	(ilvB and (ilvN or NonEssential))	(ilvI and (ilvH or NonEssential))
rxn00011b	Acetolactone synthease _ thiamine diphosphate acetaldehyde transferase	cpd00067_c0 (1) + cpd00020_c0 (1) + cpd00056_c0 (1) ==> cpd03049b_c0 (1) + cpd00011_c0 (1)	H_c0 (1) + Pyruvate_c0 (1) + TPP_c0 (1) ==> 2_Hydroxyethyl_ThPP_branched chain aa synthesis_c0 (1) + CO2_c0 (1)	FALSE	R00014	2.2.1.6	(smc01431 and (smc01430 or NonEssential))	(IlvI and (IlvH or NonEssential))	Experimental	de las Nieves Peltzer et al 2008; This study	The IlvH protein is not-essential for this reaction (not due to redundancy, but simply because the protein is non-essential), but the reaction is essential for branched chain amino acid biosynthesis. Therefore the 'or NonEssential' was added to represent this and allow the reaction to proceed when IlvH is deleted in silico.		(Smed_2008 and (Smed_2007 or NonEssential))	(ilvI and (ilvH or NonEssential))	(ilvI and (ilvH or NonEssential))	(ilvI and (ilvH or NonEssential))	(ilvI and (ilvH or NonEssential))	(ilvI and (ilvH or NonEssential))	(noHit and (noHit or NonEssential))	(mll1433 and (mll1432 or NonEssential))	(ilvB and (ilvN or NonEssential))	(ilvI and (ilvH or NonEssential))
rxn02187	Acetolactate methylmutase	cpd00668_c0 (1) <==> cpd02569_c0 (1)	ALCTT_c0 (1) <==> 2_Oxo_3_hydroxyisovalerate_c0 (1)	TRUE	R05071	5.4.99.3	smc04346	IlvC	Experimental	de las Nieves Peltzer et al 2008; This study	The evidence from this study includes both Tn-seq and independent mutagenesis and confirmation of auxotrophy.		Smed_1962	ilvC	ilvC	ilvC	ilvC	ilvC	RL73_00860	mll1405	ilvC	ilvC
rxn03068	(R)-2_3-dihydroxy-3-methylbutanoate oxidoreductase	cpd00006_c0 (1) + cpd02498_c0 (1) <==> cpd00067_c0 (1) + cpd02569_c0 (1) + cpd00005_c0 (1)	NADP_c0 (1) + 2_3_Dihydroxy_isovalerate_c0 (1) <==> H_c0 (1) + 2_Oxo_3_hydroxyisovalerate_c0 (1) + NADPH_c0 (1)	TRUE	R04440	1.1.1.86	smc04346	IlvC	Experimental	de las Nieves Peltzer et al 2008; This study	The evidence from this study includes both Tn-seq and independent mutagenesis and confirmation of auxotrophy.		Smed_1962	ilvC	ilvC	ilvC	ilvC	ilvC	RL73_00860	mll1405	ilvC	ilvC
rxn00898	2_3_Dihydroxy_3_methylbutanoate_hydro_lyase_c0	cpd02498_c0 (1) ==> cpd00123_c0 (1) + cpd00001_c0 (1)	2_3_Dihydroxy_isovalerate_c0 (1) ==> 3_Methyl_2_oxobutanoate_c0 (1) + H2O_c0 (1)	FALSE	R04441	4.2.1.9	smc04045	IlvD2	Experimental	de las Nieves Peltzer et al 2008; This study			Smed_2723	ilvD1	ilvD1	ilvD1	ilvDch1	ilvD	noHit	mlr5361	ilvD	ilvD
rxn00903	Valine aminotransferase	cpd00024_c0 (1) + cpd00156_c0 (1) <==> cpd00123_c0 (1) + cpd00023_c0 (1)	2_Oxoglutarate_c0 (1) + L_Valine_c0 (1) <==> 3_Methyl_2_oxobutanoate_c0 (1) + L_Glutamate_c0 (1)	TRUE	R01214	2.6.1.6	(smc00042 or smc02896)	(IlvE2 or IlvE1)	Predicted		Mutants of either just ilvE2 or ilvE1 are prototrophs (de las Nieves Peltzer et al 2008), and so both may catalyze this reaction		(Smed_0585 or Smed_3425)	(NGR_c07270 or ilvE)	(OV14_1961 or noHit)	(ilvE or ilvE1)	(ilvE1 or ilvE2)	(ilvE or noHit)	(noHit or noHit)	(mlr7635 or noHit)	(DK53_2550 or noHit)	(ilvE or bll7459)
rxn00902	2-isopropylmalate synthase	cpd00123_c0 (1) + cpd00001_c0 (1) + cpd00022_c0 (1) ==> cpd00067_c0 (1) + cpd01646_c0 (1) + cpd00010_c0 (1)	3_Methyl_2_oxobutanoate_c0 (1) + H2O_c0 (1) + Acetyl_CoA_c0 (1) ==> H_c0 (1) + 2_Isopropylmalate_c0 (1) + CoA_c0 (1)	FALSE	R01213	4.1.3.12	smc02717	LeuA1	Experimental	Sanjuán-Pinilla et al 2002; de las Nieves Peltzer et al 2008			Smed_2287	leuA	leuA	leuA1	leuA2	leuA	noHit	mlr2792	leuA	noHit
rxn02789	2-isopropylmalate isomerase	cpd01646_c0 (1) <==> cpd01710_c0 (1) + cpd00001_c0 (1)	2_Isopropylmalate_c0 (1) <==> 2_Isopropylmaleate_c0 (1) + H2O_c0 (1)	TRUE	R03968	4.2.1.33	(smc03795 and smc03823)	(LeuD and LeuC)	Experimental	de las Nieves Peltzer et al 2008; This study			(Smed_3028 and Smed_3059)	(leuD and leuC)	(leuD and leuC)	(leuD and RL4555)	(leuD and leuC)	(leuD and leuC)	(noHit and noHit)	(mll4408 and mll4272)	(leuD and leuC)	(leuD and leuC)
rxn02811	3-isopropylmalate hydrolyase	cpd02693_c0 (1) <==> cpd01710_c0 (1) + cpd00001_c0 (1)	3_Isopropylmalate_c0 (1) <==> 2_Isopropylmaleate_c0 (1) + H2O_c0 (1)	TRUE	R04001	4.2.1.33	(smc03823 and smc03795)	(LeuC and LeuD)	Experimental	de las Nieves Peltzer et al 2008; This study			(Smed_3059 and Smed_3028)	(leuC and leuD)	(leuC and leuD)	(RL4555 and leuD)	(leuC and leuD)	(leuC and leuD)	(noHit and noHit)	(mll4272 and mll4408)	(leuC and leuD)	(leuC and leuD)
rxn03062	3-isopropylmalate dehydrogenase	cpd00003_c0 (1) + cpd02693_c0 (1) <==> cpd02605_c0 (1) + cpd00067_c0 (1) + cpd00004_c0 (1)	NAD_c0 (1) + 3_Isopropylmalate_c0 (1) <==> 2_isopropyl_3_oxosuccinate_c0 (1) + H_c0 (1) + NADH_c0 (1)	TRUE	R04426	1.1.1.85	smc04405	LeuB	Experimental	de las Nieves Peltzer et al 2008; This study			Smed_3178	leuB	leuB	leuB	leuB	leuB	noHit	mll4399	leuB	leuB
rxn01208	2-oxo-4-methyl-3-carboxypentanoate decarboxylation	cpd02605_c0 (1) + cpd00067_c0 (1) ==> cpd00011_c0 (1) + cpd00200_c0 (1)	2_isopropyl_3_oxosuccinate_c0 (1) + H_c0 (1) ==> CO2_c0 (1) + 4MOP_c0 (1)	FALSE	R01652		Spontaneous	Spontaneous					Spontaneous	Spontaneous	Spontaneous	Spontaneous	Spontaneous	Spontaneous	Spontaneous	Spontaneous	Spontaneous	Spontaneous
rxn00806	Leucine aminotransferase	cpd00024_c0 (1) + cpd00107_c0 (1) <==> cpd00200_c0 (1) + cpd00023_c0 (1)	2_Oxoglutarate_c0 (1) + L_Leucine_c0 (1) <==> 4MOP_c0 (1) + L_Glutamate_c0 (1)	TRUE	R01090	2.6.1.6	(smc00042 or smc02896)	(IlvE2 or IlvE1)	Predicted		Mutants of either just ilvE2 or ilvE1 are prototrophs (de las Nieves Peltzer et al 2008), and so both may catalyze this reaction		(Smed_0585 or Smed_3425)	(NGR_c07270 or ilvE)	(OV14_1961 or noHit)	(ilvE or ilvE1)	(ilvE1 or ilvE2)	(ilvE or noHit)	(noHit or noHit)	(mlr7635 or noHit)	(DK53_2550 or noHit)	(ilvE or bll7459)
tRNA synthetases
rxn06300	L-Alanyl-tRNA(Ala) synthetase	cpd00035_c0 (1) + cpd00002_c0 (1) + cpd11906_c0 (1) + cpd00067_c0 (1) ==> cpd11770_c0 (1) + cpd00012_c0 (1) + cpd00018_c0 (1)	L_Alanine_c0 (1) + ATP_c0 (1) + tRNA(Ala)_C10H12N5O3R (1) + H_c0 (1) ==> L-Alanyl-tRNA(Ala)_C13H18N6O4R (1) + PPi_c0 (1) + AMP_c0 (1)	FALSE	R03038	6.1.1.7	smc00475	AlaS	Experimental	This study			Smed_1521	alaS1	alaS1	alaS	alaS2	alaS	RL73_02385	mlr0032	alaS	alaS
rxn06432	L-Arginyl-tRNA(Arg) synthetase	cpd00051_c0 (1) + cpd00002_c0 (1) + cpd11907_c0 (1) + cpd00067_c0 (1) ==> cpd12036_c0 (1) + cpd00012_c0 (1) + cpd00018_c0 (1)	L_Arginine_c0 (1) + ATP_c0 (1) + tRNA(Arg)_C10H12N5O3R (1) + H_c0 (1) ==> L-Arginyl-tRNA(Arg)_C16H26N9O4R (1) + PPi_c0 (1) + AMP_c0 (1)	FALSE	R03646	6.1.1.19	smc02073	ArgS	Experimental	Cowie et al 2006; This study			Smed_1158	argS	argS	argS	argS	argS	RL73_04850	mll1091	argS	bll4757
rxn06936	L-Aspartyl-tRNA(Asp) synthetase	cpd00002_c0 (1) + cpd00041_c0 (1) + cpd11909_c0 (1) + cpd00067_c0 (1) ==> cpd00012_c0 (1) + cpd00018_c0 (1) + cpd12226_c0 (1)	ATP_c0 (1) + L_Aspartate_c0 (1) + tRNA(Asp)_C10H12N5O3R (1) + H_c0 (1) ==> PPi_c0 (1) + AMP_c0 (1) + L-Aspartyl-tRNA(Asp)_C14H17N6O6R (1)	FALSE	R05577	6.1.1.12	smc01756	AspS	Experimental	Cowie et al 2006; This study			Smed_0802	aspS	aspS	aspS	aspS	Atu1153	RL73_01025	mlr8358	aspS	blr4143
rxn06433	L-Aspartyl-tRNA(Asn) synthetase	cpd00041_c0 (1) + cpd00002_c0 (1) + cpd11908_c0 (1) + cpd00067_c0 (1) ==> cpd12829_c0 (1) + cpd00012_c0 (1) + cpd00018_c0 (1)	L_Aspartate_c0 (1) + ATP_c0 (1) + tRNA(Asn)_C10H12N5O3R (1) + H_c0 (1) ==> L-Aspartyl-tRNA(Asn)_C14H17N6O6R (1) + PPi_c0 (1) + AMP_c0 (1)	FALSE	R03647	6.1.1.23	smc01756	AspS	Predicted		S. meliloti 1021 appears to lack an asparaginyl-tRNA synthetase, and so the synthesis of asparaginyl-tRNA may proceed via an aspartate---tRNAAsn ligase. The enzyme that catalyzes this reaction in S. meliloti has not been examined, but as some AspS proteins can catalyze this reaction, this may be the case in S. meliloti.		Smed_0802	aspS	aspS	aspS	aspS	Atu1153	RL73_01025	mlr8358	aspS	blr4143
rxn11595	L-Aspartyl-tRNA(Asn) amidotransferase	cpd00002_c0 (1) + cpd00001_c0 (1) + cpd12829_c0 (1) + cpd00132_c0 (1) ==> cpd12313_c0 (1) + cpd00008_c0 (1) + cpd00009_c0 (1) + cpd00023_c0 (1) + cpd00067_c0 (1)	ATP_c0 (1) + H2O_c0 (1) + L-Aspartyl-tRNA(Asn)_C14H17N6O6R (1) + L_Asparagine_c0 (1) ==> L-Asparaginyl-tRNA(Asn)_C14H19N7O5R (1) + ADP_c0 (1) + Phosphate_c0 (1) + L_Glutamate_c0 (1) + H_c0 (1)	FALSE	R04212	6.3.5.6	(smc01350 and smc01352 and smc01353)	(GatB and GatA and GatC)	Experimental but incomplete	This study	The gatA gatB and gatC genes appeared essential in this Tn-seq data. However, whether this is due to its role in this reaction, rxn10534, or both is not known.\		(Smed_0946 and Smed_0944 and Smed_0943)	(gatB and gatA and gatC)	(gatB and noHit and gatC)	(gatB and gatA and gatC)	(gatB and gatA2 and gatC)	(gatB and gatA and gatC)	(gatB and gatA and RL73_04950)	(mlr0190 and mll0675 and msl0677)	(gatB and gatA and gatC)	(gatB and noHit and gatC)
rxn06435	L-Cysteinyl-tRNA(Cys) synthetase	cpd00084_c0 (1) + cpd00002_c0 (1) + cpd11910_c0 (1) + cpd00067_c0 (1) ==> cpd12255_c0 (1) + cpd00012_c0 (1) + cpd00018_c0 (1)	L_Cysteine_c0 (1) + ATP_c0 (1) + tRNA(Cys)_C10H12N5O3R (1) + H_c0 (1) ==> L-Cysteinyl-tRNA(Cys)_C13H18N6O4RS (1) + PPi_c0 (1) + AMP_c0 (1)	FALSE	R03650	6.1.1.16	smc02551	CysS	Experimental	Cowie et al 2006; This study			Smed_0713	cysS	cysS	cysS	cysS	cysS	RL73_01730	mlr7799	cysS	cysS
rxn06436	L-Glutamyl-tRNA(Gln) synthetase	cpd00023_c0 (1) + cpd00002_c0 (1) + cpd11911_c0 (1) + cpd00067_c0 (1) ==> cpd12828_c0 (1) + cpd00012_c0 (1) + cpd00018_c0 (1)	L_Glutamate_c0 (1) + ATP_c0 (1) + tRNA(Gln)_C10H12N5O3R (1) + H_c0 (1) ==> L-Glutamyl-tRNA(Gln)_C14H17N6O6R (1) + PPi_c0 (1) + AMP_c0 (1)	FALSE	R03651	6.1.1.24	smc03172	GltX	Experimental	Gagnon et al 1996; This study			Smed_2799	gltX1	gltX1	gltX	gltX1	gltX	RL73_03315	mlr0628	noHit	gltX
rxn10534	L-Glutamyl-tRNA(Gln) amidotransferase	cpd00002_c0 (1) + cpd00001_c0 (1) + cpd12828_c0 (1) + cpd00053_c0 (1) ==> cpd12060_c0 (1) + cpd00008_c0 (1) + cpd00009_c0 (1) + cpd00023_c0 (1) + cpd00067_c0 (1)	ATP_c0 (1) + H2O_c0 (1) + L-Glutamyl-tRNA(Gln)_C14H17N6O6R (1) + L_Glutamine_c0 (1) ==> L-Glutaminyl-tRNA(Gln)_C15H21N7O5R (1) + ADP_c0 (1) + Phosphate_c0 (1) + L_Glutamate_c0 (1) + H_c0 (1)	FALSE	R03905	6.3.5.7	(smc01350 and smc01352 and smc01353)	(GatB and GatA and GatC)	Experimental but incomplete	This study	The gatA gatB and gatC genes appeared essential in this Tn-seq data. However, whether this is due to its role in this reaction, rxn10534, or both is not known.\		(Smed_0946 and Smed_0944 and Smed_0943)	(gatB and gatA and gatC)	(gatB and noHit and gatC)	(gatB and gatA and gatC)	(gatB and gatA2 and gatC)	(gatB and gatA and gatC)	(gatB and gatA and RL73_04950)	(mlr0190 and mll0675 and msl0677)	(gatB and gatA and gatC)	(gatB and noHit and gatC)
rxn06438	L-Glycyl-tRNA(Gly) synthetase	cpd00033_c0 (1) + cpd00002_c0 (1) + cpd11913_c0 (1) + cpd00067_c0 (1) ==> cpd12100_c0 (1) + cpd00012_c0 (1) + cpd00018_c0 (1)	Glycine_c0 (1) + ATP_c0 (1) + tRNA(Gly)_C10H12N5O3R (1) + H_c0 (1) ==> L-Glycyl-tRNA(Gly)_C12H16N6O4R (1) + PPi_c0 (1) + AMP_c0 (1)	FALSE	R03654	6.1.1.14	(smc00851 and smc00855)	(GlyS and GlyQ)	Experimental	This study			(Smed_0466 and Smed_0463)	(glyS and glyQ)	(glyS and glyQ)	(glyS and glyQ)	(glyS and glyQ)	(glyS and glyQ)	(RL73_04125 and RL73_00515)	(mlr7435 and mlr7434)	(glyS and glyQ)	(glyS and glyQ)
rxn06440	L-Isoleucyl:tRNA(Ile) synthetase	cpd00322_c0 (1) + cpd00002_c0 (1) + cpd11915_c0 (1) + cpd00067_c0 (1) ==> cpd12256_c0 (1) + cpd00012_c0 (1) + cpd00018_c0 (1)	L_Isoleucine_c0 (1) + ATP_c0 (1) + tRNA(Ile)_C10H12N5O3R (1) + H_c0 (1) ==> L-Isoleucyl-tRNA(Ile)_C16H24N6O4R (1) + PPi_c0 (1) + AMP_c0 (1)	FALSE	R03656	6.1.1.5	smc00908	IleS	Experimental	Cowie et al 2006; This study			Smed_0412	ileS	ileS	ileS	ileS	ileS	ileS	mlr8250	ileS	ileS
rxn06441	L-Leucyl-tRNA(Leu) synthetase	cpd00107_c0 (1) + cpd00002_c0 (1) + cpd11916_c0 (1) + cpd00067_c0 (1) ==> cpd12003_c0 (1) + cpd00012_c0 (1) + cpd00018_c0 (1)	L_Leucine_c0 (1) + ATP_c0 (1) + tRNA(Leu)_C10H12N5O3R (1) + H_c0 (1) ==> L-Leucyl-tRNA(leu)_C16H24N6O4R (1) + PPi_c0 (1) + AMP_c0 (1)	FALSE	R03657	6.1.1.4	smc02804	LeuS	Experimental	Cowie et al 2006; This study			Smed_3198	leuS	leuS	leuS	leuS	leuS	RL73_00220	mll4077	leuS	leuS
rxn06442	L-Lysyl-tRNA(Lys) synthetase	cpd00039_c0 (1) + cpd00002_c0 (1) + cpd11917_c0 (1) + cpd00067_c0 (1) ==> cpd01326_c0 (1) + cpd00012_c0 (1) + cpd00018_c0 (1)	L_Lysine_c0 (1) + ATP_c0 (1) + tRNA(Lys)_C10H12N5O3R (1) + H_c0 (1) ==> L-Lysyl-tRNA(Lys)_C16H29N2O11PR2(C5H8O6PR)n (1) + PPi_c0 (1) + AMP_c0 (1)	FALSE	R03658	6.1.1.6	smc03173	LysS	Experimental	Pelchat et al 1999; Cowie et al 2006; This study			Smed_2800	lysS	lysS	lysS	lysS	lysS	lysS	noHit	noHit	noHit
rxn06443	L-Methionyl-tRNA(Met) synthetase	cpd00060_c0 (1) + cpd00002_c0 (1) + cpd11918_c0 (1) + cpd00067_c0 (1) ==> cpd12105_c0 (1) + cpd00012_c0 (1) + cpd00018_c0 (1)	L_Methionine_c0 (1) + ATP_c0 (1) + tRNA(Met)_C10H12N5O3R (1) + H_c0 (1) ==> L-Methionyl-tRNA(Met)_C15H22N6O4RS (1) + PPi_c0 (1) + AMP_c0 (1)	FALSE	R03659	6.1.1.10	smc01192	MetG	Experimental	This study			Smed_1290	metS	metS	metG	metS	metS	RL73_04055	mll0419	metG	metG
rxn06538	L-Methionyl-tRNA formyltransferase	cpd12105_c0 (1) + cpd00201_c0 (1) ==> cpd00087_c0 (1) + cpd12285_c0 (1)	L-Methionyl-tRNA(Met)_C15H22N6O4RS (1) + 10_Formyltetrahydrofolate_c0 (1) ==> Tetrahydrofolate_c0 (1) + N-Formylmethionyl-tRNA(Met)_C16H21N6O5RS (1)	FALSE	R03940	2.1.2.9	smc01100	Fmt	Experimental	This study			Smed_0055	NGR_c00580	OV14_1345	fmt	fmt	fmt	RL73_06730	mll4854	fmt	fmt
rxn06444	L-Phenylalanyl-tRNA(Phe) synthetase	cpd00066_c0 (1) + cpd00002_c0 (1) + cpd11919_c0 (1) + cpd00067_c0 (1) ==> cpd12335_c0 (1) + cpd00012_c0 (1) + cpd00018_c0 (1)	L_Phenylalanine_c0 (1) + ATP_c0 (1) + tRNA(Phe)_C10H12N5O3R (1) + H_c0 (1) ==> L-Phenylalanyl-tRNA(Phe)_C19H22N6O4R (1) + PPi_c0 (1) + AMP_c0 (1)	FALSE	R03660	6.1.1.20	(smc00365 and smc00366)	(PheS and PheT)	Experimental	Cowie et al 2006; This study			(Smed_3486 and Smed_3487)	(pheS and pheT)	(pheS and pheT)	(pheS and pheT)	(pheS and pheT)	(pheS and pheT)	(RL73_05410 and RL73_05405)	(mll5055 and mll5053)	(pheS and pheT)	(pheS and pheT)
rxn06445	L-Prolyl-tRNA(Pro) synthetase	cpd00129_c0 (1) + cpd00002_c0 (1) + cpd11920_c0 (1) + cpd00067_c0 (1) ==> cpd12164_c0 (1) + cpd00012_c0 (1) + cpd00018_c0 (1)	L_Proline_c0 (1) + ATP_c0 (1) + tRNA(Pro)_C10H12N5O3R (1) + H_c0 (1) ==> L-Prolyl-tRNA(Pro)_C15H19N6O4R (1) + PPi_c0 (1) + AMP_c0 (1)	FALSE	R03661	6.1.1.15	smc01934	ProS	Experimental	This study			Smed_0918	proS	proS	proS	proS	proS	RL73_01545	mll1344	proS	proS
rxn06446	L-Seryl-tRNA(Ser) synthetase	cpd00054_c0 (1) + cpd00002_c0 (1) + cpd11921_c0 (1) + cpd00067_c0 (1) ==> cpd12132_c0 (1) + cpd00012_c0 (1) + cpd00018_c0 (1)	L_Serine_c0 (1) + ATP_c0 (1) + tRNA(Ser)_C10H12N5O3R (1) + H_c0 (1) ==> L-Seryl-tRNA(Ser)_C13H17N6O5R (1) + PPi_c0 (1) + AMP_c0 (1)	FALSE	R03662	6.1.1.11	smc02064	SerS	Experimental	This study			Smed_1167	serS	serS	serS	serS	serS	RL73_05635	mll1081	serS	serS
rxn06447	L-Threonyl-tRNA(Thr) synthetase	cpd00161_c0 (1) + cpd00002_c0 (1) + cpd11922_c0 (1) + cpd00067_c0 (1) ==> cpd12229_c0 (1) + cpd00012_c0 (1) + cpd00018_c0 (1)	L_Threonine_c0 (1) + ATP_c0 (1) + tRNA(Thr)_C10H12N5O3R (1) + H_c0 (1) ==> L-Threonyl-tRNA(Thr)_C14H19N6O5R (1) + PPi_c0 (1) + AMP_c0 (1)	FALSE	R03663	6.1.1.3	smc01010	ThrS	Experimental	Cowie et al 2006; This study			Smed_1054	thrS	thrS	thrS	thrS	thrS	RL73_03345	mll0914	thrS	thrS
rxn06448	L-Tryptophanyl-tRNA(Trp) synthetase	cpd00065_c0 (1) + cpd00002_c0 (1) + cpd11923_c0 (1) + cpd00067_c0 (1) ==> cpd12336_c0 (1) + cpd00012_c0 (1) + cpd00018_c0 (1)	L_Tryptophan_c0 (1) + ATP_c0 (1) + tRNA(Trp)_C10H12N5O3R (1) + H_c0 (1) ==> L-Tryptophanyl-tRNA(Trp)_C21H23N7O4R (1) + PPi_c0 (1) + AMP_c0 (1)	FALSE	R03664	6.1.1.2	smc01121	TrpS	Experimental	This study			Smed_0034	trpS	trpS	trpS	trpS	trpS	RL73_00290	mll5317	trpS	trpS
rxn06280	L-Tyrosyl-tRNA(Tyr) synthetase	cpd00069_c0 (1) + cpd00002_c0 (1) + cpd11751_c0 (1) + cpd00067_c0 (1) ==> cpd12194_c0 (1) + cpd00012_c0 (1) + cpd00018_c0 (1)	L_Tyrosine_c0 (1) + ATP_c0 (1) + tRNA(Tyr)_C10H12N5O3R (1) + H_c0 (1) ==> L-Tyrosyl-tRNA(Tyr)_C19H22N6O5R (1) + PPi_c0 (1) + AMP_c0 (1)	FALSE	R02918	6.1.1.1	smc00526	TyrS	Experimental	This study			Smed_1473	tyrS	tyrS	tyrS1	tyrS	tyrS	RL73_02970	mll0007	tyrS	tyrS
rxn06449	L-Valyl-tRNA(Val) synthetase	cpd00156_c0 (1) + cpd00002_c0 (1) + cpd11924_c0 (1) + cpd00067_c0 (1) ==> cpd12133_c0 (1) + cpd00012_c0 (1) + cpd00018_c0 (1)	L_Valine_c0 (1) + ATP_c0 (1) + tRNA(Val)_C10H12N5O3R (1) + H_c0 (1) ==> L-Valyl-tRNA(Val)_C15H22N6O4R (1) + PPi_c0 (1) + AMP_c0 (1)	FALSE	R03665	6.1.1.9	smc02080	ValS	Experimental	This study			Smed_1151	valS	valS	valS	valS	valS	RL73_04875	mll1104	valS	valS
rxn06937	L-Glutamyl-tRNA(Glu) synthetase	cpd00053_c0 (1) + cpd00002_c0 (1) + cpd11912_c0 (1) + cpd00067_c0 (1) ==> cpd12227_c0 (1) + cpd00012_c0 (1) + cpd00018_c0 (1)	L_Glutamine_c0 (1) + ATP_c0 (1) + tRNA(Glu)_C10H12N5O3R (1) + H_c0 (1) ==> L_Glutamyl_tRNA(Glu)_C15H19N6O6R (1) + PPi_c0 (1) + AMP_c0 (1)	FALSE	R05578	6.1.1.17	smc03172	GltX	Experimental	Gagnon et al 1996; This study			Smed_2799	gltX1	gltX1	gltX	gltX1	gltX	RL73_03315	mlr0628	noHit	gltX
rxn06439	L-Histidyl-tRNA(His) synthetase	cpd00119_c0 (1) + cpd00002_c0 (1) + cpd11914_c0 (1) + cpd00067_c0 (1) ==> cpd12228_c0 (1) + cpd00012_c0 (1) + cpd00018_c0 (1)	L_Histidine_c0 (1) + ATP_c0 (1) + tRNA(His)_C10H12N5O3R (1) + H_c0 (1) ==> L-Histidyl-tRNA(His)_C16H20N8O4R (1) + PPi_c0 (1) + AMP_c0 (1)	FALSE	R03655	6.1.1.21	smc00919	HisS	Experimental	This study			Smed_0403	NGR_c04010	OV14_1715	RL0877	hisS	hisS-1	RL73_05030	mlr6928	hisS	hisS
Protein biosynthesis
rxn12192	Ribosome biogenesis, tRNA modification, protein translation	cpd01326_c0 (319) + cpd11770_c0 (1197) + cpd12003_c0 (1015) + cpd12335_c0 (393) + cpd12036_c0 (730) + cpd12060_c0 (289) + cpd12100_c0 (843) + cpd12105_c0 (213) + cpd12133_c0 (755) + cpd12164_c0 (501) + cpd12194_c0 (228) + cpd12226_c0 (529) + cpd12227_c0 (582) + cpd12228_c0 (210) + cpd12229_c0 (513) + cpd12255_c0 (93) + cpd12256_c0 (546) + cpd12336_c0 (138) + cpd12313_c0 (263) + cpd12132_c0 (578) …	L-Lysyl-tRNA(Lys)_C16H29N2O11PR2(C5H8O6PR)n (319) + L-Alanyl-tRNA(Ala)_C13H18N6O4R (1197) + L-Leucyl-tRNA(leu)_C16H24N6O4R (1015) + L-Phenylalanyl-tRNA(Phe)_C19H22N6O4R (393) + L-Arginyl-tRNA(Arg)_C16H26N9O4R (730) + L-Glutaminyl-tRNA(Gln)_C15H21N7O5R (289) + L-Glycyl-tRNA(Gly)_C12H16N6O4R (843) + L-Methionyl-tRNA(Met)_C15H22N6O4RS (213) + L-Valyl-tRNA(Val)_C15H22N6O4R (755) + L-Prolyl-tRNA(Pro)_…	FALSE			(smc00323 and smc00335 and smc00363 and smc00364 and smc01152 and smc04434 and (smc00565 or NonEssential) and smc00567 and smc00568 and smc01803 and smc01804 and smc01369 and smc01321 and smc01320 and smc01319 and smc01318 and smc01314 and smc01313 and smc01310 and smc01309 and smc01308 and smc01307 and smc01306 and smc01305 and smc01304 and smc01303 and smc01302 and smc01301 and smc01300 and smc…	(RpsO and RpsA and RpmI and RplT and RpsT and RpmH and (RplI or NonEssential) and RpsR and RpsF and RpsI and RplM and RpmG and RplK and RplA and RplJ and RplL and RpsL and RpsG and RpsJ and RplC and RplD and RplW and RplB and RpsS and RplV and RpsC and RplP and RpmC and RpsQ and RplN and RplX and RplE and RpsN and RpsH and RplF and RplR and RpsE and RpmD and RplO and RpsM and RpsK and RplQ and Rp…	Experimental but incomplete	Cowie et al 2006; This study	All genes considered essential in this annotation are supported as essential in the Tn-seq data, supporting their annotation. However, those marked as non-essential require further study to confirm their function. Less insertions than expected were found in rplI, consistent with its annotated function, although not definitive. Less insertions than expected were found in both tufA and tufB, consis…		(Smed_3445 and Smed_3458 and Smed_3484 and Smed_3485 and Smed_0001 and Smed_0081 and (Smed_0738 or NonEssential) and Smed_0740 and Smed_0741 and Smed_0861 and Smed_0862 and Smed_0927 and Smed_0974 and Smed_0975 and Smed_0976 and Smed_0977 and Smed_0981 and Smed_0982 and Smed_0985 and Smed_0986 and Smed_0987 and Smed_0988 and Smed_0989 and Smed_0990 and Smed_0991 and Smed_0992 and Smed_0993 and Sm…	(NGR_c35720 and NGR_c35860 and NGR_c36250 and NGR_c36260 and NGR_c37160 and NGR_c00840 and (NGR_c08840 or NonEssential) and NGR_c08860 and NGR_c08870 and NGR_c10220 and rplM and NGR_c10810 and rplK and rplA and rplJ and NGR_c11820 and rpsL and rpsG and rpsJ and rplC and rplD and rplW and rplB and rpsS and rplV and rpsC and rplP and rpmC and rpsQ and rplN and rplX and rplE and rpsN and rpsH and rp…	(OV14_1093 and OV14_1114 and OV14_1158 and OV14_1159 and OV14_1278 and noHit and (OV14_2156 or NonEssential) and OV14_2158 and OV14_2159 and OV14_2282 and rplM and OV14_2347 and rplK and rplA and rplJ and OV14_2403 and rpsL and rpsG and rpsJ and rplC and rplD and rplW and rplB and noHit and rplV and rpsC and rplP and rpmC and rpsQ and rplN and rplX and rplE and rpsN and rpsH and rplF and rplR and…	(rpsO and rpsA and rpmI and rplT and rpsT and noHit and (rplI or NonEssential) and rpsR and rpsF and rpsI and rplM and rpmG and rplK and rplA and rplJ and rplL and rpsL and rpsG and rpsJ and rplC and rplD and rplW and rplB and rpsS and rplV and rpsC and rplP and rpmC and rpsQ and rplN and rplX and rplE and rpsN and rpsH and rplF and rplR and rpsE and rpmD and rplO and rpsM and rpsK and rplQ and r…	(rpsO and rpsA and rpmI and rplT and rpsT and rpmH and (rplI or NonEssential) and rpsR and rpsF and rpsI and rplM and rpmG and rplK and rplA and rplJ and rplL and rpsL and rpsG and rpsJ and rplC and rplD and rplW and rplB and rpsS and rplV and rpsC and rplP and rpmC and rpsQ and rplN and rplX and rplE and rpsN and rpsH and rplF and rplR and rpsE and rpmD and rplO and rpsM and rpsK and rplQ and rp…	(rpsO and rpsA and rpmI and rplT and rpsT and rpmH and (rplI or NonEssential) and rpsR and rpsF and rpsI and rplM and rpmG and rplK and rplA and rplJ and rplL and rpsL and rpsG and rpsJ and rplC and rplD and rplW and rplB and rpsS and rplV and rpsC and rplP and rpmC and rpsQ and rplN and rplX and rplE and rpsN and rpsH and rplF and rplR and rpsE and rpmD and rplO and rpsM and rpsK and rplQ and rp…	(RL73_00350 and RL73_00735 and RL73_05420 and rplT and RL73_06025 and rpmH and (RL73_01765 or NonEssential) and RL73_01775 and RL73_01780 and RL73_04625 and RL73_04620 and RL73_00570 and RL73_04285 and RL73_04280 and RL73_04275 and RL73_04270 and RL73_02160 and RL73_02165 and RL73_02180 and RL73_02185 and RL73_02190 and RL73_02195 and rplB and RL73_02205 and RL73_02210 and RL73_02215 and RL73_022…	(msr5561 and mll5210 and msl5059 and mll5057 and mll5582 and msr4809 and (mll7843 or NonEssential) and msl7844 and mll7846 and mll8456 and mll8458 and msr0848 and mlr0271 and mlr0273 and mlr0274 and mlr0275 and mlr0283 and mlr0284 and mlr0289 and mlr0291 and mlr0292 and msr0293 and mlr0295 and msr0297 and mlr0298 and mlr0300 and mlr0301 and msr0303 and msr0304 and mlr0305 and mlr0306 and mlr0308 …	(rpsO and rpsA and rpmI and rplT and rpsT and noHit and (rplI or NonEssential) and rpsR and rpsF and DK53_790 and rplM and rpmG and rplK and rplA and rplJ and rplL and rpsL and rpsG and rpsJ and rplC and rplD and rplW and rplB and rpsS and rplV and rpsC and rplP and rpmC and rpsQ and rplN and rplX and DK53_1204 and DK53_1203 and DK53_1202 and rplF and rplR and rpsE and rpmD and rplO and rpsM and …	(rpsO and rpsA and rpmI and rplT and rpsT and bsr8096 and (rplI or NonEssential) and rpsR and rpsF and rpsI and rplM and rpmG and rplK and rplA and rplJ and rplL and rpsL and rpsG and rpsJ and rplC and rplD and rplW and rplB and rpsS and rplV and rpsC and rplP and rpmC and rpsQ and rplN and rplX and rplE and rpsN and rpsH and rplF and rplR and rpsE and rpmD and rplO and rpsM and rpsK and rplQ and…
rxnProtDF	Protein N-formylmethionine cleavage	cpdProFM_c0 (1) ==> cpd11463_c0 (1) + cpd02012_c0 (1)	N-formylmethionine containing protein (1) ==> protein (1) + N-Formyl-L-methionine (1)	FALSE		3.4.11.18	(smc00298 or smb21002)	(Map1 or Map2)	Experimental but incomplete	This study	The map1 gene appeared essential in this Tn-seq data only in the absence of pSymA and pSymB. This is consistent with map1 having the annotated function but with a second copy on pSymA or pSymB, the most likely candidate being map2. Interestingly, map2 is on pSymB due to a translocation from the chromosome (diCenzo et al 2013)		(Smed_1458 or Smed_4508)	(map1 or map2)	(map1 or map2)	(map1 or map2)	(map1 or map2)	(map or map)	(RL73_02325 or noHit)	(mlr0954 or noHit)	(map or noHit)	(map or map)
rxn00455	N-Formyl-L-methionine amidohydrolase	cpd00001_c0 (1) + cpd02012_c0 (1) <==> cpd00047_c0 (1) + cpd00060_c0 (1)	H2O_c0 (1) + N-Formyl-L-methionine (1) <==> Formate_c0 (1) + L_Methionine_c0 (1)	TRUE	R00653	3.5.1.31	smc01101	Def1	Experimental	This study			Smed_0054	NGR_c00570	OV14_1344	def1	def1	def	RL73_06735	mll4855	def	def
Purine biosynthesis
rxn00790	Amidophosphoribosyltransferase	cpd00001_c0 (1) + cpd00053_c0 (1) + cpd00103_c0 (1) ==> cpd01982_c0 (1) + cpd00012_c0 (1) + cpd00023_c0 (1)	H2O_c0 (1) + L_Glutamine_c0 (1) + PRPP_c0 (1) ==> 5_Phosphoribosylamine_c0 (1) + PPi_c0 (1) + L_Glutamate_c0 (1)	FALSE	R01072	2.4.2.14	smc00554	PurF	Experimental	This study			Smed_0727	NGR_c08750	OV14_2144	purF	purF	purF	RL73_01740	mll7833	purF	purF
rxn02895	Phosphoribosylamine--glycine ligase	cpd00002_c0 (1) + cpd01982_c0 (1) + cpd00033_c0 (1) ==> cpd00067_c0 (1) + cpd02394_c0 (1) + cpd00009_c0 (1) + cpd00008_c0 (1)	ATP_c0 (1) + 5_Phosphoribosylamine_c0 (1) + Glycine_c0 (1) ==> H_c0 (1) + GAR_c0 (1) + Phosphate_c0 (1) + ADP_c0 (1)	FALSE	R04144	6.3.4.13	smc00993	PurD	Experimental	This study			Smed_0471	purD	purD	purD	purD	purD	RL73_04135	mlr7447	purD	purD
rxn03004	Phosphoribosylglycinamide formyltransferase	cpd00201_c0 (1) + cpd02394_c0 (1) <==> cpd00067_c0 (1) + cpd00087_c0 (1) + cpd02678_c0 (1)	10_Formyltetrahydrofolate_c0 (1) + GAR_c0 (1) <==> H_c0 (1) + Tetrahydrofolate_c0 (1) + N_Formyl_GAR_c0 (1)	TRUE	R04325	2.1.2.2	(smc00614 or (sma2141 and Unknown))	(PurN or (PurU3 and Unknown))	Experimental but incomplete	Barr et al 2008; This study	In this Tn-seq data, it appeared that purN mutations were not lethal except in the absence of pSymA and pSymB. In E. coli, FGAT can be produced by PurN or by PurU/PurT. We therefore suggest that the PurU protein encoded on pSymA together with an unidentified PurT homolog can bypass PurN in S. meliloti.		(Smed_0791 or (noHit and Unknown))	(purN or (purU1 and Unknown))	(purN or (purU1 and Unknown))	(purN or (noHit and Unknown))	(purN or (noHit and Unknown))	(purN or (noHit and Unknown))	(RL73_05460 or (noHit and Unknown))	(mll7961 or (noHit and Unknown))	(purN or (noHit and Unknown))	(purN or (noHit and Unknown))
rxn03084	Phosphoribosylformylglycineamide synthase	cpd00002_c0 (1) + cpd00001_c0 (1) + cpd00053_c0 (1) + cpd02678_c0 (1) ==> cpd00067_c0 (1) + cpd02826_c0 (1) + cpd00009_c0 (1) + cpd00023_c0 (1) + cpd00008_c0 (1)	ATP_c0 (1) + H2O_c0 (1) + L_Glutamine_c0 (1) + N_Formyl_GAR_c0 (1) ==> H_c0 (1) + 5_Phosphoribosylformylglycinamidine_c0 (1) + Phosphate_c0 (1) + L_Glutamate_c0 (1) + ADP_c0 (1)	FALSE	R04463	6.3.5.3	(smc00494 and smc00488 and smc00493)	(PurS and PurL and PurQ)	Experimental	This study			(Smed_1499 and Smed_1505 and Smed_1500)	(purS and purL and purQ)	(purS and purL and purQ)	(noHit and purL and purQ)	(purS and purL and purQ)	(purS and purL and purQ)	(RL73_02770 and RL73_02755 and RL73_02765)	(msl0067 and mll0057 and mll0065)	(purS and purL and purQ)	(bsl5728 and purL and purQ)
rxn02937	2_Formamido_N1_5_phosphoribosylacetamidine_cyclo_ligase_c0	cpd00002_c0 (1) + cpd02826_c0 (1) <==> cpd00067_c0 (1) + cpd00009_c0 (1) + cpd00008_c0 (1) + cpd02140_c0 (1)	ATP_c0 (1) + 5_Phosphoribosylformylglycinamidine_c0 (1) <==> H_c0 (1) + Phosphate_c0 (1) + ADP_c0 (1) + AIR_c0 (1)	TRUE	R04208	6.3.3.1	smc00615	PurM	Experimental	This study			Smed_0792	NGR_c09330	OV14_2210	purM	purM	garS	RL73_05455	mll7962	purM	garS
rxn05229	NCAIR synthetase and NCAIR mutase	cpd00002_c0 (1) + cpd02140_c0 (1) + cpd00242_c0 (1) ==> cpd02893_c0 (1) + cpd00067_c0 (1) + cpd00009_c0 (1) + cpd00008_c0 (1)	ATP_c0 (1) + AIR_c0 (1) + H2CO3_c0 (1) ==> 5_Phosphoribosyl_4_carboxy_5_aminoimidazole_c0 (1) + H_c0 (1) + Phosphate_c0 (1) + ADP_c0 (1)	FALSE	R07404 and R07405	6.3.4.18 and 5.4.99.18	(smc04001 and smc04002)	(PurE and PurK)	Experimental	This study			(Smed_2672 and Smed_2673)	(NGR_c28300 and purK)	(OV14_0278 and purK)	(purE and purK)	(purE and purK)	(purE and purK)	(purE and RL73_04360)	(mlr3809 and mlr3811)	(purE and purK)	(purE and purK)
rxn03147	Phosphoribosylaminoimidazolesuccinocarboxamide synthase	cpd02893_c0 (1) + cpd00002_c0 (1) + cpd00041_c0 (1) ==> cpd00067_c0 (2) + cpd00009_c0 (1) + cpd00008_c0 (1) + cpd02921_c0 (1)	5_Phosphoribosyl_4_carboxy_5_aminoimidazole_c0 (1) + ATP_c0 (1) + L_Aspartate_c0 (1) ==> H_c0 (2) + Phosphate_c0 (1) + ADP_c0 (1) + SAICAR_c0 (1)	FALSE	R04591	6.3.2.6	smc00495	PurC	Experimental	This study			Smed_1498	purC	purC	purC1	purC1	noHit	noHit	mll0069	purC	purC
rxn03136	1-(5'-Phosphoribosyl)-5-amino-4-(N-succinocarboxamide)-imidazole AMP-lyase	cpd02921_c0 (1) <==> cpd02851_c0 (1) + cpd00106_c0 (1)	SAICAR_c0 (1) <==> AICAR_c0 (1) + Fumarate_c0 (1)	TRUE	R04559	4.3.2.2	smc00508	PurB	Experimental	This study			Smed_1492	NGR_c15170	OV14_2940	purB	purB	purB	RL73_02780	mll0079	purB	purB
rxn03137	Phosphoribosylaminoimidazolecarboxamide formyltransferase	cpd00201_c0 (1) + cpd02851_c0 (1) <==> cpd00087_c0 (1) + cpd02884_c0 (1)	10_Formyltetrahydrofolate_c0 (1) + AICAR_c0 (1) <==> Tetrahydrofolate_c0 (1) + FAICAR_c0 (1)	TRUE	R04560	2.1.2.3	smc04088	PurH	Experimental	This study			Smed_3189	purH	purH	purH	purH	purH	purH	mlr4101	purH	purH
rxn00832	IMP cyclohydrolase	cpd00114_c0 (1) + cpd00001_c0 (1) <==> cpd02884_c0 (1)	IMP_c0 (1) + H2O_c0 (1) <==> FAICAR_c0 (1)	TRUE	R01127	3.5.4.10	smc04088	PurH	Experimental	This study			Smed_3189	purH	purH	purH	purH	purH	purH	mlr4101	purH	purH
rxn00834	IMP dehydrogenase	cpd00114_c0 (1) + cpd00001_c0 (1) + cpd00003_c0 (1) <==> cpd00067_c0 (1) + cpd00497_c0 (1) + cpd00004_c0 (1)	IMP_c0 (1) + H2O_c0 (1) + NAD_c0 (1) <==> H_c0 (1) + XMP_c0 (1) + NADH_c0 (1)	TRUE	R01130	1.1.1.205	smc00815	GuaB	Experimental	Collavino et al 2005; This study			Smed_0379	NGR_c03770	OV14_1689	guaB	guaB	guaB	RL73_05275	mlr8350	guaB	guaB
rxn00917	GMP synthase	cpd00002_c0 (1) + cpd00497_c0 (1) + cpd00001_c0 (1) + cpd00053_c0 (1) ==> cpd00067_c0 (1) + cpd00018_c0 (1) + cpd00126_c0 (1) + cpd00012_c0 (1) + cpd00023_c0 (1)	ATP_c0 (1) + XMP_c0 (1) + H2O_c0 (1) + L_Glutamine_c0 (1) ==> H_c0 (1) + AMP_c0 (1) + GMP_c0 (1) + PPi_c0 (1) + L_Glutamate_c0 (1)	FALSE	R01231	6.3.5.2	smc00394	GuaA	Experimental	This study			Smed_3517	guaA	guaA	guaA	guaA1	guaA	guaA	mlr6950	guaA	guaA
rxn09562	Guanylate kinase: GMP	cpd00126_c0 (1) + cpd00115_c0 (1) <==> cpd00177_c0 (1) + cpd00031_c0 (1)	GMP_c0 (1) + dATP_c0 (1) <==> dADP_c0 (1) + GDP_c0 (1)	TRUE	R00332	2.7.4.8	smc00577	Gmk	Experimental	Liu et al 2015; This study			Smed_0759	NGR_c08970	OV14_2168	gmk	gmk2	gmk	RL73_05125	mlr7857	gmk	gmk
rxn00237	Nucleoside disphosphate kinase: GDP	cpd00002_c0 (1) + cpd00031_c0 (1) <==> cpd00038_c0 (1) + cpd00008_c0 (1)	ATP_c0 (1) + GDP_c0 (1) <==> GTP_c0 (1) + ADP_c0 (1)	TRUE	R00330	2.7.4.6	smc00595	Ndk	Experimental	This study			Smed_0775	NGR_c09130	OV14_2189	ndk	ndk	ndk	ndk	mll7917	DK53_699	ndk
rxn05233	Ribonucleotide reductase: GDP	cpd00031_c0 (1) + cpd11421_c0 (1) ==> cpd00001_c0 (1) + cpd00295_c0 (1) + cpd11420_c0 (1)	GDP_c0 (1) + trdrd_c0 (1) ==> H2O_c0 (1) + dGDP_c0 (1) + trdox_c0 (1)	FALSE	R02019	1.17.4.1	smc01237	NrdJ	Experimental	Taga and Walker 2010; Cowie et al 2006; This study			Smed_1233	nrd	nrd	RL1945	nrd	nrdE	noHit	mll0136	DK53_1030	nrdE
rxn01353	Nucleoside disphosphate kinase: dGDP	cpd00002_c0 (1) + cpd00295_c0 (1) <==> cpd00241_c0 (1) + cpd00008_c0 (1)	ATP_c0 (1) + dGDP_c0 (1) <==> dGTP_c0 (1) + ADP_c0 (1)	TRUE	R01857	2.7.4.6	smc00595	Ndk	Experimental	This study			Smed_0775	NGR_c09130	OV14_2189	ndk	ndk	ndk	ndk	mll7917	DK53_699	ndk
rxn00838	Adenylosuccinate synthetase	cpd00114_c0 (1) + cpd00041_c0 (1) + cpd00038_c0 (1) ==> cpd00067_c0 (2) + cpd00009_c0 (1) + cpd02375_c0 (1) + cpd00031_c0 (1)	IMP_c0 (1) + L_Aspartate_c0 (1) + GTP_c0 (1) ==> H_c0 (2) + Phosphate_c0 (1) + Adenylosuccinate_c0 (1) + GDP_c0 (1)	FALSE	R01135	6.3.4.4	smc00643	PurA	Experimental	This study			Smed_2616	purA	purA	purA	purA	purA	RL73_05940	mll3873	purA	purA
rxn00800	Adenylosuccinate lyase	cpd02375_c0 (1) <==> cpd00018_c0 (1) + cpd00106_c0 (1)	Adenylosuccinate_c0 (1) <==> AMP_c0 (1) + Fumarate_c0 (1)	TRUE	R01083	4.3.2.2	smc00508	PurB	Experimental	This study			Smed_1492	NGR_c15170	OV14_2940	purB	purB	purB	RL73_02780	mll0079	purB	purB
rxn01127	Adenylate kinase: AMP	cpd00018_c0 (1) + cpd00002_c0 (1) <==> cpd00008_c0 (2)	AMP_c0 (1) + ATP_c0 (1) <==> ADP_c0 (2)	TRUE	R00127	2.7.4.3	smc01288	Adk	Experimental	This study			Smed_1007	NGR_c12110	OV14_2433	adk1	adk	adk	RL73_02290	mlr0322	DK53_1195	bll5379
rxn05231	Ribonucleotide reductase: ADP	cpd00008_c0 (1) + cpd11421_c0 (1) ==> cpd00001_c0 (1) + cpd00177_c0 (1) + cpd11420_c0 (1)	ADP_c0 (1) + trdrd_c0 (1) ==> H2O_c0 (1) + dADP_c0 (1) + trdox_c0 (1)	FALSE	R02017	1.17.4.1	smc01237	NrdJ	Experimental	Taga and Walker 2010; Cowie et al 2006; This study			Smed_1233	nrd	nrd	RL1945	nrd	nrdE	noHit	mll0136	DK53_1030	nrdE
rxn00839	Nucleoside disphosphate kinase: dADP	cpd00002_c0 (1) + cpd00177_c0 (1) <==> cpd00115_c0 (1) + cpd00008_c0 (1)	ATP_c0 (1) + dADP_c0 (1) <==> dATP_c0 (1) + ADP_c0 (1)	TRUE	R01137	2.7.4.6	smc00595	Ndk	Experimental	This study			Smed_0775	NGR_c09130	OV14_2189	ndk	ndk	ndk	ndk	mll7917	DK53_699	ndk
Pyrimidine biosynthesis
rxn00414	Carbamoyl phosphate synthase	cpd00002_c0 (2) + cpd00001_c0 (1) + cpd00053_c0 (1) + cpd00242_c0 (1) ==> cpd00067_c0 (1) + cpd00009_c0 (1) + cpd00146_c0 (1) + cpd00023_c0 (1) + cpd00008_c0 (2)	ATP_c0 (2) + H2O_c0 (1) + L_Glutamine_c0 (1) + H2CO3_c0 (1) ==> H_c0 (1) + Phosphate_c0 (1) + Carbamoylphosphate_c0 (1) + L_Glutamate_c0 (1) + ADP_c0 (2)	FALSE	R00575	6.3.5.5	(smc01569 and smc01215)	(CarA and CarB)	Experimental	Kerppola and Kahn 1988a; Vineetha et al 2001; This study			(Smed_2229 and Smed_1257)	(carA and carB)	(carA and carB)	(carA and carB)	(carA and carB)	(carA and carB)	(RL73_01010 and RL73_00835)	(mlr2489 and mlr2517)	(carA and carB)	(carA and carB)
rxn01018	Aspartate carbamoyltransferase	cpd00041_c0 (1) + cpd00146_c0 (1) ==> cpd00067_c0 (2) + cpd00009_c0 (1) + cpd00343_c0 (1)	L_Aspartate_c0 (1) + Carbamoylphosphate_c0 (1) ==> H_c0 (2) + Phosphate_c0 (1) + N_Carbamoyl_L_aspartate_c0 (1)	FALSE	R01397	2.1.3.2	(smc01360 and smc01361)	(PyrB and PyrX)	Experimental but incomplete	This study	In some organisms like Pseudomonas putida, the PyrB protein requires an inactive dihydroorotase protein to function. The Smc01361 protein is encoded downstream of the PyrB protein, is annotated as a dihydroorotase, was essential in this Tn-seq study, and its mutation results in pyrimidine auxotrophy as determined in this study (Figure S14). We therefore postulate that Smc01361 is an inactive dihy…		(Smed_0936 and Smed_0935)	(NGR_c10900 and NGR_c10890)	(OV14_2357 and OV14_2356)	(pyrB and pyrC2)	(pyrB and RHE_CH01641)	(pyrB and pyrC)	(pyrB and RL73_04815)	(mlr0686 and mlr0687)	(pyrB and pyrC)	(pyrB and blr5100)
rxn01465	Dihydroorotase	cpd00001_c0 (1) + cpd00282_c0 (1) <==> cpd00067_c0 (1) + cpd00343_c0 (1)	H2O_c0 (1) + S_Dihydroorotate_c0 (1) <==> H_c0 (1) + N_Carbamoyl_L_aspartate_c0 (1)	TRUE	R01993	3.5.2.3	smc02166	PyrC	Experimental	Vineetha et al 2001; This study			Smed_0106	pyrC	pyrC	pyrC	pyrC	pyrC	RL73_03370	noHit	noHit	noHit
rxn01360	Dihydroorotate dehydrogenase	cpd00282_c0 (1) + cpd00007_c0 (1) ==> cpd00247_c0 (1) + cpd00025_c0 (1)	S_Dihydroorotate_c0 (1) + O2_c0 (1) ==> Orotate_c0 (1) + H2O2_c0 (1)	FALSE	R01867	1.3.99.11	smc02245	PyrD	Experimental	This study			Smed_0161	pyrD	pyrD	RL0572	pyrD	pyrD	RL73_00920	mll5681	pyrD	pyrD
rxn01362	Orotate phosphoribosyltransferase	cpd00247_c0 (1) + cpd00103_c0 (1) ==> cpd00012_c0 (1) + cpd00810_c0 (1)	Orotate_c0 (1) + PRPP_c0 (1) ==> PPi_c0 (1) + Orotidylic_acid_c0 (1)	FALSE	R01870	2.4.2.10	smc02165	PyrE	Experimental	This study			Smed_0107	pyrE	pyrE	RL0501	pyrE	pyrE	RL73_03365	mll5916	noHit	noHit
rxn00710	Orotidine 51-phosphate decarboxylase	cpd00067_c0 (1) + cpd00810_c0 (1) ==> cpd00091_c0 (1) + cpd00011_c0 (1)	H_c0 (1) + Orotidylic_acid_c0 (1) ==> UMP_c0 (1) + CO2_c0 (1)	FALSE	R00965	4.1.1.23	smc00412	PyrF	Experimental	This study			Smed_3540	pyrF	pyrF	pyrF	pyrF	pyrF	RL73_00760	mll4751	pyrF	pyrF
rxn00119	Uridylate kinase: UMP	cpd00091_c0 (1) + cpd00002_c0 (1) <==> cpd00014_c0 (1) + cpd00008_c0 (1)	UMP_c0 (1) + ATP_c0 (1) <==> UDP_c0 (1) + ADP_c0 (1)	TRUE	R00158	2.7.4.14	smc02099	PyrH	Experimental	This study			Smed_1133	pyrH	pyrH	pyrH	pyrH	pyrH	pyrH	mll0643	pyrH	pyrH
rxn00117	Nucleoside diphosphate kinase: UDP	cpd00002_c0 (1) + cpd00014_c0 (1) <==> cpd00062_c0 (1) + cpd00008_c0 (1)	ATP_c0 (1) + UDP_c0 (1) <==> UTP_c0 (1) + ADP_c0 (1)	TRUE	R00156	2.7.4.6	smc00595	Ndk	Experimental	This study			Smed_0775	NGR_c09130	OV14_2189	ndk	ndk	ndk	ndk	mll7917	DK53_699	ndk
rxn00412	CTP synthetase	cpd00002_c0 (1) + cpd00001_c0 (1) + cpd00062_c0 (1) + cpd00053_c0 (1) ==> cpd00067_c0 (2) + cpd00009_c0 (1) + cpd00023_c0 (1) + cpd00008_c0 (1) + cpd00052_c0 (1)	ATP_c0 (1) + H2O_c0 (1) + UTP_c0 (1) + L_Glutamine_c0 (1) ==> H_c0 (2) + Phosphate_c0 (1) + L_Glutamate_c0 (1) + ADP_c0 (1) + CTP_c0 (1)	FALSE	R00573	6.3.4.2	smc01025	PyrG	Experimental	Cowie et al 2006; This study			Smed_1069	pyrG	pyrG	pyrG	pyrG	pyrG	RL73_02435	mll0606	pyrG	pyrG
rxn00409	Nucleoside diphosphate kinase: CDP	cpd00002_c0 (1) + cpd00096_c0 (1) <==> cpd00008_c0 (1) + cpd00052_c0 (1)	ATP_c0 (1) + CDP_c0 (1) <==> ADP_c0 (1) + CTP_c0 (1)	TRUE	R00570	2.7.4.6	smc00595	Ndk	Experimental	This study			Smed_0775	NGR_c09130	OV14_2189	ndk	ndk	ndk	ndk	mll7917	DK53_699	ndk
rxn06076	Ribonucleotide reductase: CDP	cpd00096_c0 (1) + cpd11421_c0 (1) ==> cpd00001_c0 (1) + cpd00533_c0 (1) + cpd11420_c0 (1)	CDP_c0 (1) + trdrd_c0 (1) ==> H2O_c0 (1) + dCDP_c0 (1) + trdox_c0 (1)	FALSE	R02024	1.17.4.1	smc01237	NrdJ	Experimental	Taga and Walker 2010; Cowie et al 2006; This study			Smed_1233	nrd	nrd	RL1945	nrd	nrdE	noHit	mll0136	DK53_1030	nrdE
rxn01673	Nucleoside diphosphate kinase: dCDP	cpd00002_c0 (1) + cpd00533_c0 (1) <==> cpd00356_c0 (1) + cpd00008_c0 (1)	ATP_c0 (1) + dCDP_c0 (1) <==> dCTP_c0 (1) + ADP_c0 (1)	TRUE	R02326	2.7.4.6	smc00595	Ndk	Experimental	This study			Smed_0775	NGR_c09130	OV14_2189	ndk	ndk	ndk	ndk	mll7917	DK53_699	ndk
rxn01672	dCTP aminohydrolase	cpd00067_c0 (1) + cpd00001_c0 (1) + cpd00356_c0 (1) ==> cpd00358_c0 (1) + cpd00013_c0 (1)	H_c0 (1) + H2O_c0 (1) + dCTP_c0 (1) ==> dUTP_c0 (1) + NH3_c0 (1)	FALSE	R02325	3.5.4.13	smc02218	Smc02218	Experimental	This study			Smed_0134	dcd	dcd	RL0555	dcd	dcd	RL73_06665	mlr5652	DK53_345	dcd
rxn01678	Nucleoside diphosphate kinase: dUDP	cpd00002_c0 (1) + cpd00978_c0 (1) <==> cpd00358_c0 (1) + cpd00008_c0 (1)	ATP_c0 (1) + dUDP_c0 (1) <==> dUTP_c0 (1) + ADP_c0 (1)	TRUE	R02331	2.7.4.6	smc00595	Ndk	Experimental	This study			Smed_0775	NGR_c09130	OV14_2189	ndk	ndk	ndk	ndk	mll7917	DK53_699	ndk
rxn01517	Uridylate kinase: dUMP	cpd00002_c0 (1) + cpd00299_c0 (1) <==> cpd00978_c0 (1) + cpd00008_c0 (1)	ATP_c0 (1) + dUMP_c0 (1) <==> dUDP_c0 (1) + ADP_c0 (1)	TRUE	R02098	2.7.4.9	smc01189	Tmk	Experimental	This study			Smed_1292	tmk	tmk	tmk	tmk	tmk	RL73_04065	mll0424	tmk	tmk
rxn01520	Thymidylate synthase	cpd00299_c0 (1) + cpd00125_c0 (1) ==> cpd00330_c0 (1) + cpd00298_c0 (1)	dUMP_c0 (1) + 5_10_Methylenetetrahydrofolate_c0 (1) ==> Dihydrofolate_c0 (1) + dTMP_c0 (1)	FALSE	R02101	2.1.1.45	smc01444	ThyA	Experimental	Ross et al 1990; O'Flaherty et al 1995; This study			Smed_2021	thyA	thyA	thyA	thyA	thyA	RL73_03280	mll1467	thyA	thyA
rxn01513	Thymidylate kinase: dTMP	cpd00002_c0 (1) + cpd00298_c0 (1) <==> cpd00297_c0 (1) + cpd00008_c0 (1)	ATP_c0 (1) + dTMP_c0 (1) <==> dTDP_c0 (1) + ADP_c0 (1)	TRUE	R02094	2.7.4.9	smc01189	Tmk	Experimental	This study			Smed_1292	tmk	tmk	tmk	tmk	tmk	RL73_04065	mll0424	tmk	tmk
rxn01512	Nucleoside diphosphate kinase: dTDP	cpd00002_c0 (1) + cpd00297_c0 (1) <==> cpd00357_c0 (1) + cpd00008_c0 (1)	ATP_c0 (1) + dTDP_c0 (1) <==> dTTP_c0 (1) + ADP_c0 (1)	TRUE	R02093	2.7.4.6	smc00595	Ndk	Experimental	This study			Smed_0775	NGR_c09130	OV14_2189	ndk	ndk	ndk	ndk	mll7917	DK53_699	ndk
rxn00364	Cytidylate kinase - CMP	cpd00002_c0 (1) + cpd00046_c0 (1) <==> cpd00096_c0 (1) + cpd00008_c0 (1)	ATP_c0 (1) + CMP_c0 (1) <==> CDP_c0 (1) + ADP_c0 (1)	TRUE	R00512	2.7.4.14	smc00334	Cmk	Predicted		This gene did not appear essential in this Tn-seq data, although less than expected number of insertions were found in this gene during growth in rich medium. The inclusion of this reaction is not due to a requirement to produce CMP, but due to a requirement to metabolize CMP released during other reactions. This reaction is presumably dispensible in true cells due to other fates of the CMP.		Smed_3457	NGR_c35850	OV14_1113	RL0107	cmk	cmk	RL73_00730	mll5212	cmk	cmk
DNA biosynthesis
rxn05294	DNA synthesis and partitioning	cpd00002_c0 (100) + cpd00115_c0 (18.95) + cpd00356_c0 (31.05) + cpd00241_c0 (31.05) + cpd00357_c0 (18.95) + cpd00001_c0 (100) ==> cpd11461_c0 (1) + cpd00008_c0 (100) + cpd00009_c0 (100) + cpd00012_c0 (100) + cpd00067_c0 (100)	ATP_c0 (100) + dATP_c0 (18.95) + dCTP_c0 (31.05) + dGTP_c0 (31.05) + dTTP_c0 (18.95) + H2O_c0 (100) ==> DNA (1) + ADP_c0 (100) + Phosphate_c0 (100) + PPi_c0 (100) + H_c0 (100)	FALSE			((smc02789 or NonEssential) and smc01375 and smc02905 and smc01190 and smc00415 and smc00586 and smc02802 and smc00561 and smc01567 and smc02857 and smc01142 and smc01233 and (smc00018 or smc02327 or smc00867) and (smc02850 or NonEssential) and smc01878 and smc01231 and smc02782 and smc01761 and smc01018 and smc01364 and smc00617 and smc01167 and smc02496 and smc02800 and smc02801)	((DnaQ or NonEssential) and DnaE1 and DnaX and Smc01190 and DnaN and Smc00586 and Smc02802 and DnaB and DnaG and DnaK and GrpE and Ssb and (RnhA or RnhA2 or RnhB) and (PolA or NonEssential) and LigA and GyrA and GyrB and ParC and ParE and TopA and Smc00617 and DnaA and PriA and ParA and ParB)	Experimental but incomplete	Margolin et al 1995; Nisa-Martínez et al 2016; Frage et al 2016; Cowie et al 2006; This study	The annotation of many of the proteins are supported by previous work and their mutation appeared lethal in this Tn-seq data. However, the role of proteins that either appear non-essential or redundant are not validated. The Smc00617 protein is included here as it was essential in the Tn-seq data and may be an ortholog of the essential Hda protein of E. coli. There appears to be no theta or psi p…		((Smed_3213 or NonEssential) and Smed_0921 and Smed_3432 and Smed_1291 and Smed_3543 and Smed_0767 and Smed_3200 and Smed_0734 and Smed_2227 and Smed_3389 and Smed_0012 and Smed_1236 and (Smed_0529 or noHit or Smed_0451) and (Smed_3381 or NonEssential) and Smed_2070 and Smed_1241 and Smed_3220 and Smed_0807 and Smed_1062 and Smed_0932 and Smed_0794 and Smed_0002 and Smed_2927 and Smed_3202 and Sm…	((dnaQ or NonEssential) and dnaE2 and dnaX and NGR_c16060 and dnaN and NGR_c09050 and NGR_c33410 and NGR_c08820 and dnaG and dnaK2 and grpE and NGR_c15580 and (rnhA or noHit or rnhB) and (polA or NonEssential) and ligA and gyrA and gyrB and parC and NGR_c12710 and topA and NGR_c09350 and dnaA and NGR_c31160 and NGR_c33430 and NGR_c33420)	((dnaQ or NonEssential) and dnaE2 and dnaX and OV14_2838 and dnaN and OV14_2178 and OV14_0868 and OV14_2151 and dnaG and dnaK2 and grpE and OV14_2887 and (rnhA or noHit or rnhB) and (polA or NonEssential) and ligA and gyrA and gyrB and parC and OV14_2493 and topA and OV14_2212 and dnaA and OV14_0607 and OV14_0870 and OV14_0869)	((RL0005 or NonEssential) and dnaE3 and dnaX and holB and dnaN and RL1572 and RL4734 and dnaC and dnaG and dnaK and RL0382 and ssb and (rnhA1 or noHit or RL0930) and (polA or NonEssential) and ligA and gyrA and gyrB1 and parC and gyrB2 and topA and RL1598 and dnaA and priA and parA1 and parB)	((dnaQ or NonEssential) and dnaEch1 and dnaX and holB and dnaN and RHE_CH01457 and RHE_CH04118 and dnaB and dnaG and dnaK and grpE and ssb and (rnhA or noHit or rnhB) and (polA or NonEssential) and ligA and gyrA and gyrB and parC and parE and topA and RHE_CH01490 and dnaA and priA and parA2 and parB)	((dnaQ or NonEssential) and dnaE and Atu0096 and holB and dnaN and holC and Atu2750 and dnaC and dnaG and dnaK and grpE and ssb and (Atu0776 or noHit or rnhB) and (polA or NonEssential) and Atu2082 and gyrA and gyrB and parC and gyrB and topA and Atu1143 and dnaA and priA and parA and parB1)	((RL73_00150 or NonEssential) and RL73_02990 and RL73_00465 and RL73_04060 and RL73_00750 and RL73_01390 and RL73_00210 and RL73_01760 and RL73_02995 and dnaK and noHit and RL73_02065 and (RL73_00270 or noHit or RL73_02000) and (RL73_04700 or NonEssential) and RL73_03125 and RL73_02070 and RL73_00135 and RL73_05550 and noHit and noHit and RL73_05450 and RL73_06030 and RL73_05975 and RL73_00200 an…	((mlr4495 or NonEssential) and mll0870 and mlr5503 and mll0423 and mll5580 and mlr7869 and mlr4475 and mll7836 and mll2467 and mll4757 and mll3220 and mll0743 and (mlr7504 or noHit or mll7416) and (mlr3298 or NonEssential) and mll1539 and mll0732 and mll5188 and mlr8360 and mlr0901 and mlr0839 and mlr7968 and mll5581 and mll4071 and mll4479 and mll4477)	((dnaQ or NonEssential) and dnaE and dnaX and holB and dnaN and DK53_695 and holA and dnaB and dnaG and dnaK and DK53_180 and ssb4 and (DK53_499 or noHit or DK53_418) and (polA or NonEssential) and ligA and gyrA and gyrB and parC and parE and topA and noHit and dnaA and priA and DK53_1976 and DK53_1975)	((dnaQ or NonEssential) and dnaE and bll8116 and bll4517 and dnaN and blr4109 and blr0629 and alr and dnaG and dnaK and grpE and ssb and (blr1316 or noHit or rnhB) and (polA or NonEssential) and ligA and gyrA and gyrB and gyrA and gyrB and topA and bll4123 and dnaA and priA and parA and noHit)
RNA biosynthesis
rxn13784	RNA_transcription_c0	cpd00002_c0 (121.91) + cpd00062_c0 (21.91) + cpd00052_c0 (28.09) + cpd00038_c0 (28.09) + cpd00001_c0 (100) ==> cpd00008_c0 (100) + cpd00009_c0 (100) + cpd00012_c0 (100) + cpd00067_c0 (100) + cpd11613_c0 (1)	ATP_c0 (121.91) + UTP_c0 (21.91) + CTP_c0 (28.09) + GTP_c0 (28.09) + H2O_c0 (100) ==> ADP_c0 (100) + Phosphate_c0 (100) + PPi_c0 (100) + H_c0 (100) + RNA (1)	FALSE			(smc01285 and smc01317 and smc01316 and smc02408 and smc01563 and (smc01218 or sma0149) and smc02912 and smc01778 and smc01322 and smc02796 and smc02700)	(RpoA and RpoB and RpoC and RpoZ and RpoD and (GreA or Sma0149) and NusA and NusB and NusG and Rho and Smc02700)	Experimental but incomplete	Neilson and Brown 1985; Peck et al 2002; Wells and Long 2003; Rushing and Long 1995; Cowie et al 2006; This study	In this Tn-seq data, greA was only essential in the absence of pSymA and pSymB, suggesting both that the product of greA has the annotated function and that there is a second copy on pSymA or pSymB, with the most likey candidate being sma0149.		(Smed_1010 and Smed_0978 and Smed_0979 and Smed_0676 and Smed_2223 and (Smed_1254 or Smed_5139) and Smed_3439 and Smed_0822 and Smed_0973 and Smed_3206 and Smed_2272)	(rpoA and rpoB and rpoC and noHit and rpoD and (greA or NGR_c03700) and nusA and nusB and nusG and rho and NGR_c23320)	(rpoA and rpoB and rpoC and noHit and rpoD and (greA or OV14_3344) and nusA and nusB and nusG and rho and OV14_3826)	(rpoA and rpoB and rpoC and RL1505 and rpoD and (greA or RL2859) and nusA and nusB and nusG and rho and papS)	(rpoA and rpoB and rpoC and rpoZ and sigA and (greA or greB) and nusA and nusB and nusG and rho and papS)	(rpoA and rpoB and rpoC and rnpO and rpoD and (greA or greB) and nusA and nusB and nusG and rho and papS)	(RL73_02305 and RL73_04265 and noHit and RL73_03555 and RL73_06755 and (RL73_00830 or noHit) and RL73_00330 and RL73_05505 and RL73_04290 and RL73_00180 and RL73_03615)	(mlr0325 and mlr0276 and mlr0277 and mlr7753 and mll2466 and (mll2568 or mlr7618) and mlr5551 and mlr8411 and mlr0270 and mll4485 and mll2726)	(rpoA and rpoB and DK53_1223 and rpoZ and rpoD and (greA or DK53_572) and nusA and nusB and nusG and rho and DK53_1510)	(rpoA and rpoB and rpoC and rnpO and sigA and (greA or greB) and nusA and nusB and nusG and rho and papS)
Saturated fatty acid biosynthesis
rxn00792	Biotin:CoA ligase	cpd00012_c0 (1) + cpd03517_c0 (1) <==> cpd00067_c0 (1) + cpd00002_c0 (1) + cpd00104_c0 (1)	PPi_c0 (1) + Biotinyl_5_AMP_c0 (1) <==> H_c0 (1) + ATP_c0 (1) + Biotin_c0 (1)	TRUE	R01074	6.3.4.15	smc01928	BirA	Experimental	This study			Smed_0904	birA	birA	birA	birA	birA	RL73_01535	mll1351	DK53_817	birA
rxn06864	Biotinyl-5'-AMP:apo-[carboxylase] ligase (AMP-forming)	cpd03517_c0 (1) + cpd12847_c0 (1) ==> cpd00018_c0 (1) + cpd12848_c0 (1)	Biotinyl_5_AMP_c0 (1) + Apo-[carboxylase] (1) ==> AMP_c0 (1) + Holo_carboxylase_c0 (1)	FALSE	R05145	6.3.4.15	smc01928	BirA	Experimental	This study			Smed_0904	birA	birA	birA	birA	birA	RL73_01535	mll1351	DK53_817	birA
rxn06672	acetyl-CoA carboxylase / biotin carboxylase reaction 1	cpd00002_c0 (1) + cpd12848_c0 (1) + cpd00242_c0 (1) <==> cpd00067_c0 (1) + cpd00009_c0 (1) + cpd12543_c0 (1) + cpd00008_c0 (1)	ATP_c0 (1) + Holo_carboxylase_c0 (1) + H2CO3_c0 (1) <==> H_c0 (1) + Phosphate_c0 (1) + Carboxybiotin_carboxyl_carrier_protein_c0 (1) + ADP_c0 (1)	TRUE	R04385	6.3.4.14	(smc01345 and smc01344)	(AccC and AccB)	Experimental	Nogales et al 2010; Cowie et al 2006; This study			(Smed_0952 and Smed_0953)	(accB and accC2)	(accB and accC2)	(accC1 and accB1)	(accCch and accBch)	(accC and accB)	(RL73_04590 and RL73_04585)	(mll0203 and mll0206)	(accC and accB)	(accC and accB)
rxn06673	acetyl-CoA carboxylase / biotin carboxylase reaction 2	cpd12543_c0 (1) + cpd00022_c0 (1) ==> cpd12848_c0 (1) + cpd00070_c0 (1)	Carboxybiotin_carboxyl_carrier_protein_c0 (1) + Acetyl_CoA_c0 (1) ==> Holo_carboxylase_c0 (1) + Malonyl_CoA_c0 (1)	FALSE	R04386	6.4.1.2	(smc02764 and smc00690)	(AccD and AccA)	Experimental	Nogales et al 2010; This study			(Smed_3239 and Smed_2568)	(accD and accA)	(accD and accA)	(RL0023 and accA)	(accD and accA)	(accD and accA)	(RL73_00125 and RL73_05755)	(mlr5075 and mlr3576)	(accD and accA)	(accD and accA)
rxn05465	malonyl-ACP:[acyl-carrier-protein] transferase	cpd00070_c0 (1) + cpd11493_c0 (1) <==> cpd00010_c0 (1) + cpd11492_c0 (1)	Malonyl_CoA_c0 (1) + ACP_c0 (1) <==> CoA_c0 (1) + Malonyl_acyl_carrierprotein__c0 (1)	TRUE	R01626	2.3.1.39	(smc00571 and smc00573)	(FabD and AcpP)	Experimental but incomplete	Platt et al 1990; López-Lara and Geiger 2000; This study	In this Tn-seq data, fabD did not appear to be absolutely essential, particularly in strains lacking pSymA and pSymB. There may therefore be another enzyme encoded by the S. meliloti chromosome capable of performing this reaction, but at a slow rate. A possible candidate is RkpA.		(Smed_0744 and Smed_0746)	(NGR_c08900 and NGR_c08920)	(OV14_2162 and OV14_2164)	(fabD and acpP)	(fabD and acpP)	(fabD and acpP)	(RL73_05150 and RL73_05140)	(mlr7849 and msr7851)	(fabD and acpP)	(fabD and acpP)
rxn08766	Acetoacetyl-ACP synthase	cpd00022_c0 (1) + cpd00067_c0 (1) + cpd11492_c0 (1) <==> cpd00010_c0 (1) + cpd00011_c0 (1) + cpd11488_c0 (1)	Acetyl_CoA_c0 (1) + H_c0 (1) + Malonyl_acyl_carrierprotein__c0 (1) <==> CoA_c0 (1) + CO2_c0 (1) + Acetoacetyl_ACP_c0 (1)	TRUE	R10707	2.3.1.180	smc01785	FabH	Experimental	This study			Smed_0829	fabH2	fabH2	fabH	fabH	fabH	RL73_01985	mlr8424	fabH	fabH
rxn05339	Acetoacetyl-ACP dehydrogenase	cpd00006_c0 (1) + cpd11478_c0 (1) <==> cpd00067_c0 (1) + cpd11488_c0 (1) + cpd00005_c0 (1)	NADP_c0 (1) + R_3_Hydroxybutanoyl_acyl_carrier_protein_c0 (1) <==> H_c0 (1) + Acetoacetyl_ACP_c0 (1) + NADPH_c0 (1)	TRUE	R02767	1.1.1.100	smc00572	FabG	Experimental	Mao et al 2016; This study			Smed_0745	NGR_c08910	OV14_2163	fabG	fabG2	fabG	RL73_05145	mlr7850	fabG	fabG
rxn05329	(R)-3-hydroxy-butanoyl-ACP dehydratase	cpd11478_c0 (1) <==> cpd00001_c0 (1) + cpd11465_c0 (1)	R_3_Hydroxybutanoyl_acyl_carrier_protein_c0 (1) <==> H2O_c0 (1) + But_2_enoyl_acyl_carrier_protein_c0 (1)	TRUE	R10208	4.2.1.59	smc02092	FabZ	Experimental but incomplete	This study	Only FabZ was added to this reaction based on the differences in affinities for the substrate of the E. coli proteins (Heath and Rock 1996), but FabA may also catalyze this reaction		Smed_1140	fabZ	fabZ	fabZ	fabZ	fabZ	RL73_00425	mll0634	fabZ	fabZ
rxn05322	But-2-enoyl-ACP reductase	cpd00067_c0 (1) + cpd00004_c0 (1) + cpd11465_c0 (1) ==> cpd11464_c0 (1) + cpd00003_c0 (1)	H_c0 (1) + NADH_c0 (1) + But_2_enoyl_acyl_carrier_protein_c0 (1) ==> Butyryl_ACP_c0 (1) + NAD_c0 (1)	FALSE	R01403	1.3.1.9	smc00326	FabI2	Experimental but incomplete	Cowie et al; This study	There are two fabI genes in S. meliloti, and in this Tn-seq data, both appeared essential suggesting they likely have separate functions. As fabI2 is located next to fabB and fabA, we predict that FabI2 functions as the general enzyme associated with this reaction, while FabI1 is involved in very long chain fatty acid biosynthesis.		Smed_3448	fabI2	fabI2	fabI1	fabI1	fabI	RL73_00700	mll5565	DK53_3	fabI
rxn05346	3-oxohexanoyl-ACP synthase	cpd11464_c0 (1) + cpd00067_c0 (1) + cpd11492_c0 (1) ==> cpd11493_c0 (1) + cpd00011_c0 (1) + cpd11486_c0 (1)	Butyryl_ACP_c0 (1) + H_c0 (1) + Malonyl_acyl_carrierprotein__c0 (1) ==> ACP_c0 (1) + CO2_c0 (1) + 3_Oxohexanoyl_acp_c0 (1)	FALSE	R02768	2.3.1.179 and 2.3.1.41	(smc00574 and smc00327)	(FabF or FabB)	Experimental but incomplete	This study	FabF and FabB are annotated as catalyzing the same reaction, but both were essential in this Tn-seq data. Therefore they presumably have distinct, but likely overlapping, substrate specificity. Therefore, in most cases the reactions are annotated as FabF or FabB since it has not been studies in S. meliloti the substrate specificies of these enzymes. There are only two reactions where we have put …		(Smed_0747 and Smed_3449)	(NGR_c08930 and fabB)	(OV14_2165 and fabB)	(fabF1 and fabB)	(fabF1 and fabB)	(fabF and fabB)	(RL73_05135 and RL73_00705)	(mlr7852 and mll5566)	(fabF and DK53_4)	(fabF and fabB)
rxn05337	3-oxohexanoyl-ACP dehydrogenase	cpd00006_c0 (1) + cpd11479_c0 (1) <==> cpd00067_c0 (1) + cpd11486_c0 (1) + cpd00005_c0 (1)	NADP_c0 (1) + D_3_Hydroxyhexanoyl_acp_c0 (1) <==> H_c0 (1) + 3_Oxohexanoyl_acp_c0 (1) + NADPH_c0 (1)	TRUE	R02767	1.1.1.100	smc00572	FabG	Experimental	Mao et al 2016; This study			Smed_0745	NGR_c08910	OV14_2163	fabG	fabG2	fabG	RL73_05145	mlr7850	fabG	fabG
rxn05330	(R)-3-hydroxy-hexanoyl-ACP dehydratase	cpd11479_c0 (1) <==> cpd00001_c0 (1) + cpd11473_c0 (1)	D_3_Hydroxyhexanoyl_acp_c0 (1) <==> H2O_c0 (1) + 2E_Hexenoyl_acp_c0 (1)	TRUE	R10208	4.2.1.59	(smc02092 or smc00328)	(FabZ or FabA)	Experimental but incomplete	This study	Both FabZ and FabA were added to this reaction based on the differences in affinities for the substrate of the E. coli proteins (Heath and Rock 1996), but this may not be the case in S. meliloti.		(Smed_1140 or Smed_3450)	(fabZ or fabA)	(fabZ or fabA)	(fabZ or fabA)	(fabZ or fabA)	(fabZ or fabA)	(RL73_00425 or RL73_00710)	(mll0634 or mll5569)	(fabZ or fabA)	(fabZ or fabA)
rxn05326	trans-Hex-2-enoyl-ACP reductase	cpd00067_c0 (1) + cpd00004_c0 (1) + cpd11473_c0 (1) ==> cpd11472_c0 (1) + cpd00003_c0 (1)	H_c0 (1) + NADH_c0 (1) + 2E_Hexenoyl_acp_c0 (1) ==> Hexanoyl_ACP_c0 (1) + NAD_c0 (1)	FALSE	R01403	1.3.1.9	smc00326	FabI2	Experimental but incomplete	Cowie et al; This study	There are two fabI genes in S. meliloti, and in this Tn-seq data, both appeared essential suggesting they likely have separate functions. As fabI2 is located next to fabB and fabA, we predict that FabI2 functions as the general enzyme associated with this reaction, while FabI1 is involved in very long chain fatty acid biosynthesis.		Smed_3448	fabI2	fabI2	fabI1	fabI1	fabI	RL73_00700	mll5565	DK53_3	fabI
rxn05350	3-oxooctanoyl-ACP synthase	cpd00067_c0 (1) + cpd11472_c0 (1) + cpd11492_c0 (1) ==> cpd11493_c0 (1) + cpd00011_c0 (1) + cpd11490_c0 (1)	H_c0 (1) + Hexanoyl_ACP_c0 (1) + Malonyl_acyl_carrierprotein__c0 (1) ==> ACP_c0 (1) + CO2_c0 (1) + 3_oxooctanoyl_acp_c0 (1)	FALSE	R02768	2.3.1.179 and 2.3.1.41	(smc00574 and smc00327)	(FabF or FabB)	Experimental but incomplete	This study	FabF and FabB are annotated as catalyzing the same reaction, but both were essential in this Tn-seq data. Therefore they presumably have distinct, but likely overlapping, substrate specificity. Therefore, in most cases the reactions are annotated as FabF or FabB since it has not been studies in S. meliloti the substrate specificies of these enzymes. There are only two reactions where we have put …		(Smed_0747 and Smed_3449)	(NGR_c08930 and fabB)	(OV14_2165 and fabB)	(fabF1 and fabB)	(fabF1 and fabB)	(fabF and fabB)	(RL73_05135 and RL73_00705)	(mlr7852 and mll5566)	(fabF and DK53_4)	(fabF and fabB)
rxn05341	3-oxooctanoyl-ACP dehydrogenase	cpd11483_c0 (1) + cpd00006_c0 (1) <==> cpd00067_c0 (1) + cpd11490_c0 (1) + cpd00005_c0 (1)	R_3_Hydroxyoctanoyl_acyl_carrier_protein_c0 (1) + NADP_c0 (1) <==> H_c0 (1) + 3_oxooctanoyl_acp_c0 (1) + NADPH_c0 (1)	TRUE	R02767	1.1.1.100	smc00572	FabG	Experimental	Mao et al 2016; This study			Smed_0745	NGR_c08910	OV14_2163	fabG	fabG2	fabG	RL73_05145	mlr7850	fabG	fabG
rxn05334	(R)-3-hydroxy-octanoyl-ACP dehydratase	cpd11483_c0 (1) <==> cpd11471_c0 (1) + cpd00001_c0 (1)	R_3_Hydroxyoctanoyl_acyl_carrier_protein_c0 (1) <==> 2E_Octenoyl_acp_c0 (1) + H2O_c0 (1)	TRUE	R10208	4.2.1.59	(smc02092 or smc00328)	(FabZ or FabA)	Experimental but incomplete	This study	Both FabZ and FabA were added to this reaction based on the differences in affinities for the substrate of the E. coli proteins (Heath and Rock 1996), but this may not be the case in S. meliloti.		(Smed_1140 or Smed_3450)	(fabZ or fabA)	(fabZ or fabA)	(fabZ or fabA)	(fabZ or fabA)	(fabZ or fabA)	(RL73_00425 or RL73_00710)	(mll0634 or mll5569)	(fabZ or fabA)	(fabZ or fabA)
rxn05325	trans-Oct-2-enoyl-ACP reductase	cpd11471_c0 (1) + cpd00067_c0 (1) + cpd00004_c0 (1) ==> cpd11470_c0 (1) + cpd00003_c0 (1)	2E_Octenoyl_acp_c0 (1) + H_c0 (1) + NADH_c0 (1) ==> Octanoyl_ACP_c0 (1) + NAD_c0 (1)	FALSE	R01403	1.3.1.9	smc00326	FabI2	Experimental but incomplete	Cowie et al; This study	There are two fabI genes in S. meliloti, and in this Tn-seq data, both appeared essential suggesting they likely have separate functions. As fabI2 is located next to fabB and fabA, we predict that FabI2 functions as the general enzyme associated with this reaction, while FabI1 is involved in very long chain fatty acid biosynthesis.		Smed_3448	fabI2	fabI2	fabI1	fabI1	fabI	RL73_00700	mll5565	DK53_3	fabI
rxn05343	3-oxodecanoyl-ACP synthase	cpd00067_c0 (1) + cpd11492_c0 (1) + cpd11470_c0 (1) ==> cpd11493_c0 (1) + cpd00011_c0 (1) + cpd11487_c0 (1)	H_c0 (1) + Malonyl_acyl_carrierprotein__c0 (1) + Octanoyl_ACP_c0 (1) ==> ACP_c0 (1) + CO2_c0 (1) + 3_oxodecanoyl_acp_c0 (1)	FALSE	R02768	2.3.1.179 and 2.3.1.41	(smc00574 and smc00327)	(FabF or FabB)	Experimental but incomplete	This study	FabF and FabB are annotated as catalyzing the same reaction, but both were essential in this Tn-seq data. Therefore they presumably have distinct, but likely overlapping, substrate specificity. Therefore, in most cases the reactions are annotated as FabF or FabB since it has not been studies in S. meliloti the substrate specificies of these enzymes. There are only two reactions where we have put …		(Smed_0747 and Smed_3449)	(NGR_c08930 and fabB)	(OV14_2165 and fabB)	(fabF1 and fabB)	(fabF1 and fabB)	(fabF and fabB)	(RL73_05135 and RL73_00705)	(mlr7852 and mll5566)	(fabF and DK53_4)	(fabF and fabB)
rxn05338	3-oxydecanoyl-ACP dehydrogenase	cpd11482_c0 (1) + cpd00006_c0 (1) <==> cpd00067_c0 (1) + cpd11487_c0 (1) + cpd00005_c0 (1)	R_3_Hydroxydecanoyl_acyl_carrier_protein_c0 (1) + NADP_c0 (1) <==> H_c0 (1) + 3_oxodecanoyl_acp_c0 (1) + NADPH_c0 (1)	TRUE	R02767	1.1.1.100	smc00572	FabG	Experimental	Mao et al 2016; This study			Smed_0745	NGR_c08910	OV14_2163	fabG	fabG2	fabG	RL73_05145	mlr7850	fabG	fabG
rxn05333	(R)-3-hydroxy-decanoyl-ACP dehydratase	cpd11482_c0 (1) <==> cpd11475_c0 (1) + cpd00001_c0 (1)	R_3_Hydroxydecanoyl_acyl_carrier_protein_c0 (1) <==> 2E_Decenoyl_acp_c0 (1) + H2O_c0 (1)	TRUE	R10208	4.2.1.59	(smc02092 or smc00328)	(FabZ or FabA)	Experimental but incomplete	This study	Both FabZ and FabA were added to this reaction based on the differences in affinities for the substrate of the E. coli proteins (Heath and Rock 1996), but this may not be the case in S. meliloti.		(Smed_1140 or Smed_3450)	(fabZ or fabA)	(fabZ or fabA)	(fabZ or fabA)	(fabZ or fabA)	(fabZ or fabA)	(RL73_00425 or RL73_00710)	(mll0634 or mll5569)	(fabZ or fabA)	(fabZ or fabA)
rxn05327	trans-Dec-2-enoyl-ACP reductase	cpd11475_c0 (1) + cpd00067_c0 (1) + cpd00004_c0 (1) ==> cpd11474_c0 (1) + cpd00003_c0 (1)	2E_Decenoyl_acp_c0 (1) + H_c0 (1) + NADH_c0 (1) ==> Decanoyl_ACP_c0 (1) + NAD_c0 (1)	FALSE	R01403	1.3.1.9	smc00326	FabI2	Experimental but incomplete	Cowie et al; This study	There are two fabI genes in S. meliloti, and in this Tn-seq data, both appeared essential suggesting they likely have separate functions. As fabI2 is located next to fabB and fabA, we predict that FabI2 functions as the general enzyme associated with this reaction, while FabI1 is involved in very long chain fatty acid biosynthesis.		Smed_3448	fabI2	fabI2	fabI1	fabI1	fabI	RL73_00700	mll5565	DK53_3	fabI
rxn05348	3-oxo-dodecanoyl-ACP synthase	cpd11474_c0 (1) + cpd00067_c0 (1) + cpd11492_c0 (1) ==> cpd11489_c0 (1) + cpd11493_c0 (1) + cpd00011_c0 (1)	Decanoyl_ACP_c0 (1) + H_c0 (1) + Malonyl_acyl_carrierprotein__c0 (1) ==> 3_oxododecanoyl_acp_c0 (1) + ACP_c0 (1) + CO2_c0 (1)	FALSE	R02768	2.3.1.179 and 2.3.1.41	(smc00574 and smc00327)	(FabF or FabB)	Experimental but incomplete	This study	FabF and FabB are annotated as catalyzing the same reaction, but both were essential in this Tn-seq data. Therefore they presumably have distinct, but likely overlapping, substrate specificity. Therefore, in most cases the reactions are annotated as FabF or FabB since it has not been studies in S. meliloti the substrate specificies of these enzymes. There are only two reactions where we have put …		(Smed_0747 and Smed_3449)	(NGR_c08930 and fabB)	(OV14_2165 and fabB)	(fabF1 and fabB)	(fabF1 and fabB)	(fabF and fabB)	(RL73_05135 and RL73_00705)	(mlr7852 and mll5566)	(fabF and DK53_4)	(fabF and fabB)
rxn05340	3-oxo-dodecanoyl-ACP dehydrogenase	cpd00006_c0 (1) + cpd11480_c0 (1) <==> cpd11489_c0 (1) + cpd00067_c0 (1) + cpd00005_c0 (1)	NADP_c0 (1) + D_3_Hydroxydodecanoyl_acp_c0 (1) <==> 3_oxododecanoyl_acp_c0 (1) + H_c0 (1) + NADPH_c0 (1)	TRUE	R02767	1.1.1.100	smc00572	FabG	Experimental	Mao et al 2016; This study			Smed_0745	NGR_c08910	OV14_2163	fabG	fabG2	fabG	RL73_05145	mlr7850	fabG	fabG
rxn05331	(R)-3-hydroxy-dodecanoyl-ACP dehydratase	cpd11480_c0 (1) <==> cpd00001_c0 (1) + cpd11469_c0 (1)	D_3_Hydroxydodecanoyl_acp_c0 (1) <==> H2O_c0 (1) + 2E_Dodecenoyl_acp_c0 (1)	TRUE	R10208	4.2.1.59	(smc02092 or smc00328)	(FabZ or FabA)	Experimental but incomplete	This study	Both FabZ and FabA were added to this reaction based on the differences in affinities for the substrate of the E. coli proteins (Heath and Rock 1996), but this may not be the case in S. meliloti.		(Smed_1140 or Smed_3450)	(fabZ or fabA)	(fabZ or fabA)	(fabZ or fabA)	(fabZ or fabA)	(fabZ or fabA)	(RL73_00425 or RL73_00710)	(mll0634 or mll5569)	(fabZ or fabA)	(fabZ or fabA)
rxn05324	trans-Dodec-2-enoyl-ACP reductase	cpd00067_c0 (1) + cpd11469_c0 (1) + cpd00004_c0 (1) ==> cpd11468_c0 (1) + cpd00003_c0 (1)	H_c0 (1) + 2E_Dodecenoyl_acp_c0 (1) + NADH_c0 (1) ==> Dodecanoyl_ACP_c0 (1) + NAD_c0 (1)	FALSE	R01403	1.3.1.9	smc00326	FabI2	Experimental but incomplete	Cowie et al; This study	There are two fabI genes in S. meliloti, and in this Tn-seq data, both appeared essential suggesting they likely have separate functions. As fabI2 is located next to fabB and fabA, we predict that FabI2 functions as the general enzyme associated with this reaction, while FabI1 is involved in very long chain fatty acid biosynthesis.		Smed_3448	fabI2	fabI2	fabI1	fabI1	fabI	RL73_00700	mll5565	DK53_3	fabI
rxn05345	3-oxo-tetradecanoyl-ACP synthase	cpd00067_c0 (1) + cpd11492_c0 (1) + cpd11468_c0 (1) <==> cpd11493_c0 (1) + cpd00011_c0 (1) + cpd11491_c0 (1)	H_c0 (1) + Malonyl_acyl_carrierprotein__c0 (1) + Dodecanoyl_ACP_c0 (1) <==> ACP_c0 (1) + CO2_c0 (1) + 3_oxotetradecanoyl_acp_c0 (1)	TRUE	R02768	2.3.1.179 and 2.3.1.41	(smc00574 and smc00327)	(FabF or FabB)	Experimental but incomplete	This study	FabF and FabB are annotated as catalyzing the same reaction, but both were essential in this Tn-seq data. Therefore they presumably have distinct, but likely overlapping, substrate specificity. Therefore, in most cases the reactions are annotated as FabF or FabB since it has not been studies in S. meliloti the substrate specificies of these enzymes. There are only two reactions where we have put …		(Smed_0747 and Smed_3449)	(NGR_c08930 and fabB)	(OV14_2165 and fabB)	(fabF1 and fabB)	(fabF1 and fabB)	(fabF and fabB)	(RL73_05135 and RL73_00705)	(mlr7852 and mll5566)	(fabF and DK53_4)	(fabF and fabB)
rxn05342	3-oxo-tetradecanoyl-ACP dehydrogenase	cpd11484_c0 (1) + cpd00006_c0 (1) <==> cpd00067_c0 (1) + cpd11491_c0 (1) + cpd00005_c0 (1)	HMA_c0 (1) + NADP_c0 (1) <==> H_c0 (1) + 3_oxotetradecanoyl_acp_c0 (1) + NADPH_c0 (1)	TRUE	R02767	1.1.1.100	smc00572	FabG	Experimental	Mao et al 2016; This study			Smed_0745	NGR_c08910	OV14_2163	fabG	fabG2	fabG	RL73_05145	mlr7850	fabG	fabG
rxn05335	(R)-3-hydroxy-tetradecanoyl-ACP dehydratase	cpd11484_c0 (1) <==> cpd11467_c0 (1) + cpd00001_c0 (1)	HMA_c0 (1) <==> 2E_Tetradecenoyl_acp_c0 (1) + H2O_c0 (1)	TRUE	R10208	4.2.1.59	(smc02092 or smc00328)	(FabZ or FabA)	Experimental but incomplete	This study	Both FabZ and FabA were added to this reaction based on the differences in affinities for the substrate of the E. coli proteins (Heath and Rock 1996), but this may not be the case in S. meliloti.		(Smed_1140 or Smed_3450)	(fabZ or fabA)	(fabZ or fabA)	(fabZ or fabA)	(fabZ or fabA)	(fabZ or fabA)	(RL73_00425 or RL73_00710)	(mll0634 or mll5569)	(fabZ or fabA)	(fabZ or fabA)
rxn05323	trans-Tetradec-2-enoyl-ACP reductase	cpd00067_c0 (1) + cpd11467_c0 (1) + cpd00004_c0 (1) ==> cpd00003_c0 (1) + cpd11466_c0 (1)	H_c0 (1) + 2E_Tetradecenoyl_acp_c0 (1) + NADH_c0 (1) ==> NAD_c0 (1) + Myristoyl_ACP_c0 (1)	FALSE	R01403	1.3.1.9	smc00326	FabI2	Experimental but incomplete	Cowie et al; This study	There are two fabI genes in S. meliloti, and in this Tn-seq data, both appeared essential suggesting they likely have separate functions. As fabI2 is located next to fabB and fabA, we predict that FabI2 functions as the general enzyme associated with this reaction, while FabI1 is involved in very long chain fatty acid biosynthesis.		Smed_3448	fabI2	fabI2	fabI1	fabI1	fabI	RL73_00700	mll5565	DK53_3	fabI
rxn05344	3-oxohexadecanoyl-ACP synthase	cpd00067_c0 (1) + cpd11492_c0 (1) + cpd11466_c0 (1) ==> cpd11493_c0 (1) + cpd11485_c0 (1) + cpd00011_c0 (1)	H_c0 (1) + Malonyl_acyl_carrierprotein__c0 (1) + Myristoyl_ACP_c0 (1) ==> ACP_c0 (1) + 3_oxohexadecanoyl_acp_c0 (1) + CO2_c0 (1)	FALSE	R02768	2.3.1.179 and 2.3.1.41	(smc00574 and smc00327)	(FabF or FabB)	Experimental but incomplete	This study	FabF and FabB are annotated as catalyzing the same reaction, but both were essential in this Tn-seq data. Therefore they presumably have distinct, but likely overlapping, substrate specificity. Therefore, in most cases the reactions are annotated as FabF or FabB since it has not been studies in S. meliloti the substrate specificies of these enzymes. There are only two reactions where we have put …		(Smed_0747 and Smed_3449)	(NGR_c08930 and fabB)	(OV14_2165 and fabB)	(fabF1 and fabB)	(fabF1 and fabB)	(fabF and fabB)	(RL73_05135 and RL73_00705)	(mlr7852 and mll5566)	(fabF and DK53_4)	(fabF and fabB)
rxn05336	3-oxohexadecanoyl-ACP dehydrogenase	cpd11481_c0 (1) + cpd00006_c0 (1) <==> cpd11485_c0 (1) + cpd00067_c0 (1) + cpd00005_c0 (1)	R_3_hydroxypalmitoyl_acyl_carrierprotein__c0 (1) + NADP_c0 (1) <==> 3_oxohexadecanoyl_acp_c0 (1) + H_c0 (1) + NADPH_c0 (1)	TRUE	R02767	1.1.1.100	smc00572	FabG	Experimental	Mao et al 2016; This study			Smed_0745	NGR_c08910	OV14_2163	fabG	fabG2	fabG	RL73_05145	mlr7850	fabG	fabG
rxn05332	(R)-3-hydroxy-hexadecanoyl-ACP dehydratase	cpd11481_c0 (1) <==> cpd00001_c0 (1) + cpd11477_c0 (1)	R_3_hydroxypalmitoyl_acyl_carrierprotein__c0 (1) <==> H2O_c0 (1) + 2E_Hexadecenoyl_acp_c0 (1)	TRUE	R10208	4.2.1.59	(smc02092 or smc00328)	(FabZ or FabA)	Experimental but incomplete	This study	Both FabZ and FabA were added to this reaction based on the differences in affinities for the substrate of the E. coli proteins (Heath and Rock 1996), but this may not be the case in S. meliloti.		(Smed_1140 or Smed_3450)	(fabZ or fabA)	(fabZ or fabA)	(fabZ or fabA)	(fabZ or fabA)	(fabZ or fabA)	(RL73_00425 or RL73_00710)	(mll0634 or mll5569)	(fabZ or fabA)	(fabZ or fabA)
rxn05328	trans-Hexadec-2-enoyl-ACP reductase	cpd00067_c0 (1) + cpd00004_c0 (1) + cpd11477_c0 (1) ==> cpd11476_c0 (1) + cpd00003_c0 (1)	H_c0 (1) + NADH_c0 (1) + 2E_Hexadecenoyl_acp_c0 (1) ==> hexadecanoyl_acp_c0 (1) + NAD_c0 (1)	FALSE	R01403	1.3.1.9	smc00326	FabI2	Experimental but incomplete	Cowie et al; This study	There are two fabI genes in S. meliloti, and in this Tn-seq data, both appeared essential suggesting they likely have separate functions. As fabI2 is located next to fabB and fabA, we predict that FabI2 functions as the general enzyme associated with this reaction, while FabI1 is involved in very long chain fatty acid biosynthesis.		Smed_3448	fabI2	fabI2	fabI1	fabI1	fabI	RL73_00700	mll5565	DK53_3	fabI
rxn05460	3-oxooctadecanoyl-ACP synthase	cpd00067_c0 (1) + cpd11476_c0 (1) + cpd11492_c0 (1) ==> cpd11493_c0 (1) + cpd00011_c0 (1) + cpd11570_c0 (1)	H_c0 (1) + hexadecanoyl_acp_c0 (1) + Malonyl_acyl_carrierprotein__c0 (1) ==> ACP_c0 (1) + CO2_c0 (1) + 3_Oxooctodecanoyl_ACP_c0 (1)	FALSE	R02768	2.3.1.179 and 2.3.1.41	(smc00574 and smc00327)	(FabF or FabB)	Experimental but incomplete	This study	FabF and FabB are annotated as catalyzing the same reaction, but both were essential in this Tn-seq data. Therefore they presumably have distinct, but likely overlapping, substrate specificity. Therefore, in most cases the reactions are annotated as FabF or FabB since it has not been studies in S. meliloti the substrate specificies of these enzymes. There are only two reactions where we have put …		(Smed_0747 and Smed_3449)	(NGR_c08930 and fabB)	(OV14_2165 and fabB)	(fabF1 and fabB)	(fabF1 and fabB)	(fabF and fabB)	(RL73_05135 and RL73_00705)	(mlr7852 and mll5566)	(fabF and DK53_4)	(fabF and fabB)
rxn05461	3-oxooctadecanoyl-ACP dehydrogenase	cpd00067_c0 (1) + cpd11570_c0 (1) + cpd00005_c0 (1) <==> cpd00006_c0 (1) + cpd11571_c0 (1)	H_c0 (1) + 3_Oxooctodecanoyl_ACP_c0 (1) + NADPH_c0 (1) <==> NADP_c0 (1) + 3_Hydroxyoctodecanoyl_ACP_c0 (1)	TRUE	R02767	1.1.1.100	smc00572	FabG	Experimental	Mao et al 2016; This study			Smed_0745	NGR_c08910	OV14_2163	fabG	fabG2	fabG	RL73_05145	mlr7850	fabG	fabG
rxn05462	(R)-3-hydroxy-octadecanoyl-ACP dehydratase	cpd11571_c0 (1) <==> cpd00001_c0 (1) + cpd11572_c0 (1)	3_Hydroxyoctodecanoyl_ACP_c0 (1) <==> H2O_c0 (1) + trans_Octodec_2_enoyl_ACP_c0 (1)	TRUE	R10208	4.2.1.59	(smc02092 or smc00328)	(FabZ or FabA)	Experimental but incomplete	This study	Both FabZ and FabA were added to this reaction based on the differences in affinities for the substrate of the E. coli proteins (Heath and Rock 1996), but this may not be the case in S. meliloti.		(Smed_1140 or Smed_3450)	(fabZ or fabA)	(fabZ or fabA)	(fabZ or fabA)	(fabZ or fabA)	(fabZ or fabA)	(RL73_00425 or RL73_00710)	(mll0634 or mll5569)	(fabZ or fabA)	(fabZ or fabA)
rxn05464	trans-Octadec-2-enoyl-ACP reductase	cpd00067_c0 (1) + cpd00004_c0 (1) + cpd11572_c0 (1) ==> cpd15268_c0 (1) + cpd00003_c0 (1)	H_c0 (1) + NADH_c0 (1) + trans_Octodec_2_enoyl_ACP_c0 (1) ==> Octadecanoyl_ACP_c0 (1) + NAD_c0 (1)	FALSE	R01403	1.3.1.9	smc00326	FabI2	Experimental but incomplete	Cowie et al; This study	There are two fabI genes in S. meliloti, and in this Tn-seq data, both appeared essential suggesting they likely have separate functions. As fabI2 is located next to fabB and fabA, we predict that FabI2 functions as the general enzyme associated with this reaction, while FabI1 is involved in very long chain fatty acid biosynthesis.		Smed_3448	fabI2	fabI2	fabI1	fabI1	fabI	RL73_00700	mll5565	DK53_3	fabI
Unsaturated fatty acid biosynthesis
rxn07455	trans-Dec-2-enoyl-ACP isomerase	cpd11475_c0 (1) <==> cpd12489_c0 (1)	2E_Decenoyl_acp_c0 (1) <==> cis-3-Decenoyl-ACP_c0 (1)	TRUE	R07639	5.3.3.14	smc00328	FabA	Experimental	This study			Smed_3450	fabA	fabA	fabA	fabA	fabA	RL73_00710	mll5569	fabA	fabA
rxnUS1	beta-keto-cis-delta-5-dodecanoyl-ACP synthase	cpd12489_c0 (1) + cpd00067_c0 (1) + cpd11492_c0 (1) ==> cpdUS1_c0 (1) + cpd11493_c0 (1) + cpd00011_c0 (1)	cis-3-Decenoyl-ACP_c0 (1) + H_c0 (1) + Malonyl_acyl_carrierprotein__c0 (1) ==> (5Z)-3-oxo-docec-5-enoyl-ACP_c0 (1) + ACP_c0 (1) + CO2_c0 (1)	FALSE	R04963	2.3.1.41	smc00327	FabB	Experimental but incomplete	This study	FabF and FabB are annotated as catalyzing the same reaction, but both were essential in this Tn-seq data. Therefore they presumably have distinct, but likely overlapping, substrate specificity. Therefore, in most cases the reactions are annotated as FabF or FabB since it has not been studies in S. meliloti the substrate specificies of these enzymes. There are only two reactions where we have put …		Smed_3449	fabB	fabB	fabB	fabB	fabB	RL73_00705	mll5566	DK53_4	fabB
rxnUS2	3-oxo-cis-delta-5-dodecenoyl-ACP dehydrogenase	cpd00006_c0 (1) + cpdUS2_c0 (1) <==> cpdUS1_c0 (1) + cpd00067_c0 (1) + cpd00005_c0 (1)	NADP_c0 (1) + (3R_5Z)-3-hydroxy-dodec-5-enoyl-ACP_c0 (1) <==> (5Z)-3-oxo-docec-5-enoyl-ACP_c0 (1) + H_c0 (1) + NADPH_c0 (1)	TRUE	R02767	1.1.1.100	smc00572	FabG	Experimental	Mao et al 2016; This study			Smed_0745	NGR_c08910	OV14_2163	fabG	fabG2	fabG	RL73_05145	mlr7850	fabG	fabG
rxnUS3	3-hydroxy-cis-delta-5-dodecenoyl-ACP dehydratase	cpdUS2_c0 (1) <==> cpd00001_c0 (1) + cpdUS3_c0 (1)	(3R_5Z)-3-hydroxy-dodec-5-enoyl-ACP_c0 (1) <==> H2O_c0 (1) + (3E_5Z)-dodeca-3_5-dienoyl-ACP_c0 (1)	TRUE	R10208	4.2.1.59	smc02092	FabZ	Experimental but incomplete	This study	Ony FabZ is added to the reactions for unsaturated fatty acid biosynthesis based on the work in E. coli (Heath and Rock 1996).		Smed_1140	fabZ	fabZ	fabZ	fabZ	fabZ	RL73_00425	mll0634	fabZ	fabZ
rxnUS4	cis-delta-5-dodecenoyl-ACP reductase	cpd00067_c0 (1) + cpdUS3_c0 (1) + cpd00004_c0 (1) ==> cpdUS4_c0 (1) + cpd00003_c0 (1)	H_c0 (1) + (3E_5Z)-dodeca-3_5-dienoyl-ACP_c0 (1) + NADH_c0 (1) ==> (5Z)-dodec-5-enoyl-ACP_c0 (1) + NAD_c0 (1)	FALSE	R01403	1.3.1.9	smc00326	FabI2	Experimental but incomplete	Cowie et al; This study	There are two fabI genes in S. meliloti, and in this Tn-seq data, both appeared essential suggesting they likely have separate functions. As fabI2 is located next to fabB and fabA, we predict that FabI2 functions as the general enzyme associated with this reaction, while FabI1 is involved in very long chain fatty acid biosynthesis.		Smed_3448	fabI2	fabI2	fabI1	fabI1	fabI	RL73_00700	mll5565	DK53_3	fabI
rxnUS5	3-oxo-cis-delta-7-tetradecenoyl-ACP synthase	cpd00067_c0 (1) + cpd11492_c0 (1) + cpdUS4_c0 (1) <==> cpd11493_c0 (1) + cpd00011_c0 (1) + cpdUS5_c0 (1)	H_c0 (1) + Malonyl_acyl_carrierprotein__c0 (1) + (5Z)-dodec-5-enoyl-ACP_c0 (1) <==> ACP_c0 (1) + CO2_c0 (1) + 3-oxo-cis-delta-7-tetradecenoyl-ACP_c0 (1)	TRUE	R04726	2.3.1.179 and 2.3.1.41	(smc00574 and smc00327)	(FabF or FabB)	Experimental but incomplete	This study	FabF and FabB are annotated as catalyzing the same reaction, but both were essential in this Tn-seq data. Therefore they presumably have distinct, but likely overlapping, substrate specificity. Therefore, in most cases the reactions are annotated as FabF or FabB since it has not been studies in S. meliloti the substrate specificies of these enzymes. There are only two reactions where we have put …		(Smed_0747 and Smed_3449)	(NGR_c08930 and fabB)	(OV14_2165 and fabB)	(fabF1 and fabB)	(fabF1 and fabB)	(fabF and fabB)	(RL73_05135 and RL73_00705)	(mlr7852 and mll5566)	(fabF and DK53_4)	(fabF and fabB)
rxnUS6	3-oxo-cis-delta-7-tetradecenoyl-ACP dehydrogenase	cpdUS6_c0 (1) + cpd00006_c0 (1) <==> cpd00067_c0 (1) + cpdUS5_c0 (1) + cpd00005_c0 (1)	(3R)-3-hydroxy-cis-delta-7-tetradecenoyl-ACP_c0 (1) + NADP_c0 (1) <==> H_c0 (1) + 3-oxo-cis-delta-7-tetradecenoyl-ACP_c0 (1) + NADPH_c0 (1)	TRUE	R02767	1.1.1.100	smc00572	FabG	Experimental	Mao et al 2016; This study			Smed_0745	NGR_c08910	OV14_2163	fabG	fabG2	fabG	RL73_05145	mlr7850	fabG	fabG
rxnUS7	3-oxo-cis-delta-7-tetradecenoyl-ACP dehydratase	cpdUS6_c0 (1) <==> cpdUS7_c0 (1) + cpd00001_c0 (1)	(3R)-3-hydroxy-cis-delta-7-tetradecenoyl-ACP_c0 (1) <==> trans-delta-3-cis-delta-7-tetradecenoyl-ACP_c0 (1) + H2O_c0 (1)	TRUE	R10208	4.2.1.59	smc02092	FabZ	Experimental but incomplete	This study	Ony FabZ is added to the reactions for unsaturated fatty acid biosynthesis based on the work in E. coli ((Heath and Rock 1996).		Smed_1140	fabZ	fabZ	fabZ	fabZ	fabZ	RL73_00425	mll0634	fabZ	fabZ
rxnUS8	cis-delta-7-tetradecenoyl-ACP reductase	cpd00067_c0 (1) + cpdUS7_c0 (1) + cpd00004_c0 (1) ==> cpd00003_c0 (1) + cpdUS8_c0 (1)	H_c0 (1) + trans-delta-3-cis-delta-7-tetradecenoyl-ACP_c0 (1) + NADH_c0 (1) ==> NAD_c0 (1) + cis-delta-7-tetradecenoyl-ACP_c0 (1)	FALSE	R01403	1.3.1.9	smc00326	FabI2	Experimental but incomplete	Cowie et al; This study	There are two fabI genes in S. meliloti, and in this Tn-seq data, both appeared essential suggesting they likely have separate functions. As fabI2 is located next to fabB and fabA, we predict that FabI2 functions as the general enzyme associated with this reaction, while FabI1 is involved in very long chain fatty acid biosynthesis.		Smed_3448	fabI2	fabI2	fabI1	fabI1	fabI	RL73_00700	mll5565	DK53_3	fabI
rxnUS9	3-oxo-cis-delta-9-hexadecenoyl-ACP synthase	cpd00067_c0 (1) + cpd11492_c0 (1) + cpdUS8_c0 (1) ==> cpd11493_c0 (1) + cpdUS9_c0 (1) + cpd00011_c0 (1)	H_c0 (1) + Malonyl_acyl_carrierprotein__c0 (1) + cis-delta-7-tetradecenoyl-ACP_c0 (1) ==> ACP_c0 (1) + 3-oxo-cis-delta-9-hexadecenoyl-ACP_c0 (1) + CO2_c0 (1)	FALSE	R04968	2.3.1.179 and 2.3.1.41	(smc00574 and smc00327)	(FabF or FabB)	Experimental but incomplete	This study	FabF and FabB are annotated as catalyzing the same reaction, but both were essential in this Tn-seq data. Therefore they presumably have distinct, but likely overlapping, substrate specificity. Therefore, in most cases the reactions are annotated as FabF or FabB since it has not been studies in S. meliloti the substrate specificies of these enzymes. There are only two reactions where we have put …		(Smed_0747 and Smed_3449)	(NGR_c08930 and fabB)	(OV14_2165 and fabB)	(fabF1 and fabB)	(fabF1 and fabB)	(fabF and fabB)	(RL73_05135 and RL73_00705)	(mlr7852 and mll5566)	(fabF and DK53_4)	(fabF and fabB)
rxnUS10	3-oxo-cis-delta-9-hexadecenoyl-ACP dehydrogenase	cpdUS10_c0 (1) + cpd00006_c0 (1) <==> cpdUS9_c0 (1) + cpd00067_c0 (1) + cpd00005_c0 (1)	(3R)-3-hydroxy-cis-delta-9-hexadecenoyl-ACP_c0 (1) + NADP_c0 (1) <==> 3-oxo-cis-delta-9-hexadecenoyl-ACP_c0 (1) + H_c0 (1) + NADPH_c0 (1)	TRUE	R02767	1.1.1.100	smc00572	FabG	Experimental	Mao et al 2016; This study			Smed_0745	NGR_c08910	OV14_2163	fabG	fabG2	fabG	RL73_05145	mlr7850	fabG	fabG
rxnUS11	3-hydroxy-cis-delta-9-hexadecenoyl-ACP dehydratase	cpdUS10_c0 (1) <==> cpd00001_c0 (1) + cpdUS11_c0 (1)	(3R)-3-hydroxy-cis-delta-9-hexadecenoyl-ACP_c0 (1) <==> H2O_c0 (1) + trans-delta-3-cis-delta-9-hexadecenoyl-ACP_c0 (1)	TRUE	R10208	4.2.1.59	smc02092	FabZ	Experimental but incomplete	This study	Ony FabZ is added to the reactions for unsaturated fatty acid biosynthesis based on the work in E. coli ((Heath and Rock 1996).		Smed_1140	fabZ	fabZ	fabZ	fabZ	fabZ	RL73_00425	mll0634	fabZ	fabZ
rxnUS12	palmitoleoyl-ACP reductase	cpd00067_c0 (1) + cpd00004_c0 (1) + cpdUS11_c0 (1) ==> cpdUS12_c0 (1) + cpd00003_c0 (1)	H_c0 (1) + NADH_c0 (1) + trans-delta-3-cis-delta-9-hexadecenoyl-ACP_c0 (1) ==> palmitoleoyl-ACP_c0 (1) + NAD_c0 (1)	FALSE	R01403	1.3.1.9	smc00326	FabI2	Experimental but incomplete	Cowie et al; This study	There are two fabI genes in S. meliloti, and in this Tn-seq data, both appeared essential suggesting they likely have separate functions. As fabI2 is located next to fabB and fabA, we predict that FabI2 functions as the general enzyme associated with this reaction, while FabI1 is involved in very long chain fatty acid biosynthesis.		Smed_3448	fabI2	fabI2	fabI1	fabI1	fabI	RL73_00700	mll5565	DK53_3	fabI
rxnUS13	3-oxo-cis-vaccenoyl-ACP synthase	cpd00067_c0 (1) + cpdUS12_c0 (1) + cpd11492_c0 (1) ==> cpd11493_c0 (1) + cpd00011_c0 (1) + cpdUS13_c0 (1)	H_c0 (1) + palmitoleoyl-ACP_c0 (1) + Malonyl_acyl_carrierprotein__c0 (1) ==> ACP_c0 (1) + CO2_c0 (1) + 3-oxo-cis-vacc-11-enoyl-ACP_c0 (1)	FALSE	R02768	2.3.1.179	smc00574	FabF	Experimental but incomplete	This study	FabF and FabB are annotated as catalyzing the same reaction, but both were essential in this Tn-seq data. Therefore they presumably have distinct, but likely overlapping, substrate specificity. Therefore, in most cases the reactions are annotated as FabF or FabB since it has not been studies in S. meliloti the substrate specificies of these enzymes. There are only two reactions where we have put …		Smed_0747	NGR_c08930	OV14_2165	fabF1	fabF1	fabF	RL73_05135	mlr7852	fabF	fabF
rxnUS14	3-oxo-cis-vaccenoyl-ACP dehydrogenase	cpd00067_c0 (1) + cpdUS13_c0 (1) + cpd00005_c0 (1) <==> cpd00006_c0 (1) + cpdUS14_c0 (1)	H_c0 (1) + 3-oxo-cis-vacc-11-enoyl-ACP_c0 (1) + NADPH_c0 (1) <==> NADP_c0 (1) + (R)-3-hydroxy-cis-vacc-11-enoyl-ACP_c0 (1)	TRUE	R02767	1.1.1.100	smc00572	FabG	Experimental	Mao et al 2016; This study			Smed_0745	NGR_c08910	OV14_2163	fabG	fabG2	fabG	RL73_05145	mlr7850	fabG	fabG
rxnUS15	3-hydroxy-cis-vaccenoyl-ACP dehydratase	cpdUS14_c0 (1) <==> cpd00001_c0 (1) + cpdUS15_c0 (1)	(R)-3-hydroxy-cis-vacc-11-enoyl-ACP_c0 (1) <==> H2O_c0 (1) + (2-trans-11-cis)-vaccen-2-enoyl-ACP_c0 (1)	TRUE	R10208	4.2.1.59	smc02092	FabZ	Experimental but incomplete	This study	Ony FabZ is added to the reactions for unsaturated fatty acid biosynthesis based on the work in E. coli (Heath and Rock 1996).		Smed_1140	fabZ	fabZ	fabZ	fabZ	fabZ	RL73_00425	mll0634	fabZ	fabZ
rxnUS16	cis-vaccen-2-enoyl-ACP reductase	cpd00067_c0 (1) + cpd00004_c0 (1) + cpdUS15_c0 (1) ==> cpdUS16_c0 (1) + cpd00003_c0 (1)	H_c0 (1) + NADH_c0 (1) + (2-trans-11-cis)-vaccen-2-enoyl-ACP_c0 (1) ==> cis-vaccenoyl-ACP_c0 (1) + NAD_c0 (1)	FALSE	R01403	1.3.1.9	smc00326	FabI2	Experimental but incomplete	Cowie et al; This study	There are two fabI genes in S. meliloti, and in this Tn-seq data, both appeared essential suggesting they likely have separate functions. As fabI2 is located next to fabB and fabA, we predict that FabI2 functions as the general enzyme associated with this reaction, while FabI1 is involved in very long chain fatty acid biosynthesis.		Smed_3448	fabI2	fabI2	fabI1	fabI1	fabI	RL73_00700	mll5565	DK53_3	fabI
Very long chain fatty acid biosynthesis
rxnVLCFA1	malonyl-ACP:[acyl-carrier-protein] transferase	cpd00070_c0 (1) + cpd11493_c0 (1) <==> cpd00010_c0 (1) + cpd11492a_c0 (1)	Malonyl_CoA_c0 (1) + ACP_c0 (1) <==> CoA_c0 (1) + Malonyl_acyl_carrier_protein_XL_c0 (1)	TRUE	R01626	2.3.1.39	(smc00571 and smc04278)	(FabD and AcpXL)	Experimental	Sharypova et al 2003; This study	In this Tn-seq data, fabD did not appear to be absolutely essential, particularly in strains lacking pSymA and pSymB. There may therefore be another enzyme encoded by the S. meliloti chromosome capable of performing this reaction, but at a slow rate. A possible candidate is RkpA.		(Smed_0744 and Smed_1741)	(NGR_c08900 and NGR_c18080)	(OV14_2162 and OV14_3175)	(fabD and acpXL)	(fabD and acpXL)	(fabD and acpP)	(RL73_05150 and RL73_04935)	(mlr7849 and noHit)	(fabD and acpXL)	(fabD and acpP)
rxnVLCFA2	Acetoacetyl-ACP synthase VLCFA	cpd00022_c0 (1) + cpd00067_c0 (1) + cpd11492a_c0 (1) <==> cpd00010_c0 (1) + cpd00011_c0 (1) + cpd11488a_c0 (1)	Acetyl_CoA_c0 (1) + H_c0 (1) + Malonyl_acyl_carrier_protein_XL_c0 (1) <==> CoA_c0 (1) + CO2_c0 (1) + Acetoacetyl_ACPXL_c0 (1)	TRUE	R02768	2.3.1.179	(smc04273 and smc04275)	(Smc04273 and FabF2)	Experimental but incomplete	Haag et al 2011; This study	Both of these proteins are expected to have the same protein function, yet both appear essential for VLCA biosynthesis. It is therefore likely that they have different substrate affinities. However, as this has not been studied, both proteins have been added to all reactions and an 'AND' statement used, even though it is likely that both are not required for each reaction		(Smed_1738 and Smed_1739)	(fabF2 and NGR_c18060)	(fabF2 and OV14_3173)	(fabF1 and fabF2)	(RHE_CH02475 and RHE_CH02476)	(fabF and fabF)	(RL73_04920 and RL73_04925)	(mlr1177 and mlr1176)	(DK53_849 and DK53_850)	(bll3808 and fabF)
rxnVLCFA3	Acetoacetyl-ACP dehydrogenase VLCFA	cpd00006_c0 (1) + cpd11478a_c0 (1) <==> cpd00067_c0 (1) + cpd11488a_c0 (1) + cpd00005_c0 (1)	NADP_c0 (1) + R_3_Hydroxybutanoyl_acyl_carrier_proteinXL_c0 (1) <==> H_c0 (1) + Acetoacetyl_ACPXL_c0 (1) + NADPH_c0 (1)	TRUE	R02767	1.1.1.100	smc04270	AdhA2	Experimental	Haag et al 2011; This study			Smed_1737	NGR_c18040	OV14_3171	RL2813	RHE_CH02474	Atu1595	RL73_04915	mlr1178	DK53_848	noHit
rxnVLCFA4	(R)-3-hydroxy-butanoyl-ACP dehydratase VLCFA	cpd11478a_c0 (1) <==> cpd00001_c0 (1) + cpd11465a_c0 (1)	R_3_Hydroxybutanoyl_acyl_carrier_proteinXL_c0 (1) <==> H2O_c0 (1) + But_2_enoyl_acyl_carrier_proteinXL_c0 (1)	TRUE	R10208	4.2.1.59	(smc04277 or smc02092)	(Smc04277 or FabZ)	Experimental but incomplete	Haag et al 2011; This study	Smc04277 appears quite important for VLCA biosynthesis but is not absolutely essential. It was suggested that this is due to some complementation by FabZ (Haag et al 2011), but has not been experimentally tested.		(Smed_1740 or Smed_1140)	(NGR_c18070 or fabZ)	(OV14_3174 or fabZ)	(RL2816 or fabZ)	(RHE_CH02477 or fabZ)	(fabZ or fabZ)	(RL73_04930 or RL73_00425)	(noHit or mll0634)	(noHit or fabZ)	(bll3810 or fabZ)
rxnVLCFA5	But-2-enoyl-ACP reductase VLCFA	cpd00067_c0 (1) + cpd00004_c0 (1) + cpd11465a_c0 (1) ==> cpd11464a_c0 (1) + cpd00003_c0 (1)	H_c0 (1) + NADH_c0 (1) + But_2_enoyl_acyl_carrier_proteinXL_c0 (1) ==> Butyryl_ACPXL_c0 (1) + NAD_c0 (1)	FALSE	R01403	1.3.1.9	smc00005	FabI1	Experimental but incomplete	This study	There are two fabI genes in S. meliloti, and in this Tn-seq data, both appeared essential suggesting they likely have separate functions. As fabI2 is located next to fabB and fabA, we predict that FabI2 functions as the general enzyme associated with this reaction, while FabI1 is involved in very long chain fatty acid biosynthesis.		Smed_0512	fabI3	fabI3	fabI2	fabI2	fabI	RL73_01670	mlr7458	DK53_446	fabI
rxnVLCFA6	3-oxohexanoyl-ACP synthase VLCFA	cpd11464a_c0 (1) + cpd00067_c0 (1) + cpd11492_c0 (1) ==> cpd11493_c0 (1) + cpd00011_c0 (1) + cpd11486a_c0 (1)	Butyryl_ACPXL_c0 (1) + H_c0 (1) + Malonyl_acyl_carrierprotein__c0 (1) ==> ACP_c0 (1) + CO2_c0 (1) + 3_Oxohexanoyl_acpXL_c0 (1)	FALSE	R02768	2.3.1.179	(smc04273 and smc04275)	(Smc04273 and FabF2)	Experimental but incomplete	Haag et al 2011; This study	Both of these proteins are expected to have the same protein function, yet both appear essential for VLCA biosynthesis. It is therefore likely that they have different substrate affinities. However, as this has not been studied, both proteins have been added to all reactions and an 'AND' statement used, even though it is likely that both are not required for each reaction		(Smed_1738 and Smed_1739)	(fabF2 and NGR_c18060)	(fabF2 and OV14_3173)	(fabF1 and fabF2)	(RHE_CH02475 and RHE_CH02476)	(fabF and fabF)	(RL73_04920 and RL73_04925)	(mlr1177 and mlr1176)	(DK53_849 and DK53_850)	(bll3808 and fabF)
rxnVLCFA7	3-oxohexanoyl-ACP dehydrogenase VLCFA	cpd00006_c0 (1) + cpd11479a_c0 (1) <==> cpd00067_c0 (1) + cpd11486a_c0 (1) + cpd00005_c0 (1)	NADP_c0 (1) + D_3_Hydroxyhexanoyl_acpXL_c0 (1) <==> H_c0 (1) + 3_Oxohexanoyl_acpXL_c0 (1) + NADPH_c0 (1)	TRUE	R02767	1.1.1.100	smc04270	AdhA2	Experimental	Haag et al 2011; This study			Smed_1737	NGR_c18040	OV14_3171	RL2813	RHE_CH02474	Atu1595	RL73_04915	mlr1178	DK53_848	noHit
rxnVLCFA8	(R)-3-hydroxy-hexanoyl-ACP dehydratase VLCFA	cpd11479a_c0 (1) <==> cpd00001_c0 (1) + cpd11473a_c0 (1)	D_3_Hydroxyhexanoyl_acpXL_c0 (1) <==> H2O_c0 (1) + 2E_Hexenoyl_acpXL_c0 (1)	TRUE	R10208	4.2.1.59	(smc04277 or smc02092)	(Smc04277 or FabZ)	Experimental but incomplete	Haag et al 2011; This study	Smc04277 appears quite important for VLCA biosynthesis but is not absolutely essential. It was suggested that this is due to some complementation by FabZ (Haag et al 2011), but has not been experimentally tested.		(Smed_1740 or Smed_1140)	(NGR_c18070 or fabZ)	(OV14_3174 or fabZ)	(RL2816 or fabZ)	(RHE_CH02477 or fabZ)	(fabZ or fabZ)	(RL73_04930 or RL73_00425)	(noHit or mll0634)	(noHit or fabZ)	(bll3810 or fabZ)
rxnVLCFA9	trans-Hex-2-enoyl-ACP reductase VLCFA	cpd00067_c0 (1) + cpd00004_c0 (1) + cpd11473a_c0 (1) ==> cpd11472a_c0 (1) + cpd00003_c0 (1)	H_c0 (1) + NADH_c0 (1) + 2E_Hexenoyl_acpXL_c0 (1) ==> Hexanoyl_ACPXL_c0 (1) + NAD_c0 (1)	FALSE	R01403	1.3.1.9	smc00005	FabI1	Experimental but incomplete	This study	There are two fabI genes in S. meliloti, and in this Tn-seq data, both appeared essential suggesting they likely have separate functions. As fabI2 is located next to fabB and fabA, we predict that FabI2 functions as the general enzyme associated with this reaction, while FabI1 is involved in very long chain fatty acid biosynthesis.		Smed_0512	fabI3	fabI3	fabI2	fabI2	fabI	RL73_01670	mlr7458	DK53_446	fabI
rxnVLCFA10	3-oxooctanoyl-ACP synthase VLCFA	cpd00067_c0 (1) + cpd11472a_c0 (1) + cpd11492_c0 (1) ==> cpd11493_c0 (1) + cpd00011_c0 (1) + cpd11490a_c0 (1)	H_c0 (1) + Hexanoyl_ACPXL_c0 (1) + Malonyl_acyl_carrierprotein__c0 (1) ==> ACP_c0 (1) + CO2_c0 (1) + 3_oxooctanoyl_acpXL_c0 (1)	FALSE	R02768	2.3.1.179	(smc04273 and smc04275)	(Smc04273 and FabF2)	Experimental but incomplete	Haag et al 2011; This study	Both of these proteins are expected to have the same protein function, yet both appear essential for VLCA biosynthesis. It is therefore likely that they have different substrate affinities. However, as this has not been studied, both proteins have been added to all reactions and an 'AND' statement used, even though it is likely that both are not required for each reaction		(Smed_1738 and Smed_1739)	(fabF2 and NGR_c18060)	(fabF2 and OV14_3173)	(fabF1 and fabF2)	(RHE_CH02475 and RHE_CH02476)	(fabF and fabF)	(RL73_04920 and RL73_04925)	(mlr1177 and mlr1176)	(DK53_849 and DK53_850)	(bll3808 and fabF)
rxnVLCFA11	3-oxooctanoyl-ACP dehydrogenase VLCFA	cpd11483a_c0 (1) + cpd00006_c0 (1) <==> cpd00067_c0 (1) + cpd11490a_c0 (1) + cpd00005_c0 (1)	R_3_Hydroxyoctanoyl_acyl_carrier_proteinXL_c0 (1) + NADP_c0 (1) <==> H_c0 (1) + 3_oxooctanoyl_acpXL_c0 (1) + NADPH_c0 (1)	TRUE	R02767	1.1.1.100	smc04270	AdhA2	Experimental	Haag et al 2011; This study			Smed_1737	NGR_c18040	OV14_3171	RL2813	RHE_CH02474	Atu1595	RL73_04915	mlr1178	DK53_848	noHit
rxnVLCFA12	(R)-3-hydroxy-octanoyl-ACP dehydratase VLCFA	cpd11483a_c0 (1) <==> cpd11471a_c0 (1) + cpd00001_c0 (1)	R_3_Hydroxyoctanoyl_acyl_carrier_proteinXL_c0 (1) <==> 2E_Octenoyl_acpXL_c0 (1) + H2O_c0 (1)	TRUE	R10208	4.2.1.59	(smc04277 or smc02092)	(Smc04277 or FabZ)	Experimental but incomplete	Haag et al 2011; This study	Smc04277 appears quite important for VLCA biosynthesis but is not absolutely essential. It was suggested that this is due to some complementation by FabZ (Haag et al 2011), but has not been experimentally tested.		(Smed_1740 or Smed_1140)	(NGR_c18070 or fabZ)	(OV14_3174 or fabZ)	(RL2816 or fabZ)	(RHE_CH02477 or fabZ)	(fabZ or fabZ)	(RL73_04930 or RL73_00425)	(noHit or mll0634)	(noHit or fabZ)	(bll3810 or fabZ)
rxnVLCFA13	trans-Oct-2-enoyl-ACP reductase VLCFA	cpd11471a_c0 (1) + cpd00067_c0 (1) + cpd00004_c0 (1) ==> cpd11470a_c0 (1) + cpd00003_c0 (1)	2E_Octenoyl_acpXL_c0 (1) + H_c0 (1) + NADH_c0 (1) ==> Octanoyl_ACPXL_c0 (1) + NAD_c0 (1)	FALSE	R01403	1.3.1.9	smc00005	FabI1	Experimental but incomplete	This study	There are two fabI genes in S. meliloti, and in this Tn-seq data, both appeared essential suggesting they likely have separate functions. As fabI2 is located next to fabB and fabA, we predict that FabI2 functions as the general enzyme associated with this reaction, while FabI1 is involved in very long chain fatty acid biosynthesis.		Smed_0512	fabI3	fabI3	fabI2	fabI2	fabI	RL73_01670	mlr7458	DK53_446	fabI
rxnVLCFA14	3-oxodecanoyl-ACP synthase VLCFA	cpd00067_c0 (1) + cpd11492_c0 (1) + cpd11470a_c0 (1) ==> cpd11493_c0 (1) + cpd00011_c0 (1) + cpd11487a_c0 (1)	H_c0 (1) + Malonyl_acyl_carrierprotein__c0 (1) + Octanoyl_ACPXL_c0 (1) ==> ACP_c0 (1) + CO2_c0 (1) + 3_oxodecanoyl_acpXL_c0 (1)	FALSE	R02768	2.3.1.179	(smc04273 and smc04275)	(Smc04273 and FabF2)	Experimental but incomplete	Haag et al 2011; This study	Both of these proteins are expected to have the same protein function, yet both appear essential for VLCA biosynthesis. It is therefore likely that they have different substrate affinities. However, as this has not been studied, both proteins have been added to all reactions and an 'AND' statement used, even though it is likely that both are not required for each reaction		(Smed_1738 and Smed_1739)	(fabF2 and NGR_c18060)	(fabF2 and OV14_3173)	(fabF1 and fabF2)	(RHE_CH02475 and RHE_CH02476)	(fabF and fabF)	(RL73_04920 and RL73_04925)	(mlr1177 and mlr1176)	(DK53_849 and DK53_850)	(bll3808 and fabF)
rxnVLCFA15	3-oxydecanoyl-ACP dehydrogenase VLCFA	cpd11482a_c0 (1) + cpd00006_c0 (1) <==> cpd00067_c0 (1) + cpd11487a_c0 (1) + cpd00005_c0 (1)	R_3_Hydroxydecanoyl_acyl_carrier_proteinXL_c0 (1) + NADP_c0 (1) <==> H_c0 (1) + 3_oxodecanoyl_acpXL_c0 (1) + NADPH_c0 (1)	TRUE	R02767	1.1.1.100	smc04270	AdhA2	Experimental	Haag et al 2011; This study			Smed_1737	NGR_c18040	OV14_3171	RL2813	RHE_CH02474	Atu1595	RL73_04915	mlr1178	DK53_848	noHit
rxnVLCFA16	(R)-3-hydroxy-decanoyl-ACP dehydratase VLCFA	cpd11482a_c0 (1) <==> cpd11475a_c0 (1) + cpd00001_c0 (1)	R_3_Hydroxydecanoyl_acyl_carrier_proteinXL_c0 (1) <==> 2E_Decenoyl_acpXL_c0 (1) + H2O_c0 (1)	TRUE	R10208	4.2.1.59	(smc04277 or smc02092)	(Smc04277 or FabZ)	Experimental but incomplete	Haag et al 2011; This study	Smc04277 appears quite important for VLCA biosynthesis but is not absolutely essential. It was suggested that this is due to some complementation by FabZ (Haag et al 2011), but has not been experimentally tested.		(Smed_1740 or Smed_1140)	(NGR_c18070 or fabZ)	(OV14_3174 or fabZ)	(RL2816 or fabZ)	(RHE_CH02477 or fabZ)	(fabZ or fabZ)	(RL73_04930 or RL73_00425)	(noHit or mll0634)	(noHit or fabZ)	(bll3810 or fabZ)
rxnVLCFA17	trans-Dec-2-enoyl-ACP reductase VLCFA	cpd11475a_c0 (1) + cpd00067_c0 (1) + cpd00004_c0 (1) ==> cpd11474a_c0 (1) + cpd00003_c0 (1)	2E_Decenoyl_acpXL_c0 (1) + H_c0 (1) + NADH_c0 (1) ==> Decanoyl_ACPXL_c0 (1) + NAD_c0 (1)	FALSE	R01403	1.3.1.9	smc00005	FabI1	Experimental but incomplete	This study	There are two fabI genes in S. meliloti, and in this Tn-seq data, both appeared essential suggesting they likely have separate functions. As fabI2 is located next to fabB and fabA, we predict that FabI2 functions as the general enzyme associated with this reaction, while FabI1 is involved in very long chain fatty acid biosynthesis.		Smed_0512	fabI3	fabI3	fabI2	fabI2	fabI	RL73_01670	mlr7458	DK53_446	fabI
rxnVLCFA18	3-oxo-dodecanoyl-ACP synthase VLCFA	cpd11474a_c0 (1) + cpd00067_c0 (1) + cpd11492_c0 (1) ==> cpd11489a_c0 (1) + cpd11493_c0 (1) + cpd00011_c0 (1)	Decanoyl_ACPXL_c0 (1) + H_c0 (1) + Malonyl_acyl_carrierprotein__c0 (1) ==> 3_oxododecanoyl_acpXL_c0 (1) + ACP_c0 (1) + CO2_c0 (1)	FALSE	R02768	2.3.1.179	(smc04273 and smc04275)	(Smc04273 and FabF2)	Experimental but incomplete	Haag et al 2011; This study	Both of these proteins are expected to have the same protein function, yet both appear essential for VLCA biosynthesis. It is therefore likely that they have different substrate affinities. However, as this has not been studied, both proteins have been added to all reactions and an 'AND' statement used, even though it is likely that both are not required for each reaction		(Smed_1738 and Smed_1739)	(fabF2 and NGR_c18060)	(fabF2 and OV14_3173)	(fabF1 and fabF2)	(RHE_CH02475 and RHE_CH02476)	(fabF and fabF)	(RL73_04920 and RL73_04925)	(mlr1177 and mlr1176)	(DK53_849 and DK53_850)	(bll3808 and fabF)
rxnVLCFA19	3-oxo-dodecanoyl-ACP dehydrogenase VLCFA	cpd00006_c0 (1) + cpd11480a_c0 (1) <==> cpd11489a_c0 (1) + cpd00067_c0 (1) + cpd00005_c0 (1)	NADP_c0 (1) + D_3_Hydroxydodecanoyl_acpXL_c0 (1) <==> 3_oxododecanoyl_acpXL_c0 (1) + H_c0 (1) + NADPH_c0 (1)	TRUE	R02767	1.1.1.100	smc04270	AdhA2	Experimental	Haag et al 2011; This study			Smed_1737	NGR_c18040	OV14_3171	RL2813	RHE_CH02474	Atu1595	RL73_04915	mlr1178	DK53_848	noHit
rxnVLCFA20	(R)-3-hydroxy-dodecanoyl-ACP dehydratase VLCFA	cpd11480a_c0 (1) <==> cpd00001_c0 (1) + cpd11469a_c0 (1)	D_3_Hydroxydodecanoyl_acpXL_c0 (1) <==> H2O_c0 (1) + 2E_Dodecenoyl_acpXL_c0 (1)	TRUE	R10208	4.2.1.59	(smc04277 or smc02092)	(Smc04277 or FabZ)	Experimental but incomplete	Haag et al 2011; This study	Smc04277 appears quite important for VLCA biosynthesis but is not absolutely essential. It was suggested that this is due to some complementation by FabZ (Haag et al 2011), but has not been experimentally tested.		(Smed_1740 or Smed_1140)	(NGR_c18070 or fabZ)	(OV14_3174 or fabZ)	(RL2816 or fabZ)	(RHE_CH02477 or fabZ)	(fabZ or fabZ)	(RL73_04930 or RL73_00425)	(noHit or mll0634)	(noHit or fabZ)	(bll3810 or fabZ)
rxnVLCFA21	trans-Dodec-2-enoyl-ACP reductase VLCFA	cpd00067_c0 (1) + cpd11469a_c0 (1) + cpd00004_c0 (1) ==> cpd11468a_c0 (1) + cpd00003_c0 (1)	H_c0 (1) + 2E_Dodecenoyl_acpXL_c0 (1) + NADH_c0 (1) ==> Dodecanoyl_ACPXL_c0 (1) + NAD_c0 (1)	FALSE	R01403	1.3.1.9	smc00005	FabI1	Experimental but incomplete	This study	There are two fabI genes in S. meliloti, and in this Tn-seq data, both appeared essential suggesting they likely have separate functions. As fabI2 is located next to fabB and fabA, we predict that FabI2 functions as the general enzyme associated with this reaction, while FabI1 is involved in very long chain fatty acid biosynthesis.		Smed_0512	fabI3	fabI3	fabI2	fabI2	fabI	RL73_01670	mlr7458	DK53_446	fabI
rxnVLCFA22	3-oxo-tetradecanoyl-ACP synthase VLCFA	cpd00067_c0 (1) + cpd11492_c0 (1) + cpd11468a_c0 (1) <==> cpd11493_c0 (1) + cpd00011_c0 (1) + cpd11491a_c0 (1)	H_c0 (1) + Malonyl_acyl_carrierprotein__c0 (1) + Dodecanoyl_ACPXL_c0 (1) <==> ACP_c0 (1) + CO2_c0 (1) + 3_oxotetradecanoyl_acpXL_c0 (1)	TRUE	R02768	2.3.1.179	(smc04273 and smc04275)	(Smc04273 and FabF2)	Experimental but incomplete	Haag et al 2011; This study	Both of these proteins are expected to have the same protein function, yet both appear essential for VLCA biosynthesis. It is therefore likely that they have different substrate affinities. However, as this has not been studied, both proteins have been added to all reactions and an 'AND' statement used, even though it is likely that both are not required for each reaction		(Smed_1738 and Smed_1739)	(fabF2 and NGR_c18060)	(fabF2 and OV14_3173)	(fabF1 and fabF2)	(RHE_CH02475 and RHE_CH02476)	(fabF and fabF)	(RL73_04920 and RL73_04925)	(mlr1177 and mlr1176)	(DK53_849 and DK53_850)	(bll3808 and fabF)
rxnVLCFA23	3-oxo-tetradecanoyl-ACP dehydrogenase VLCFA	cpd11484a_c0 (1) + cpd00006_c0 (1) <==> cpd00067_c0 (1) + cpd11491a_c0 (1) + cpd00005_c0 (1)	HMAXL_c0 (1) + NADP_c0 (1) <==> H_c0 (1) + 3_oxotetradecanoyl_acpXL_c0 (1) + NADPH_c0 (1)	TRUE	R02767	1.1.1.100	smc04270	AdhA2	Experimental	Haag et al 2011; This study			Smed_1737	NGR_c18040	OV14_3171	RL2813	RHE_CH02474	Atu1595	RL73_04915	mlr1178	DK53_848	noHit
rxnVLCFA24	(R)-3-hydroxy-tetradecanoyl-ACP dehydratase VLCFA	cpd11484a_c0 (1) <==> cpd11467a_c0 (1) + cpd00001_c0 (1)	HMAXL_c0 (1) <==> 2E_Tetradecenoyl_acpXL_c0 (1) + H2O_c0 (1)	TRUE	R10208	4.2.1.59	(smc04277 or smc02092)	(Smc04277 or FabZ)	Experimental but incomplete	Haag et al 2011; This study	Smc04277 appears quite important for VLCA biosynthesis but is not absolutely essential. It was suggested that this is due to some complementation by FabZ (Haag et al 2011), but has not been experimentally tested.		(Smed_1740 or Smed_1140)	(NGR_c18070 or fabZ)	(OV14_3174 or fabZ)	(RL2816 or fabZ)	(RHE_CH02477 or fabZ)	(fabZ or fabZ)	(RL73_04930 or RL73_00425)	(noHit or mll0634)	(noHit or fabZ)	(bll3810 or fabZ)
rxnVLCFA25	trans-Tetradec-2-enoyl-ACP reductase VLCFA	cpd00067_c0 (1) + cpd11467a_c0 (1) + cpd00004_c0 (1) ==> cpd00003_c0 (1) + cpd11466a_c0 (1)	H_c0 (1) + 2E_Tetradecenoyl_acpXL_c0 (1) + NADH_c0 (1) ==> NAD_c0 (1) + Myristoyl_ACPXL_c0 (1)	FALSE	R01403	1.3.1.9	smc00005	FabI1	Experimental but incomplete	This study	There are two fabI genes in S. meliloti, and in this Tn-seq data, both appeared essential suggesting they likely have separate functions. As fabI2 is located next to fabB and fabA, we predict that FabI2 functions as the general enzyme associated with this reaction, while FabI1 is involved in very long chain fatty acid biosynthesis.		Smed_0512	fabI3	fabI3	fabI2	fabI2	fabI	RL73_01670	mlr7458	DK53_446	fabI
rxnVLCFA26	3-oxohexadecanoyl-ACP synthase VLCFA	cpd00067_c0 (1) + cpd11492_c0 (1) + cpd11466a_c0 (1) ==> cpd11493_c0 (1) + cpd11485a_c0 (1) + cpd00011_c0 (1)	H_c0 (1) + Malonyl_acyl_carrierprotein__c0 (1) + Myristoyl_ACPXL_c0 (1) ==> ACP_c0 (1) + 3_oxohexadecanoyl_acpXL_c0 (1) + CO2_c0 (1)	FALSE	R02768	2.3.1.179	(smc04273 and smc04275)	(Smc04273 and FabF2)	Experimental but incomplete	Haag et al 2011; This study	Both of these proteins are expected to have the same protein function, yet both appear essential for VLCA biosynthesis. It is therefore likely that they have different substrate affinities. However, as this has not been studied, both proteins have been added to all reactions and an 'AND' statement used, even though it is likely that both are not required for each reaction		(Smed_1738 and Smed_1739)	(fabF2 and NGR_c18060)	(fabF2 and OV14_3173)	(fabF1 and fabF2)	(RHE_CH02475 and RHE_CH02476)	(fabF and fabF)	(RL73_04920 and RL73_04925)	(mlr1177 and mlr1176)	(DK53_849 and DK53_850)	(bll3808 and fabF)
rxnVLCFA27	3-oxohexadecanoyl-ACP dehydrogenase VLCFA	cpd11481a_c0 (1) + cpd00006_c0 (1) <==> cpd11485a_c0 (1) + cpd00067_c0 (1) + cpd00005_c0 (1)	R_3_hydroxypalmitoyl_acyl_carrierprotein_XL_c0 (1) + NADP_c0 (1) <==> 3_oxohexadecanoyl_acpXL_c0 (1) + H_c0 (1) + NADPH_c0 (1)	TRUE	R02767	1.1.1.100	smc04270	AdhA2	Experimental	Haag et al 2011; This study			Smed_1737	NGR_c18040	OV14_3171	RL2813	RHE_CH02474	Atu1595	RL73_04915	mlr1178	DK53_848	noHit
rxnVLCFA28	(R)-3-hydroxy-hexadecanoyl-ACP dehydratase VLCFA	cpd11481a_c0 (1) <==> cpd00001_c0 (1) + cpd11477a_c0 (1)	R_3_hydroxypalmitoyl_acyl_carrierprotein_XL_c0 (1) <==> H2O_c0 (1) + 2E_Hexadecenoyl_acpXL_c0 (1)	TRUE	R10208	4.2.1.59	(smc04277 or smc02092)	(Smc04277 or FabZ)	Experimental but incomplete	Haag et al 2011; This study	Smc04277 appears quite important for VLCA biosynthesis but is not absolutely essential. It was suggested that this is due to some complementation by FabZ (Haag et al 2011), but has not been experimentally tested.		(Smed_1740 or Smed_1140)	(NGR_c18070 or fabZ)	(OV14_3174 or fabZ)	(RL2816 or fabZ)	(RHE_CH02477 or fabZ)	(fabZ or fabZ)	(RL73_04930 or RL73_00425)	(noHit or mll0634)	(noHit or fabZ)	(bll3810 or fabZ)
rxnVLCFA29	trans-Hexadec-2-enoyl-ACP reductase VLCFA	cpd00067_c0 (1) + cpd00004_c0 (1) + cpd11477a_c0 (1) ==> cpd11476a_c0 (1) + cpd00003_c0 (1)	H_c0 (1) + NADH_c0 (1) + 2E_Hexadecenoyl_acpXL_c0 (1) ==> hexadecanoyl_acpXL_c0 (1) + NAD_c0 (1)	FALSE	R01403	1.3.1.9	smc00005	FabI1	Experimental but incomplete	This study	There are two fabI genes in S. meliloti, and in this Tn-seq data, both appeared essential suggesting they likely have separate functions. As fabI2 is located next to fabB and fabA, we predict that FabI2 functions as the general enzyme associated with this reaction, while FabI1 is involved in very long chain fatty acid biosynthesis.		Smed_0512	fabI3	fabI3	fabI2	fabI2	fabI	RL73_01670	mlr7458	DK53_446	fabI
rxnVLCFA30	3-oxooctadecanoyl-ACP synthase VLCFA	cpd00067_c0 (1) + cpd11476a_c0 (1) + cpd11492_c0 (1) ==> cpd11493_c0 (1) + cpd00011_c0 (1) + cpd11570a_c0 (1)	H_c0 (1) + hexadecanoyl_acpXL_c0 (1) + Malonyl_acyl_carrierprotein__c0 (1) ==> ACP_c0 (1) + CO2_c0 (1) + 3_Oxooctodecanoyl_ACPXL_c0 (1)	FALSE	R02768	2.3.1.179	(smc04273 and smc04275)	(Smc04273 and FabF2)	Experimental but incomplete	Haag et al 2011; This study	Both of these proteins are expected to have the same protein function, yet both appear essential for VLCA biosynthesis. It is therefore likely that they have different substrate affinities. However, as this has not been studied, both proteins have been added to all reactions and an 'AND' statement used, even though it is likely that both are not required for each reaction		(Smed_1738 and Smed_1739)	(fabF2 and NGR_c18060)	(fabF2 and OV14_3173)	(fabF1 and fabF2)	(RHE_CH02475 and RHE_CH02476)	(fabF and fabF)	(RL73_04920 and RL73_04925)	(mlr1177 and mlr1176)	(DK53_849 and DK53_850)	(bll3808 and fabF)
rxnVLCFA31	3-oxooctadecanoyl-ACP dehydrogenase VLCFA	cpd00067_c0 (1) + cpd11570a_c0 (1) + cpd00005_c0 (1) <==> cpd00006_c0 (1) + cpd11571a_c0 (1)	H_c0 (1) + 3_Oxooctodecanoyl_ACPXL_c0 (1) + NADPH_c0 (1) <==> NADP_c0 (1) + 3_Hydroxyoctodecanoyl_ACPXL_c0 (1)	TRUE	R02767	1.1.1.100	smc04270	AdhA2	Experimental	Haag et al 2011; This study			Smed_1737	NGR_c18040	OV14_3171	RL2813	RHE_CH02474	Atu1595	RL73_04915	mlr1178	DK53_848	noHit
rxnVLCFA32	(R)-3-hydroxy-octadecanoyl-ACP dehydratase VLCFA	cpd11571a_c0 (1) <==> cpd00001_c0 (1) + cpd11572a_c0 (1)	3_Hydroxyoctodecanoyl_ACPXL_c0 (1) <==> H2O_c0 (1) + trans_Octodec_2_enoyl_ACPXL_c0 (1)	TRUE	R10208	4.2.1.59	(smc04277 or smc02092)	(Smc04277 or FabZ)	Experimental but incomplete	Haag et al 2011; This study	Smc04277 appears quite important for VLCA biosynthesis but is not absolutely essential. It was suggested that this is due to some complementation by FabZ (Haag et al 2011), but has not been experimentally tested.		(Smed_1740 or Smed_1140)	(NGR_c18070 or fabZ)	(OV14_3174 or fabZ)	(RL2816 or fabZ)	(RHE_CH02477 or fabZ)	(fabZ or fabZ)	(RL73_04930 or RL73_00425)	(noHit or mll0634)	(noHit or fabZ)	(bll3810 or fabZ)
rxnVLCFA33	trans-Octadec-2-enoyl-ACP reductase VLCFA	cpd00067_c0 (1) + cpd00004_c0 (1) + cpd11572a_c0 (1) ==> cpd15268a_c0 (1) + cpd00003_c0 (1)	H_c0 (1) + NADH_c0 (1) + trans_Octodec_2_enoyl_ACPXL_c0 (1) ==> Octadecanoyl_ACPXL_c0 (1) + NAD_c0 (1)	FALSE	R01403	1.3.1.9	smc00005	FabI1	Experimental but incomplete	This study	There are two fabI genes in S. meliloti, and in this Tn-seq data, both appeared essential suggesting they likely have separate functions. As fabI2 is located next to fabB and fabA, we predict that FabI2 functions as the general enzyme associated with this reaction, while FabI1 is involved in very long chain fatty acid biosynthesis.		Smed_0512	fabI3	fabI3	fabI2	fabI2	fabI	RL73_01670	mlr7458	DK53_446	fabI
rxnVLCFA34	3-oxo-C20-ACP synthase VLCFA	cpd00067_c0 (1) + cpd15268a_c0 (1) + cpd11492_c0 (1) ==> cpd11493_c0 (1) + cpd00011_c0 (1) + cpdVLCFA1_c0 (1)	H_c0 (1) + Octadecanoyl_ACPXL_c0 (1) + Malonyl_acyl_carrierprotein__c0 (1) ==> ACP_c0 (1) + CO2_c0 (1) + 3_Oxo_C20_ACPXL_c0 (1)	FALSE	R02768	2.3.1.179	(smc04273 and smc04275)	(Smc04273 and FabF2)	Experimental but incomplete	Haag et al 2011; This study	Both of these proteins are expected to have the same protein function, yet both appear essential for VLCA biosynthesis. It is therefore likely that they have different substrate affinities. However, as this has not been studied, both proteins have been added to all reactions and an 'AND' statement used, even though it is likely that both are not required for each reaction		(Smed_1738 and Smed_1739)	(fabF2 and NGR_c18060)	(fabF2 and OV14_3173)	(fabF1 and fabF2)	(RHE_CH02475 and RHE_CH02476)	(fabF and fabF)	(RL73_04920 and RL73_04925)	(mlr1177 and mlr1176)	(DK53_849 and DK53_850)	(bll3808 and fabF)
rxnVLCFA35	3-oxo-C20-ACP dehydrogenase VLCFA	cpdVLCFA2_c0 (1) + cpd00006_c0 (1) <==> cpdVLCFA1_c0 (1) + cpd00067_c0 (1) + cpd00005_c0 (1)	3_Hydroxy_C20_ACPXL_c0 (1) + NADP_c0 (1) <==> 3_Oxo_C20_ACPXL_c0 (1) + H_c0 (1) + NADPH_c0 (1)	TRUE	R02767	1.1.1.100	smc04270	AdhA2	Experimental	Haag et al 2011; This study			Smed_1737	NGR_c18040	OV14_3171	RL2813	RHE_CH02474	Atu1595	RL73_04915	mlr1178	DK53_848	noHit
rxnVLCFA36	(R)-3-hydroxy-C20-ACP dehydratase VLCFA	cpdVLCFA2_c0 (1) <==> cpd00001_c0 (1) + cpdVLCFA3_c0 (1)	3_Hydroxy_C20_ACPXL_c0 (1) <==> H2O_c0 (1) + trans_C20_2_enoyl_ACPXL_c0 (1)	TRUE	R10208	4.2.1.59	(smc04277 or smc02092)	(Smc04277 or FabZ)	Experimental but incomplete	Haag et al 2011; This study	Smc04277 appears quite important for VLCA biosynthesis but is not absolutely essential. It was suggested that this is due to some complementation by FabZ (Haag et al 2011), but has not been experimentally tested.		(Smed_1740 or Smed_1140)	(NGR_c18070 or fabZ)	(OV14_3174 or fabZ)	(RL2816 or fabZ)	(RHE_CH02477 or fabZ)	(fabZ or fabZ)	(RL73_04930 or RL73_00425)	(noHit or mll0634)	(noHit or fabZ)	(bll3810 or fabZ)
rxnVLCFA37	trans-C20-2-enoyl-ACP reductase VLCFA	cpd00067_c0 (1) + cpd00004_c0 (1) + cpdVLCFA3_c0 (1) ==> cpdVLCFA4_c0 (1) + cpd00003_c0 (1)	H_c0 (1) + NADH_c0 (1) + trans_C20_2_enoyl_ACPXL_c0 (1) ==> C20_ACPXL_c0 (1) + NAD_c0 (1)	FALSE	R01403	1.3.1.9	smc00005	FabI1	Experimental but incomplete	This study	There are two fabI genes in S. meliloti, and in this Tn-seq data, both appeared essential suggesting they likely have separate functions. As fabI2 is located next to fabB and fabA, we predict that FabI2 functions as the general enzyme associated with this reaction, while FabI1 is involved in very long chain fatty acid biosynthesis.		Smed_0512	fabI3	fabI3	fabI2	fabI2	fabI	RL73_01670	mlr7458	DK53_446	fabI
rxnVLCFA38	3-oxo-C22-ACP synthase VLCFA	cpd00067_c0 (1) + cpdVLCFA4_c0 (1) + cpd11492_c0 (1) ==> cpd11493_c0 (1) + cpd00011_c0 (1) + cpdVLCFA5_c0 (1)	H_c0 (1) + C20_ACPXL_c0 (1) + Malonyl_acyl_carrierprotein__c0 (1) ==> ACP_c0 (1) + CO2_c0 (1) + 3_Oxo_C22_ACPXL_c0 (1)	FALSE	R02768	2.3.1.179	(smc04273 and smc04275)	(Smc04273 and FabF2)	Experimental but incomplete	Haag et al 2011; This study	Both of these proteins are expected to have the same protein function, yet both appear essential for VLCA biosynthesis. It is therefore likely that they have different substrate affinities. However, as this has not been studied, both proteins have been added to all reactions and an 'AND' statement used, even though it is likely that both are not required for each reaction		(Smed_1738 and Smed_1739)	(fabF2 and NGR_c18060)	(fabF2 and OV14_3173)	(fabF1 and fabF2)	(RHE_CH02475 and RHE_CH02476)	(fabF and fabF)	(RL73_04920 and RL73_04925)	(mlr1177 and mlr1176)	(DK53_849 and DK53_850)	(bll3808 and fabF)
rxnVLCFA39	3-oxo-C22-ACP dehydrogenase VLCFA	cpdVLCFA6_c0 (1) + cpd00006_c0 (1) <==> cpdVLCFA5_c0 (1) + cpd00067_c0 (1) + cpd00005_c0 (1)	3_Hydroxy_C22_ACPXL_c0 (1) + NADP_c0 (1) <==> 3_Oxo_C22_ACPXL_c0 (1) + H_c0 (1) + NADPH_c0 (1)	TRUE	R02767	1.1.1.100	smc04270	AdhA2	Experimental	Haag et al 2011; This study			Smed_1737	NGR_c18040	OV14_3171	RL2813	RHE_CH02474	Atu1595	RL73_04915	mlr1178	DK53_848	noHit
rxnVLCFA40	(R)-3-hydroxy-C22-ACP dehydratase VLCFA	cpdVLCFA6_c0 (1) <==> cpd00001_c0 (1) + cpdVLCFA7_c0 (1)	3_Hydroxy_C22_ACPXL_c0 (1) <==> H2O_c0 (1) + trans_C22_2_enoyl_ACPXL_c0 (1)	TRUE	R10208	4.2.1.59	(smc04277 or smc02092)	(Smc04277 or FabZ)	Experimental but incomplete	Haag et al 2011; This study	Smc04277 appears quite important for VLCA biosynthesis but is not absolutely essential. It was suggested that this is due to some complementation by FabZ (Haag et al 2011), but has not been experimentally tested.		(Smed_1740 or Smed_1140)	(NGR_c18070 or fabZ)	(OV14_3174 or fabZ)	(RL2816 or fabZ)	(RHE_CH02477 or fabZ)	(fabZ or fabZ)	(RL73_04930 or RL73_00425)	(noHit or mll0634)	(noHit or fabZ)	(bll3810 or fabZ)
rxnVLCFA41	trans-C22-2-enoyl-ACP reductase VLCFA	cpd00067_c0 (1) + cpd00004_c0 (1) + cpdVLCFA7_c0 (1) ==> cpdVLCFA8_c0 (1) + cpd00003_c0 (1)	H_c0 (1) + NADH_c0 (1) + trans_C22_2_enoyl_ACPXL_c0 (1) ==> C22_ACPXL_c0 (1) + NAD_c0 (1)	FALSE	R01403	1.3.1.9	smc00005	FabI1	Experimental but incomplete	This study	There are two fabI genes in S. meliloti, and in this Tn-seq data, both appeared essential suggesting they likely have separate functions. As fabI2 is located next to fabB and fabA, we predict that FabI2 functions as the general enzyme associated with this reaction, while FabI1 is involved in very long chain fatty acid biosynthesis.		Smed_0512	fabI3	fabI3	fabI2	fabI2	fabI	RL73_01670	mlr7458	DK53_446	fabI
rxnVLCFA42	3-oxo-C24-ACP synthase VLCFA	cpd00067_c0 (1) + cpdVLCFA8_c0 (1) + cpd11492_c0 (1) ==> cpd11493_c0 (1) + cpd00011_c0 (1) + cpdVLCFA9_c0 (1)	H_c0 (1) + C22_ACPXL_c0 (1) + Malonyl_acyl_carrierprotein__c0 (1) ==> ACP_c0 (1) + CO2_c0 (1) + 3_Oxo_C24_ACPXL_c0 (1)	FALSE	R02768	2.3.1.179	(smc04273 and smc04275)	(Smc04273 and FabF2)	Experimental but incomplete	Haag et al 2011; This study	Both of these proteins are expected to have the same protein function, yet both appear essential for VLCA biosynthesis. It is therefore likely that they have different substrate affinities. However, as this has not been studied, both proteins have been added to all reactions and an 'AND' statement used, even though it is likely that both are not required for each reaction		(Smed_1738 and Smed_1739)	(fabF2 and NGR_c18060)	(fabF2 and OV14_3173)	(fabF1 and fabF2)	(RHE_CH02475 and RHE_CH02476)	(fabF and fabF)	(RL73_04920 and RL73_04925)	(mlr1177 and mlr1176)	(DK53_849 and DK53_850)	(bll3808 and fabF)
rxnVLCFA43	3-oxo-C24-ACP dehydrogenase VLCFA	cpdVLCFA10_c0 (1) + cpd00006_c0 (1) <==> cpdVLCFA9_c0 (1) + cpd00067_c0 (1) + cpd00005_c0 (1)	3_Hydroxy_C24_ACPXL_c0 (1) + NADP_c0 (1) <==> 3_Oxo_C24_ACPXL_c0 (1) + H_c0 (1) + NADPH_c0 (1)	TRUE	R02767	1.1.1.100	smc04270	AdhA2	Experimental	Haag et al 2011; This study			Smed_1737	NGR_c18040	OV14_3171	RL2813	RHE_CH02474	Atu1595	RL73_04915	mlr1178	DK53_848	noHit
rxnVLCFA44	(R)-3-hydroxy-C24-ACP dehydratase VLCFA	cpdVLCFA10_c0 (1) <==> cpd00001_c0 (1) + cpdVLCFA11_c0 (1)	3_Hydroxy_C24_ACPXL_c0 (1) <==> H2O_c0 (1) + trans_C24_2_enoyl_ACPXL_c0 (1)	TRUE	R10208	4.2.1.59	(smc04277 or smc02092)	(Smc04277 or FabZ)	Experimental but incomplete	Haag et al 2011; This study	Smc04277 appears quite important for VLCA biosynthesis but is not absolutely essential. It was suggested that this is due to some complementation by FabZ (Haag et al 2011), but has not been experimentally tested.		(Smed_1740 or Smed_1140)	(NGR_c18070 or fabZ)	(OV14_3174 or fabZ)	(RL2816 or fabZ)	(RHE_CH02477 or fabZ)	(fabZ or fabZ)	(RL73_04930 or RL73_00425)	(noHit or mll0634)	(noHit or fabZ)	(bll3810 or fabZ)
rxnVLCFA45	trans-C24-2-enoyl-ACP reductase VLCFA	cpd00067_c0 (1) + cpd00004_c0 (1) + cpdVLCFA11_c0 (1) ==> cpdVLCFA12_c0 (1) + cpd00003_c0 (1)	H_c0 (1) + NADH_c0 (1) + trans_C24_2_enoyl_ACPXL_c0 (1) ==> C24_ACPXL_c0 (1) + NAD_c0 (1)	FALSE	R01403	1.3.1.9	smc00005	FabI1	Experimental but incomplete	This study	There are two fabI genes in S. meliloti, and in this Tn-seq data, both appeared essential suggesting they likely have separate functions. As fabI2 is located next to fabB and fabA, we predict that FabI2 functions as the general enzyme associated with this reaction, while FabI1 is involved in very long chain fatty acid biosynthesis.		Smed_0512	fabI3	fabI3	fabI2	fabI2	fabI	RL73_01670	mlr7458	DK53_446	fabI
rxnVLCFA46	3-oxo-C26-ACP synthase VLCFA	cpd00067_c0 (1) + cpdVLCFA12_c0 (1) + cpd11492_c0 (1) ==> cpd11493_c0 (1) + cpd00011_c0 (1) + cpdVLCFA13_c0 (1)	H_c0 (1) + C24_ACPXL_c0 (1) + Malonyl_acyl_carrierprotein__c0 (1) ==> ACP_c0 (1) + CO2_c0 (1) + 3_Oxo_C26_ACPXL_c0 (1)	FALSE	R02768	2.3.1.179	(smc04273 and smc04275)	(Smc04273 and FabF2)	Experimental but incomplete	Haag et al 2011; This study	Both of these proteins are expected to have the same protein function, yet both appear essential for VLCA biosynthesis. It is therefore likely that they have different substrate affinities. However, as this has not been studied, both proteins have been added to all reactions and an 'AND' statement used, even though it is likely that both are not required for each reaction		(Smed_1738 and Smed_1739)	(fabF2 and NGR_c18060)	(fabF2 and OV14_3173)	(fabF1 and fabF2)	(RHE_CH02475 and RHE_CH02476)	(fabF and fabF)	(RL73_04920 and RL73_04925)	(mlr1177 and mlr1176)	(DK53_849 and DK53_850)	(bll3808 and fabF)
rxnVLCFA47	3-oxo-C26-ACP dehydrogenase VLCFA	cpdVLCFA14_c0 (1) + cpd00006_c0 (1) <==> cpdVLCFA13_c0 (1) + cpd00067_c0 (1) + cpd00005_c0 (1)	3_Hydroxy_C26_ACPXL_c0 (1) + NADP_c0 (1) <==> 3_Oxo_C26_ACPXL_c0 (1) + H_c0 (1) + NADPH_c0 (1)	TRUE	R02767	1.1.1.100	smc04270	AdhA2	Experimental	Haag et al 2011; This study			Smed_1737	NGR_c18040	OV14_3171	RL2813	RHE_CH02474	Atu1595	RL73_04915	mlr1178	DK53_848	noHit
rxnVLCFA48	(R)-3-hydroxy-C26-ACP dehydratase VLCFA	cpdVLCFA14_c0 (1) <==> cpd00001_c0 (1) + cpdVLCFA15_c0 (1)	3_Hydroxy_C26_ACPXL_c0 (1) <==> H2O_c0 (1) + trans_C26_2_enoyl_ACPXL_c0 (1)	TRUE	R10208	4.2.1.59	(smc04277 or smc02092)	(Smc04277 or FabZ)	Experimental but incomplete	Haag et al 2011; This study	Smc04277 appears quite important for VLCA biosynthesis but is not absolutely essential. It was suggested that this is due to some complementation by FabZ (Haag et al 2011), but has not been experimentally tested.		(Smed_1740 or Smed_1140)	(NGR_c18070 or fabZ)	(OV14_3174 or fabZ)	(RL2816 or fabZ)	(RHE_CH02477 or fabZ)	(fabZ or fabZ)	(RL73_04930 or RL73_00425)	(noHit or mll0634)	(noHit or fabZ)	(bll3810 or fabZ)
rxnVLCFA49	trans-C26-2-enoyl-ACP reductase VLCFA	cpd00067_c0 (1) + cpd00004_c0 (1) + cpdVLCFA15_c0 (1) ==> cpdVLCFA16_c0 (1) + cpd00003_c0 (1)	H_c0 (1) + NADH_c0 (1) + trans_C26_2_enoyl_ACPXL_c0 (1) ==> C26_ACPXL_c0 (1) + NAD_c0 (1)	FALSE	R01403	1.3.1.9	smc00005	FabI1	Experimental but incomplete	This study	There are two fabI genes in S. meliloti, and in this Tn-seq data, both appeared essential suggesting they likely have separate functions. As fabI2 is located next to fabB and fabA, we predict that FabI2 functions as the general enzyme associated with this reaction, while FabI1 is involved in very long chain fatty acid biosynthesis.		Smed_0512	fabI3	fabI3	fabI2	fabI2	fabI	RL73_01670	mlr7458	DK53_446	fabI
rxnVLCFA50	3-oxo-C28-ACP synthase VLCFA	cpd00067_c0 (1) + cpdVLCFA16_c0 (1) + cpd11492_c0 (1) ==> cpd11493_c0 (1) + cpd00011_c0 (1) + cpdVLCFA17_c0 (1)	H_c0 (1) + C26_ACPXL_c0 (1) + Malonyl_acyl_carrierprotein__c0 (1) ==> ACP_c0 (1) + CO2_c0 (1) + 3_Oxo_C28_ACPXL_c0 (1)	FALSE	R02768	2.3.1.179	(smc04273 and smc04275)	(Smc04273 and FabF2)	Experimental but incomplete	Haag et al 2011; This study	Both of these proteins are expected to have the same protein function, yet both appear essential for VLCA biosynthesis. It is therefore likely that they have different substrate affinities. However, as this has not been studied, both proteins have been added to all reactions and an 'AND' statement used, even though it is likely that both are not required for each reaction		(Smed_1738 and Smed_1739)	(fabF2 and NGR_c18060)	(fabF2 and OV14_3173)	(fabF1 and fabF2)	(RHE_CH02475 and RHE_CH02476)	(fabF and fabF)	(RL73_04920 and RL73_04925)	(mlr1177 and mlr1176)	(DK53_849 and DK53_850)	(bll3808 and fabF)
rxnVLCFA51	3-oxo-C28-ACP dehydrogenase VLCFA	cpdVLCFA_c0 (1) + cpd00006_c0 (1) <==> cpdVLCFA17_c0 (1) + cpd00067_c0 (1) + cpd00005_c0 (1)	3_Hydroxy_C28_ACPXL_c0 (1) + NADP_c0 (1) <==> 3_Oxo_C28_ACPXL_c0 (1) + H_c0 (1) + NADPH_c0 (1)	TRUE	R02767	1.1.1.100	smc04270	AdhA2	Experimental	Haag et al 2011; This study			Smed_1737	NGR_c18040	OV14_3171	RL2813	RHE_CH02474	Atu1595	RL73_04915	mlr1178	DK53_848	noHit
Phosphatidylglycerol biosynthesis
rxn00612	Glycerol-3-phosphate dehydrogenase (NADP)	cpd00006_c0 (1) + cpd00080_c0 (1) <==> cpd00067_c0 (1) + cpd00095_c0 (1) + cpd00005_c0 (1)	NADP_c0 (1) + Glycerol_3_phosphate_c0 (1) <==> H_c0 (1) + Glycerone_phosphate_c0 (1) + NADPH_c0 (1)	TRUE	R05680	1.1.1.261	(smc03229 or smb20499)	(GpsA or Smb20499)	Experimental	This study	In this Tn-seq data, gpsA appeared essential only when pSymA and pSymB was absent. This is consistent both the GpsA having the annotated function, and with a pSymA or pSymB encoded bypass mechanism. A candidate is Smb20499, which is included in this reaction. However, the Smb20499 protein is annotated as using FAD (not NADP) as a co-factor. But when Smb20499 was included in this core model with a…		(Smed_2964 or Smed_3608)	(gpsA or glpD1)	(gpsA or glpD1)	(gpsA or pRL120761)	(gpsA or RHE_PB00073)	(gpsA or glpD)	(RL73_03845 or noHit)	(mlr4225 or noHit)	(DK53_1817 or noHit)	(gpsA or noHit)
rxnPG1	C16:1-SN-glycerol-3-phosphate acetyltransferase reaction 1	cpd00009_c0 (1) + cpdUS12_c0 (1) <==> cpdPG1_c0 (1) + cpd11493_c0 (1)	Phosphate_c0 (1) + palmitoleoyl-ACP_c0 (1) <==> palmitoleoyl-phosphate_c0 (1) + ACP_c0 (1)	TRUE	R00851	2.3.1.15	smc01784	PlsX	Experimental	This study			Smed_0828	plsX	plsX	plsX	plsX	plsX	noHit	mlr8423	plsX	plsX
rxnPG2	C16:1-SN-glycerol-3-phosphate acetyltransferase reaction 2	cpd00080_c0 (1) + cpdPG1_c0 (1) ==> cpd00009_c0 (1) + cpdPG2_c0 (1)	Glycerol_3_phosphate_c0 (1) + palmitoleoyl-phosphate_c0 (1) ==> Phosphate_c0 (1) + 1-palmitoleoyl-sn-glycerol-3-phosphate_c0 (1)	FALSE	R00851	2.3.1.15	smc01362	PlsY	Experimental	This study	The smc01362 gene is annotated as encoding a hypothetical transmembrane protein. However, its product shows similarity to PlsY proteins and it appeared essential in this Tn-seq data. Therefore, we have annotated this gene as plsY.		Smed_0934	NGR_c10880	OV14_2355	RL1737	RHE_CH01640	Atu1306	RL73_04820	mlr0688	plsY	blr5101
rxnPG3	C16:0-SN-glycerol-3-phosphate acetyltransferase (C16:1)	cpd11476_c0 (1) + cpdPG2_c0 (1) ==> cpd11493_c0 (1) + cpdPG3_c0 (1)	hexadecanoyl_acp_c0 (1) + 1-palmitoleoyl-sn-glycerol-3-phosphate_c0 (1) ==> ACP_c0 (1) + 1-palmitoleoyl-2-palmitic-sn-glycerol-3-phosphate_c0 (1)	FALSE	R02241	2.3.1.51	smc00714	PlsC	Experimental	Basconcillo et al 2009b; This study	Mutations of plsC result in a slow growth phenotype with some cell lysis in liquid cultures (Basconcillo et al 2009). However, in this Tn-seq data, mutations of plsC appeared less severe in the strain lacking pSymA and pSymB, likely because these strains already show a slow growth phenotype.		Smed_2546	plsC	plsC	RL4333	plsC	plsC	RL73_05690	mlr3529	DK53_1915	plsC
rxnPG4	Phosphatidate cytidylyltransferase (C32:1)	cpdPG3_c0 (1) + cpd00052_c0 (1) <==> cpdPG4_c0 (1) + cpd00012_c0 (1)	1-palmitoleoyl-2-palmitic-sn-glycerol-3-phosphate_c0 (1) + CTP_c0 (1) <==> CDP-1-palmitoleoyl-2-palmitic-sn-glycerol-3-phosphate_c0 (1) + PPi_c0 (1)	TRUE	R01799	2.7.7.41	smc02096	CdsA	Experimental	This study			Smed_1136	NGR_c13390	OV14_2581	cdsA	cdsAch	cdsA	RL73_00405	mll0639	DK53_1144	noHit
rxnPG5	Phosphatidylglycerol synthase (C32:1)	cpdPG4_c0 (1) + cpd00080_c0 (1) <==> cpdPG5_c0 (1) + cpd00046_c0 (1)	CDP-1-palmitoleoyl-2-palmitic-sn-glycerol-3-phosphate_c0 (1) + Glycerol_3_phosphate_c0 (1) <==> Phosphatidylglycerophosphate-1-palmitoleoyl-2-palmitic_c0 (1) + CMP_c0 (1)	TRUE	R01801	2.7.8.5	smc00601	PgsA	Experimental	This study			Smed_0781	pgsA	pgsA	pgsA	pgsAch	pgsA	RL73_05840	mlr7913	pgsA	pgsA
rxnPG6	Phosphatidylglycerol phosphatase (C32:1)	cpdPG5_c0 (1) + cpd00001_c0 (1) ==> cpd00067_c0 (1) + cpdPG6_c0 (1) + cpd00009_c0 (1)	Phosphatidylglycerophosphate-1-palmitoleoyl-2-palmitic_c0 (1) + H2O_c0 (1) ==> H_c0 (1) + Phosphatidylglycerol-1-palmitoleoyl-2-palmitic_c0 (1) + Phosphate_c0 (1)	FALSE	R02029	3.1.3.27	(smc04406 or UnknownC)	(Smc04406 or UnknownC)	Predicted		The enzyme catalyzing this reaction has not been identified in S. meliloti. Smc04406 shows some similarity to these enzymes and is therefore a candidate, but this has not been tested. Additionally, its deletion does not appear lethal (Tn-seq), suggesting another enzyme has this activity as well (or in place of).		(Smed_3179 or UnknownC)	(NGR_c33190 or UnknownC)	(OV14_0840 or UnknownC)	(RL4708 or UnknownC)	(RHE_CH04094 or UnknownC)	(Atu2611 or UnknownC)	(noHit or UnknownC)	(mlr0012 or UnknownC)	(DK53_745 or UnknownC)	(noHit or UnknownC)
rxnPG7	C16:0-SN-glycerol-3-phosphate acetyltransferase reaction 1	cpd00009_c0 (1) + cpd11476_c0 (1) <==> cpdPG7_c0 (1) + cpd11493_c0 (1)	Phosphate_c0 (1) + hexadecanoyl_acp_c0 (1) <==> palmitic-phosphate_c0 (1) + ACP_c0 (1)	TRUE	R00851	2.3.1.15	smc01784	PlsX	Experimental	This study			Smed_0828	plsX	plsX	plsX	plsX	plsX	noHit	mlr8423	plsX	plsX
rxnPG8	C16:0-SN-glycerol-3-phosphate acetyltransferase reaction 2	cpd00080_c0 (1) + cpdPG7_c0 (1) ==> cpd00009_c0 (1) + cpdPG8_c0 (1)	Glycerol_3_phosphate_c0 (1) + palmitic-phosphate_c0 (1) ==> Phosphate_c0 (1) + 1-palmitic-sn-glycerol-3-phosphate_c0 (1)	FALSE	R00851	2.3.1.15	smc01362	PlsY	Experimental	This study	The smc01362 gene is annotated as encoding a hypothetical transmembrane protein. However, its product shows similarity to PlsY proteins and it appeared essential in this Tn-seq data. Therefore, we have annotated this gene as plsY.		Smed_0934	NGR_c10880	OV14_2355	RL1737	RHE_CH01640	Atu1306	RL73_04820	mlr0688	plsY	blr5101
rxnPG9	C16:0-SN-glycerol-3-phosphate acetyltransferase (C16:0)	cpd11476_c0 (1) + cpdPG8_c0 (1) ==> cpd11493_c0 (1) + cpdPG9_c0 (1)	hexadecanoyl_acp_c0 (1) + 1-palmitic-sn-glycerol-3-phosphate_c0 (1) ==> ACP_c0 (1) + 1_2-palmitic-sn-glycerol-3-phosphate_c0 (1)	FALSE	R02241	2.3.1.51	smc00714	PlsC	Experimental	Basconcillo et al 2009b; This study	Mutations of plsC result in a slow growth phenotype with some cell lysis in liquid cultures (Basconcillo et al 2009). However, in this Tn-seq data, mutations of plsC appeared less severe in the strain lacking pSymA and pSymB, likely because these strains already show a slow growth phenotype.		Smed_2546	plsC	plsC	RL4333	plsC	plsC	RL73_05690	mlr3529	DK53_1915	plsC
rxnPG10	Phosphatidate cytidylyltransferase (C32:0)	cpdPG9_c0 (1) + cpd00052_c0 (1) <==> cpdPG10_c0 (1) + cpd00012_c0 (1)	1_2-palmitic-sn-glycerol-3-phosphate_c0 (1) + CTP_c0 (1) <==> CDP-1_2-palmitic-sn-glycerol-3-phosphate_c0 (1) + PPi_c0 (1)	TRUE	R01799	2.7.7.41	smc02096	CdsA	Experimental	This study			Smed_1136	NGR_c13390	OV14_2581	cdsA	cdsAch	cdsA	RL73_00405	mll0639	DK53_1144	noHit
rxnPG11	Phosphatidylglycerol synthase (C32:0)	cpdPG10_c0 (1) + cpd00080_c0 (1) <==> cpdPG11_c0 (1) + cpd00046_c0 (1)	CDP-1_2-palmitic-sn-glycerol-3-phosphate_c0 (1) + Glycerol_3_phosphate_c0 (1) <==> Phosphatidylglycerophosphate-1_2-palmitic_c0 (1) + CMP_c0 (1)	TRUE	R01801	2.7.8.5	smc00601	PgsA	Experimental	This study			Smed_0781	pgsA	pgsA	pgsA	pgsAch	pgsA	RL73_05840	mlr7913	pgsA	pgsA
rxnPG12	Phosphatidylglycerol phosphatase (C32:0)	cpdPG11_c0 (1) + cpd00001_c0 (1) ==> cpd00067_c0 (1) + cpdPG12_c0 (1) + cpd00009_c0 (1)	Phosphatidylglycerophosphate-1_2-palmitic_c0 (1) + H2O_c0 (1) ==> H_c0 (1) + Phosphatidylglycerol-1_2-palmitic-2-palmitic_c0 (1) + Phosphate_c0 (1)	FALSE	R02029	3.1.3.27	(smc04406 or UnknownC)	(Smc04406 or UnknownC)	Predicted		The enzyme catalyzing this reaction has not been identified in S. meliloti. Smc04406 shows some similarity to these enzymes and is therefore a candidate, but this has not been tested. Additionally, its deletion does not appear lethal (Tn-seq), suggesting another enzyme has this activity as well (or in place of).		(Smed_3179 or UnknownC)	(NGR_c33190 or UnknownC)	(OV14_0840 or UnknownC)	(RL4708 or UnknownC)	(RHE_CH04094 or UnknownC)	(Atu2611 or UnknownC)	(noHit or UnknownC)	(mlr0012 or UnknownC)	(DK53_745 or UnknownC)	(noHit or UnknownC)
rxnPG13	C18:1-SN-glycerol-3-phosphate acetyltransferase reaction 1	cpd00009_c0 (1) + cpdUS16_c0 (1) <==> cpdPG13_c0 (1) + cpd11493_c0 (1)	Phosphate_c0 (1) + cis-vaccenoyl-ACP_c0 (1) <==> cis-vaccenoyl-phosphate_c0 (1) + ACP_c0 (1)	TRUE	R00851	2.3.1.15	smc01784	PlsX	Experimental	This study			Smed_0828	plsX	plsX	plsX	plsX	plsX	noHit	mlr8423	plsX	plsX
rxnPG14	C18:1-SN-glycerol-3-phosphate acetyltransferase reaction 2	cpd00080_c0 (1) + cpdPG13_c0 (1) ==> cpd00009_c0 (1) + cpdPG14_c0 (1)	Glycerol_3_phosphate_c0 (1) + cis-vaccenoyl-phosphate_c0 (1) ==> Phosphate_c0 (1) + 1-cis-vaccenoyl-sn-glycerol-3-phosphate_c0 (1)	FALSE	R00851	2.3.1.15	smc01362	PlsY	Experimental	This study	The smc01362 gene is annotated as encoding a hypothetical transmembrane protein. However, its product shows similarity to PlsY proteins and it appeared essential in this Tn-seq data. Therefore, we have annotated this gene as plsY.		Smed_0934	NGR_c10880	OV14_2355	RL1737	RHE_CH01640	Atu1306	RL73_04820	mlr0688	plsY	blr5101
rxnPG15	C16:1-SN-glycerol-3-phosphate acetyltransferase (C18:1)	cpdUS12_c0 (1) + cpdPG14_c0 (1) ==> cpd11493_c0 (1) + cpdPG15_c0 (1)	palmitoleoyl-ACP_c0 (1) + 1-cis-vaccenoyl-sn-glycerol-3-phosphate_c0 (1) ==> ACP_c0 (1) + 1-cis-vaccenoyl-2-palmitoleoyl-sn-glycerol-3-phosphate_c0 (1)	FALSE	R02241	2.3.1.51	smc02096	PlsC	Experimental	Basconcillo et al 2009b; This study	Mutations of plsC result in a slow growth phenotype with some cell lysis in liquid cultures (Basconcillo et al 2009). However, in this Tn-seq data, mutations of plsC appeared less severe in the strain lacking pSymA and pSymB, likely because these strains already show a slow growth phenotype.		Smed_1136	NGR_c13390	OV14_2581	cdsA	cdsAch	cdsA	RL73_00405	mll0639	DK53_1144	noHit
rxnPG16	Phosphatidate cytidylyltransferase (C34:2)	cpdPG15_c0 (1) + cpd00052_c0 (1) <==> cpdPG16_c0 (1) + cpd00012_c0 (1)	1-cis-vaccenoyl-2-palmitoleoyl-sn-glycerol-3-phosphate_c0 (1) + CTP_c0 (1) <==> CDP-1-cis-vaccenoyl-2-palmitoleoyl-sn-glycerol-3-phosphate_c0 (1) + PPi_c0 (1)	TRUE	R01799	2.7.7.41	smc02096	CdsA	Experimental	This study			Smed_1136	NGR_c13390	OV14_2581	cdsA	cdsAch	cdsA	RL73_00405	mll0639	DK53_1144	noHit
rxnPG17	Phosphatidylglycerol synthase (C34:2)	cpdPG16_c0 (1) + cpd00080_c0 (1) <==> cpdPG17_c0 (1) + cpd00046_c0 (1)	CDP-1-cis-vaccenoyl-2-palmitoleoyl-sn-glycerol-3-phosphate_c0 (1) + Glycerol_3_phosphate_c0 (1) <==> Phosphatidylglycerophosphate-1-cis-vaccenoyl-2-palmitoleoyl_c0 (1) + CMP_c0 (1)	TRUE	R01801	2.7.8.5	smc00601	PgsA	Experimental	This study			Smed_0781	pgsA	pgsA	pgsA	pgsAch	pgsA	RL73_05840	mlr7913	pgsA	pgsA
rxnPG18	Phosphatidylglycerol phosphatase (C34:2)	cpdPG17_c0 (1) + cpd00001_c0 (1) ==> cpd00067_c0 (1) + cpdPG18_c0 (1) + cpd00009_c0 (1)	Phosphatidylglycerophosphate-1-cis-vaccenoyl-2-palmitoleoyl_c0 (1) + H2O_c0 (1) ==> H_c0 (1) + Phosphatidylglycerol-1-cis-vaccenoyl-2-palmitoleoyl_c0 (1) + Phosphate_c0 (1)	FALSE	R02029	3.1.3.27	(smc04406 or UnknownC)	(Smc04406 or UnknownC)	Predicted		The enzyme catalyzing this reaction has not been identified in S. meliloti. Smc04406 shows some similarity to these enzymes and is therefore a candidate, but this has not been tested. Additionally, its deletion does not appear lethal (Tn-seq), suggesting another enzyme has this activity as well (or in place of).		(Smed_3179 or UnknownC)	(NGR_c33190 or UnknownC)	(OV14_0840 or UnknownC)	(RL4708 or UnknownC)	(RHE_CH04094 or UnknownC)	(Atu2611 or UnknownC)	(noHit or UnknownC)	(mlr0012 or UnknownC)	(DK53_745 or UnknownC)	(noHit or UnknownC)
rxnPG19	C16:0-SN-glycerol-3-phosphate acetyltransferase (C18:1)	cpd11476_c0 (1) + cpdPG14_c0 (1) ==> cpd11493_c0 (1) + cpdPG19_c0 (1)	hexadecanoyl_acp_c0 (1) + 1-cis-vaccenoyl-sn-glycerol-3-phosphate_c0 (1) ==> ACP_c0 (1) + 1-cis-vaccenoyl-2-palmitic-sn-glycerol-3-phosphate_c0 (1)	FALSE	R02241	2.3.1.51	smc02096	PlsC	Experimental	Basconcillo et al 2009b; This study	Mutations of plsC result in a slow growth phenotype with some cell lysis in liquid cultures (Basconcillo et al 2009). However, in this Tn-seq data, mutations of plsC appeared less severe in the strain lacking pSymA and pSymB, likely because these strains already show a slow growth phenotype.		Smed_1136	NGR_c13390	OV14_2581	cdsA	cdsAch	cdsA	RL73_00405	mll0639	DK53_1144	noHit
rxnPG20	Phosphatidate cytidylyltransferase (C34:1)	cpdPG19_c0 (1) + cpd00052_c0 (1) <==> cpdPG20_c0 (1) + cpd00012_c0 (1)	1-cis-vaccenoyl-2-palmitic-sn-glycerol-3-phosphate_c0 (1) + CTP_c0 (1) <==> CDP-1-cis-vaccenoyl-2-palmitic-sn-glycerol-3-phosphate_c0 (1) + PPi_c0 (1)	TRUE	R01799	2.7.7.41	smc02096	CdsA	Experimental	This study			Smed_1136	NGR_c13390	OV14_2581	cdsA	cdsAch	cdsA	RL73_00405	mll0639	DK53_1144	noHit
rxnPG21	Phosphatidylglycerol synthase (C34:1)	cpdPG20_c0 (1) + cpd00080_c0 (1) <==> cpdPG21_c0 (1) + cpd00046_c0 (1)	CDP-1-cis-vaccenoyl-2-palmitic-sn-glycerol-3-phosphate_c0 (1) + Glycerol_3_phosphate_c0 (1) <==> Phosphatidylglycerophosphate-1-cis-vaccenoyl-2-palmitic_c0 (1) + CMP_c0 (1)	TRUE	R01801	2.7.8.5	smc00601	PgsA	Experimental	This study			Smed_0781	pgsA	pgsA	pgsA	pgsAch	pgsA	RL73_05840	mlr7913	pgsA	pgsA
rxnPG22	Phosphatidylglycerol phosphatase (C34:1)	cpdPG21_c0 (1) + cpd00001_c0 (1) ==> cpd00067_c0 (1) + cpdPG22_c0 (1) + cpd00009_c0 (1)	Phosphatidylglycerophosphate-1-cis-vaccenoyl-2-palmitic_c0 (1) + H2O_c0 (1) ==> H_c0 (1) + Phosphatidylglycerol-1-cis-vaccenoyl-2-palmitic_c0 (1) + Phosphate_c0 (1)	FALSE	R02029	3.1.3.27	(smc04406 or UnknownC)	(Smc04406 or UnknownC)	Predicted		The enzyme catalyzing this reaction has not been identified in S. meliloti. Smc04406 shows some similarity to these enzymes and is therefore a candidate, but this has not been tested. Additionally, its deletion does not appear lethal (Tn-seq), suggesting another enzyme has this activity as well (or in place of).		(Smed_3179 or UnknownC)	(NGR_c33190 or UnknownC)	(OV14_0840 or UnknownC)	(RL4708 or UnknownC)	(RHE_CH04094 or UnknownC)	(Atu2611 or UnknownC)	(noHit or UnknownC)	(mlr0012 or UnknownC)	(DK53_745 or UnknownC)	(noHit or UnknownC)
rxnPG23	C18:1-SN-glycerol-3-phosphate acetyltransferase (C16:0)	cpdUS16_c0 (1) + cpdPG8_c0 (1) ==> cpd11493_c0 (1) + cpdPG23_c0 (1)	cis-vaccenoyl-ACP_c0 (1) + 1-palmitic-sn-glycerol-3-phosphate_c0 (1) ==> ACP_c0 (1) + 1-palmitic-2-cis-vaccenoyl-sn-glycerol-3-phosphate_c0 (1)	FALSE	R02241	2.3.1.51	(smc02490 or smc02158)	(Smc02490 or Smc02158)	Predicted		Previous work (Basconcillo et al 2009) indicated that a plsC mutant did not impair the addition of C18 fatty acids, suggesting another enzyme(s) must fulfill this reaction. The indicated enzymes are possible candidates, and PlsC could also potentially play a role as well.		(Smed_2932 or Smed_0113)	(NGR_c31180 or NGR_c01220)	(OV14_0610 or OV14_2513)	(RL4425 or pRL90201)	(RHE_CH03878 or RHE_PB00100)	(noHit or noHit)	(noHit or noHit)	(noHit or noHit)	(noHit or noHit)	(noHit or noHit)
rxnPG24	Phosphatidate cytidylyltransferase (C34:1 2)	cpdPG23_c0 (1) + cpd00052_c0 (1) <==> cpdPG24_c0 (1) + cpd00012_c0 (1)	1-palmitic-2-cis-vaccenoyl-sn-glycerol-3-phosphate_c0 (1) + CTP_c0 (1) <==> CDP-1-palmitic-2-cis-vaccenoyl-sn-glycerol-3-phosphate_c0 (1) + PPi_c0 (1)	TRUE	R01799	2.7.7.41	smc02096	CdsA	Experimental	This study			Smed_1136	NGR_c13390	OV14_2581	cdsA	cdsAch	cdsA	RL73_00405	mll0639	DK53_1144	noHit
rxnPG25	Phosphatidylglycerol synthase (C34:1 2)	cpdPG24_c0 (1) + cpd00080_c0 (1) <==> cpdPG25_c0 (1) + cpd00046_c0 (1)	CDP-1-palmitic-2-cis-vaccenoyl-sn-glycerol-3-phosphate_c0 (1) + Glycerol_3_phosphate_c0 (1) <==> Phosphatidylglycerophosphate-1-palmitic-2-cis-vaccenoyl_c0 (1) + CMP_c0 (1)	TRUE	R01801	2.7.8.5	smc00601	PgsA	Experimental	This study			Smed_0781	pgsA	pgsA	pgsA	pgsAch	pgsA	RL73_05840	mlr7913	pgsA	pgsA
rxnPG26	Phosphatidylglycerol phosphatase (C34:1 2)	cpdPG25_c0 (1) + cpd00001_c0 (1) ==> cpd00067_c0 (1) + cpdPG26_c0 (1) + cpd00009_c0 (1)	Phosphatidylglycerophosphate-1-palmitic-2-cis-vaccenoyl_c0 (1) + H2O_c0 (1) ==> H_c0 (1) + Phosphatidylglycerol-1-palmitic-2-cis-vaccenoyl_c0 (1) + Phosphate_c0 (1)	FALSE	R02029	3.1.3.27	(smc04406 or UnknownC)	(Smc04406 or UnknownC)	Predicted		The enzyme catalyzing this reaction has not been identified in S. meliloti. Smc04406 shows some similarity to these enzymes and is therefore a candidate, but this has not been tested. Additionally, its deletion does not appear lethal (Tn-seq), suggesting another enzyme has this activity as well (or in place of).		(Smed_3179 or UnknownC)	(NGR_c33190 or UnknownC)	(OV14_0840 or UnknownC)	(RL4708 or UnknownC)	(RHE_CH04094 or UnknownC)	(Atu2611 or UnknownC)	(noHit or UnknownC)	(mlr0012 or UnknownC)	(DK53_745 or UnknownC)	(noHit or UnknownC)
rxnPG27	PG(C34:2) cyclopropanation	cpdPG18_c0 (1) + cpd00017_c0 (1) ==> cpd00067_c0 (1) + cpdPG27_c0 (1) + cpd00019_c0 (1)	Phosphatidylglycerol-1-cis-vaccenoyl-2-palmitoleoyl_c0 (1) + S_Adenosyl_L_methionine_c0 (1) ==> H_c0 (1) + Phosphatidylglycerol-1-cis-vaccenoyl-2-palmitoleoyl(cyclopropanated)_c0 (1) + S_Adenosyl_homocysteine_c0 (1)	FALSE	R03411	2.1.1.79	smc02654	Cfa2	Experimental	Basconcillo et al 2009a			Smed_0680	NGR_c08270	OV14_2091	acpS	acpS	acpS	RL73_03545	mlr7761	acpS	acpS
rxnPG28	PG(C34:2 2) cyclopropanation	cpdPG18_c0 (1) + cpd00017_c0 (1) ==> cpd00067_c0 (1) + cpdPG28_c0 (1) + cpd00019_c0 (1)	Phosphatidylglycerol-1-cis-vaccenoyl-2-palmitoleoyl_c0 (1) + S_Adenosyl_L_methionine_c0 (1) ==> H_c0 (1) + Phosphatidylglycerol-1-cis-vaccenoyl(cyclopropanated)-2-palmitoleoyl_c0 (1) + S_Adenosyl_homocysteine_c0 (1)	FALSE	R03411	2.1.1.79	smc02654	Cfa2	Experimental	Basconcillo et al 2009a			Smed_0680	NGR_c08270	OV14_2091	acpS	acpS	acpS	RL73_03545	mlr7761	acpS	acpS
rxnPG34	PG(C34:1) cyclopropanation	cpdPG22_c0 (1) + cpd00017_c0 (1) ==> cpd00067_c0 (1) + cpdPG34_c0 (1) + cpd00019_c0 (1)	Phosphatidylglycerol-1-cis-vaccenoyl-2-palmitic_c0 (1) + S_Adenosyl_L_methionine_c0 (1) ==> H_c0 (1) + Phosphatidylglycerol-1-cis-vaccenoyl(cyclopropanated)-2-palmitic_c0 (1) + S_Adenosyl_homocysteine_c0 (1)	FALSE	R03411	2.1.1.79	smc02654	Cfa2	Experimental	Basconcillo et al 2009a			Smed_0680	NGR_c08270	OV14_2091	acpS	acpS	acpS	RL73_03545	mlr7761	acpS	acpS
rxnPG35	C18:1-SN-glycerol-3-phosphate acetyltransferase (C18:1)	cpdUS16_c0 (1) + cpdPG14_c0 (1) ==> cpd11493_c0 (1) + cpdPG35_c0 (1)	cis-vaccenoyl-ACP_c0 (1) + 1-cis-vaccenoyl-sn-glycerol-3-phosphate_c0 (1) ==> ACP_c0 (1) + 1-cis-vaccenoyl-2-cis-vaccenoyl-sn-glycerol-3-phosphate_c0 (1)	FALSE	R02241	2.3.1.51	(smc02490 or smc02158)	(Smc02490 or Smc02158)	Predicted		Previous work (Basconcillo et al 2009) indicated that a plsC mutant did not impair the addition of C18 fatty acids, suggesting another enzyme(s) must fulfill this reaction. The indicated enzymes are possible candidates, and PlsC could also potentially play a role as well.		(Smed_2932 or Smed_0113)	(NGR_c31180 or NGR_c01220)	(OV14_0610 or OV14_2513)	(RL4425 or pRL90201)	(RHE_CH03878 or RHE_PB00100)	(noHit or noHit)	(noHit or noHit)	(noHit or noHit)	(noHit or noHit)	(noHit or noHit)
rxnPG36	Phosphatidate cytidylyltransferase (C36:2)	cpdPG35_c0 (1) + cpd00052_c0 (1) <==> cpdPG36_c0 (1) + cpd00012_c0 (1)	1-cis-vaccenoyl-2-cis-vaccenoyl-sn-glycerol-3-phosphate_c0 (1) + CTP_c0 (1) <==> CDP-1-cis-vaccenoyl-2-cis-vaccenoyl-sn-glycerol-3-phosphate_c0 (1) + PPi_c0 (1)	TRUE	R01799	2.7.7.41	smc02096	CdsA	Experimental	This study			Smed_1136	NGR_c13390	OV14_2581	cdsA	cdsAch	cdsA	RL73_00405	mll0639	DK53_1144	noHit
rxnPG37	Phosphatidylglycerol synthase (C36:2)	cpdPG36_c0 (1) + cpd00080_c0 (1) <==> cpdPG37_c0 (1) + cpd00046_c0 (1)	CDP-1-cis-vaccenoyl-2-cis-vaccenoyl-sn-glycerol-3-phosphate_c0 (1) + Glycerol_3_phosphate_c0 (1) <==> Phosphatidylglycerophosphate-1-cis-vaccenoyl-2-cis-vaccenoyl_c0 (1) + CMP_c0 (1)	TRUE	R01801	2.7.8.5	smc00601	PgsA	Experimental	This study			Smed_0781	pgsA	pgsA	pgsA	pgsAch	pgsA	RL73_05840	mlr7913	pgsA	pgsA
rxnPG38	Phosphatidylglycerol phosphatase (C36:2)	cpdPG37_c0 (1) + cpd00001_c0 (1) ==> cpd00067_c0 (1) + cpdPG38_c0 (1) + cpd00009_c0 (1)	Phosphatidylglycerophosphate-1-cis-vaccenoyl-2-cis-vaccenoyl_c0 (1) + H2O_c0 (1) ==> H_c0 (1) + Phosphatidylglycerol-1-cis-vaccenoyl-2-cis-vaccenoyl_c0 (1) + Phosphate_c0 (1)	FALSE	R02029	3.1.3.27	(smc04406 or UnknownC)	(Smc04406 or UnknownC)	Predicted		The enzyme catalyzing this reaction has not been identified in S. meliloti. Smc04406 shows some similarity to these enzymes and is therefore a candidate, but this has not been tested. Additionally, its deletion does not appear lethal (Tn-seq), suggesting another enzyme has this activity as well (or in place of).		(Smed_3179 or UnknownC)	(NGR_c33190 or UnknownC)	(OV14_0840 or UnknownC)	(RL4708 or UnknownC)	(RHE_CH04094 or UnknownC)	(Atu2611 or UnknownC)	(noHit or UnknownC)	(mlr0012 or UnknownC)	(DK53_745 or UnknownC)	(noHit or UnknownC)
rxnPG39	PG(C36:2) cyclopropanation	cpdPG38_c0 (1) + cpd00017_c0 (1) ==> cpd00067_c0 (1) + cpdPG39_c0 (1) + cpd00019_c0 (1)	Phosphatidylglycerol-1-cis-vaccenoyl-2-cis-vaccenoyl_c0 (1) + S_Adenosyl_L_methionine_c0 (1) ==> H_c0 (1) + Phosphatidylglycerol-1-cis-vaccenoyl(cyclopropanated)-2-cis-vaccenoyl_c0 (1) + S_Adenosyl_homocysteine_c0 (1)	FALSE	R03411	2.1.1.79	smc02654	Cfa2	Experimental	Basconcillo et al 2009a			Smed_0680	NGR_c08270	OV14_2091	acpS	acpS	acpS	RL73_03545	mlr7761	acpS	acpS
rxnPG40	PG(C37:2) cyclopropanation	cpdPG39_c0 (1) + cpd00017_c0 (1) ==> cpd00067_c0 (1) + cpdPG40_c0 (1) + cpd00019_c0 (1)	Phosphatidylglycerol-1-cis-vaccenoyl(cyclopropanated)-2-cis-vaccenoyl_c0 (1) + S_Adenosyl_L_methionine_c0 (1) ==> H_c0 (1) + Phosphatidylglycerol-1-cis-vaccenoyl(cyclopropanated)-2-cis-vaccenoyl(cyclopropanated)_c0 (1) + S_Adenosyl_homocysteine_c0 (1)	FALSE	R03411	2.1.1.79	smc02654	Cfa2	Experimental	Basconcillo et al 2009a			Smed_0680	NGR_c08270	OV14_2091	acpS	acpS	acpS	RL73_03545	mlr7761	acpS	acpS
rxnPG	Overall PG reaction	cpdPG6_c0 (0.4) + cpdPG12_c0 (1.4) + cpdPG18_c0 (1.8) + cpdPG22_c0 (24.9) + cpdPG26_c0 (1.7) + cpdPG27_c0 (1.1) + cpdPG28_c0 (1.1) + cpdPG34_c0 (2.6) + cpdPG38_c0 (57.3) + cpdPG39_c0 (7.3) + cpdPG40_c0 (0.3) ==> cpdPG_c0 (1)	Phosphatidylglycerol-1-palmitoleoyl-2-palmitic_c0 (0.4) + Phosphatidylglycerol-1_2-palmitic-2-palmitic_c0 (1.4) + Phosphatidylglycerol-1-cis-vaccenoyl-2-palmitoleoyl_c0 (1.8) + Phosphatidylglycerol-1-cis-vaccenoyl-2-palmitic_c0 (24.9) + Phosphatidylglycerol-1-palmitic-2-cis-vaccenoyl_c0 (1.7) + Phosphatidylglycerol-1-cis-vaccenoyl-2-palmitoleoyl(cyclopropanated)_c0 (1.1) + Phosphatidylglycerol-1-…	FALSE					Experimental		A reaction to combine the different PGs in the correct ratio (Basconcillo et al 2009b).
Cardiolipin biosynthesis
rxnCL1	Cardiolipin synthase (C64:2)	cpdPG6_c0 (2) <==> cpd00100_c0 (1) + cpdCL1_c0 (1)	Phosphatidylglycerol-1-palmitoleoyl-2-palmitic_c0 (2) <==> Glycerol_c0 (1) + Cardiolipin-1_2-(1-palmitoleoyl-2-palmitic)_c0 (1)	TRUE	R02030	2.7.8.41	(smc02076 or NonEssential)	(Cls or NonEssential)	Predicted		Cls appears to be the only cardiolipin synthase in the S. meliloti genome based on sequence similarity. However, its activity in S. meliloti has not been confirmed, although the Cls in Rhizobium etli has been (Sandoval-Calderón et al 2009), and it has not been confirmed to be the only enzyme capable of performing this reaction (only Cls has this activity in R. etli). smc02076 appeared non-essenti…		(Smed_1155 or NonEssential)	(NGR_c13620 or NonEssential)	(OV14_2604 or NonEssential)	(cls or NonEssential)	(cls or NonEssential)	(cls or NonEssential)	(noHit or NonEssential)	(mlr2852 or NonEssential)	(cls or NonEssential)	(noHit or NonEssential)
rxnCL2	Cardiolipin synthase (C64:0)	cpdPG12_c0 (2) <==> cpd00100_c0 (1) + cpdCL2_c0 (1)	Phosphatidylglycerol-1_2-palmitic-2-palmitic_c0 (2) <==> Glycerol_c0 (1) + Cardiolipin-1_2-(1_2-palmitic)_c0 (1)	TRUE	R02030	2.7.8.41	(smc02076 or NonEssential)	(Cls or NonEssential)	Predicted		Cls appears to be the only cardiolipin synthase in the S. meliloti genome based on sequence similarity. However, its activity in S. meliloti has not been confirmed, although the Cls in Rhizobium etli has been (Sandoval-Calderón et al 2009), and it has not been confirmed to be the only enzyme capable of performing this reaction (only Cls has this activity in R. etli). smc02076 appeared non-essenti…		(Smed_1155 or NonEssential)	(NGR_c13620 or NonEssential)	(OV14_2604 or NonEssential)	(cls or NonEssential)	(cls or NonEssential)	(cls or NonEssential)	(noHit or NonEssential)	(mlr2852 or NonEssential)	(cls or NonEssential)	(noHit or NonEssential)
rxnCL3	Cardiolipin synthase (C68:4)	cpdPG18_c0 (2) <==> cpd00100_c0 (1) + cpdCL3_c0 (1)	Phosphatidylglycerol-1-cis-vaccenoyl-2-palmitoleoyl_c0 (2) <==> Glycerol_c0 (1) + Cardiolipin-1_2-(1-cis-vaccenoyl-2-palmitoleoyl)_c0 (1)	TRUE	R02030	2.7.8.41	(smc02076 or NonEssential)	(Cls or NonEssential)	Predicted		Cls appears to be the only cardiolipin synthase in the S. meliloti genome based on sequence similarity. However, its activity in S. meliloti has not been confirmed, although the Cls in Rhizobium etli has been (Sandoval-Calderón et al 2009), and it has not been confirmed to be the only enzyme capable of performing this reaction (only Cls has this activity in R. etli). smc02076 appeared non-essenti…		(Smed_1155 or NonEssential)	(NGR_c13620 or NonEssential)	(OV14_2604 or NonEssential)	(cls or NonEssential)	(cls or NonEssential)	(cls or NonEssential)	(noHit or NonEssential)	(mlr2852 or NonEssential)	(cls or NonEssential)	(noHit or NonEssential)
rxnCL4	Cardiolipin synthase (C68:2)	cpdPG22_c0 (2) <==> cpd00100_c0 (1) + cpdCL4_c0 (1)	Phosphatidylglycerol-1-cis-vaccenoyl-2-palmitic_c0 (2) <==> Glycerol_c0 (1) + Cardiolipin-1_2-(1-cis-vaccenoyl-2-palmitic)_c0 (1)	TRUE	R02030	2.7.8.41	(smc02076 or NonEssential)	(Cls or NonEssential)	Predicted		Cls appears to be the only cardiolipin synthase in the S. meliloti genome based on sequence similarity. However, its activity in S. meliloti has not been confirmed, although the Cls in Rhizobium etli has been (Sandoval-Calderón et al 2009), and it has not been confirmed to be the only enzyme capable of performing this reaction (only Cls has this activity in R. etli). smc02076 appeared non-essenti…		(Smed_1155 or NonEssential)	(NGR_c13620 or NonEssential)	(OV14_2604 or NonEssential)	(cls or NonEssential)	(cls or NonEssential)	(cls or NonEssential)	(noHit or NonEssential)	(mlr2852 or NonEssential)	(cls or NonEssential)	(noHit or NonEssential)
rxnCL5	Cardiolipin synthase (C68:2 2)	cpdPG26_c0 (2) <==> cpd00100_c0 (1) + cpdCL5_c0 (1)	Phosphatidylglycerol-1-palmitic-2-cis-vaccenoyl_c0 (2) <==> Glycerol_c0 (1) + Cardiolipin-1_2-(1-palmitoleoyl-2-palmitic)_c0 (1)	TRUE	R02030	2.7.8.41	(smc02076 or NonEssential)	(Cls or NonEssential)	Predicted		Cls appears to be the only cardiolipin synthase in the S. meliloti genome based on sequence similarity. However, its activity in S. meliloti has not been confirmed, although the Cls in Rhizobium etli has been (Sandoval-Calderón et al 2009), and it has not been confirmed to be the only enzyme capable of performing this reaction (only Cls has this activity in R. etli). smc02076 appeared non-essenti…		(Smed_1155 or NonEssential)	(NGR_c13620 or NonEssential)	(OV14_2604 or NonEssential)	(cls or NonEssential)	(cls or NonEssential)	(cls or NonEssential)	(noHit or NonEssential)	(mlr2852 or NonEssential)	(cls or NonEssential)	(noHit or NonEssential)
rxnCL6	Cardiolipin synthase (C70:2)	cpdPG27_c0 (2) <==> cpd00100_c0 (1) + cpdCL6_c0 (1)	Phosphatidylglycerol-1-cis-vaccenoyl-2-palmitoleoyl(cyclopropanated)_c0 (2) <==> Glycerol_c0 (1) + Cardiolipin-1_2-(1-cis-vaccenoyl-2-palmitoleoyl(cyclopropanated))_c0 (1)	TRUE	R02030	2.7.8.41	(smc02076 or NonEssential)	(Cls or NonEssential)	Predicted		Cls appears to be the only cardiolipin synthase in the S. meliloti genome based on sequence similarity. However, its activity in S. meliloti has not been confirmed, although the Cls in Rhizobium etli has been (Sandoval-Calderón et al 2009), and it has not been confirmed to be the only enzyme capable of performing this reaction (only Cls has this activity in R. etli). smc02076 appeared non-essenti…		(Smed_1155 or NonEssential)	(NGR_c13620 or NonEssential)	(OV14_2604 or NonEssential)	(cls or NonEssential)	(cls or NonEssential)	(cls or NonEssential)	(noHit or NonEssential)	(mlr2852 or NonEssential)	(cls or NonEssential)	(noHit or NonEssential)
rxnCL7	Cardiolipin synthase (C70:2 2)	cpdPG28_c0 (2) <==> cpd00100_c0 (1) + cpdCL7_c0 (1)	Phosphatidylglycerol-1-cis-vaccenoyl(cyclopropanated)-2-palmitoleoyl_c0 (2) <==> Glycerol_c0 (1) + Cardiolipin-1_2-(1-cis-vaccenoyl(cyclopropanated)-2-palmitoleoyl)_c0 (1)	TRUE	R02030	2.7.8.41	(smc02076 or NonEssential)	(Cls or NonEssential)	Predicted		Cls appears to be the only cardiolipin synthase in the S. meliloti genome based on sequence similarity. However, its activity in S. meliloti has not been confirmed, although the Cls in Rhizobium etli has been (Sandoval-Calderón et al 2009), and it has not been confirmed to be the only enzyme capable of performing this reaction (only Cls has this activity in R. etli). smc02076 appeared non-essenti…		(Smed_1155 or NonEssential)	(NGR_c13620 or NonEssential)	(OV14_2604 or NonEssential)	(cls or NonEssential)	(cls or NonEssential)	(cls or NonEssential)	(noHit or NonEssential)	(mlr2852 or NonEssential)	(cls or NonEssential)	(noHit or NonEssential)
rxnCL8	Cardiolipin synthase (C70:2)	cpdPG34_c0 (2) <==> cpd00100_c0 (1) + cpdCL8_c0 (1)	Phosphatidylglycerol-1-cis-vaccenoyl(cyclopropanated)-2-palmitic_c0 (2) <==> Glycerol_c0 (1) + Cardiolipin-1_2-(1-cis-vaccenoyl(cyclopropanated)-2-palmitic)_c0 (1)	TRUE	R02030	2.7.8.41	(smc02076 or NonEssential)	(Cls or NonEssential)	Predicted		Cls appears to be the only cardiolipin synthase in the S. meliloti genome based on sequence similarity. However, its activity in S. meliloti has not been confirmed, although the Cls in Rhizobium etli has been (Sandoval-Calderón et al 2009), and it has not been confirmed to be the only enzyme capable of performing this reaction (only Cls has this activity in R. etli). smc02076 appeared non-essenti…		(Smed_1155 or NonEssential)	(NGR_c13620 or NonEssential)	(OV14_2604 or NonEssential)	(cls or NonEssential)	(cls or NonEssential)	(cls or NonEssential)	(noHit or NonEssential)	(mlr2852 or NonEssential)	(cls or NonEssential)	(noHit or NonEssential)
rxnCL9	Cardiolipin synthase (C72:4)	cpdPG38_c0 (2) <==> cpd00100_c0 (1) + cpdCL9_c0 (1)	Phosphatidylglycerol-1-cis-vaccenoyl-2-cis-vaccenoyl_c0 (2) <==> Glycerol_c0 (1) + Cardiolipin-1_2-(1-cis-vaccenoyl-2-cis-vaccenoyl)_c0 (1)	TRUE	R02030	2.7.8.41	(smc02076 or NonEssential)	(Cls or NonEssential)	Predicted		Cls appears to be the only cardiolipin synthase in the S. meliloti genome based on sequence similarity. However, its activity in S. meliloti has not been confirmed, although the Cls in Rhizobium etli has been (Sandoval-Calderón et al 2009), and it has not been confirmed to be the only enzyme capable of performing this reaction (only Cls has this activity in R. etli). smc02076 appeared non-essenti…		(Smed_1155 or NonEssential)	(NGR_c13620 or NonEssential)	(OV14_2604 or NonEssential)	(cls or NonEssential)	(cls or NonEssential)	(cls or NonEssential)	(noHit or NonEssential)	(mlr2852 or NonEssential)	(cls or NonEssential)	(noHit or NonEssential)
rxnCL10	Cardiolipin synthase (C74:4)	cpdPG39_c0 (2) <==> cpd00100_c0 (1) + cpdCL10_c0 (1)	Phosphatidylglycerol-1-cis-vaccenoyl(cyclopropanated)-2-cis-vaccenoyl_c0 (2) <==> Glycerol_c0 (1) + Cardiolipin-1_2-(1-cis-vaccenoyl(cyclopropanated)-2-cis-vaccenoyl)_c0 (1)	TRUE	R02030	2.7.8.41	(smc02076 or NonEssential)	(Cls or NonEssential)	Predicted		Cls appears to be the only cardiolipin synthase in the S. meliloti genome based on sequence similarity. However, its activity in S. meliloti has not been confirmed, although the Cls in Rhizobium etli has been (Sandoval-Calderón et al 2009), and it has not been confirmed to be the only enzyme capable of performing this reaction (only Cls has this activity in R. etli). smc02076 appeared non-essenti…		(Smed_1155 or NonEssential)	(NGR_c13620 or NonEssential)	(OV14_2604 or NonEssential)	(cls or NonEssential)	(cls or NonEssential)	(cls or NonEssential)	(noHit or NonEssential)	(mlr2852 or NonEssential)	(cls or NonEssential)	(noHit or NonEssential)
rxnCL11	Cardiolipin synthase (C76:4)	cpdPG40_c0 (2) <==> cpd00100_c0 (1) + cpdCL11_c0 (1)	Phosphatidylglycerol-1-cis-vaccenoyl(cyclopropanated)-2-cis-vaccenoyl(cyclopropanated)_c0 (2) <==> Glycerol_c0 (1) + Cardiolipin-1_2-(1-cis-vaccenoyl(cyclopropanated)-2-cis-vaccenoyl(cyclopropanated))_c0 (1)	TRUE	R02030	2.7.8.41	(smc02076 or NonEssential)	(Cls or NonEssential)	Predicted		Cls appears to be the only cardiolipin synthase in the S. meliloti genome based on sequence similarity. However, its activity in S. meliloti has not been confirmed, although the Cls in Rhizobium etli has been (Sandoval-Calderón et al 2009), and it has not been confirmed to be the only enzyme capable of performing this reaction (only Cls has this activity in R. etli). smc02076 appeared non-essenti…		(Smed_1155 or NonEssential)	(NGR_c13620 or NonEssential)	(OV14_2604 or NonEssential)	(cls or NonEssential)	(cls or NonEssential)	(cls or NonEssential)	(noHit or NonEssential)	(mlr2852 or NonEssential)	(cls or NonEssential)	(noHit or NonEssential)
rxn00615	Glycerol kinase	cpd00002_c0 (1) + cpd00100_c0 (1) <==> cpd00080_c0 (1) + cpd00008_c0 (1)	ATP_c0 (1) + Glycerol_c0 (1) <==> Glycerol_3_phosphate_c0 (1) + ADP_c0 (1)	TRUE	R00847	2.7.1.30	smb21009	GlpK	Experimental	Aneja and Charles 1999	This reaction has been included here as the synthesis of cardiolipid is associated with the release of a glycerol molecule, and this must be removed for the model to function. However, GlpK is not normally essential, presumably as the glycerol can be exported instead or metabolized through other pathways.		Smed_4501	glpK	glpK	glpK1	glpKch2	glpK	noHit	mll0700	noHit	glpK
rxnCL	Overall CL reaction	cpdCL1_c0 (0.4) + cpdCL2_c0 (1.4) + cpdCL3_c0 (1.8) + cpdCL4_c0 (24.9) + cpdCL5_c0 (1.7) + cpdCL6_c0 (1.1) + cpdCL7_c0 (1.1) + cpdCL8_c0 (2.6) + cpdCL9_c0 (57.3) + cpdCL10_c0 (7.3) + cpdCL11_c0 (0.3) ==> cpdCL_c0 (1)	Cardiolipin-1_2-(1-palmitoleoyl-2-palmitic)_c0 (0.4) + Cardiolipin-1_2-(1_2-palmitic)_c0 (1.4) + Cardiolipin-1_2-(1-cis-vaccenoyl-2-palmitoleoyl)_c0 (1.8) + Cardiolipin-1_2-(1-cis-vaccenoyl-2-palmitic)_c0 (24.9) + Cardiolipin-1_2-(1-palmitoleoyl-2-palmitic)_c0 (1.7) + Cardiolipin-1_2-(1-cis-vaccenoyl-2-palmitoleoyl(cyclopropanated))_c0 (1.1) + Cardiolipin-1_2-(1-cis-vaccenoyl(cyclopropanated)-2-p…	FALSE					Predicted		A reaction to combine the different CLs in the desired ratio. The ratio of CLs in S. meliloti has not been reported. But as CLs are formed by the condensation of two PG molecules, we used the same ratio as that reported for PGs as an approximation (Basconcillo et al 2009b).
Phosphatidylethanolamine biosynthesis
rxnPE1	Phosphatidylserine syntase (34:2)	cpdPG16_c0 (1) + cpd00054_c0 (1) ==> cpd00067_c0 (1) + cpdPE1_c0 (1) + cpd00046_c0 (1)	CDP-1-cis-vaccenoyl-2-palmitoleoyl-sn-glycerol-3-phosphate_c0 (1) + L_Serine_c0 (1) ==> H_c0 (1) + Phosphatidylserine-1-cis-vaccenoyl-2-palmitoleoyl (1) + CMP_c0 (1)	FALSE	R01800	2.7.8.8	smc00552	PssA	Experimental	Sohlenkamp et al 2004; This study			Smed_0724	pssA	pssA	RL1532	pssA1	pssA	RL73_05665	mlr7822	pssA	pssA
rxnPE2	Phosphatidylserine decarboxylase (34:2)	cpd00067_c0 (2) + cpdPE1_c0 (1) <==> cpdPE2_c0 (1) + cpd00011_c0 (1)	H_c0 (2) + Phosphatidylserine-1-cis-vaccenoyl-2-palmitoleoyl (1) <==> Phosphatidylethanolamine-1-cis-vaccenoyl-2-palmitoleoyl_c0 (1) + CO2_c0 (1)	TRUE	R02055	4.1.1.65	smc00551	Psd	Experimental	Vences-Guzmán et al 2008; This study			Smed_0723	NGR_c08720	OV14_2141	psd	psd	psd	RL73_05660	mlr7821	DK53_468	blr3796
rxnPE3	Phosphatidylserine syntase (34:1)	cpdPG20_c0 (1) + cpd00054_c0 (1) ==> cpd00067_c0 (1) + cpdPE3_c0 (1) + cpd00046_c0 (1)	CDP-1-cis-vaccenoyl-2-palmitic-sn-glycerol-3-phosphate_c0 (1) + L_Serine_c0 (1) ==> H_c0 (1) + Phosphatidylserine-1-cis-vaccenoyl-2-palmitic (1) + CMP_c0 (1)	FALSE	R01800	2.7.8.8	smc00552	PssA	Experimental	Sohlenkamp et al 2004; This study			Smed_0724	pssA	pssA	RL1532	pssA1	pssA	RL73_05665	mlr7822	pssA	pssA
rxnPE4	Phosphatidylserine decarboxylase (34:1)	cpd00067_c0 (2) + cpdPE3_c0 (1) <==> cpdPE4_c0 (1) + cpd00011_c0 (1)	H_c0 (2) + Phosphatidylserine-1-cis-vaccenoyl-2-palmitic (1) <==> Phosphatidylethanolamine-1-cis-vaccenoyl-2-palmitic_c0 (1) + CO2_c0 (1)	TRUE	R02055	4.1.1.65	smc00551	Psd	Experimental	Vences-Guzmán et al 2008; This study			Smed_0723	NGR_c08720	OV14_2141	psd	psd	psd	RL73_05660	mlr7821	DK53_468	blr3796
rxnPE5	PE(C35:2) cyclopropanation	cpdPE2_c0 (1) + cpd00017_c0 (1) ==> cpd00067_c0 (1) + cpdPE5_c0 (1) + cpd00019_c0 (1)	Phosphatidylethanolamine-1-cis-vaccenoyl-2-palmitoleoyl_c0 (1) + S_Adenosyl_L_methionine_c0 (1) ==> H_c0 (1) + Phosphatidylethanolamine-1-cis-vaccenoyl-2-palmitoloeyl(cyclopropanated)_c0 (1) + S_Adenosyl_homocysteine_c0 (1)	FALSE	R03411	2.1.1.79	smc02654	Cfa2	Experimental	Basconcillo et al 2009a			Smed_0680	NGR_c08270	OV14_2091	acpS	acpS	acpS	RL73_03545	mlr7761	acpS	acpS
rxnPE6	PE(C35:2 2) cyclopropanation	cpdPE2_c0 (1) + cpd00017_c0 (1) ==> cpd00067_c0 (1) + cpdPE6_c0 (1) + cpd00019_c0 (1)	Phosphatidylethanolamine-1-cis-vaccenoyl-2-palmitoleoyl_c0 (1) + S_Adenosyl_L_methionine_c0 (1) ==> H_c0 (1) + Phosphatidylethanolamine-1-cis-vaccenoyl(cyclopropanated)-2-palmitoloeyl_c0 (1) + S_Adenosyl_homocysteine_c0 (1)	FALSE	R03411	2.1.1.79	smc02654	Cfa2	Experimental	Basconcillo et al 2009a			Smed_0680	NGR_c08270	OV14_2091	acpS	acpS	acpS	RL73_03545	mlr7761	acpS	acpS
rxnPE7	PE(C35:1) cyclopropanation	cpdPE4_c0 (1) + cpd00017_c0 (1) ==> cpd00067_c0 (1) + cpdPE7_c0 (1) + cpd00019_c0 (1)	Phosphatidylethanolamine-1-cis-vaccenoyl-2-palmitic_c0 (1) + S_Adenosyl_L_methionine_c0 (1) ==> H_c0 (1) + Phosphatidylethanolamine-1-cis-vaccenoyl(cyclopropanated)-2-palmitic_c0 (1) + S_Adenosyl_homocysteine_c0 (1)	FALSE	R03411	2.1.1.79	smc02654	Cfa2	Experimental	Basconcillo et al 2009a			Smed_0680	NGR_c08270	OV14_2091	acpS	acpS	acpS	RL73_03545	mlr7761	acpS	acpS
rxnPE8	Phosphatidylserine syntase (36:2)	cpdPG36_c0 (1) + cpd00054_c0 (1) ==> cpd00067_c0 (1) + cpdPE8_c0 (1) + cpd00046_c0 (1)	CDP-1-cis-vaccenoyl-2-cis-vaccenoyl-sn-glycerol-3-phosphate_c0 (1) + L_Serine_c0 (1) ==> H_c0 (1) + Phosphatidylserine-1_2-cis-vaccenoyl_c0 (1) + CMP_c0 (1)	FALSE	R01800	2.7.8.8	smc00552	PssA	Experimental	Sohlenkamp et al 2004; This study			Smed_0724	pssA	pssA	RL1532	pssA1	pssA	RL73_05665	mlr7822	pssA	pssA
rxnPE9	Phosphatidylserine decarboxylase (36:2)	cpd00067_c0 (2) + cpdPE8_c0 (1) <==> cpdPE9_c0 (1) + cpd00011_c0 (1)	H_c0 (2) + Phosphatidylserine-1_2-cis-vaccenoyl_c0 (1) <==> Phosphatidylethanolamine-1_2-cis-vaccenoyl_c0 (1) + CO2_c0 (1)	TRUE	R02055	4.1.1.65	smc00551	Psd	Experimental	Vences-Guzmán et al 2008; This study			Smed_0723	NGR_c08720	OV14_2141	psd	psd	psd	RL73_05660	mlr7821	DK53_468	blr3796
rxnPE10	PE(C36:2) cyclopropanation	cpdPE9_c0 (1) + cpd00017_c0 (1) ==> cpd00067_c0 (1) + cpdPE10_c0 (1) + cpd00019_c0 (1)	Phosphatidylethanolamine-1_2-cis-vaccenoyl_c0 (1) + S_Adenosyl_L_methionine_c0 (1) ==> H_c0 (1) + Phosphatidylethanolamine-1-cis-vaccenoyl(cyclopropanated)-2-cis-vaccenoyl_c0 (1) + S_Adenosyl_homocysteine_c0 (1)	FALSE	R03411	2.1.1.79	smc02654	Cfa2	Experimental	Basconcillo et al 2009a			Smed_0680	NGR_c08270	OV14_2091	acpS	acpS	acpS	RL73_03545	mlr7761	acpS	acpS
rxnPE11	PE(C37:2) cyclopropanation	cpdPE10_c0 (1) + cpd00017_c0 (1) ==> cpd00067_c0 (1) + cpdPE11_c0 (1) + cpd00019_c0 (1)	Phosphatidylethanolamine-1-cis-vaccenoyl(cyclopropanated)-2-cis-vaccenoyl_c0 (1) + S_Adenosyl_L_methionine_c0 (1) ==> H_c0 (1) + Phosphatidylethanolamine-1-cis-vaccenoyl(cyclopropanated)-2-cis-vaccenoyl(cyclopropanated)_c0 (1) + S_Adenosyl_homocysteine_c0 (1)	FALSE	R03411	2.1.1.79	smc02654	Cfa2	Experimental	Basconcillo et al 2009a			Smed_0680	NGR_c08270	OV14_2091	acpS	acpS	acpS	RL73_03545	mlr7761	acpS	acpS
rxnPE	Overall PE reaction	cpdPE2_c0 (0.9) + cpdPE4_c0 (7.0) + cpdPE5_c0 (1.05) + cpdPE6_c0 (1.05) + cpdPE7_c0 (2.9) + cpdPE9_c0 (47.2) + cpdPE10_c0 (35.5) + cpdPE11_c0 (4.4) ==> cpdPE_c0 (1)	Phosphatidylethanolamine-1-cis-vaccenoyl-2-palmitoleoyl_c0 (0.9) + Phosphatidylethanolamine-1-cis-vaccenoyl-2-palmitic_c0 (7.0) + Phosphatidylethanolamine-1-cis-vaccenoyl-2-palmitoloeyl(cyclopropanated)_c0 (1.05) + Phosphatidylethanolamine-1-cis-vaccenoyl(cyclopropanated)-2-palmitoloeyl_c0 (1.05) + Phosphatidylethanolamine-1-cis-vaccenoyl(cyclopropanated)-2-palmitic_c0 (2.9) + Phosphatidylethanol…	FALSE					Predicted		A reaction to combine the different PEs in the desired ratio. As the ratio of PEs in S. meliloti has not been studied, the ratio was approximated by using the same as the ratio of PCs as PEs are a substrate for the synthesis of PCs (Basconcillo et al 2009b).
Phosphatidylcholine biosynthesis
rxnMMPE1	PE methylation (34:2)	cpdPE2_c0 (1) + cpd00017_c0 (1) <==> cpd00019_c0 (1) + cpdMMPE1_c0 (1)	Phosphatidylethanolamine-1-cis-vaccenoyl-2-palmitoleoyl_c0 (1) + S_Adenosyl_L_methionine_c0 (1) <==> S_Adenosyl_homocysteine_c0 (1) + Monomethyl-phosphatidylethanolamine-1-cis-vaccenoyl-2-palmitoleoyl_c0 (1)	TRUE	R02056	2.1.1.17	smc00414	PmtA	Experimental	de Rudder et al 2000; This study			Smed_3542	NGR_c36740	OV14_1225	pmtA	RHE_CH00316	Atu0300	RL73_00755	mll4753	DK53_2045	pmtA
rxnDMPE1	MMPE methylation (34:2)	cpdMMPE1_c0 (1) + cpd00017_c0 (1) <==> cpd00019_c0 (1) + cpdDMPE1_c0 (1)	Monomethyl-phosphatidylethanolamine-1-cis-vaccenoyl-2-palmitoleoyl_c0 (1) + S_Adenosyl_L_methionine_c0 (1) <==> S_Adenosyl_homocysteine_c0 (1) + Dimethyl-phosphatidylethanolamine-1-cis-vaccenoyl-2-palmitoleoyl_c0 (1)	TRUE	R03424	2.1.1.71	smc00414	PmtA	Experimental	de Rudder et al 2000; This study			Smed_3542	NGR_c36740	OV14_1225	pmtA	RHE_CH00316	Atu0300	RL73_00755	mll4753	DK53_2045	pmtA
rxnPC1	DMPE methylation (34:2)	cpdDMPE1_c0 (1) + cpd00017_c0 (1) <==> cpd00019_c0 (1) + cpdPC1_c0 (1)	Dimethyl-phosphatidylethanolamine-1-cis-vaccenoyl-2-palmitoleoyl_c0 (1) + S_Adenosyl_L_methionine_c0 (1) <==> S_Adenosyl_homocysteine_c0 (1) + Phosphatidylcholine-1-cis-vaccenoyl-2-palmitoleoyl_c0 (1)	TRUE	R01320	2.1.1.71	smc00414	PmtA	Experimental	de Rudder et al 2000; This study			Smed_3542	NGR_c36740	OV14_1225	pmtA	RHE_CH00316	Atu0300	RL73_00755	mll4753	DK53_2045	pmtA
rxnMMPE2	PE methylation (34:1)	cpdPE4_c0 (1) + cpd00017_c0 (1) <==> cpd00019_c0 (1) + cpdMMPE2_c0 (1)	Phosphatidylethanolamine-1-cis-vaccenoyl-2-palmitic_c0 (1) + S_Adenosyl_L_methionine_c0 (1) <==> S_Adenosyl_homocysteine_c0 (1) + Monomethyl-phosphatidylethanolamine-1-cis-vaccenoyl-2-palmitic_c0 (1)	TRUE	R02056	2.1.1.17	smc00414	PmtA	Experimental	de Rudder et al 2000; This study			Smed_3542	NGR_c36740	OV14_1225	pmtA	RHE_CH00316	Atu0300	RL73_00755	mll4753	DK53_2045	pmtA
rxnDMPE2	MMPE methylation (34:1)	cpdMMPE2_c0 (1) + cpd00017_c0 (1) <==> cpd00019_c0 (1) + cpdDMPE2_c0 (1)	Monomethyl-phosphatidylethanolamine-1-cis-vaccenoyl-2-palmitic_c0 (1) + S_Adenosyl_L_methionine_c0 (1) <==> S_Adenosyl_homocysteine_c0 (1) + Dimethyl-phosphatidylethanolamine-1-cis-vaccenoyl-2-palmitic_c0 (1)	TRUE	R03424	2.1.1.71	smc00414	PmtA	Experimental	de Rudder et al 2000; This study			Smed_3542	NGR_c36740	OV14_1225	pmtA	RHE_CH00316	Atu0300	RL73_00755	mll4753	DK53_2045	pmtA
rxnPC3	DMPE methylation (34:1)	cpdDMPE2_c0 (1) + cpd00017_c0 (1) <==> cpd00019_c0 (1) + cpdPC2_c0 (1)	Dimethyl-phosphatidylethanolamine-1-cis-vaccenoyl-2-palmitic_c0 (1) + S_Adenosyl_L_methionine_c0 (1) <==> S_Adenosyl_homocysteine_c0 (1) + Phosphatidylcholine-1-cis-vaccenoyl-2-palmitic_c0 (1)	TRUE	R01320	2.1.1.71	smc00414	PmtA	Experimental	de Rudder et al 2000; This study			Smed_3542	NGR_c36740	OV14_1225	pmtA	RHE_CH00316	Atu0300	RL73_00755	mll4753	DK53_2045	pmtA
rxnMMPE3	MMPE(C34:2) cyclopropanation	cpdMMPE1_c0 (1) + cpd00017_c0 (1) ==> cpd00067_c0 (1) + cpdMMPE3_c0 (1) + cpd00019_c0 (1)	Monomethyl-phosphatidylethanolamine-1-cis-vaccenoyl-2-palmitoleoyl_c0 (1) + S_Adenosyl_L_methionine_c0 (1) ==> H_c0 (1) + Monomethyl-phosphatidylethanolamine-1-cis-vaccenoyl-2-palmitoleoyl(cyclopropanated)_c0 (1) + S_Adenosyl_homocysteine_c0 (1)	FALSE	R03411	2.1.1.79	smc02654	Cfa2	Experimental	Basconcillo et al 2009a			Smed_0680	NGR_c08270	OV14_2091	acpS	acpS	acpS	RL73_03545	mlr7761	acpS	acpS
rxnPC5	PC(C34:2) cyclopropanation	cpdPC1_c0 (1) + cpd00017_c0 (1) ==> cpd00067_c0 (1) + cpdPC3_c0 (1) + cpd00019_c0 (1)	Phosphatidylcholine-1-cis-vaccenoyl-2-palmitoleoyl_c0 (1) + S_Adenosyl_L_methionine_c0 (1) ==> H_c0 (1) + Phosphatidylcholine-1-cis-vaccenoyl-2-palmitoleoyl(cyclopropanated)_c0 (1) + S_Adenosyl_homocysteine_c0 (1)	FALSE	R03411	2.1.1.79	smc02654	Cfa2	Experimental	Basconcillo et al 2009a			Smed_0680	NGR_c08270	OV14_2091	acpS	acpS	acpS	RL73_03545	mlr7761	acpS	acpS
rxnMMPE4	MMPE(C34:2 2) cyclopropanation	cpdMMPE1_c0 (1) + cpd00017_c0 (1) ==> cpd00067_c0 (1) + cpdMMPE4_c0 (1) + cpd00019_c0 (1)	Monomethyl-phosphatidylethanolamine-1-cis-vaccenoyl-2-palmitoleoyl_c0 (1) + S_Adenosyl_L_methionine_c0 (1) ==> H_c0 (1) + Monomethyl-phosphatidylethanolamine-1-cis-vaccenoyl(cyclopropanated)-2-palmitoleoyl_c0 (1) + S_Adenosyl_homocysteine_c0 (1)	FALSE	R03411	2.1.1.79	smc02654	Cfa2	Experimental	Basconcillo et al 2009a			Smed_0680	NGR_c08270	OV14_2091	acpS	acpS	acpS	RL73_03545	mlr7761	acpS	acpS
rxnPC6	PC(C34:2 2) cyclopropanation	cpdPC1_c0 (1) + cpd00017_c0 (1) ==> cpd00067_c0 (1) + cpdPC4_c0 (1) + cpd00019_c0 (1)	Phosphatidylcholine-1-cis-vaccenoyl-2-palmitoleoyl_c0 (1) + S_Adenosyl_L_methionine_c0 (1) ==> H_c0 (1) + Phosphatidylcholine-1-cis-vaccenoyl(cyclopropanated)-2-palmitoleoyl_c0 (1) + S_Adenosyl_homocysteine_c0 (1)	FALSE	R03411	2.1.1.79	smc02654	Cfa2	Experimental	Basconcillo et al 2009a			Smed_0680	NGR_c08270	OV14_2091	acpS	acpS	acpS	RL73_03545	mlr7761	acpS	acpS
rxnMMPE5	MMPE(C34:1) cyclopropanation	cpdMMPE2_c0 (1) + cpd00017_c0 (1) ==> cpd00067_c0 (1) + cpdMMPE5_c0 (1) + cpd00019_c0 (1)	Monomethyl-phosphatidylethanolamine-1-cis-vaccenoyl-2-palmitic_c0 (1) + S_Adenosyl_L_methionine_c0 (1) ==> H_c0 (1) + Monomethyl-phosphatidylethanolamine-1-cis-vaccenoyl(cyclopropanated)-2-palmitic_c0 (1) + S_Adenosyl_homocysteine_c0 (1)	FALSE	R03411	2.1.1.79	smc02654	Cfa2	Experimental	Basconcillo et al 2009a			Smed_0680	NGR_c08270	OV14_2091	acpS	acpS	acpS	RL73_03545	mlr7761	acpS	acpS
rxnPC7	PC(C34:1) cyclopropanation	cpdPC2_c0 (1) + cpd00017_c0 (1) ==> cpd00067_c0 (1) + cpdPC5_c0 (1) + cpd00019_c0 (1)	Phosphatidylcholine-1-cis-vaccenoyl-2-palmitic_c0 (1) + S_Adenosyl_L_methionine_c0 (1) ==> H_c0 (1) + Phosphatidylcholine-1-cis-vaccenoyl(cyclopropanated)-2-palmitic_c0 (1) + S_Adenosyl_homocysteine_c0 (1)	FALSE	R03411	2.1.1.79	smc02654	Cfa2	Experimental	Basconcillo et al 2009a			Smed_0680	NGR_c08270	OV14_2091	acpS	acpS	acpS	RL73_03545	mlr7761	acpS	acpS
rxnMMPE6	PE methylation (36:2)	cpdPE9_c0 (1) + cpd00017_c0 (1) <==> cpd00019_c0 (1) + cpdMMPE6_c0 (1)	Phosphatidylethanolamine-1_2-cis-vaccenoyl_c0 (1) + S_Adenosyl_L_methionine_c0 (1) <==> S_Adenosyl_homocysteine_c0 (1) + Monomethyl-phosphatidylethanolamine-1_2-cis-vaccenoyl_c0 (1)	TRUE	R02056	2.1.1.17	smc00414	PmtA	Experimental	de Rudder et al 2000; This study			Smed_3542	NGR_c36740	OV14_1225	pmtA	RHE_CH00316	Atu0300	RL73_00755	mll4753	DK53_2045	pmtA
rxnDMPE3	MMPE methylation (36:2)	cpdMMPE6_c0 (1) + cpd00017_c0 (1) <==> cpd00019_c0 (1) + cpdDMPE3_c0 (1)	Monomethyl-phosphatidylethanolamine-1_2-cis-vaccenoyl_c0 (1) + S_Adenosyl_L_methionine_c0 (1) <==> S_Adenosyl_homocysteine_c0 (1) + Dimethyl-phosphatidylethanolamine-1_2-cis-vaccenoyl_c0 (1)	TRUE	R03424	2.1.1.71	smc00414	PmtA	Experimental	de Rudder et al 2000; This study			Smed_3542	NGR_c36740	OV14_1225	pmtA	RHE_CH00316	Atu0300	RL73_00755	mll4753	DK53_2045	pmtA
rxnPC8	DMPE methylation (36:2)	cpdDMPE3_c0 (1) + cpd00017_c0 (1) <==> cpd00019_c0 (1) + cpdPC6_c0 (1)	Dimethyl-phosphatidylethanolamine-1_2-cis-vaccenoyl_c0 (1) + S_Adenosyl_L_methionine_c0 (1) <==> S_Adenosyl_homocysteine_c0 (1) + Phosphatidylcholine-1_2-cis-vaccenoyl_c0 (1)	TRUE	R01320	2.1.1.71	smc00414	PmtA	Experimental	de Rudder et al 2000; This study			Smed_3542	NGR_c36740	OV14_1225	pmtA	RHE_CH00316	Atu0300	RL73_00755	mll4753	DK53_2045	pmtA
rxnMMPE7	MMPE(C36:2) cyclopropanation	cpdMMPE6_c0 (1) + cpd00017_c0 (1) ==> cpd00067_c0 (1) + cpdMMPE7_c0 (1) + cpd00019_c0 (1)	Monomethyl-phosphatidylethanolamine-1_2-cis-vaccenoyl_c0 (1) + S_Adenosyl_L_methionine_c0 (1) ==> H_c0 (1) + Monomethyl-phosphatidylethanolamine-1-cis-vaccenoyl(cyclopropanated)-2-cis-vaccenoyl_c0 (1) + S_Adenosyl_homocysteine_c0 (1)	FALSE	R03411	2.1.1.79	smc02654	Cfa2	Experimental	Basconcillo et al 2009a			Smed_0680	NGR_c08270	OV14_2091	acpS	acpS	acpS	RL73_03545	mlr7761	acpS	acpS
rxnPC10	PC(C36:2) cyclopropanation	cpdPC6_c0 (1) + cpd00017_c0 (1) ==> cpd00067_c0 (1) + cpdPC7_c0 (1) + cpd00019_c0 (1)	Phosphatidylcholine-1_2-cis-vaccenoyl_c0 (1) + S_Adenosyl_L_methionine_c0 (1) ==> H_c0 (1) + Phosphatidylcholine-1-cis-vaccenoyl(cyclopropanated)-2-cis-vaccenoyl_c0 (1) + S_Adenosyl_homocysteine_c0 (1)	FALSE	R03411	2.1.1.79	smc02654	Cfa2	Experimental	Basconcillo et al 2009a			Smed_0680	NGR_c08270	OV14_2091	acpS	acpS	acpS	RL73_03545	mlr7761	acpS	acpS
rxnMMPE8	MMPE(C37:2) cyclopropanation	cpdMMPE7_c0 (1) + cpd00017_c0 (1) ==> cpd00067_c0 (1) + cpdMMPE8_c0 (1) + cpd00019_c0 (1)	Monomethyl-phosphatidylethanolamine-1-cis-vaccenoyl(cyclopropanated)-2-cis-vaccenoyl_c0 (1) + S_Adenosyl_L_methionine_c0 (1) ==> H_c0 (1) + Monomethyl-phosphatidylethanolamine-1-cis-vaccenoyl(cyclopropanated)-2-cis-vaccenoyl(cyclopropanated)_c0 (1) + S_Adenosyl_homocysteine_c0 (1)	FALSE	R03411	2.1.1.79	smc02654	Cfa2	Experimental	Basconcillo et al 2009a			Smed_0680	NGR_c08270	OV14_2091	acpS	acpS	acpS	RL73_03545	mlr7761	acpS	acpS
rxnPC11	PC(C37:2) cyclopropanation	cpdPC7_c0 (1) + cpd00017_c0 (1) ==> cpd00067_c0 (1) + cpdPC8_c0 (1) + cpd00019_c0 (1)	Phosphatidylcholine-1-cis-vaccenoyl(cyclopropanated)-2-cis-vaccenoyl_c0 (1) + S_Adenosyl_L_methionine_c0 (1) ==> H_c0 (1) + Phosphatidylcholine-1-cis-vaccenoyl(cyclopropanated)-2-cis-vaccenoyl(cyclopropanated)_c0 (1) + S_Adenosyl_homocysteine_c0 (1)	FALSE	R03411	2.1.1.79	smc02654	Cfa2	Experimental	Basconcillo et al 2009a			Smed_0680	NGR_c08270	OV14_2091	acpS	acpS	acpS	RL73_03545	mlr7761	acpS	acpS
rxnMMPE	Overall MMPE reaction	cpdMMPE1_c0 (0.9) + cpdMMPE2_c0 (7.0) + cpdMMPE3_c0 (1.05) + cpdMMPE4_c0 (1.05) + cpdMMPE5_c0 (2.9) + cpdMMPE6_c0 (47.2) + cpdMMPE7_c0 (35.5) + cpdMMPE8_c0 (4.4) ==> cpdMMPE_c0 (1)	Monomethyl-phosphatidylethanolamine-1-cis-vaccenoyl-2-palmitoleoyl_c0 (0.9) + Monomethyl-phosphatidylethanolamine-1-cis-vaccenoyl-2-palmitic_c0 (7.0) + Monomethyl-phosphatidylethanolamine-1-cis-vaccenoyl-2-palmitoleoyl(cyclopropanated)_c0 (1.05) + Monomethyl-phosphatidylethanolamine-1-cis-vaccenoyl(cyclopropanated)-2-palmitoleoyl_c0 (1.05) + Monomethyl-phosphatidylethanolamine-1-cis-vaccenoyl(cyc…	FALSE					Predicted		A reaction to combine the different MMPEs in the desired ratio. As the ratio of MMPEs in S. meliloti has not been studied, the ratio was approximated by using the same as the ratio of PCs as MMPEs are a substrate for the synthesis of PCs (Basconcillo et al 2009b).
rxnPC	Overall PC reaction	cpdPC1_c0 (0.9) + cpdPC2_c0 (7.0) + cpdPC3_c0 (1.05) + cpdPC4_c0 (1.05) + cpdPC5_c0 (2.9) + cpdPC6_c0 (47.2) + cpdPC7_c0 (35.5) + cpdPC8_c0 (4.4) ==> cpdPC_c0 (1)	Phosphatidylcholine-1-cis-vaccenoyl-2-palmitoleoyl_c0 (0.9) + Phosphatidylcholine-1-cis-vaccenoyl-2-palmitic_c0 (7.0) + Phosphatidylcholine-1-cis-vaccenoyl-2-palmitoleoyl(cyclopropanated)_c0 (1.05) + Phosphatidylcholine-1-cis-vaccenoyl(cyclopropanated)-2-palmitoleoyl_c0 (1.05) + Phosphatidylcholine-1-cis-vaccenoyl(cyclopropanated)-2-palmitic_c0 (2.9) + Phosphatidylcholine-1_2-cis-vaccenoyl_c0 (47…	FALSE					Experimental		A reaction to combine the different PCs in the correct ratio (Basconcillo et al 2009b).
Sulfoquinovosyldiacylglycerol biosynthesis
rxn04027	UDP-sulfoguinovose synthase	cpd00026_c0 (1) + cpd00081_c0 (1) <==> cpd00001_c0 (1) + cpd08358_c0 (1)	UDP_glucose_c0 (1) + Sulfite_c0 (1) <==> H2O_c0 (1) + UDP-6-sulfoquinovose (1)	TRUE	R05775	3.13.1.1	smc03961	SqdB	Experimental	Weissenmayer et al 2000			Smed_2633	sqdB	sqdB	sqdB	sqdB	noHit	noHit	noHit	noHit	noHit
rxnSL1	Diacylglycerol kinase (32:1)	cpdSL1_c0 (1) + cpd00002_c0 (1) <==> cpd00008_c0 (1) + cpdPG3_c0 (1)	1-palmitoleoyl-2-palmitic-sn-glycerol_c0 (1) + ATP_c0 (1) <==> ADP_c0 (1) + 1-palmitoleoyl-2-palmitic-sn-glycerol-3-phosphate_c0 (1)	TRUE	R02240	2.7.1.107	smc04213	DgkA	Experimental but incomplete	Miller et al 1992	Experimental data is consistent with DgkA having the annotated function. However, it is not know whether this is the only enzyme in the S. meliloti proteome capable of performing this reaction.		Smed_1602	dgkA	dgkA	dgkA	dgkA	dgk	RL73_06340	noHit	DK53_1001	noHit
rxnSL2	Sulfoquinovosyldiacylglycerol lipid biosynthesis (32:1)	cpd08358_c0 (1) + cpdSL1_c0 (1) <==> cpd00014_c0 (1) + cpdSL2_c0 (1) + cpd00067_c0 (1)	UDP-6-sulfoquinovose (1) + 1-palmitoleoyl-2-palmitic-sn-glycerol_c0 (1) <==> UDP_c0 (1) + Sulfoquinovosyl-1-palmitoleoyl-2-palmitic-sn-glycerol_c0 (1) + H_c0 (1)	TRUE	R06867	2.4.1.-	(smc04081 and smc03963)	(SqdD and SqdC)	Predicted		Prediction is based on sequence similarity and proximity to the SqdB gene known to be involved in sulfolipid biosynthesis (Weissenmayer et al 2000)		(Smed_2634 and Smed_2635)	(NGR_c27880 and NGR_c27890)	(OV14_0222 and OV14_0223)	(sqdD and sqdC)	(sqdD and sqdC)	(noHit and noHit)	(noHit and noHit)	(noHit and noHit)	(noHit and noHit)	(noHit and noHit)
rxnSL3	Diacylglycerol kinase (32:0)	cpdSL3_c0 (1) + cpd00002_c0 (1) <==> cpd00008_c0 (1) + cpdPG9_c0 (1)	1_2-palmitic-sn-glycerol_c0 (1) + ATP_c0 (1) <==> ADP_c0 (1) + 1_2-palmitic-sn-glycerol-3-phosphate_c0 (1)	TRUE	R02240	2.7.1.107	smc04213	DgkA	Experimental but incomplete	Miller et al 1992	Experimental data is consistent with DgkA catalyzing the annotated function. However, it is not know whether this is the only enzyme in the S. meliloti proteome capable of performing this reaction.		Smed_1602	dgkA	dgkA	dgkA	dgkA	dgk	RL73_06340	noHit	DK53_1001	noHit
rxnSL4	Sulfoquinovosyldiacylglycerol biosynthesis (32:0)	cpd08358_c0 (1) + cpdSL3_c0 (1) <==> cpd00014_c0 (1) + cpdSL4_c0 (1) + cpd00067_c0 (1)	UDP-6-sulfoquinovose (1) + 1_2-palmitic-sn-glycerol_c0 (1) <==> UDP_c0 (1) + Sulfoquinovosyl-1_2-palmitic-sn-glycerol_c0 (1) + H_c0 (1)	TRUE	R06867	2.4.1.-	(smc04081 and smc03963)	(SqdD and SqdC)	Predicted		Prediction is based on sequence similarity and proximity to the SqdB gene known to be involved in sulfolipid biosynthesis (Weissenmayer et al 2000)		(Smed_2634 and Smed_2635)	(NGR_c27880 and NGR_c27890)	(OV14_0222 and OV14_0223)	(sqdD and sqdC)	(sqdD and sqdC)	(noHit and noHit)	(noHit and noHit)	(noHit and noHit)	(noHit and noHit)	(noHit and noHit)
rxnSL5	Diacylglycerol kinase (34:2)	cpdSL5_c0 (1) + cpd00002_c0 (1) <==> cpd00008_c0 (1) + cpdPG15_c0 (1)	1-cis-vaccenoyl-2-palmitoleoyl_c0 (1) + ATP_c0 (1) <==> ADP_c0 (1) + 1-cis-vaccenoyl-2-palmitoleoyl-sn-glycerol-3-phosphate_c0 (1)	TRUE	R02240	2.7.1.107	smc04213	DgkA	Experimental but incomplete	Miller et al 1992	Experimental data is consistent with DgkA catalyzing the annotated function. However, it is not know whether this is the only enzyme in the S. meliloti proteome capable of performing this reaction.		Smed_1602	dgkA	dgkA	dgkA	dgkA	dgk	RL73_06340	noHit	DK53_1001	noHit
rxnSL6	Sulfoquinovosyldiacylglycerol biosynthesis (34:2)	cpd08358_c0 (1) + cpdSL5_c0 (1) <==> cpd00014_c0 (1) + cpdSL6_c0 (1) + cpd00067_c0 (1)	UDP-6-sulfoquinovose (1) + 1-cis-vaccenoyl-2-palmitoleoyl_c0 (1) <==> UDP_c0 (1) + Sulfoquinovosyl-1-cis-vaccenoyl-2-palmitoleoyl_c0 (1) + H_c0 (1)	TRUE	R06867	2.4.1.-	(smc04081 and smc03963)	(SqdD and SqdC)	Predicted		Prediction is based on sequence similarity and proximity to the SqdB gene known to be involved in sulfolipid biosynthesis (Weissenmayer et al 2000)		(Smed_2634 and Smed_2635)	(NGR_c27880 and NGR_c27890)	(OV14_0222 and OV14_0223)	(sqdD and sqdC)	(sqdD and sqdC)	(noHit and noHit)	(noHit and noHit)	(noHit and noHit)	(noHit and noHit)	(noHit and noHit)
rxnSL7	Diacylglycerol kinase (34:1)	cpdSL7_c0 (1) + cpd00002_c0 (1) <==> cpd00008_c0 (1) + cpdPG19_c0 (1)	1-cis-vaccenoyl-2-palmitic_c0 (1) + ATP_c0 (1) <==> ADP_c0 (1) + 1-cis-vaccenoyl-2-palmitic-sn-glycerol-3-phosphate_c0 (1)	TRUE	R02240	2.7.1.107	smc04213	DgkA	Experimental but incomplete	Miller et al 1992	Experimental data is consistent with DgkA catalyzing the annotated function. However, it is not know whether this is the only enzyme in the S. meliloti proteome capable of performing this reaction.		Smed_1602	dgkA	dgkA	dgkA	dgkA	dgk	RL73_06340	noHit	DK53_1001	noHit
rxnSL8	Sulfoquinovosyldiacylglycerol biosynthesis (34:1)	cpd08358_c0 (1) + cpdSL7_c0 (1) <==> cpd00014_c0 (1) + cpdSL8_c0 (1) + cpd00067_c0 (1)	UDP-6-sulfoquinovose (1) + 1-cis-vaccenoyl-2-palmitic_c0 (1) <==> UDP_c0 (1) + Sulfoquinovosyl-1-cis-vaccenoyl-2-palmitic_c0 (1) + H_c0 (1)	TRUE	R06867	2.4.1.-	(smc04081 and smc03963)	(SqdD and SqdC)	Predicted		Prediction is based on sequence similarity and proximity to the SqdB gene known to be involved in sulfolipid biosynthesis (Weissenmayer et al 2000)		(Smed_2634 and Smed_2635)	(NGR_c27880 and NGR_c27890)	(OV14_0222 and OV14_0223)	(sqdD and sqdC)	(sqdD and sqdC)	(noHit and noHit)	(noHit and noHit)	(noHit and noHit)	(noHit and noHit)	(noHit and noHit)
rxnSL9	Diacylglycerol kinase (34:1 2)	cpdSL9_c0 (1) + cpd00002_c0 (1) <==> cpd00008_c0 (1) + cpdPG23_c0 (1)	1-palmitic-2-cis-vaccenoyl_c0 (1) + ATP_c0 (1) <==> ADP_c0 (1) + 1-palmitic-2-cis-vaccenoyl-sn-glycerol-3-phosphate_c0 (1)	TRUE	R02240	2.7.1.107	smc04213	DgkA	Experimental but incomplete	Miller et al 1992	Experimental data is consistent with DgkA catalyzing the annotated function. However, it is not know whether this is the only enzyme in the S. meliloti proteome capable of performing this reaction.		Smed_1602	dgkA	dgkA	dgkA	dgkA	dgk	RL73_06340	noHit	DK53_1001	noHit
rxnSL10	Sulfoquinovosyldiacylglycerol biosynthesis (34:1 2)	cpd08358_c0 (1) + cpdSL9_c0 (1) <==> cpd00014_c0 (1) + cpdSL10_c0 (1) + cpd00067_c0 (1)	UDP-6-sulfoquinovose (1) + 1-palmitic-2-cis-vaccenoyl_c0 (1) <==> UDP_c0 (1) + Sulfoquinovosyl-1-palmitic-2-cis-vaccenoyl_c0 (1) + H_c0 (1)	TRUE	R06867	2.4.1.-	(smc04081 and smc03963)	(SqdD and SqdC)	Predicted		Prediction is based on sequence similarity and proximity to the SqdB gene known to be involved in sulfolipid biosynthesis (Weissenmayer et al 2000)		(Smed_2634 and Smed_2635)	(NGR_c27880 and NGR_c27890)	(OV14_0222 and OV14_0223)	(sqdD and sqdC)	(sqdD and sqdC)	(noHit and noHit)	(noHit and noHit)	(noHit and noHit)	(noHit and noHit)	(noHit and noHit)
rxnSL11	SL(C35:2) cyclopropanation	cpdSL6_c0 (1) + cpd00017_c0 (1) ==> cpd00067_c0 (1) + cpdSL11_c0 (1) + cpd00019_c0 (1)	Sulfoquinovosyl-1-cis-vaccenoyl-2-palmitoleoyl_c0 (1) + S_Adenosyl_L_methionine_c0 (1) ==> H_c0 (1) + Sulfoquinovosyl-1-cis-vaccenoyl-2-palmitoleoyl(cyclopropanated)_c0 (1) + S_Adenosyl_homocysteine_c0 (1)	FALSE	R03411	2.1.1.79	smc02654	Cfa2	Experimental	Basconcillo et al 2009a			Smed_0680	NGR_c08270	OV14_2091	acpS	acpS	acpS	RL73_03545	mlr7761	acpS	acpS
rxnSL12	SL(C35:2 2) cyclopropanation	cpdSL6_c0 (1) + cpd00017_c0 (1) ==> cpd00067_c0 (1) + cpdSL12_c0 (1) + cpd00019_c0 (1)	Sulfoquinovosyl-1-cis-vaccenoyl-2-palmitoleoyl_c0 (1) + S_Adenosyl_L_methionine_c0 (1) ==> H_c0 (1) + Sulfoquinovosyl-1-cis-vaccenoyl(cyclopropanated)-2-palmitoleoyl_c0 (1) + S_Adenosyl_homocysteine_c0 (1)	FALSE	R03411	2.1.1.79	smc02654	Cfa2	Experimental	Basconcillo et al 2009a			Smed_0680	NGR_c08270	OV14_2091	acpS	acpS	acpS	RL73_03545	mlr7761	acpS	acpS
rxnSL13	SL(C35:1) cyclopropanation	cpdSL8_c0 (1) + cpd00017_c0 (1) ==> cpd00067_c0 (1) + cpdSL13_c0 (1) + cpd00019_c0 (1)	Sulfoquinovosyl-1-cis-vaccenoyl-2-palmitic_c0 (1) + S_Adenosyl_L_methionine_c0 (1) ==> H_c0 (1) + Sulfoquinovosyl-1-cis-vaccenoyl(cyclopropanated)-2-palmitic_c0 (1) + S_Adenosyl_homocysteine_c0 (1)	FALSE	R03411	2.1.1.79	smc02654	Cfa2	Experimental	Basconcillo et al 2009a			Smed_0680	NGR_c08270	OV14_2091	acpS	acpS	acpS	RL73_03545	mlr7761	acpS	acpS
rxnSL14	C18:1-SN-glycerol-3-phosphate acetyltransferase (C16:0)	cpdUS16_c0 (1) + cpdPG8_c0 (1) ==> cpd11493_c0 (1) + cpdSL14_c0 (1)	cis-vaccenoyl-ACP_c0 (1) + 1-palmitic-sn-glycerol-3-phosphate_c0 (1) ==> ACP_c0 (1) + 1-palmitic-2-cis-vaccenoyl-sn-glycerol-3-phosphate_c0 (1)	FALSE	R02241	2.3.1.51	smc00714	PlsC	Experimental	Basconcillo et al 2009b			Smed_2546	plsC	plsC	RL4333	plsC	plsC	RL73_05690	mlr3529	DK53_1915	plsC
rxnSL15	Diacylglycerol kinase (35:2)	cpdSL15_c0 (1) + cpd00002_c0 (1) <==> cpd00008_c0 (1) + cpdSL14_c0 (1)	1-palmitic-2-cis-vaccenoyl-sn-glycerol_c0 (1) + ATP_c0 (1) <==> ADP_c0 (1) + 1-palmitic-2-cis-vaccenoyl-sn-glycerol-3-phosphate_c0 (1)	TRUE	R02240	2.7.1.107	smc04213	DgkA	Experimental but incomplete	Miller et al 1992	Experimental data is consistent with DgkA catalyzing the annotated function. However, it is not know whether this is the only enzyme in the S. meliloti proteome capable of performing this reaction.		Smed_1602	dgkA	dgkA	dgkA	dgkA	dgk	RL73_06340	noHit	DK53_1001	noHit
rxnSL16	Sulfoquinovosyldiacylglycerol biosynthesis (35:2)	cpd08358_c0 (1) + cpdSL15_c0 (1) <==> cpd00014_c0 (1) + cpdSL16_c0 (1) + cpd00067_c0 (1)	UDP-6-sulfoquinovose (1) + 1-palmitic-2-cis-vaccenoyl-sn-glycerol_c0 (1) <==> UDP_c0 (1) + Sulfoquinovosyl-1-palmitic-2-cis-vaccenoyl-sn-glycerol_c0 (1) + H_c0 (1)	TRUE	R06867	2.4.1.-	(smc04081 and smc03963)	(SqdD and SqdC)	Predicted		Prediction is based on sequence similarity and proximity to the SqdB gene known to be involved in sulfolipid biosynthesis (Weissenmayer et al 2000)		(Smed_2634 and Smed_2635)	(NGR_c27880 and NGR_c27890)	(OV14_0222 and OV14_0223)	(sqdD and sqdC)	(sqdD and sqdC)	(noHit and noHit)	(noHit and noHit)	(noHit and noHit)	(noHit and noHit)	(noHit and noHit)
rxnSL17	SL(C35:1 2) cyclopropanation	cpdSL16_c0 (1) + cpd00017_c0 (1) ==> cpd00067_c0 (1) + cpdSL17_c0 (1) + cpd00019_c0 (1)	Sulfoquinovosyl-1-palmitic-2-cis-vaccenoyl-sn-glycerol_c0 (1) + S_Adenosyl_L_methionine_c0 (1) ==> H_c0 (1) + Sulfoquinovosyl-1-palmitic-2-cis-vaccenoyl(cyclopropanated)-sn-glycerol_c0 (1) + S_Adenosyl_homocysteine_c0 (1)	FALSE	R03411	2.1.1.79	smc02654	Cfa2	Experimental	Basconcillo et al 2009a			Smed_0680	NGR_c08270	OV14_2091	acpS	acpS	acpS	RL73_03545	mlr7761	acpS	acpS
rxnSL18	Diacylglycerol kinase (36:2)	cpdSL18_c0 (1) + cpd00002_c0 (1) <==> cpd00008_c0 (1) + cpdPG35_c0 (1)	1-cis-vaccenoyl-2-cis-vaccenoyl-sn-glycerol_c0 (1) + ATP_c0 (1) <==> ADP_c0 (1) + 1-cis-vaccenoyl-2-cis-vaccenoyl-sn-glycerol-3-phosphate_c0 (1)	TRUE	R02240	2.7.1.107	smc04213	DgkA	Experimental but incomplete	Miller et al 1992	Experimental data is consistent with DgkA catalyzing the annotated function. However, it is not know whether this is the only enzyme in the S. meliloti proteome capable of performing this reaction.		Smed_1602	dgkA	dgkA	dgkA	dgkA	dgk	RL73_06340	noHit	DK53_1001	noHit
rxnSL19	Sulfoquinovosyldiacylglycerol biosynthesis (36:2)	cpd08358_c0 (1) + cpdSL18_c0 (1) <==> cpd00014_c0 (1) + cpdSL19_c0 (1) + cpd00067_c0 (1)	UDP-6-sulfoquinovose (1) + 1-cis-vaccenoyl-2-cis-vaccenoyl-sn-glycerol_c0 (1) <==> UDP_c0 (1) + Sulfoquinovosyl-1-cis-vaccenoyl-2-cis-vaccenoyl-sn-glycerol_c0 (1) + H_c0 (1)	TRUE	R06867	2.4.1.-	(smc04081 and smc03963)	(SqdD and SqdC)	Predicted		Prediction is based on sequence similarity and proximity to the SqdB gene known to be involved in sulfolipid biosynthesis (Weissenmayer et al 2000)		(Smed_2634 and Smed_2635)	(NGR_c27880 and NGR_c27890)	(OV14_0222 and OV14_0223)	(sqdD and sqdC)	(sqdD and sqdC)	(noHit and noHit)	(noHit and noHit)	(noHit and noHit)	(noHit and noHit)	(noHit and noHit)
rxnSL20	SL(C36:2) cyclopropanation	cpdSL19_c0 (1) + cpd00017_c0 (1) ==> cpd00067_c0 (1) + cpdSL20_c0 (1) + cpd00019_c0 (1)	Sulfoquinovosyl-1-cis-vaccenoyl-2-cis-vaccenoyl-sn-glycerol_c0 (1) + S_Adenosyl_L_methionine_c0 (1) ==> H_c0 (1) + Sulfoquinovosyl-1-cis-vaccenoyl(cyclopropanated)-2-cis-vaccenoyl-sn-glycerol_c0 (1) + S_Adenosyl_homocysteine_c0 (1)	FALSE	R03411	2.1.1.79	smc02654	Cfa2	Experimental	Basconcillo et al 2009a			Smed_0680	NGR_c08270	OV14_2091	acpS	acpS	acpS	RL73_03545	mlr7761	acpS	acpS
rxnSL21	SL(C37:2) cyclopropanation	cpdSL10_c0 (1) + cpd00017_c0 (1) ==> cpd00067_c0 (1) + cpdSL21_c0 (1) + cpd00019_c0 (1)	Sulfoquinovosyl-1-palmitic-2-cis-vaccenoyl_c0 (1) + S_Adenosyl_L_methionine_c0 (1) ==> H_c0 (1) + Sulfoquinovosyl-1-cis-vaccenoyl(cyclopropanated)-2-cis-vaccenoyl(cyclopropanated)-sn-glycerol_c0 (1) + S_Adenosyl_homocysteine_c0 (1)	FALSE	R03411	2.1.1.79	smc02654	Cfa2	Experimental	Basconcillo et al 2009a			Smed_0680	NGR_c08270	OV14_2091	acpS	acpS	acpS	RL73_03545	mlr7761	acpS	acpS
rxnSL22	C18:0-SN-glycerol-3-phosphate acetyltransferase (C18:1)	cpd15268_c0 (1) + cpdPG14_c0 (1) ==> cpd11493_c0 (1) + cpdSL22_c0 (1)	Octadecanoyl_ACP_c0 (1) + 1-cis-vaccenoyl-sn-glycerol-3-phosphate_c0 (1) ==> ACP_c0 (1) + 1-cis-vaccenoyl-2-steric-sn-glycerol-3-phosphate_c0 (1)	FALSE	R02241	2.3.1.51	smc00714	PlsC	Experimental	Basconcillo et al 2009b			Smed_2546	plsC	plsC	RL4333	plsC	plsC	RL73_05690	mlr3529	DK53_1915	plsC
rxnSL23	Diacylglycerol kinase (36:1)	cpdSL23_c0 (1) + cpd00002_c0 (1) <==> cpd00008_c0 (1) + cpdSL22_c0 (1)	1-cis-vaccenoyl-2-steric-sn-glycerol_c0 (1) + ATP_c0 (1) <==> ADP_c0 (1) + 1-cis-vaccenoyl-2-steric-sn-glycerol-3-phosphate_c0 (1)	TRUE	R02240	2.7.1.107	smc04213	DgkA	Experimental but incomplete	Miller et al 1992	Experimental data is consistent with DgkA catalyzing the annotated function. However, it is not know whether this is the only enzyme in the S. meliloti proteome capable of performing this reaction.		Smed_1602	dgkA	dgkA	dgkA	dgkA	dgk	RL73_06340	noHit	DK53_1001	noHit
rxnSL24	Sulfoquinovosyldiacylglycerol biosynthesis (36:1)	cpd08358_c0 (1) + cpdSL23_c0 (1) <==> cpd00014_c0 (1) + cpdSL24_c0 (1) + cpd00067_c0 (1)	UDP-6-sulfoquinovose (1) + 1-cis-vaccenoyl-2-steric-sn-glycerol_c0 (1) <==> UDP_c0 (1) + Sulfoquinovosyl-1-cis-vaccenoyl-steric-sn-glycerol_c0 (1) + H_c0 (1)	TRUE	R06867	2.4.1.-	(smc04081 and smc03963)	(SqdD and SqdC)	Predicted		Prediction is based on sequence similarity and proximity to the SqdB gene known to be involved in sulfolipid biosynthesis (Weissenmayer et al 2000)		(Smed_2634 and Smed_2635)	(NGR_c27880 and NGR_c27890)	(OV14_0222 and OV14_0223)	(sqdD and sqdC)	(sqdD and sqdC)	(noHit and noHit)	(noHit and noHit)	(noHit and noHit)	(noHit and noHit)	(noHit and noHit)
rxnSL	Overall SL reaction	cpdSL2_c0 (3.0) + cpdSL4_c0 (17.2) + cpdSL6_c0 (1.4) + cpdSL8_c0 (21.8) + cpdSL10_c0 (10.1) + cpdSL11_c0 (0.75) + cpdSL12_c0 (0.75) + cpdSL13_c0 (3.1) + cpdSL17_c0 (2.3) + cpdSL19_c0 (17.8) + cpdSL20_c0 (10.5) + cpdSL21_c0 (0.5) + cpdSL24_c0 (10.8) ==> cpdSL_c0 (1)	Sulfoquinovosyl-1-palmitoleoyl-2-palmitic-sn-glycerol_c0 (3.0) + Sulfoquinovosyl-1_2-palmitic-sn-glycerol_c0 (17.2) + Sulfoquinovosyl-1-cis-vaccenoyl-2-palmitoleoyl_c0 (1.4) + Sulfoquinovosyl-1-cis-vaccenoyl-2-palmitic_c0 (21.8) + Sulfoquinovosyl-1-palmitic-2-cis-vaccenoyl_c0 (10.1) + Sulfoquinovosyl-1-cis-vaccenoyl-2-palmitoleoyl(cyclopropanated)_c0 (0.75) + Sulfoquinovosyl-1-cis-vaccenoyl(cyclo…	FALSE					Experimental		A reaction to combine the different SLs in the correct ratio (Basconcillo et al 2009b).
Ornithine lipid biosynthesis
rxnOL1	Lyso-ornithine lipid biosynthesis (C16:0)	cpd00064_c0 (1) + cpd11476_c0 (1) <==> cpd11493_c0 (1) + cpdOL1_c0 (1)	Ornithine_c0 (1) + hexadecanoyl_acp_c0 (1) <==> ACP_c0 (1) + Lyso-ornithine-1-palmitic_c0 (1)	TRUE			smc01127	OlsB	Experimental	Gao et al 2004			Smed_0028	NGR_c00290	OV14_1313	RL0408	RHE_CH00390	Atu0344	noHit	mlr3216	DK53_160	noHit
rxnOL2	Ornithine lipid biosynthesis (C16:0/C18:1)	cpdOL1_c0 (1) + cpdUS16_c0 (1) <==> cpd11493_c0 (1) + cpdOL2_c0 (1)	Lyso-ornithine-1-palmitic_c0 (1) + cis-vaccenoyl-ACP_c0 (1) <==> ACP_c0 (1) + Ornithine-1-palmitic-2-cis-vaccenoyl_c0 (1)	TRUE			smc01116	OlsA	Experimental	Weissenmayer et al 2002			Smed_0039	NGR_c00400	OV14_1325	RL0396	olsA	plsC	noHit	mlr5533	DK53_2066	noHit
rxnOL3	Lyso-ornithine lipid biosynthesis (C18:0)	cpd00064_c0 (1) + cpd15268_c0 (1) <==> cpd11493_c0 (1) + cpdOL3_c0 (1)	Ornithine_c0 (1) + Octadecanoyl_ACP_c0 (1) <==> ACP_c0 (1) + Lyso-ornithine-1-steric_c0 (1)	TRUE			smc01127	OlsB	Experimental	Gao et al 2004			Smed_0028	NGR_c00290	OV14_1313	RL0408	RHE_CH00390	Atu0344	noHit	mlr3216	DK53_160	noHit
rxnOL4	Ornithine lipid biosynthesis (C18:0/C16:1)	cpdOL3_c0 (1) + cpdUS12_c0 (1) <==> cpd11493_c0 (1) + cpdOL4_c0 (1)	Lyso-ornithine-1-steric_c0 (1) + palmitoleoyl-ACP_c0 (1) <==> ACP_c0 (1) + Ornithine-1-steric-2-palmitoleoyl_c0 (1)	TRUE			smc01116	OlsA	Experimental	Weissenmayer et al 2002			Smed_0039	NGR_c00400	OV14_1325	RL0396	olsA	plsC	noHit	mlr5533	DK53_2066	noHit
rxnOL5	OL(C16:0/C18:1) cyclopropanation	cpdOL2_c0 (1) + cpd00017_c0 (1) ==> cpd00067_c0 (1) + cpdOL5_c0 (1) + cpd00019_c0 (1)	Ornithine-1-palmitic-2-cis-vaccenoyl_c0 (1) + S_Adenosyl_L_methionine_c0 (1) ==> H_c0 (1) + Ornithine-1-palmitic-2-cis-vaccenoyl(cyclopropanated)_c0 (1) + S_Adenosyl_homocysteine_c0 (1)	FALSE	R03411	2.1.1.79	smc02654	Cfa2	Experimental	Basconcillo et al 2009a			Smed_0680	NGR_c08270	OV14_2091	acpS	acpS	acpS	RL73_03545	mlr7761	acpS	acpS
rxnOL6	OL(C18:0/C16:1) cyclopropanation	cpdOL4_c0 (1) + cpd00017_c0 (1) ==> cpd00067_c0 (1) + cpdOL6_c0 (1) + cpd00019_c0 (1)	Ornithine-1-steric-2-palmitoleoyl_c0 (1) + S_Adenosyl_L_methionine_c0 (1) ==> H_c0 (1) + Ornithine-1-steric-2-palmitoleoyl(cyclopropanated)_c0 (1) + S_Adenosyl_homocysteine_c0 (1)	FALSE	R03411	2.1.1.79	smc02654	Cfa2	Experimental	Basconcillo et al 2009a			Smed_0680	NGR_c08270	OV14_2091	acpS	acpS	acpS	RL73_03545	mlr7761	acpS	acpS
rxnOL7	Lyso-ornithine lipid biosynthesis (C18:1)	cpd00064_c0 (1) + cpdUS16_c0 (1) <==> cpd11493_c0 (1) + cpdOL7_c0 (1)	Ornithine_c0 (1) + cis-vaccenoyl-ACP_c0 (1) <==> ACP_c0 (1) + Lyso-ornithine-1-cis-vaccenoyl_c0 (1)	TRUE			smc01127	OlsB	Experimental	Gao et al 2004			Smed_0028	NGR_c00290	OV14_1313	RL0408	RHE_CH00390	Atu0344	noHit	mlr3216	DK53_160	noHit
rxnOL8	Ornithine lipid biosynthesis (C18:1/C18:1)	cpdOL7_c0 (1) + cpdUS16_c0 (1) <==> cpd11493_c0 (1) + cpdOL8_c0 (1)	Lyso-ornithine-1-cis-vaccenoyl_c0 (1) + cis-vaccenoyl-ACP_c0 (1) <==> ACP_c0 (1) + Ornithine-1-cis-vaccenoyl-2-cis-vaccenoyl_c0 (1)	TRUE			smc01116	OlsA	Experimental	Weissenmayer et al 2002			Smed_0039	NGR_c00400	OV14_1325	RL0396	olsA	plsC	noHit	mlr5533	DK53_2066	noHit
rxnOL9	Ornithine lipid biosynthesis (C18:0/C18:1)	cpdOL3_c0 (1) + cpdUS16_c0 (1) <==> cpd11493_c0 (1) + cpdOL9_c0 (1)	Lyso-ornithine-1-steric_c0 (1) + cis-vaccenoyl-ACP_c0 (1) <==> ACP_c0 (1) + Ornithine-1-steric-2-cis-vaccenoyl_c0 (1)	TRUE			smc01116	OlsA	Experimental	Weissenmayer et al 2002			Smed_0039	NGR_c00400	OV14_1325	RL0396	olsA	plsC	noHit	mlr5533	DK53_2066	noHit
rxnOL10	OL(C18:1/C18:1) cyclopropanation	cpdOL8_c0 (1) + cpd00017_c0 (1) ==> cpd00067_c0 (1) + cpdOL10_c0 (1) + cpd00019_c0 (1)	Ornithine-1-cis-vaccenoyl-2-cis-vaccenoyl_c0 (1) + S_Adenosyl_L_methionine_c0 (1) ==> H_c0 (1) + Ornithine-1-cis-vaccenoyl-2-cis-vaccenoyl(cyclopropanated)_c0 (1) + S_Adenosyl_homocysteine_c0 (1)	FALSE	R03411	2.1.1.79	smc02654	Cfa2	Experimental	Basconcillo et al 2009a			Smed_0680	NGR_c08270	OV14_2091	acpS	acpS	acpS	RL73_03545	mlr7761	acpS	acpS
rxnOL11	OL(C18:0/C18:1) cyclopropanation	cpdOL9_c0 (1) + cpd00017_c0 (1) ==> cpd00067_c0 (1) + cpdOL11_c0 (1) + cpd00019_c0 (1)	Ornithine-1-steric-2-cis-vaccenoyl_c0 (1) + S_Adenosyl_L_methionine_c0 (1) ==> H_c0 (1) + Ornithine-1-steric-2-cis-vaccenoyl(cyclopropanated)_c0 (1) + S_Adenosyl_homocysteine_c0 (1)	FALSE	R03411	2.1.1.79	smc02654	Cfa2	Experimental	Basconcillo et al 2009a			Smed_0680	NGR_c08270	OV14_2091	acpS	acpS	acpS	RL73_03545	mlr7761	acpS	acpS
rxnOL12	OL(C18:1/C19:1) cyclopropanation	cpdOL10_c0 (1) + cpd00017_c0 (1) ==> cpd00067_c0 (1) + cpdOL12_c0 (1) + cpd00019_c0 (1)	Ornithine-1-cis-vaccenoyl-2-cis-vaccenoyl(cyclopropanated)_c0 (1) + S_Adenosyl_L_methionine_c0 (1) ==> H_c0 (1) + Ornithine-1-cis-vaccenoyl(cyclopropanated)-2-cis-vaccenoyl(cyclopropanated)_c0 (1) + S_Adenosyl_homocysteine_c0 (1)	FALSE	R03411	2.1.1.79	smc02654	Cfa2	Experimental	Basconcillo et al 2009a			Smed_0680	NGR_c08270	OV14_2091	acpS	acpS	acpS	RL73_03545	mlr7761	acpS	acpS
rxnOL	Overall OL reaction	cpdOL2_c0 (0.5) + cpdOL4_c0 (0.7) + cpdOL5_c0 (1.0) + cpdOL6_c0 (2.1) + cpdOL8_c0 (3.0) + cpdOL9_c0 (37.1) + cpdOL10_c0 (5.3) + cpdOL11_c0 (49.8) + cpdOL12_c0 (0.6) ==> cpdOL_c0 (1)	Ornithine-1-palmitic-2-cis-vaccenoyl_c0 (0.5) + Ornithine-1-steric-2-palmitoleoyl_c0 (0.7) + Ornithine-1-palmitic-2-cis-vaccenoyl(cyclopropanated)_c0 (1.0) + Ornithine-1-steric-2-palmitoleoyl(cyclopropanated)_c0 (2.1) + Ornithine-1-cis-vaccenoyl-2-cis-vaccenoyl_c0 (3.0) + Ornithine-1-steric-2-cis-vaccenoyl_c0 (37.1) + Ornithine-1-cis-vaccenoyl-2-cis-vaccenoyl(cyclopropanated)_c0 (5.3) + Ornithine…	FALSE					Experimental		A reaction to combine the different OLs in the correct ratio (Basconcillo et al 2009b).
Peptidoglycan biosynthesis
rxn00555	Glucosamine--fructose-6-phosphate aminotransferase	cpd00072_c0 (1) + cpd00053_c0 (1) <==> cpd00023_c0 (1) + cpd00288_c0 (1)	D_fructose_6_phosphate_c0 (1) + L_Glutamine_c0 (1) <==> L_Glutamate_c0 (1) + D_Glucosamine_phosphate_c0 (1)	TRUE	R00768	2.6.1.16	(smc00231 or sma0878)	(GlmS or NodM)	Experimental	Baev et al 1991; This study	In this Tn-seq data, glmS was only essential in the absence of pSymA and pSymB. This is consistent with GlmS having the annotated function and with a second copy encoded on pSymA or pSymB, which is presumably NodM as this protein has been experimentally shown to have this function.		(Smed_1404 or noHit)	(glmS2 or noHit)	(glmS2 or noHit)	(noHit or nodM)	(glmS1 or noHit)	(glmS or noHit)	(RL73_03520 or noHit)	(mlr6386 or noHit)	(noHit or glmS)	(glmS or noHit)
rxn01485	Phosphoglucosamine mutase	cpd03671_c0 (1) <==> cpd00288_c0 (1)	D_Glucosamine1_phosphate_c0 (1) <==> D_Glucosamine_phosphate_c0 (1)	TRUE	R02060	5.4.2.10	smc00637	GlmM	Experimental	This study			Smed_2622	NGR_c27750	OV14_0207	glmM	RHE_CH03457	mrsA	glmM	mll3879	glmM	bll7408
rxn03638	Glucosamine-1-phosphate N-acetyltransferase	cpd03671_c0 (1) + cpd00022_c0 (1) ==> cpd00067_c0 (1) + cpd02611_c0 (1) + cpd00010_c0 (1)	D_Glucosamine1_phosphate_c0 (1) + Acetyl_CoA_c0 (1) ==> H_c0 (1) + N_Acetyl_D_glucosamine1_phosphate_c0 (1) + CoA_c0 (1)	FALSE	R05332	2.3.1.157	smc00232	GlmU	Experimental	This study			Smed_1405	NGR_c14640	OV14_2776	RL2381	glmU	glmU	glmU	mll0836	glmU	glmU
rxn00293	N-acetylglucosamine-1-phosphate uridyltransferase	cpd02611_c0 (1) + cpd00062_c0 (1) <==> cpd00012_c0 (1) + cpd00037_c0 (1)	N_Acetyl_D_glucosamine1_phosphate_c0 (1) + UTP_c0 (1) <==> PPi_c0 (1) + UDP_N_acetylglucosamine_c0 (1)	TRUE	R00416	2.7.7.23	smc00232	GlmU	Experimental	This study			Smed_1405	NGR_c14640	OV14_2776	RL2381	glmU	glmU	glmU	mll0836	glmU	glmU
rxn00461	UDP-N-acetylglucosamine 1-carboxyvinyltransferase	cpd00061_c0 (1) + cpd00037_c0 (1) <==> cpd02820_c0 (1) + cpd00067_c0 (1) + cpd00009_c0 (1)	Phosphoenolpyruvate_c0 (1) + UDP_N_acetylglucosamine_c0 (1) <==> UDP_N_acetylglucosamine_enolpyruvate_c0 (1) + H_c0 (1) + Phosphate_c0 (1)	TRUE	R00660	2.5.1.7	smc02305	MurA	Experimental	This study			Smed_0206	murA	murA	murA	murA	murA	RL73_05050	mll6459	murA	murA
rxn02285	UDP-N-acetylenolpyruvoylglucosamine reductase	cpd00773_c0 (1) + cpd00006_c0 (1) <==> cpd02820_c0 (1) + cpd00067_c0 (1) + cpd00005_c0 (1)	UDP_MurNAc_c0 (1) + NADP_c0 (1) <==> UDP_N_acetylglucosamine_enolpyruvate_c0 (1) + H_c0 (1) + NADPH_c0 (1)	TRUE	R03192	1.3.1.98	smc01868	MurB	Experimental	This study			Smed_2080	murB	murB	RL3305	murB	murB	RL73_03625	mll1552	murB	murB
rxn02286	UDP-N-acetylmuramate--L-alanine ligase	cpd00773_c0 (1) + cpd00002_c0 (1) + cpd00035_c0 (1) ==> cpd00890_c0 (1) + cpd00067_c0 (1) + cpd00009_c0 (1) + cpd00008_c0 (1)	UDP_MurNAc_c0 (1) + ATP_c0 (1) + L_Alanine_c0 (1) ==> UDP_N_acetylmuramoyl_L_alanine_c0 (1) + H_c0 (1) + Phosphate_c0 (1) + ADP_c0 (1)	FALSE	R03193	6.3.2.8	smc01867	MurC	Experimental	This study			Smed_2081	murC	murC	murC	murC	murC	murC	mll1553	murC	murC
rxn02008	UDP-N-acetylmuramoyl-L-alanyl-D-glutamate synthetase	cpd00890_c0 (1) + cpd00186_c0 (1) + cpd00002_c0 (1) ==> cpd00067_c0 (1) + cpd00009_c0 (1) + cpd00525_c0 (1) + cpd00008_c0 (1)	UDP_N_acetylmuramoyl_L_alanine_c0 (1) + D_Glutamate_c0 (1) + ATP_c0 (1) ==> H_c0 (1) + Phosphate_c0 (1) + UDP_N_acetylmuramoyl_L_alanyl_D_glutamate_c0 (1) + ADP_c0 (1)	FALSE	R02783	6.3.2.9	smc01864	MurD	Experimental	Cowie et al 2006; This study			Smed_2084	murD	murD	murD	murD	murD	murD	mll1557	murD	murD
rxn02011	UDP-N-acetylmuramoylalanyl-D-glutamate--2_6-diaminopimelate ligase	cpd00002_c0 (1) + cpd00525_c0 (1) + cpd00516_c0 (1) ==> cpd00067_c0 (1) + cpd00009_c0 (1) + cpd02964_c0 (1) + cpd00008_c0 (1)	ATP_c0 (1) + UDP_N_acetylmuramoyl_L_alanyl_D_glutamate_c0 (1) + meso_2_6_Diaminopimelate_c0 (1) ==> H_c0 (1) + Phosphate_c0 (1) + UDP_N_acetylmuramoyl_L_alanyl_D_gamma_glutamyl_meso_2_6_diaminopimelate_c0 (1) + ADP_c0 (1)	FALSE	R02788	6.3.2.13	smc01861	MurE	Experimental but incomplete	This study	This Tn-seq data was consistent with MurE having the annotated function. However, it appeared as though mutations of murE were not absolutely lethal, suggesting there may be a low rate of bypass of this enzyme possibly as a non-specific activity of another protein.		Smed_2087	murE	murE	murE	murE	murE	RL73_03660	mll1560	murE	murE
rxn00851	D-alanine--D-alanine ligase	cpd00002_c0 (1) + cpd00117_c0 (2) ==> cpd00067_c0 (1) + cpd00009_c0 (1) + cpd00731_c0 (1) + cpd00008_c0 (1)	ATP_c0 (1) + D_Alanine_c0 (2) ==> H_c0 (1) + Phosphate_c0 (1) + Ala_Ala_c0 (1) + ADP_c0 (1)	FALSE	R01150	6.3.2.4	smc01871	Ddl	Experimental	This study			Smed_2077	ddlB	noHit	ddlB	ddlB	ddlB	RL73_03090	mll1551	DK53_1395	ddlA
rxn03164	UDP-N-acetylmuramoylalanyl-D-glutamyl-2_6-diaminopimelate--D-alanyl-D-alanine ligase	cpd00002_c0 (1) + cpd02964_c0 (1) + cpd00731_c0 (1) ==> cpd00067_c0 (1) + cpd00009_c0 (1) + cpd00008_c0 (1) + cpd02968_c0 (1)	ATP_c0 (1) + UDP_N_acetylmuramoyl_L_alanyl_D_gamma_glutamyl_meso_2_6_diaminopimelate_c0 (1) + Ala_Ala_c0 (1) ==> H_c0 (1) + Phosphate_c0 (1) + ADP_c0 (1) + UDP_N_acetylmuramoyl_L_alanyl_D_glutamyl_6_carboxy_L_lysyl_D_alanyl__D_alanine_c0 (1)	FALSE	R04617	6.3.2.10	smc01862	MurF	Experimental	This study			Smed_2086	murF	murF	murF	murF	murF	RL73_03655	mll1559	murF	bll6606
rxn09345	Undecaprenyl-diphosphate synthase	cpd00113_c0 (8) + cpd00350_c0 ==> cpd02229_c0 (1) + cpd00012_c0 (8)	Isopentenyldiphosphate_c0 (8) + Farnesyldiphosphate_c0 ==> Bactoprenyl_diphosphate_c0 (1) + PPi_c0 (8)	FALSE	R06447	2.5.1.31	smc02097	UppS	Experimental	This study			Smed_1135	lpxD	lpxD	uppS	uppS	uppS	RL73_00400	mll0640	uppS	uppS
rxn03901	Undecaprenyl diphosphate phosphohydrolase	cpd02229_c0 (1) + cpd00001_c0 (1) ==> cpd00067_c0 (1) + cpd00009_c0 (1) + cpd00286_c0 (1)	Bactoprenyl_diphosphate_c0 (1) + H2O_c0 (1) ==> H_c0 (1) + Phosphate_c0 (1) + Undecaprenylphosphate_c0 (1)	FALSE	R05627	3.6.1.27	smc00408	UppP	Experimental	This study			Smed_3536	NGR_c36660	OV14_1219	RL0328	upk	bacA	RL73_05805	mll4634	uppP	blr0716
rxn03904	Phospho-N-acetylmuramoyl-pentapeptide-transferase	cpd02968_c0 (1) + cpd00286_c0 (1) <==> cpd03494_c0 (1) + cpd00091_c0 (1)	UDP_N_acetylmuramoyl_L_alanyl_D_glutamyl_6_carboxy_L_lysyl_D_alanyl__D_alanine_c0 (1) + Undecaprenylphosphate_c0 (1) <==> Undecaprenyl_diphospho_N_acetylmuramoyl_L_alanyl_D_glutamyl_meso_2_6_diaminopimeloyl_D_alanyl_D_alanine_c0 (1) + UMP_c0 (1)	TRUE	R05630	2.7.8.13	smc01863	MraY	Experimental	This study			Smed_2085	mraY	mraY	mraY	mraY	mraY	mraY	mll1558	mraY	mraY
rxn03408	UDP-diphospho-muramoylpentapeptide beta-N-acetylglucosaminyltransferase	cpd03494_c0 (1) + cpd00037_c0 (1) <==> cpd00014_c0 (1) + cpd03495_c0 (1)	Undecaprenyl_diphospho_N_acetylmuramoyl_L_alanyl_D_glutamyl_meso_2_6_diaminopimeloyl_D_alanyl_D_alanine_c0 (1) + UDP_N_acetylglucosamine_c0 (1) <==> UDP_c0 (1) + Undecaprenyl_diphospho_N_acetylmuramoyl__N_acetylglucosamine_L_ala_D_glu_meso_2_6_diaminopimeloyl_D_ala_D_ala_c0 (1)	TRUE	R05032	2.4.1.227	smc01866	MurG	Experimental	This study			Smed_2082	murG	murG	murG	murG	murG	RL73_03635	mll1554	murG	murG
rxn10199	Peptidoglycan subunit flippase and addition	cpd15666_c0 (1) + cpd03495_c0 (1) <==> cpd02229_c0 (1) + cpd15665_c0 (1)	Peptidoglycan_polymer_n_1_subunits_c0 (1) + Undecaprenyl_diphospho_N_acetylmuramoyl__N_acetylglucosamine_L_ala_D_glu_meso_2_6_diaminopimeloyl_D_ala_D_ala_c0 (1) <==> Bactoprenyl_diphosphate_c0 (1) + Peptidoglycan_polymer_n_subunits_c0 (1)	TRUE			(smc01334 and smc01123)	(MrcA1 and MviN)	Experimental	Rudnick et al 2001; This study			(Smed_0960 and Smed_0032)	(NGR_c11150 and mviN)	(OV14_2382 and mviN)	(RL1743 and mviN)	(mrcA and mviN)	(mrcA and mviN)	(RL73_00545 and RL73_00295)	(mlr0215 and mll5320)	(DK53_907 and mviN)	(mrcA and bll5916)
Lipopolysaccharide biosynthesis
rxn06729	UDP-N-acetylglucosamine acyltransferase	cpd11484_c0 (1) + cpd00037_c0 (1) ==> cpd11493_c0 (1) + cpd02886_c0 (1)	HMA_c0 (1) + UDP_N_acetylglucosamine_c0 (1) ==> ACP_c0 (1) + UDP_3_O_beta_hydroxymyristoyl_N_acetylglucosamine_c0 (1)	FALSE	R04567	2.3.1.129	smc02091	LpxA	Experimental	This study			Smed_1141	lpxA	lpxA	lpxA	lpxA	lpxA	RL73_00430	mll0633	lpxA	lpxA
rxn03146	UDP-3-O-[3-hydroxymyristoyl] N-acetylglucosamine deacetylase	cpd00001_c0 (1) + cpd02886_c0 (1) <==> cpd03584_c0 (1) + cpd00029_c0 (1)	H2O_c0 (1) + UDP_3_O_beta_hydroxymyristoyl_N_acetylglucosamine_c0 (1) <==> UDP_3_O_beta_hydroxymyristoyl_D_glucosamine_c0 (1) + Acetate_c0 (1)	TRUE	R04587	3.5.1.108	smc01875	LpxC	Experimental	This study			Smed_2073	lpxC	lpxC	lpxC	lpxC	lpxC	noHit	mll1545	lpxC	lpxC
rxn06723	UDP-3-O-[3-hydroxymyristoyl] glucosamine N-acyltransferase	cpd11484_c0 (1) + cpd03584_c0 (1) ==> cpd11493_c0 (1) + cpd00067_c0 (1) + cpd02835_c0 (1)	HMA_c0 (1) + UDP_3_O_beta_hydroxymyristoyl_D_glucosamine_c0 (1) ==> ACP_c0 (1) + H_c0 (1) + UDP_2_3_bis3_hydroxytetradecanoylglucosamine_c0 (1)	FALSE	R04550	2.3.1.191	smc02093	LpxD	Experimental	This study			Smed_1139	NGR_c13420	OV14_2584	lpxD	lpxD	lpxD	RL73_00420	mll0635	lpxD	lpxD
rxn03130	UDP-2_3-diacylglucosamine pyrophosphatase	cpd00001_c0 (1) + cpd02835_c0 (1) ==> cpd00091_c0 (1) + cpd02930_c0 (1)	H2O_c0 (1) + UDP_2_3_bis3_hydroxytetradecanoylglucosamine_c0 (1) ==> UMP_c0 (1) + Lipid_X_c0 (1)	FALSE			smc02090	LpxI	Experimental	This study	The gene smc02090 was annotated as a conserved hypothetical protein, but is located in a locus containing lipopolysaccharide bioxynthetic genes. It also appeared essential in this Tn-seq data. Therefore we have reannotated this gene as lpxI, whose product replaces the function of the LpxH protein of E. coli based on previous work with C. crescentus (Metzger and Raetz 2010).		Smed_1142	NGR_c13450	OV14_2587	RL2232	RHE_CH01924	Atu1385	RL73_00435	mll0631	DK53_1138	bll4848
rxn03159	Lipid-A-disaccharide synthase	cpd02930_c0 (1) + cpd02835_c0 (1) <==> cpd00014_c0 (1) + cpd03002_c0 (1)	Lipid_X_c0 (1) + UDP_2_3_bis3_hydroxytetradecanoylglucosamine_c0 (1) <==> UDP_c0 (1) + Lipid_A_disaccharide_c0 (1)	TRUE	R04606	2.4.1.182	smc02089	LpxB	Experimental	Cowie et al 2006; This study			Smed_1143	lpxB	lpxB	lpxB	lpxB	lpxB	RL73_00440	mll0630	lpxB	lpxB
rxn03181	Tetraacyldisaccharide 4'-kinase	cpd00002_c0 (1) + cpd03002_c0 (1) <==> cpd02993_c0 (1) + cpd00008_c0 (1)	ATP_c0 (1) + Lipid_A_disaccharide_c0 (1) <==> Lipid_IVA_c0 (1) + ADP_c0 (1)	TRUE	R04657	2.7.1.130	smc00892	LpxK	Experimental	This study			Smed_0426	lpxK	lpxK	lpxK	lpxK	lpxK	RL73_01340	mlr8270	lpxK	lpxK
rxn03182	3-deoxy-D-manno-octulosonic-acid transferase	cpd02993_c0 (1) + cpd02546_c0 (1) ==> cpd03585_c0 (1) + cpd00046_c0 (1)	Lipid_IVA_c0 (1) + CMP_KDO_c0 (1) ==> KDO_lipid_IVA_c0 (1) + CMP_c0 (1)	FALSE	R04658	2.4.99.12	smc00894	KdtA	Experimental	This study			Smed_0424	kdtA	kdtA	RL0902	kdtA	kdtA	RL73_01330	mlr8269	DK53_2930	kdtA
rxn03439	3-deoxy-D-manno-octulosonic-acid transferase	cpd03585_c0 (1) + cpd02546_c0 (1) ==> cpd03586_c0 (1) + cpd00046_c0 (1)	KDO_lipid_IVA_c0 (1) + CMP_KDO_c0 (1) ==> kdo2_lipid_iva_c0 (1) + CMP_c0 (1)	FALSE	R05074	2.4.99.13	smc00894	KdtA	Experimental	This study			Smed_0424	kdtA	kdtA	RL0902	kdtA	kdtA	RL73_01330	mlr8269	DK53_2930	kdtA
rxnVLCFA52	VLFCA transferase	cpdVLCFA_c0 (1) + cpd03586_c0 (1) ==> cpd11493_c0 (1) + cpdLipidA_c0 (1)	3_Hydroxy_C28_ACPXL_c0 (1) + kdo2_lipid_iva_c0 (1) ==> ACP_c0 (1) + VLCFA_KDO2_lipid_A_c0 (1)	FALSE		2.3.1.-	smc04268	LpxXL	Experimental	Ferguson et al 2005; This study			Smed_1736	NGR_c18030	OV14_3170	RL2812	msbB	msbB	RL73_04910	mlr1179	DK53_847	msbB
rxnLPS1	Glucose transferase to KDO2-lipid A	cpdLipidA_c0 (1) + cpd00026_c0 (1) ==> cpd00014_c0 (1) + cpdLipAg_c0 (1)	VLCFA_KDO2_lipid_A_c0 (1) + UDP_glucose_c0 (1) ==> UDP_c0 (1) + Glucose_VLCFA_KDO2_lipid_A_c0 (1)	FALSE			smc01219	LpsB	Experimental but incomplete	Clover et al 1989; Lagares et al 1992; Niehaus et al 1998; Lagares et al 2001; Campbell et al 2002; Campbell et al 2003; Kanipes et al 2003; This study	The structure of the core oligosaccharide of S. meliloti does not appear to have been characterized, but its composition has been (Campbell et al 2002). However, there is evidence that the first sugar added is a glucose (Kanipes et al 2003) and that this is mediated by LpsB. Therefore, there is one reaction adding glucose, and then another reaction that adds all the other sugars in the determined…		Smed_1253	lpsB	lpsB	lpcC	lpcC	lpcC	RL73_00825	noHit	DK53_1464	lpcC
Demand_cpdLPS3	Demand cpdLPS3	cpdLPS3_c0 (1) <==> cpdLPS3_b (1)	deoxyheptulosaric acid_c0 (1) <==> deoxyheptulosaric acid_b (1)	TRUE							As we were unsure how to synthesize this compound present in the core oligosaccharide, we have added it as a demand compound.
rxnLPS2	Addition of the rest of the core oligosaccharide to lipid A	cpdLipAg_c0 (1) + cpd00163_c0 (0.05) + cpd00083_c0 (0.53) + cpd00043_c0 (0.38) + cpd00026_c0 (2.35) + cpd00144_c0 (1.08) + cpd00472_c0 (2.12) + cpdLPS3_c0 (0.36) + cpd02546_c0 (0.12) ==> cpdLipAco_c0 (1) + cpd00014_c0 (5.98) + cpd00031_c0 (0.53) + cpd00046_c0 (0.12)	Glucose_VLCFA_KDO2_lipid_A_c0 (1) + UDP-xylose_c0 (0.05) + GDP_mannose_c0 (0.53) + UDP_galactose_c0 (0.38) + UDP_glucose_c0 (2.35) + UDPglucuronate_c0 (1.08) + UDP-galacturonic acid_c0 (2.12) + deoxyheptulosaric acid_c0 (0.36) + CMP_KDO_c0 (0.12) ==> Lipid A + core oligosaccharide_c0 (1) + UDP_c0 (5.98) + GDP_c0 (0.53) + CMP_c0 (0.12)	FALSE			(smc01222 and smc01221 and smc01220 and smc01219)	(LpsC and LpsD and LpsE and LpsB)	Experimental but incomplete	Clover et al 1989; Lagares et al 1992; Niehaus et al 1998; Lagares et al 2001; Campbell et al 2002; Campbell et al 2003; Kanipes et al 2003; This study	The structure of the core oligosaccharide of S. meliloti does not appear to have been characterized, but its composition has been (Campbell et al 2002). However, there is evidence that the first sugar added is a glucose (Kanipes et al 2003) and that this is mediated by LpsB. Therefore, there is one reaction adding glucose, and then another reaction that adds all the other sugars in the determined…		(Smed_1250 and Smed_1251 and Smed_1252 and Smed_1253)	(lpsC and lpsD and lpsE and lpsB)	(lpsC and lpsD and lpsE and lpsB)	(noHit and noHit and noHit and lpcC)	(noHit and noHit and noHit and lpcC)	(noHit and noHit and noHit and lpcC)	(noHit and noHit and noHit and RL73_00825)	(mlr2557 and noHit and noHit and noHit)	(noHit and noHit and noHit and DK53_1464)	(noHit and noHit and noHit and lpcC)
rxnLPS3	Addition of the O-antigen to LPS	cpdLipAco_c0 (1) + cpd00472_c0 (3) + cpd00163_c0 (3) + cpd02113_c0 (3) ==> cpdLPS_c0 (1) + cpd00014_c0 (6) + cpd00297_c0 (3)	Lipid A + core oligosaccharide_c0 (1) + UDP-galacturonic acid_c0 (3) + UDP-xylose_c0 (3) + dTDP_rhamnose_c0 (3) ==> Complete LPS_c0 (1) + UDP_c0 (6) + dTDP_c0 (3)	FALSE			UnknownC	UnknownC			To the best of our knowledge, the genetics of O-antigen bisynthesis in S. meliloti has not been studied. Indeed, Sharypova et al (2003) stated "Consequently, not a single gene was assigned to a function in O antigen biosynthesis." Therefore, an unknown has been added for this reaction.		UnknownC	UnknownC	UnknownC	UnknownC	UnknownC	UnknownC	UnknownC	UnknownC	UnknownC	UnknownC
Succinoglycan biosynthesis
rxn01119	UDP-galactose:undecaprenyl-phosphate galactose phosphotransferase	cpd00043_c0 (1) + cpd00286_c0 (1) <==> cpd00091_c0 (1) + cpd02745_c0 (1)	UDP_galactose_c0 (1) + Undecaprenylphosphate_c0 (1) <==> UMP_c0 (1) + alpha-D-Galactosyl-diphosphoundecaprenol (1)	TRUE	R01535	2.7.8.6	smb20946	ExoY	Experimental	Reuber and Walker 1993; Müller et al 1993			Smed_4946	exoY2	exoY2	noHit	exoY	exoY	noHit	mll5252	noHit	noHit
rxnEPSS1	EPSI Glucosyltransferase 1	cpd02745_c0 (1) + cpd00026_c0 (1) <==> cpdEPSi2_c0 (1) + cpd00014_c0 (1)	alpha-D-Galactosyl-diphosphoundecaprenol (1) + UDP_glucose_c0 (1) <==> EPSI intermediate - 1 galactose 1 glucose (1) + UDP_c0 (1)	TRUE			smb20957	ExoA	Experimental	Reuber and Walker 1993; Long et al 1988; Becker et al 1993b; Finan et al 1985; Leigh et al 1985			Smed_4957	exoA	exoA	noHit	noHit	exoA	noHit	mlr5272	noHit	noHit
rxnEPSS2	EPSI Glucosyltransferase 2	cpdEPSi2_c0 (1) + cpd00026_c0 (1) <==> cpdEPSi3_c0 (1) + cpd00014_c0 (1)	EPSI intermediate - 1 galactose 1 glucose (1) + UDP_glucose_c0 (1) <==> EPSI intermediate - 1 galactose 2 glucose (1) + UDP_c0 (1)	TRUE			smb20956	ExoL	Experimental	Reuber and Walker 1993; Becker et al 1993a; Long et al 1988			Smed_4956	exoL	exoL	noHit	noHit	exoL	noHit	mlr5271	noHit	noHit
rxnEPSS3	EPS1 Acetyltransferase	cpdEPSi3_c0 (1) + cpd00022_c0 (1) <==> cpdEPSi4_c0 (1) + cpd00010_c0 (1)	EPSI intermediate - 1 galactose 2 glucose (1) + Acetyl_CoA_c0 (1) <==> EPSI intermediate - 1 galactose 2 glucose 1 acetyl (1) + CoA_c0 (1)	TRUE			smb20943	ExoZ	Experimental	Buendia et al 1991; Reuber and Walker 1993			Smed_4943	exoZ1	exoZ1	exoZ	exoZ	Atu2358	noHit	mlr6758	noHit	exoZ
rxnEPSS4	EPSI Glucosyltransferase 3	cpdEPSi4_c0 (1) + cpd00026_c0 (1) <==> cpdEPSi5_c0 (1) + cpd00014_c0 (1)	EPSI intermediate - 1 galactose 2 glucose 1 acetyl (1) + UDP_glucose_c0 (1) <==> EPSI intermediate - 1 galactose 3 glucose 1 acetyl (1) + UDP_c0 (1)	TRUE			smb20958	ExoM	Experimental	Reuber and Walker 1993; Long et al 1988; Becker et al 1993b			Smed_4958	exoM	exoM	noHit	pssC	exoM	noHit	mlr5273	noHit	noHit
rxnEPSS5	EPSI Glucosyltransferase 4	cpdEPSi5_c0 (1) + cpd00026_c0 (1) <==> cpdEPSi6_c0 (1) + cpd00014_c0 (1)	EPSI intermediate - 1 galactose 3 glucose 1 acetyl (1) + UDP_glucose_c0 (1) <==> EPSI intermediate - 1 galactose 4 glucose 1 acetyl (1) + UDP_c0 (1)	TRUE			smb20959	ExoO	Experimental	Reuber and Walker 1993; Becker et al 1993b			Smed_4959	exoO	exoO	noHit	noHit	exoO	noHit	mlr5274	noHit	noHit
rxnEPSS6	EPSI Glucosyltransferase 5	cpdEPSi6_c0 (1) + cpd00026_c0 (1) <==> cpdEPSi7_c0 (1) + cpd00014_c0 (1)	EPSI intermediate - 1 galactose 4 glucose 1 acetyl (1) + UDP_glucose_c0 (1) <==> EPSI intermediate - 1 galactose 5 glucose 1 acetyl (1) + UDP_c0 (1)	TRUE			smb20948	ExoU	Experimental	Reuber and Walker 1993; Becker et al 1993c			Smed_4948	exoU1	exoU1	noHit	noHit	exoU	noHit	mlr5261	noHit	noHit
rxnEPSS7	EPSI Glucosyltransferase 6	cpdEPSi7_c0 (1) + cpd00026_c0 (1) <==> cpdEPSi8_c0 (1) + cpd00014_c0 (1)	EPSI intermediate - 1 galactose 5 glucose 1 acetyl (1) + UDP_glucose_c0 (1) <==> EPSI intermediate - 1 galactose 6 glucose 1 acetyl (1) + UDP_c0 (1)	TRUE			smb21690	ExoW	Experimental	Reuber and Walker 1993; Becker et al 1993c			Smed_4950	noHit	noHit	noHit	noHit	exoW	noHit	noHit	noHit	noHit
rxnEPSS8	EPS1 Succinyltransferase 1	cpdEPSi8_c0 (1) + cpd00078_c0 (1) <==> cpdEPSi9_c0 (1) + cpd00010_c0 (1)	EPSI intermediate - 1 galactose 6 glucose 1 acetyl (1) + Succinyl_CoA_c0 (1) <==> EPSI intermediate - 1 galactose 6 glucose 1 acetyl 1 succinyl (1) + CoA_c0 (1)	TRUE			smb20954	ExoH	Experimental	Long et al 1988; Becker et al 1993a; Leigh et al 1985			Smed_4954	noHit	OV14_a0701	noHit	noHit	exoH	noHit	noHit	noHit	noHit
rxnEPSS9	EPSI Glucosyltransferase 7	cpdEPSi9_c0 (1) + cpd00026_c0 (1) <==> cpdEPSi10_c0 (1) + cpd00014_c0 (1)	EPSI intermediate - 1 galactose 6 glucose 1 acetyl 1 succinyl (1) + UDP_glucose_c0 (1) <==> EPSI intermediate - 1 galactose 7 glucose 1 acetyl 1 succinyl (1) + UDP_c0 (1)	TRUE			Unknown	Unknown			To the best of our knowledge, the protein catalyzing this step remains unknown.		Unknown	Unknown	Unknown	Unknown	Unknown	Unknown	Unknown	Unknown	Unknown	Unknown
rxnEPSS10	EPS1 Pyruvyltransferase	cpdEPSi10_c0 (1) + cpd00061_c0 (1) + cpd00001_c0 (1) <==> cpdEPSi11_c0 (1) + cpd00009_c0 (1) + cpd00067_c0 (1)	EPSI intermediate - 1 galactose 7 glucose 1 acetyl 1 succinyl (1) + Phosphoenolpyruvate_c0 (1) + H2O_c0 (1) <==> EPSI intermediate - 1 galactose 7 glucose 1 acetyl 1 succinyl 1 pyruvate (1) + Phosphate_c0 (1) + H_c0 (1)	TRUE			smb20949	ExoV	Experimental	Reuber and Walker 1993; Becker et al 1993c			Smed_4949	noHit	noHit	pssM	pssM	exoV	noHit	noHit	noHit	noHit
rxnEPSSlmw	LMW Succinoglycan biosynthesis	cpdEPSi11_c0 (1) + cpdEPSLn1_c0 (1) ==> cpdEPSLn_c0 (1) + cpd02229_c0 (1)	EPSI intermediate - 1 galactose 7 glucose 1 acetyl 1 succinyl 1 pyruvate (1) + n-1 subunits low molecular weight succinoglycan (1) ==> n subunits low molecular weight succinoglycan (1) + Bactoprenyl_diphosphate_c0 (1)	FALSE			(smb20961 and smb20950)	(ExoP and ExoT)	Experimental	Glucksmann et al 1993; Gonzalez et al 1998; Long et al 1988; Becker et al 1993c			(Smed_4961 and Smed_4951)	(exoP and noHit)	(exoP and OV14_a0700)	(PssP and noHit)	(pssP and noHit)	(exoP and exoT)	(noHit and noHit)	(mlr5276 and noHit)	(noHit and noHit)	(bll2362 and noHit)
rxnEPSShmw	HMW Succinoglycan biosynthesis	cpdEPSi11_c0 (1) + cpdEPSHn1_c0 (1) ==> cpdEPSHn_c0 (1) + cpd02229_c0 (1)	EPSI intermediate - 1 galactose 7 glucose 1 acetyl 1 succinyl 1 pyruvate (1) + n-1 subunits high molecular weight succinoglycan (1) ==> n subunits high molecular weight succinoglycan (1) + Bactoprenyl_diphosphate_c0 (1)	FALSE			(smb20961 and smb20944 and (smb20941 or NonEssential))	(ExoP and ExoQ and (ExsA or NonEssential))	Experimental	Glucksmann et al 1993; Gonzalez et al 1998; Long et al 1988; Becker et al 1993b; Becker et al 1995			(Smed_4961 and Smed_4944 and (Smed_4941 or NonEssential))	(exoP and exoQ and (exsA or NonEssential))	(exoP and exoQ and (exsA or NonEssential))	(PssP and noHit and (pRL110060 or NonEssential))	(pssP and noHit and (RHE_CH02028 or NonEssential))	(exoP and exoQ and (exsA or NonEssential))	(noHit and noHit and (noHit or NonEssential))	(mlr5276 and mlr5249 and (mll0815 or NonEssential))	(noHit and noHit and (noHit or NonEssential))	(bll2362 and noHit and (bll6620 or NonEssential))
rxnEPSSlmw2	HMW Succinoglycan cleavage	cpdEPSHn_c0 (1) + cpdEPSLn1_c0 (1) ==> cpdEPSHn1_c0 (1) + cpdEPSLn_c0 (1)	n subunits high molecular weight succinoglycan (1) + n-1 subunits low molecular weight succinoglycan (1) ==> n-1 subunits high molecular weight succinoglycan (1) + n subunits low molecular weight succinoglycan (1)	FALSE			(smb20955 or (smb20932 and smb21466 and smb21465))	(ExoK or (ExsH and PrsD and PrsE)	Experimental	Glucksmann et al 1993; Reuber and Walker 1993; Becker et al 1993a; York and Walker 1997; York and Walker 1998			(Smed_4955 or (Smed_4931 and Smed_4390 and Smed_4391))	(exoZ2 or (exsH and aprD and aprE))	(exoZ2 or (exsH and aprD and noHit))	(noHit or (noHit and prsD and prsE))	(noHit or (noHit and prsD and prsE))	(exoK or (exsH and rspD and prsE2))	(noHit or (noHit and noHit and noHit))	(mlr5264 or (mll2585 and noHit and noHit))	(noHit or (noHit and noHit and noHit))	(noHit or (noHit and bll7914 and noHit))
Nucleotide-sugar biosynthesis
rxn00704	Glucose-1-phosphate phosphomutase	cpd00089_c0 (1) <==> cpd00079_c0 (1)	Glucose_1_phosphate_c0 (1) <==> D_glucose_6_phosphate_c0 (1)	TRUE	R00959	5.4.2.2	smc03925	Pgm	Experimental	Leigh et al 1985; Miller-Williams et al 2006; This study			Smed_2743	NGR_c28980	OV14_0351	pgm	pgm	exoC	RL73_03460	mlr7590	pgm	noHit
rxn00213	UTP--glucose-1-phosphate uridylyltransferase	cpd00089_c0 (1) + cpd00062_c0 (1) <==> cpd00026_c0 (1) + cpd00012_c0 (1)	Glucose_1_phosphate_c0 (1) + UTP_c0 (1) <==> UDP_glucose_c0 (1) + PPi_c0 (1)	TRUE	R00289	2.7.7.9	(smc04023 or smb20960)	(ExoN2 or ExoN)	Experimental	Becker et al 1993b; This study	The chromosomal exoN2 gene was only essential in this Tn-seq study when pSymA and pSymB were absent. This is consistent with ExoN2 having the annotated function, and with a second copy on pSymA or pSymB. This would be the exoN gene, which has some experimental evidence for its activity (Becker et al 1993b)		(Smed_2707 or Smed_4960)	(exoN or NGR_b18390)	(exoN or OV14_a0707)	(exoN or noHit)	(exoN or noHit)	(galU or exoN)	(RL73_01250 or noHit)	(mll3025 or mlr5275)	(galU or noHit)	(exoN or noHit)
rxn00214	UDP-glucose 4-epimerase	cpd00026_c0 (1) <==> cpd00043_c0 (1)	UDP_glucose_c0 (1) <==> UDP_galactose_c0 (1)	TRUE	R00291	5.1.3.2	smb20942	ExoB	Experimental	Buendia et al 1991			Smed_4942	NGR_b18230	OV14_a0691	exoB	galE3	galE/exoB	RL73_01790	noHit	galE	noHit
rxn00211	UDP-glucose 6-dehydrogenase	cpd00001_c0 (1) + cpd00026_c0 (1) + cpd00003_c0 (2) <==> cpd00067_c0 (3) + cpd00004_c0 (2) + cpd00144_c0 (1)	H2O_c0 (1) + UDP_glucose_c0 (1) + NAD_c0 (2) <==> H_c0 (3) + NADH_c0 (2) + UDPglucuronate_c0 (1)	TRUE	R00286	1.1.1.22	smc02641	RkpK	Experimental	Kereszt et al 1998			Smed_0688	ugdH	ugdH	rkpK	rkpK	ugdH	noHit	mlr5265	DK53_2665	ugdH
rxn01008	UDP-glucuronate 4-epimerase	cpd00144_c0 (1) <==> cpd00472_c0 (1)	UDPglucuronate_c0 (1) <==> UDP-galacturonic acid_c0 (1)	TRUE	R01385	5.1.3.6	smc02640	LpsL	Experimental	Keating et al 2002; This study			Smed_0689	NGR_c08380	OV14_2101	lspL	lpsL	lspL	noHit	mlr7549	noHit	lspL
rxn01007	UDP-xylose synthase	cpd00067_c0 (1) + cpd00144_c0 (1) <==> cpd00011_c0 (1) + cpd00163_c0 (1)	H_c0 (1) + UDPglucuronate_c0 (1) <==> CO2_c0 (1) + UDP-xylose_c0 (1)	TRUE	R01384	4.1.1.35	smb20458	Uxs	Experimental but incomplete	Gu et al 2011	Uxs was experimentally shown to have this activity. However, it was not tested if this I the only enzyme in S. meliloti to have this function.		Smed_3673	NGR_b17850	OV14_0476	RL0560	RHE_CH01360	Atu3316	noHit	mll7879	DK53_2668	blr6004
rxn01117	Arabinose-5-phosphate isomerase	cpd00817_c0 (1) <==> cpd00171_c0 (1)	D_Arabinose5_phosphate_c0 (1) <==> D_Ribulose5_phosphate_c0 (1)	TRUE	R01530	5.3.1.13	(smc02268 or smb20830 or smb20809)	(KpsF3 or KpsF2 or KpsF1)	Experimental but incomplete	This study	In this Tn-seq data, kpsF3 was only essential when pSymA and pSymB was removed. This is consistent with KpsF3 having the annotated function, with at least one additional copy encoded by pSymA or pSymB, with KpsF2 and KpsF1 being the best candidates.		(Smed_0192 or noHit or Smed_5015)	(kpsF or noHit or noHit)	(kpsF or noHit or noHit)	(noHit or kdsD or noHit)	(noHit or kpsF or noHit)	(noHit or kpsF or noHit)	(noHit or RL73_03005 or noHit)	(noHit or mll3023 or noHit)	(noHit or DK53_3061 or noHit)	(noHit or noHit or blr7746)
rxn02331	2-dehydro-3-deoxyphosphooctonate aldolase	cpd00001_c0 (1) + cpd00061_c0 (1) + cpd00817_c0 (1) ==> cpd00067_c0 (1) + cpd00009_c0 (1) + cpd02730_c0 (1)	H2O_c0 (1) + Phosphoenolpyruvate_c0 (1) + D_Arabinose5_phosphate_c0 (1) ==> H_c0 (1) + Phosphate_c0 (1) + 3_Deoxy_D_manno_octulosonate8_phosphate_c0 (1)	FALSE	R03254	2.5.1.55	smc01027	KdsA	Experimental	This study			Smed_1071	NGR_c12790	OV14_2515	kdsA	kdsA	kdsA	RL73_05570	mlr0374	kdsA	kdsA
rxn02404	3-deoxy-manno-octulosonate-8-phosphatase	cpd00001_c0 (1) + cpd02730_c0 (1) ==> cpd00067_c0 (1) + cpd00009_c0 (1) + cpd00875_c0 (1)	H2O_c0 (1) + 3_Deoxy_D_manno_octulosonate8_phosphate_c0 (1) ==> H_c0 (1) + Phosphate_c0 (1) + KDO_c0 (1)	FALSE	R03350	3.1.3.45	(smc01026 or UnknownC)	(Smc01026 or UnknownC)	Predicted		The enzyme catalyzing this reaction has not been identified in S. meliloti. We have put Smc01026 here as a prediction based on co-occurance with the kdsA gene in S. meliloti (likely an operon) and in other organisms (see the STRING database). However, the gene did not appear to be essential in this Tn-seq data, and thus if this protein does have this function, there must be another protein able t…		(Smed_1070 or UnknownC)	(NGR_c12780 or UnknownC)	(OV14_2514 or UnknownC)	(RL2237 or UnknownC)	(RHE_CH01929 or UnknownC)	(Atu1423 or UnknownC)	(noHit or UnknownC)	(mlr0372 or UnknownC)	(noHit or UnknownC)	(noHit or UnknownC)
rxn02405	3-deoxy-manno-octulosonate cytidylyltransferase	cpd00875_c0 (1) + cpd00052_c0 (1) ==> cpd00012_c0 (1) + cpd02546_c0 (1)	KDO_c0 (1) + CTP_c0 (1) ==> PPi_c0 (1) + CMP_KDO_c0 (1)	FALSE	R03351	2.7.7.38	smc02898	KdsB	Experimental	This study			Smed_3427	kdsB	kdsB	kdsB	kdsB1	kdsB	RL73_00455	mlr5497	kdsB	kdsB
rxn01675	Glucose-1-phosphate thymidylyltransferase	cpd00357_c0 (1) + cpd00089_c0 (1) <==> cpd00626_c0 (1) + cpd00012_c0 (1)	dTTP_c0 (1) + Glucose_1_phosphate_c0 (1) <==> dTDPglucose_c0 (1) + PPi_c0 (1)	TRUE	R02328	2.7.7.33	smb21324	WgaG	Predicted	Becker et al 1997			Smed_4721	rmlA	noHit	rmlA	RHE_CH01512	rfbA	RL73_05075	mlr7550	noHit	noHit
rxn01997	dTDP-glucose 4_6-dehydratase	cpd00626_c0 (1) ==> cpd00521_c0 (1) + cpd00001_c0 (1)	dTDPglucose_c0 (1) ==> dTDP_4_oxo_6_deoxy_D_glucose_c0 (1) + H2O_c0 (1)	FALSE	R06513	4.2.1.46	(smb21326 or smb20239 or smb21052 or smb21426 or smb20458)	(WgaI or RmlB or Smb21052 or Smb21426 or Smb20458)	Predicted	Becker et al 1997			(Smed_4723 or Smed_3893 or noHit or noHit or Smed_3673)	(rmlB or noHit or noHit or NGR_c24380 or NGR_b17850)	(noHit or noHit or noHit or OV14_3955 or OV14_0476)	(rffG or noHit or noHit or noHit or RL0560)	(rffB or rmlB or noHit or noHit or RHE_CH01360)	(rffB or noHit or noHit or noHit or Atu3316)	(noHit or noHit or noHit or noHit or noHit)	(mlr7552 or noHit or noHit or mll7572 or mll7879)	(noHit or noHit or noHit or noHit or DK53_2668)	(blr5989 or noHit or noHit or noHit or blr6004)
rxn02000	dTDP-4-dehydrorhamnose 3_5-epimerase	cpd00521_c0 (1) <==> cpd00522_c0 (1)	dTDP_4_oxo_6_deoxy_D_glucose_c0 (1) <==> dTDP_4_oxo_L_rhamnose_c0 (1)	TRUE	R06514	5.1.3.13	(smb21325 or smb21428)	(WgaH or RmlC)	Predicted	Becker et al 1997			(Smed_4722 or noHit)	(rmlC or rmlC)	(noHit or rmlC)	(rmlC or noHit)	(RHE_CH01515 or noHit)	(rfbC or Atu4799)	(RL73_05090 or noHit)	(mlr7551 or noHit)	(noHit or noHit)	(noHit or noHit)
rxn02003	dTDP-4-dehydrorhamnose reductase	cpd00006_c0 (1) + cpd02113_c0 (1) <==> cpd00522_c0 (1) + cpd00067_c0 (1) + cpd00005_c0 (1)	NADP_c0 (1) + dTDP_rhamnose_c0 (1) <==> dTDP_4_oxo_L_rhamnose_c0 (1) + H_c0 (1) + NADPH_c0 (1)	TRUE	R02777	1.1.1.133	smb21327	WgaJ	Predicted	Becker et al 1997			Smed_4724	rmlD	noHit	rfbD	rfbD	rfbD	RL73_05080	mlr7553	noHit	noHit
rxn00559	Mannose-6-phosphate isomerase	cpd00235_c0 (1) <==> cpd00072_c0 (1)	D_mannose_6_phosphate_c0 (1) <==> D_fructose_6_phosphate_c0 (1)	TRUE	R01819	5.3.1.8	smc03111	Pmi	Experimental	Schmidt et al 1992			Smed_2871	NGR_c30520	OV14_0525	noHit	noHit	Atu3311	noHit	noHit	DK53_556	noHit
rxn01329	Phosphomannomutase	cpd00235_c0 (1) <==> cpd00485_c0 (1)	D_mannose_6_phosphate_c0 (1) <==> D_Mannose1_phosphate_c0 (1)	TRUE	R01818	5.4.2.8	smb21081	ManB	Predicted				smb21081	smb21081	smb21081	smb21081	smb21081	smb21081	smb21081	smb21081	smb21081	smb21081
rxn00640	Mannose-1-phosphate guanylyltransferase	cpd00485_c0 (1) + cpd00031_c0 (1) <==> cpd00067_c0 (1) + cpd00009_c0 (1) + cpd00083_c0 (1)	D_Mannose1_phosphate_c0 (1) + GDP_c0 (1) <==> H_c0 (1) + Phosphate_c0 (1) + GDP_mannose_c0 (1)	TRUE	R00883	2.7.7.22	smb21082	ManC	Predicted				noHit	manC	noHit	noHit	noHit	noHit	noHit	mlr7607	noHit	noHit
Glycogen biosynthesis
rxn00695	Glucose-1-phosphate adenylyltransferase	cpd00002_c0 (1) + cpd00089_c0 (1) <==> cpd00387_c0 (1) + cpd00012_c0 (1)	ATP_c0 (1) + Glucose_1_phosphate_c0 (1) <==> ADPglucose_c0 (1) + PPi_c0 (1)	TRUE	R00948	2.7.7.27	smc03923	GlgC	Predicted		Although not characterized experimentally in S. meliloti, it is situated with other glycogen related genes and is therefore likely responsible for this function.		Smed_2741	glgC	glgC	glgC	glgC	glgC	noHit	mlr7588	noHit	glgC
rxn08615	Glycogen synthase	cpd00387_c0 (1) + cpd15302_c0 (1) <==> cpd00008_c0 (1) + cpd00155_c0 (1)	ADPglucose_c0 (1) + glycogenn_1_c0 (1) <==> ADP_c0 (1) + Glycogen_c0 (1)	TRUE	R06049	2.4.1.21	(smc03924 and smc03922)	(GlgA1 and GlgB1)	Experimental	Wang et al 2007a; diCenzo and Finan 2015			(Smed_2742 and Smed_2740)	(glgA and glgB)	(glgA and glgB)	(glgA and glgB1)	(glgA and glgBch)	(glgA and glgB)	(noHit and noHit)	(mlr7589 and mlr7587)	(noHit and noHit)	(glgA and glgB)
Poly-3-hydroxybutyrate (PHB) biosynthesis
rxn00178	Acetyl-CoA acetyltransferase	cpd00022_c0 (2) <==> cpd00010_c0 (1) + cpd00279_c0 (1)	Acetyl_CoA_c0 (2) <==> CoA_c0 (1) + Acetoacetyl_CoA_c0 (1)	TRUE	R00238	2.3.1.16	smc03879	PhbA	Experimental	Trainer 2009			Smed_3117	NGR_c32720	OV14_0785	phaA	phbAch	phbA	noHit	mlr3847	phbA	phbA
rxn01453	Acetoacetyl-CoA reductase	cpd00006_c0 (1) + cpd02234_c0 (1) <==> cpd00067_c0 (1) + cpd00279_c0 (1) + cpd00005_c0 (1)	NADP_c0 (1) + R_3_Hydroxybutanoyl_CoA_c0 (1) <==> H_c0 (1) + Acetoacetyl_CoA_c0 (1) + NADPH_c0 (1)	TRUE	R01977	1.1.1.36	smc03878	PhbB	Experimental	Aneja et al 2004			Smed_3116	NGR_c32710	OV14_0783	phaB	phbB	phbB	noHit	mlr3848	noHit	phbB
rxn11920	Poly-beta-hydroxybutyrate (PHB) synthesis	cpd02234_c0 (2) + cpd12837_c0 (1) ==> cpd12836_c0 (1) + cpd00010_c0 (2)	R_3_Hydroxybutanoyl_CoA_c0 (2) + ((R)-3-Hydroxybutanoyl)(n-2) (1) ==> poly-beta-hydroxybutyrate (1) + CoA_c0 (2)	FALSE	R04254	2.3.1.-	(smc00296 and (smc02111 or smc00777))	(PhbC and (PhaP2 or PhaP1))	Experimental	Willis and Walker 1998; Wang et al 2007b			(Smed_1456 and (Smed_1115 or Smed_0319))	(phbC2 and (NGR_c13240 or NGR_c03360))	(phbC2 and (OV14_2566 or OV14_1640))	(phaC and (RL2211 or RL0770))	(phbC and (RHE_CH01905 or RHE_CH00721))	(phbC and (noHit or noHit))	(noHit and (noHit or noHit))	(mlr0937 and (mll0665 or mlr6541))	(noHit and (noHit or noHit))	(bll4360 and (bll5155 or bll7395))
Pantothenate and Coenzyme-A biosynthesis
rxn00711	UMP pyrophosphate phosphoribosyltransferase	cpd00091_c0 (1) + cpd00012_c0 (1) <==> cpd00092_c0 (1) + cpd00103_c0 (1)	UMP_c0 (1) + PPi_c0 (1) <==> Uracil_c0 (1) + PRPP_c0 (1)	TRUE	R00966	2.4.2.9	smc04121	Upp	Predicted		The genes encoding the enzymes involved in the beta-alanine biosynthetic pathway represented by rxn07111, rxn0720, rxn01626, and rxn00654 appeared non-essential in this Tn-seq data. Therefore, it is likely that an alternative pathway for the synthesis of beta-alanine exists in S. meliloti; however, what this pathway is remains unclear. However, as at least some rhizobial species can produce low a…		Smed_3343	NGR_c34570	OV14_0970	upp	upp	upp	noHit	mll3162	upp	upp
rxn00720	5_6-Dihydrouracil oxidoreductase	cpd00006_c0 (1) + cpd00337_c0 (1) <==> cpd00092_c0 (1) + cpd00067_c0 (1) + cpd00005_c0 (1)	NADP_c0 (1) + Hydrouracil_c0 (1) <==> Uracil_c0 (1) + H_c0 (1) + NADPH_c0 (1)	TRUE	R00978	1.3.1.1	(smc01814 and smc01815)	(PreT and PreA)	Predicted		We named these enzymes as PreT and PreA based on homology to the E. coli PreT and PreA proteins. The genes encoding the enzymes involved in the beta-alanine biosynthetic pathway represented by rxn07111, rxn0720, rxn01626, and rxn00654 appeared non-essential in this Tn-seq data. Therefore, it is likely that an alternative pathway for the synthesis of beta-alanine exists in S. meliloti; however, wh…		(Smed_2360 and Smed_2361)	(gltB2 and NGR_c24770)	(gltB2 and OV14_4004)	(RL3707 and pydA)	(RHE_CH03277 and RHE_CH03278)	(noHit and noHit)	(noHit and noHit)	(mll1646 and mll1643)	(DK53_324 and DK53_322)	(blr6742 and noHit)
rxn01626	5_6-Dihydrouracil amidohydrolase	cpd00001_c0 (1) + cpd00337_c0 (1) ==> cpd00067_c0 (1) + cpd01720_c0 (1)	H2O_c0 (1) + Hydrouracil_c0 (1) ==> H_c0 (1) + 3_Ureidopropanoate_c0 (1)	FALSE	R02269	3.5.2.2	smc01821	Dht	Predicted		The genes encoding the enzymes involved in the beta-alanine biosynthetic pathway represented by rxn07111, rxn0720, rxn01626, and rxn00654 appeared non-essential in this Tn-seq data. Therefore, it is likely that an alternative pathway for the synthesis of beta-alanine exists in S. meliloti; however, what this pathway is remains unclear. However, as at least some rhizobial species can produce low a…		Smed_2367	dht	noHit	dht	dht	dht	noHit	mll1629	hydA	dht
rxn00654	3-ureidopropanoate amidohydrolase	cpd00067_c0 (2) + cpd00001_c0 (1) + cpd01720_c0 (1) ==> cpd00085_c0 (1) + cpd00013_c0 (1) + cpd00011_c0 (1)	H_c0 (2) + H2O_c0 (1) + 3_Ureidopropanoate_c0 (1) ==> beta_Alanine_c0 (1) + NH3_c0 (1) + CO2_c0 (1)	FALSE	R00905	3.5.1.6	smc01820	Smc01820	Predicted		The genes encoding the enzymes involved in the beta-alanine biosynthetic pathway represented by rxn07111, rxn0720, rxn01626, and rxn00654 appeared non-essential in this Tn-seq data. Therefore, it is likely that an alternative pathway for the synthesis of beta-alanine exists in S. meliloti; however, what this pathway is remains unclear. However, as at least some rhizobial species can produce low a…		Smed_2366	amaB	amaB	atcC	amaB	amaB	noHit	mll1631	DK53_320	amaB
rxn00346	L-Aspartate 1-carboxy-lyase	cpd00041_c0 (1) + cpd00067_c0 (1) ==> cpd00011_c0 (1) + cpd00085_c0 (1)	L_Aspartate_c0 (1) + H_c0 (1) ==> CO2_c0 (1) + beta_Alanine_c0 (1)	FALSE	R00489	4.1.1.11	UnknownC	UnknownC					UnknownC	UnknownC	UnknownC	UnknownC	UnknownC	UnknownC	UnknownC	UnknownC	UnknownC	UnknownC
rxn00912	3-methyl-2-oxobutanoate hydroxymethyltransferase	cpd00123_c0 (1) + cpd00001_c0 (1) + cpd00125_c0 (1) <==> cpd00712_c0 (1) + cpd00087_c0 (1)	3_Methyl_2_oxobutanoate_c0 (1) + H2O_c0 (1) + 5_10_Methylenetetrahydrofolate_c0 (1) <==> 2_Dehydropantoate_c0 (1) + Tetrahydrofolate_c0 (1)	TRUE	R01226	2.1.2.11	smc01881	PanB	Experimental	This study			Smed_2059	panB	panB	panB	panB	panB	panB	mll0197	panB	panB
rxn01790	2-ketopantoic acid reductase	cpd00006_c0 (1) + cpd00408_c0 (1) <==> cpd00067_c0 (1) + cpd00712_c0 (1) + cpd00005_c0 (1)	NADP_c0 (1) + Pantoate_c0 (1) <==> H_c0 (1) + 2_Dehydropantoate_c0 (1) + NADPH_c0 (1)	TRUE	R02472	1.1.1.169	UnknownC	UnknownC			In some organisms, like C. glutamicum (Merkamm et al 2003), this reaction is only catalyzed by IlvC. As there does not appear to be a PanE enzyme encoded by S. meliloti, we predicted IlvC has this activity in S. meliloti. However, our data is unconsistent with this hypothesis (Figure S14), and therefore the gene encoding the enzyme catalyzing this reaction remains unknown.
rxn01791	Pantoate--beta-alanine ligase	cpd00085_c0 (1) + cpd00002_c0 (1) + cpd00408_c0 (1) ==> cpd00018_c0 (1) + cpd00644_c0 (1) + cpd00012_c0 (1)	beta_Alanine_c0 (1) + ATP_c0 (1) + Pantoate_c0 (1) ==> AMP_c0 (1) + PAN_c0 (1) + PPi_c0 (1)	FALSE	R02473	6.3.2.1	smc01880	PanC	Experimental	This study			Smed_2060	panC	panC	panC	panC	panC	panC	mll0196	panC	panC
rxn12510	Type I pantothenate kinase	cpd00002_c0 (1) + cpd00644_c0 (1) <==> cpd02201_c0 (1) + cpd00008_c0 (1)	ATP_c0 (1) + PAN_c0 (1) <==> 4_phosphopantothenate_c0 (1) + ADP_c0 (1)	TRUE	R03018	2.7.1.33	smc02567	CoaA	Experimental	This study			Smed_3257	coaA	coaA	coaA	coaA	panK	RL73_00060	mlr5019	coaA	panK
rxn09177	Phosphopantothenate---cysteine ligase	cpd00084_c0 (1) + cpd02201_c0 (1) + cpd00052_c0 (1) ==> cpd00012_c0 (1) + cpd02666_c0 (1) + cpd00046_c0 (1)	L_Cysteine_c0 (1) + 4_phosphopantothenate_c0 (1) + CTP_c0 (1) ==> PPi_c0 (1) + R_4_Phosphopantothenoyl_L_cysteine_c0 (1) + CMP_c0 (1)	FALSE	R04231	6.3.2.5	smc01161	Dfp	Experimental	This study			Smed_3566	NGR_c37070	OV14_1263	coaBC	dfp	dfp	RL73_06005	mlr3167	coaBC	dfp
rxn02341	Phosphopantothenoylcysteine decarboxylase	cpd00067_c0 (1) + cpd02666_c0 (1) ==> cpd00011_c0 (1) + cpd00834_c0 (1)	H_c0 (1) + R_4_Phosphopantothenoyl_L_cysteine_c0 (1) ==> CO2_c0 (1) + Phosphopantetheine_c0 (1)	FALSE	R03269	4.1.1.36	smc01161	Dfp	Experimental	This study			Smed_3566	NGR_c37070	OV14_1263	coaBC	dfp	dfp	RL73_06005	mlr3167	coaBC	dfp
rxn02175	Pantetheine-phosphate adenylyltransferase	cpd00002_c0 (1) + cpd00834_c0 (1) <==> cpd00655_c0 (1) + cpd00012_c0 (1)	ATP_c0 (1) + Phosphopantetheine_c0 (1) <==> Dephospho_CoA_c0 (1) + PPi_c0 (1)	TRUE	R03035	2.7.7.3	smc01209	CoaD	Experimental	This study			Smed_1264	coaD	coaD	RL2403	coaD	coaD	RL73_02075	mll0730	coaD	coaD
rxn00100	Dephospho-CoA kinase	cpd00655_c0 (1) + cpd00002_c0 (1) ==> cpd00010_c0 (1) + cpd00008_c0 (1)	Dephospho_CoA_c0 (1) + ATP_c0 (1) ==> CoA_c0 (1) + ADP_c0 (1)	FALSE	R00130	2.7.1.24	smc02790	CoaE	Experimental	This study			Smed_3212	coaE	coaE	RL0004	coaE	coaE	RL73_00155	mlr4493	coaE	coaE
NAD+ and NADP+ biosynthesis
rxn00338	L-aspartate oxidase	cpd00041_c0 (1) + cpd00007_c0 (1) ==> cpd00067_c0 (1) + cpd03470_c0 (1) + cpd00025_c0 (1)	L_Aspartate_c0 (1) + O2_c0 (1) ==> H_c0 (1) + Iminoaspartate_c0 (1) + H2O2_c0 (1)	FALSE	R00481	1.4.3.16	smc02599	NadB	Experimental	This study			Smed_0700	nadB	nadB	nadB	nadB	nadB	noHit	mll9103	noHit	nadB
rxn02988	Quinolinate synthase	cpd03470_c0 (1) + cpd00095_c0 (1) ==> cpd02333_c0 (1) + cpd00067_c0 (1) + cpd00001_c0 (2) + cpd00009_c0 (1)	Iminoaspartate_c0 (1) + Glycerone_phosphate_c0 (1) ==> Quinolinate_c0 (1) + H_c0 (1) + H2O_c0 (2) + Phosphate_c0 (1)	FALSE	R04292	2.5.1.72	smc02601	NadA	Experimental	This study			Smed_0699	nadA	nadA	nadA	nadA	nadA	noHit	mll5835	noHit	nadA
rxn02402	Nicotinate-nucleotide pyrophosphorylase	cpd02333_c0 (1) + cpd00067_c0 (2) + cpd00103_c0 (1) ==> cpd00011_c0 (1) + cpd00873_c0 (1) + cpd00012_c0 (1)	Quinolinate_c0 (1) + H_c0 (2) + PRPP_c0 (1) ==> CO2_c0 (1) + Nicotinate_ribonucleotide_c0 (1) + PPi_c0 (1)	FALSE	R03348	2.4.2.19	smc02598	NadC	Experimental	This study			Smed_0701	nadC	nadC	nadC	nadC	nadC	noHit	mll9102	noHit	nadC
rxn02155	Nicotinate-nucleotide adenylyltransferase	cpd00002_c0 (1) + cpd00873_c0 (1) <==> cpd00012_c0 (1) + cpd00638_c0 (1)	ATP_c0 (1) + Nicotinate_ribonucleotide_c0 (1) <==> PPi_c0 (1) + Deamido_NAD_c0 (1)	TRUE	R03005	2.7.7.1	smc03778	NadD	Experimental	This study			Smed_3012	nadD	nadD	nadD	nadD	nadD	RL73_06125	mll4008	nadD	nadD
rxn00138	NAD+ synthase	cpd00002_c0 (1) + cpd00013_c0 (1) + cpd00638_c0 (1) ==> cpd00018_c0 (1) + cpd00003_c0 (1) + cpd00012_c0 (1)	ATP_c0 (1) + NH3_c0 (1) + Deamido_NAD_c0 (1) ==> AMP_c0 (1) + NAD_c0 (1) + PPi_c0 (1)	FALSE	R00189	6.3.1.5	smc00161	NadE	Experimental	This study			Smed_1566	nadE2	nadE2	nadE1	nadE	nadE	RL73_04175	mll0818	nadE	noHit
rxn00077	NAD+ kinase	cpd00002_c0 (1) + cpd00003_c0 (1) <==> cpd00006_c0 (1) + cpd00008_c0 (1)	ATP_c0 (1) + NAD_c0 (1) <==> NADP_c0 (1) + ADP_c0 (1)	TRUE	R00104	2.7.1.23	smc01331	PpnK	Experimental	This study			Smed_0963	NGR_c11180	OV14_2386	ppnK	RHE_CH01651	Atu1345	RL73_00535	mll0225	DK53_927	noHit
Folate biosynthesis and metabolism
rxn01257b	4-amino-4-deoxychorismate synthase	cpd00013_c0 (1) + cpd00216_c0 (1) <==> cpd08210_c0 (1)	NH3_c0 (1) + Chorismate_c0 (1) <==> ADC_c0 (1)	TRUE			(smc04013 or UnknownC)	(PabB or UnknownC)	Predicted		pabB did not appear essential inthis Tn-seq study, suggesting that if PabB catalyzes this reaction, there must be a bypass or another ezyme capable of complementing for its loss. One possibility would be TrpE. Additionally, generally this reaction would involve L-glutamate and have two subunits, PabB and PabA. However, no pabA gene was found in the genome. As PabA is not essential when there is e…		(Smed_2685 or UnknownC)	(NGR_c28430 or UnknownC)	(OV14_0293 or UnknownC)	(pabB or UnknownC)	(pabB or UnknownC)	(pabB or UnknownC)	(RL73_03030 or UnknownC)	(mlr3005 or UnknownC)	(pabB or UnknownC)	(noHit or UnknownC)
rxn03841	4-amino-4-deoxychorismate lyase	cpd08210_c0 (1) ==> cpd00067_c0 (1) + cpd00020_c0 (1) + cpd00443_c0 (1)	ADC_c0 (1) ==> H_c0 (1) + Pyruvate_c0 (1) + ABEE_c0 (1)	FALSE	R05553	4.1.3.38	(smc04014 or UnknownC)	(PabC or UnknownC)	Predicted		The gene smc04014 was annotated as a hypothetical protein in the genome. However, given it is adjacent to pabB and its product has (weak) similarity to PabC enzymes, we predict this gene encodes a PabC enzyme and have annotated it as such. However, smc04014 did not appear essential in this Tn-seq data, suggesting that if if PabC catalyzes this reaction, there must be a bypass or another ezyme cap…		(Smed_2686 or UnknownC)	(NGR_c28440 or UnknownC)	(OV14_0294 or UnknownC)	(noHit or UnknownC)	(RHE_CH03551 or UnknownC)	(Atu3766 or UnknownC)	(noHit or UnknownC)	(mlr3007 or UnknownC)	(DK53_3055 or UnknownC)	(noHit or UnknownC)
rxn00302	GTP cyclohydrolase - 1	cpd00001_c0 (1) + cpd00038_c0 (1) ==> cpd03518_c0 (1)	H2O_c0 (1) + GTP_c0 (1) ==> Formamidopyrimidine_nucleoside_triphosphate_c0 (1)	FALSE	R00428	3.5.4.16	smc01005	FolE	Experimental	This study			Smed_1049	folE	folE	folE	folE	folE	RL73_05300	mlr0922	folE	folE
rxn03419	GTP cyclohydrolase - 2	cpd00001_c0 (1) + cpd03518_c0 (1) <==> cpd00067_c0 (1) + cpd03519_c0 (1) + cpd00047_c0 (1)	H2O_c0 (1) + Formamidopyrimidine_nucleoside_triphosphate_c0 (1) <==> H_c0 (1) + 2_5_Diaminopyrimidine_nucleoside_triphosphate_c0 (1) + Formate_c0 (1)	TRUE	R05046	3.5.4.16	smc01005	FolE	Experimental	This study			Smed_1049	folE	folE	folE	folE	folE	RL73_05300	mlr0922	folE	folE
rxn03421	GTP cyclohydrolase - 3	cpd03519_c0 (1) <==> cpd03666_c0 (1)	2_5_Diaminopyrimidine_nucleoside_triphosphate_c0 (1) <==> 2_5_Diamino_6_5_triphosphoryl_3_4_trihydroxy_2_oxopentyl__amino_4_oxopyrimidine_c0 (1)	TRUE	R05048	3.5.4.16	smc01005	FolE	Experimental	This study			Smed_1049	folE	folE	folE	folE	folE	RL73_05300	mlr0922	folE	folE
rxn03174	GTP cyclohydrolase - 3	cpd03666_c0 (1) ==> cpd00001_c0 (1) + cpd02978_c0 (1)	2_5_Diamino_6_5_triphosphoryl_3_4_trihydroxy_2_oxopentyl__amino_4_oxopyrimidine_c0 (1) ==> H2O_c0 (1) + 7_8_Dihydroneopterin_3_triphosphate_c0 (1)	FALSE	R04639	3.5.4.16	smc01005	FolE	Experimental	This study			Smed_1049	folE	folE	folE	folE	folE	RL73_05300	mlr0922	folE	folE
rxn03167	2-Amino-4-hydroxy-6-erythro-1_2_3-trihydroxypropyl	cpd00001_c0 (3) + cpd02978_c0 (1) ==> cpd00067_c0 (3) + cpd00009_c0 (3) + cpd02961_c0 (1)	H2O_c0 (3) + 7_8_Dihydroneopterin_3_triphosphate_c0 (1) ==> H_c0 (3) + Phosphate_c0 (3) + Dihydroneopterin_c0 (1)	FALSE	R04620	3.1.3.1	(smc01907 or smc03108 or smc03243)	(Smc01907 or Smc03108 or Smc03243)	Predicted		The ezyme(s) catalyzing this reaction has not been examined in S. meliloti. The Smc01907 and Smc03108 were taken from the Kbase automated S. meliloti metabolic reconstruction, and Smc03243 is from KEGG. Which, if any of these, perform this reaction requires further study.		(Smed_0876 or Smed_5060 or Smed_2977)	(NGR_c10390 or noHit or NGR_c31990)	(OV14_2304 or noHit or OV14_0652)	(RL1693 or noHit or noHit)	(RHE_CH01592 or noHit or noHit)	(Atu1263 or noHit or noHit)	(noHit or noHit or noHit)	(noHit or noHit or mll4115)	(DK53_2598 or noHit or noHit)	(noHit or bll7673 or blr0534)
rxn02504	Dihydroneopterin aldolase	cpd02961_c0 (1) <==> cpd00954_c0 (1) + cpd00229_c0 (1)	Dihydroneopterin_c0 (1) <==> 6_hydroxymethyl_dihydropterin_c0 (1) + Glycolaldehyde_c0 (1)	TRUE	R03504	4.1.2.25	smc00463	FolB	Experimental	This study			Smed_1533	folB	folB	folB	folB	folB	RL73_04090	mll0787	folB	bll3058
rxn02503	2-amino-4-hydroxy-6-hydroxymethyldihydropteridine diphosphokinase	cpd00954_c0 (1) + cpd00002_c0 (1) <==> cpd00018_c0 (1) + cpd02920_c0 (1)	6_hydroxymethyl_dihydropterin_c0 (1) + ATP_c0 (1) <==> AMP_c0 (1) + 2_Amino_4_hydroxy_6_hydroxymethyl_7_8_dihydropteridinediphosphate_c0 (1)	TRUE	R03503	2.7.6.3	smc00465	FolK	Experimental	This study			Smed_1532	folK	folK	RL2648	folK	folK	RL73_04085	mll0786	folK	folK
rxn02201	Dihydropteroate synthase	cpd02920_c0 (1) + cpd00443_c0 (1) ==> cpd00683_c0 (1) + cpd00012_c0 (1)	2_Amino_4_hydroxy_6_hydroxymethyl_7_8_dihydropteridinediphosphate_c0 (1) + ABEE_c0 (1) ==> Dihydropteroate_c0 (1) + PPi_c0 (1)	FALSE	R03067	2.5.1.15	smc00462	FolP	Experimental	This study			Smed_1534	folP	folP	folC1	folP	folP	RL73_04095	mll0788	folP	bll3059
rxn01603	Dihydrofolate synthase	cpd00683_c0 (1) + cpd00002_c0 (1) + cpd00023_c0 (1) ==> cpd00067_c0 (1) + cpd00330_c0 (1) + cpd00009_c0 (1) + cpd00008_c0 (1)	Dihydropteroate_c0 (1) + ATP_c0 (1) + L_Glutamate_c0 (1) ==> H_c0 (1) + Dihydrofolate_c0 (1) + Phosphate_c0 (1) + ADP_c0 (1)	FALSE	R02237	6.3.2.17	smc02763	FolC	Experimental	This study			Smed_3240	folC	folC	folC2	folC	folC	RL73_00120	mlr5076	folC	folC
rxn00686	Dihydrofolate reductase	cpd00006_c0 (1) + cpd00087_c0 (1) <==> cpd00067_c0 (1) + cpd00330_c0 (1) + cpd00005_c0 (1)	NADP_c0 (1) + Tetrahydrofolate_c0 (1) <==> H_c0 (1) + Dihydrofolate_c0 (1) + NADPH_c0 (1)	TRUE	R00939	1.5.1.3	smc01442	FolA	Experimental	This study			Smed_2019	folA	folA	folA	folA	folA	RL73_03285	mll1457	DK53_1367	folA
rxn01602	Dihydrofolate reductase	cpd00006_c0 (1) + cpd00330_c0 (1) <==> cpd00067_c0 (1) + cpd00393_c0 (1) + cpd00005_c0 (1)	NADP_c0 (1) + Dihydrofolate_c0 (1) <==> H_c0 (1) + Folate_c0 (1) + NADPH_c0 (1)	TRUE	R02236	1.5.1.3	smc01442	FolA	Experimental	This study			Smed_2019	folA	folA	folA	folA	folA	RL73_03285	mll1457	DK53_1367	folA
rxn00690	Formate tetrahydrofolate ligase	cpd00002_c0 (1) + cpd00087_c0 (1) + cpd00047_c0 (1) <==> cpd00201_c0 (1) + cpd00009_c0 (1) + cpd00008_c0 (1)	ATP_c0 (1) + Tetrahydrofolate_c0 (1) + Formate_c0 (1) <==> 10_Formyltetrahydrofolate_c0 (1) + Phosphate_c0 (1) + ADP_c0 (1)	TRUE	R00943	6.3.4.3	smc02728	Fhs	Predicted		Fhs did not appear essential in this Tn-seq data, likely because this reaction can be bypassed through a few other metabolic reactions.		Smed_2298	fhs	fhs	fhs	fhs	noHit	noHit	mlr2763	noHit	noHit
rxn00907	5_10-methylenetetrahydrofolate oxidoreductase	cpd00006_c0 (1) + cpd00125_c0 (1) <==> cpd00347_c0 (1) + cpd00005_c0 (1)	NADP_c0 (1) + 5_10_Methylenetetrahydrofolate_c0 (1) <==> 5_10_Methenyltetrahydrofolate_c0 (1) + NADPH_c0 (1)	TRUE	R01220	1.5.1.5	(smc03059 or smc02604)	(FolD2 or FolD1)	Experimental but incomplete	This study	In this Tn-seq data, it appeared that folD2 was essential for growth in the wild-type background, suggesting the product of folD1 has little role in this reaction in the wild-type in these conditions. However, in the strain lacking pSymA and pSymB, folD2 appeared largely dispensable. This may suggest that at least under certain conditions, the product of folD1 can compensate for the loss of folD2…		(Smed_0290 or noHit)	(folD2 or noHit)	(folD2 or noHit)	(RL0743 or noHit)	(folDch or noHit)	(folD or noHit)	(RL73_02095 or noHit)	(mlr6508 or noHit)	(DK53_2447 or noHit)	(folD or noHit)
rxn01211	5_10-Methenyltetrahydrofolate-5 hydrolasede	cpd00001_c0 (1) + cpd00347_c0 (1) <==> cpd00201_c0 (1) + cpd00067_c0 (1)	H2O_c0 (1) + 5_10_Methenyltetrahydrofolate_c0 (1) <==> 10_Formyltetrahydrofolate_c0 (1) + H_c0 (1)	TRUE	R01655	3.5.4.9	(smc03059 or smc02604)	(FolD2 or FolD1)	Experimental but incomplete	This study	In this Tn-seq data, it appeared that folD2 was essential for growth in the wild-type background, suggesting the product of folD1 has little role in this reaction in the wild-type in these conditions. However, in the strain lacking pSymA and pSymB, folD2 appeared largely dispensable. This may suggest that at least under certain conditions, the product of folD1 can compensate for the loss of folD2…		(Smed_0290 or noHit)	(folD2 or noHit)	(folD2 or noHit)	(RL0743 or noHit)	(folDch or noHit)	(folD or noHit)	(RL73_02095 or noHit)	(mlr6508 or noHit)	(DK53_2447 or noHit)	(folD or noHit)
rxn00910	5-methyltetrahydrofolate oxidoreductase	cpd00006_c0 (1) + cpd00345_c0 (1) <==> cpd00067_c0 (1) + cpd00125_c0 (1) + cpd00005_c0 (1)	NADP_c0 (1) + 5_Methyltetrahydrofolate_c0 (1) <==> H_c0 (1) + 5_10_Methylenetetrahydrofolate_c0 (1) + NADPH_c0 (1)	TRUE	R01224	1.7.99.5	smc01843	MetF	Experimental	This study			noHit	noHit	noHit	pRL90256	noHit	metF	noHit	noHit	noHit	noHit
rxn00979	Glycolaldehyde oxidoreductase	cpd00001_c0 (1) + cpd00003_c0 (1) + cpd00229_c0 (1) ==> cpd00067_c0 (2) + cpd00004_c0 (1) + cpd00139_c0 (1)	H2O_c0 (1) + NAD_c0 (1) + Glycolaldehyde_c0 (1) ==> H_c0 (2) + NADH_c0 (1) + Glycolate_c0 (1)	FALSE	R01333	1.2.1.21	UnknownC	UnknownC			This reaction was added to remove the glycolaldehyde product of the rxn02504 reaction. An anzyme performing this reaction in S. meliloti has not been identified to our knowledge.		UnknownC	UnknownC	UnknownC	UnknownC	UnknownC	UnknownC	UnknownC	UnknownC	UnknownC	UnknownC
rxn08657	Glycolate oxidase	cpd00003_c0 (1) + cpd00139_c0 (1) <==> cpd00067_c0 (1) + cpd00040_c0 (1) + cpd00004_c0 (1)	NAD_c0 (1) + Glycolate_c0 (1) <==> H_c0 (1) + Glyoxalate_c0 (1) + NADH_c0 (1)	TRUE	R00717	1.1.1.29	(smc00832 and smc00833 and smc00926)	(GlcD and GlcE and GlcF)	Predicted		This reaction was added to remove the glycolaldehyde product of the rxn02504 reaction. None of these genes appeared essential in this Tn-seq data, likely due to other fates of the glycolate/glycolaldehyde, such as excretion.		(Smed_0394 and Smed_0395 and Smed_0396)	(glcD2 and glcE2 and NGR_c03950)	(glcD2 and glcE2 and OV14_1709)	(glcD and glcE and glcF)	(glcD and glcE and glcF)	(glcD and glcE and glcF)	(noHit and noHit and noHit)	(mlr6916 and mlr6919 and mlr6920)	(DK53_2963 and DK53_2962 and DK53_2961)	(glcD and glcE and glcF)
Thiamine biosynthesis
rxn09997	Phosphomethylpyrimidine synthase	cpd00001_c0 (1) + cpd02140_c0 (1) <==> cpd00067_c0 (2) + cpd00009_c0 (1) + cpd00939_c0 (1) + cpd00229_c0 (1) + cpd00007_c0 (0.5)	H2O_c0 (1) + AIR_c0 (1) <==> H_c0 (2) + Phosphate_c0 (1) + Toxopyrimidine_c0 (1) + Glycolaldehyde_c0 (1) + O2_c0 (0.5)	TRUE	R03472	4.1.99.17	smb20615	ThiC	Experimental	Finan et al 1986; Pobigaylo et al 2008	The inclusion of thiamine in the medium during this Tn-seq study meant that this reaction was non-essential.		Smed_4174	thiC	thiC	noHit	thiC	thiC	RL73_00880	mll5795	noHit	thiC
rxn02484	Hydroxymethylpyrimidine kinase	cpd00002_c0 (1) + cpd00939_c0 (1) <==> cpd02775_c0 (1) + cpd00008_c0 (1)	ATP_c0 (1) + Toxopyrimidine_c0 (1) <==> 4_Amino_5_phosphomethyl_2_methylpyrimidine_c0 (1) + ADP_c0 (1)	TRUE	R03471	2.7.1.49	smb20962	ThiD	Experimental	Finan et al 1986; Pobigaylo et al 2008	The inclusion of thiamine in the medium during this Tn-seq study meant that this reaction was non-essential.		Smed_4962	thiD	thiD	thiD	thiD	thiD	RL73_00595	mll5788	thiD	thiD
rxn03108	Phoshomethylpyrimidine kinase	cpd00002_c0 (1) + cpd02775_c0 (1) <==> cpd02894_c0 (1) + cpd00008_c0 (1)	ATP_c0 (1) + 4_Amino_5_phosphomethyl_2_methylpyrimidine_c0 (1) <==> 4_Amino_2_methyl_5_diphosphomethylpyrimidine_c0 (1) + ADP_c0 (1)	TRUE	R04509	2.7.4.7	smb20962	ThiD	Experimental	Finan et al 1986; Pobigaylo et al 2008	The inclusion of thiamine in the medium during this Tn-seq study meant that this reaction was non-essential.		Smed_4962	thiD	thiD	thiD	thiD	thiD	RL73_00595	mll5788	thiD	thiD
rxn07295	Glycine oxidase	cpd00033_c0 (1) ==> cpd00067_c0 (3) + cpd14545_c0 (1)	Glycine_c0 (1) ==> H_c0 (3) + Iminoglycine_c0 (1)	FALSE	R07463	1.4.3.19	smb20616	ThiO	Experimental	Finan et al 1986; Pobigaylo et al 2008	The inclusion of thiamine in the medium during this Tn-seq study meant that this reaction was non-essential.		Smed_4173	NGR_b02920	OV14_a0741	noHit	thiO	thiO	RL73_00695	mll5793	thiO	thiO
rxnTHIZsyn	Thiazole synthase	cpd00002_c0 (1) + cpd08289_c0 (1) + cpd14545_c0 (1) + cpd00084_c0 (1) ==> cpd00018_c0 (1) + cpd02654_c0 (1) + cpd00035_c0 (1) + cpd00001_c0 (1) + cpd00012_c0 (1)	ATP_c0 (1) + 1_deoxy_D_xylulose5_phosphate_c0 (1) + Iminoglycine_c0 (1) + L_Cysteine_c0 (1) ==> AMP_c0 (1) + 4_Methyl_5__2_phosphoethyl_thiazole_c0 (1) + L_Alanine_c0 (1) + H2O_c0 (1) + PPi_c0 (1)	FALSE			(smc00529 and UnknownC and smb23463 and smb20617)	(NifS and Unknown and ThiS and ThiG)	Predicted		The ThiG protein forms the product of this reaction by combining the products of the ThiO and Dxs reactions above with a sulfur atom from cysteine which is transferred through a system possibly involving NifS, a protein not yet identified in S. meliloti (ThiI in E. coli) and ThiS. The inclusion of thiamine in the medium during this Tn-seq study meant that this reaction was non-essential.		(Smed_1469 and UnknownC and smb23463 and Smed_4171)	(NGR_c15400 and UnknownC and smb23463 and thiG)	(OV14_2914 and UnknownC and smb23463 and thiG)	(sufS2 and UnknownC and smb23463 and noHit)	(nifSch and UnknownC and smb23463 and thiG)	(nifS and UnknownC and smb23463 and thiG)	(RL73_04410 and UnknownC and smb23463 and RL73_00685)	(mlr0015 and UnknownC and smb23463 and mll5790)	(DK53_919 and UnknownC and smb23463 and DK53_221)	(nifS and UnknownC and smb23463 and thiG)
rxn02305	2-Methyl-4-amino-5-hydroxymethylpyrimidine diphosphate 4-methyl-4-aminopyridine-5-methyltransferase	cpd00067_c0 (1) + cpd02894_c0 (1) + cpd02654_c0 (1) <==> cpd00793_c0 (1) + cpd00012_c0 (1)	H_c0 (1) + 4_Amino_2_methyl_5_diphosphomethylpyrimidine_c0 (1) + 4_Methyl_5__2_phosphoethyl_thiazole_c0 (1) <==> Thiamine_phosphate_c0 (1) + PPi_c0 (1)	TRUE	R03223	2.5.1.3	(smc03996 or smb20618)	(ThiE2 or ThiE)	Experimental but incomplete	Finan et al 1986	Experimental evidence is consistent with ThiE catalyzing this reaction, but it has not been examined whether ThiE2 can also perform this reaction. In B. subtilis, the TenI protein first converts the substrate of the cpd02654 substrate of this reaction to a different metabolite, which is then used by ThiE (Hazra et al 2011), but ThiE can also usethe cpd02654 substrate in vitro. As we did not detec…		(Smed_2667 or Smed_4170)	(thiE or NGR_b02900)	(thiE or OV14_a0744)	(thiE2 or thiE)	(thiEch or thiEb)	(thiE or noHit)	(noHit or noHit)	(mlr3913 or mll5789)	(DK53_1655 or thiE)	(bll1519 or thiE)
rxn00438	Thiamine-phosphate kinase	cpd00793_c0 (1) + cpd00002_c0 (1) ==> cpd00008_c0 (1) + cpd00056_c0 (1)	Thiamine_phosphate_c0 (1) + ATP_c0 (1) ==> ADP_c0 (1) + TPP_c0 (1)	FALSE	R00617	2.7.4.16	smc03995	Smc03995	Predicted	This study	The smc03995 gene appeared essential in this Tn-seq data. As this gene appears to be part of an operon with thiE2 (involved in the previous reaction in thiamine biosynthesis), and as the protein catalyzing the current reaction has not been identified, we predict that Smc03995 may fulfill this function. However, this may be incorrect, particularly as thiamine was included in the medium, which we e…		Unknown	Unknown	Unknown	Unknown	Unknown	Unknown	Unknown	Unknown	Unknown	Unknown
Riboflavin and FAD+ biosynthesis
rxn00300	GTP cyclohydrolase II	cpd00001_c0 (3) + cpd00038_c0 (1) ==> cpd00957_c0 (1) + cpd00067_c0 (1) + cpd00012_c0 (1) + cpd00047_c0 (1)	H2O_c0 (3) + GTP_c0 (1) ==> 2_5_Diamino_6_5_phosphoribosylamino_4_pyrimidineone_c0 (1) + H_c0 (1) + PPi_c0 (1) + Formate_c0 (1)	FALSE	R00425	3.5.4.25	(smc00008 or UnknownC)	(RibBA or UnknownC)	Experimental but incomplete	Yang et al 2002; Yurgel et al 2014	Experimental evidence is consistent with RibBA performing this reaction (Yang et al 2002, Yurgel et al 2014). However, there appears to be another enzyme capable of complementing for the deletion of ribBA as such a mutant is not a riboflavin auxotroph (Yurgel et al 2014).		(Smed_0516 or UnknownC)	(ribA or UnknownC)	(ribA or UnknownC)	(ribA or UnknownC)	(RHE_PD00121 or UnknownC)	(ribA or UnknownC)	(RL73_01285 or UnknownC)	(mlr7463 or UnknownC)	(ribB or UnknownC)	(ribA or UnknownC)
rxn02475	Diaminohydroxyphosphoribosylaminopyrimidine deaminase	cpd00957_c0 (1) + cpd00067_c0 (1) + cpd00001_c0 (1) ==> cpd00931_c0 (1) + cpd00013_c0 (1)	2_5_Diamino_6_5_phosphoribosylamino_4_pyrimidineone_c0 (1) + H_c0 (1) + H2O_c0 (1) ==> 5_Amino_6__5_phosphoribosylaminouracil_c0 (1) + NH3_c0 (1)	FALSE	R03459	3.5.4.26	smc01772	RibD	Experimental	This study			Smed_0818	ribD	ribD	ribG	ribD	ribD*	RL73_05520	mlr8405	ribD	ribD
rxn02474	5-amino-6-(5-phosphoribosylamino)uracil reductase	cpd02720_c0 (1) + cpd00006_c0 (1) <==> cpd00067_c0 (1) + cpd00931_c0 (1) + cpd00005_c0 (1)	5_Amino_6__5_phosphoribitylaminouracil_c0 (1) + NADP_c0 (1) <==> H_c0 (1) + 5_Amino_6__5_phosphoribosylaminouracil_c0 (1) + NADPH_c0 (1)	TRUE	R03458	1.1.1.193	smc01772	RibD	Experimental	This study			Smed_0818	ribD	ribD	ribG	ribD	ribD*	RL73_05520	mlr8405	ribD	ribD
rxn05039	5-amino-6-(5-phospho-D-ribitylamino)uracil phosphatase	cpd02720_c0 (1) + cpd00001_c0 (1) ==> cpd00067_c0 (1) + cpd02882_c0 (1) + cpd00009_c0 (1)	5_Amino_6__5_phosphoribitylaminouracil_c0 (1) + H2O_c0 (1) ==> H_c0 (1) + 4__1_D_Ribitylamino_5_aminouracil_c0 (1) + Phosphate_c0 (1)	FALSE	R07280	3.1.3.104	UnknownC	UnknownC			The enzyme performing this reaction in S. meliloti has not been identified to the best of our knowledge		UnknownC	UnknownC	UnknownC	UnknownC	UnknownC	UnknownC	UnknownC	UnknownC	UnknownC	UnknownC
rxn05040	3,4-dihydroxy-2-butanone-4-phosphate synthase	cpd00171_c0 (1) ==> cpd00067_c0 (1) + cpd11225_c0 (1) + cpd00047_c0 (1)	D_Ribulose5_phosphate_c0 (1) ==> H_c0 (1) + 3_4_dihydroxy_2_butanone4_phosphate_c0 (1) + Formate_c0 (1)	FALSE	R07281	4.1.99.12	(smc00008 or UnknownC)	(RibBA or UnknownC)	Experimental but incomplete	Yang et al 2002; Yurgel et al 2014	Experimental evidence is consistent with RibBA performing this reaction (Yang et al 2002, Yurgel et al 2014). However,there appears to be another enzyme capable of complementing for the deletion of ribBA as such a mutant is not a riboflavin auxotroph (Yurgel et al 2014).		(Smed_0516 or UnknownC)	(ribA or UnknownC)	(ribA or UnknownC)	(ribA or UnknownC)	(RHE_PD00121 or UnknownC)	(ribA or UnknownC)	(RL73_01285 or UnknownC)	(mlr7463 or UnknownC)	(ribB or UnknownC)	(ribA or UnknownC)
rxn03080	6,7-dimethyl-8-ribityllumazine synthase	cpd02882_c0 (1) + cpd11225_c0 (1) <==> cpd02656_c0 (1) + cpd00067_c0 (1) + cpd00001_c0 (2) + cpd00009_c0 (1)	4__1_D_Ribitylamino_5_aminouracil_c0 (1) + 3_4_dihydroxy_2_butanone4_phosphate_c0 (1) <==> 6_7_Dimethyl_8__1_D_ribityllumazine_c0 (1) + H_c0 (1) + H2O_c0 (2) + Phosphate_c0 (1)	TRUE	R04457	2.5.1.9	(smc01609 or smc01777)	(RibH2 or RibH1)	Predicted		Neither RibH1 or RibH2 appeared essential for riboflavin biosynthesis in this Tn-seq data, and so it is likely both are functional.		(Smed_2138 or Smed_0821)	(ribH1 or ribH2)	(ribH1 or ribH2)	(ribH2 or ribH1)	(ribH2 or ribH1)	(noHit or ribH)	(noHit or RL73_05510)	(mll7281 or mlr8409)	(ribH2 or ribH)	(ribH or ribH)
rxn00048	Riboflavin synthase	cpd02656_c0 (2) ==> cpd02882_c0 (1) + cpd00220_c0 (1)	6_7_Dimethyl_8__1_D_ribityllumazine_c0 (2) ==> 4__1_D_Ribitylamino_5_aminouracil_c0 (1) + Riboflavin_c0 (1)	FALSE	R00066	2.5.1.9	(smc01773 or UnknownAB)	(RibE or UnknownAB)	Experimental but incomplete	Yang et al 2002; This study	The ribE gene appear non-essential unless pSymA and pSymB were absent in this Tn-seq study. This is both consistent with RibE having the annotated function, and with an unidentified enzyme on pSymA or pSymB possibly bypassing the need for RibE.		(Smed_0819 or UnknownAB)	(NGR_c09600 or UnknownAB)	(OV14_2244 or UnknownAB)	(ribC or UnknownAB)	(ribE or UnknownAB)	(ribc or UnknownAB)	(RL73_05515 or UnknownAB)	(mlr8407 or UnknownAB)	(ribE or UnknownAB)	(ribE or UnknownAB)
rxn00392	Riboflavin kinase	cpd00002_c0 (1) + cpd00220_c0 (1) <==> cpd00050_c0 (1) + cpd00008_c0 (1)	ATP_c0 (1) + Riboflavin_c0 (1) <==> FMN_c0 (1) + ADP_c0 (1)	TRUE	R00549	2.7.1.26	smc00909	RibF	Experimental	This study			Smed_0411	noHit	ribF	ribF	ribF	ribF	RL73_01435	mlr8243	ribF	ribF
rxn00122	FMN adenylyltransferase	cpd00002_c0 (1) + cpd00050_c0 (1) ==> cpd00015_c0 (1) + cpd00012_c0 (1)	ATP_c0 (1) + FMN_c0 (1) ==> FAD_c0 (1) + PPi_c0 (1)	FALSE	R00161	2.7.7.2	smc00909	RibF	Experimental	This study			Smed_0411	noHit	ribF	ribF	ribF	ribF	RL73_01435	mlr8243	ribF	ribF
Heme biosynthesis
rxn00599	5-aminolevulinate synthase	cpd00067_c0 (1) + cpd00078_c0 (1) + cpd00033_c0 (1) ==> cpd00338_c0 (1) + cpd00011_c0 (1) + cpd00010_c0 (1)	H_c0 (1) + Succinyl_CoA_c0 (1) + Glycine_c0 (1) ==> 5_Aminolevulinate_c0 (1) + CO2_c0 (1) + CoA_c0 (1)	FALSE	R00830	2.3.1.37	smc03104	HemA	Experimental	This study			Smed_2880	hemA	hemA	hemA1	hemAch	hemA	RL73_05895	mll5695	hemA	hemA
rxn00029	Delta-aminolevulinic acid dehydratase	cpd00338_c0 (2) ==> cpd00067_c0 (1) + cpd00001_c0 (2) + cpd00689_c0 (1)	5_Aminolevulinate_c0 (2) ==> H_c0 (1) + H2O_c0 (2) + Porphobilinogen_c0 (1)	FALSE	R00036	4.2.1.24	(smc01766 or UnknownC)	(HemB or UnknownC)	Experimental but incomplete	This study	Based on this Tn-seq data, hemB mutations had a growth defect, consistent with its annotated function, but hemB appeared non-essential suggesting a slow rate of bypass by another enzyme		(Smed_0812 or UnknownC)	(NGR_c09530 or UnknownC)	(OV14_2236 or UnknownC)	(hemB or UnknownC)	(hemB or UnknownC)	(hemB or UnknownC)	(RL73_05545 or UnknownC)	(mll8390 or UnknownC)	(hemB or UnknownC)	(noHit or UnknownC)
rxn00060	Porphobilinogen deaminase	cpd00001_c0 (1) + cpd00689_c0 (4) ==> cpd00013_c0 (4) + cpd00755_c0 (1)	H2O_c0 (1) + Porphobilinogen_c0 (4) ==> NH3_c0 (4) + Hydroxymethylbilane_c0 (1)	FALSE	R00084	4.3.1.8	smc03231	HemC	Experimental	This study			Smed_2966	hemC	hemC	hemC	hemC	hemC	RL73_03855	mll4223	hemC	hemC
rxn02264	Uroporphyrinogen-III synthase	cpd00755_c0 (1) <==> cpd00774_c0 (1) + cpd00001_c0 (1)	Hydroxymethylbilane_c0 (1) <==> UroporphyrinogenIII_c0 (1) + H2O_c0 (1)	TRUE	R03165	4.2.1.75	smc03232	HemD	Experimental	This study			Smed_2967	NGR_c32100	OV14_0640	RL4496	hemD	hem4	RL73_03860	mll4221	DK53_1814	bll0566
rxn02288	Uroporphyrinogen III decarboxylase	cpd00774_c0 (1) + cpd00067_c0 (4) <==> cpd02083_c0 (1) + cpd00011_c0 (4)	UroporphyrinogenIII_c0 (1) + H_c0 (4) <==> CoproporphyrinogenIII_c0 (1) + CO2_c0 (4)	TRUE	R03197	4.1.1.37	smc02794	HemE	Experimental	This study			Smed_3208	hemE	hemE	hemE	hemE	hemE	RL73_00170	mll4487	hemE	hemE
rxn02303	Coproporphyrinogen III oxidase	cpd00067_c0 (2) + cpd02083_c0 (1) + cpd00007_c0 (1) <==> cpd00001_c0 (2) + cpd00011_c0 (2) + cpd00791_c0 (1)	H_c0 (2) + CoproporphyrinogenIII_c0 (1) + O2_c0 (1) <==> H2O_c0 (2) + CO2_c0 (2) + ProtoporphyrinogenIX_c0 (1)	TRUE	R03220	1.3.3.3	smc00180	HemF	Experimental	This study			Smed_1549	fbcF2	fbcF2	hemF	hemF	hemF	RL73_04250	mlr2722	DK53_1506	hemF
rxn02304	Protoporphyrinogen-IX:oxygen oxidoreductase	cpd00007_c0 (3) + cpd00791_c0 (2) ==> cpd00001_c0 (6) + cpd01476_c0 (2)	O2_c0 (3) + ProtoporphyrinogenIX_c0 (2) ==> H2O_c0 (6) + Protoporphyrin_c0 (2)	FALSE	R03222	1.3.3.4	UnknownC	UnknownC			This enzyme has not been identified in S. meliloti to the best of our knowledge		UnknownC	UnknownC	UnknownC	UnknownC	UnknownC	UnknownC	UnknownC	UnknownC	UnknownC	UnknownC
rxn00224	Protoporphyrin ferrochelatase	cpd10515_c0 (1) + cpd01476_c0 (1) <==> cpd00028_c0 (1) + cpd00067_c0 (2)	Fe2_c0 (1) + Protoporphyrin_c0 (1) <==> Heme_c0 (1) + H_c0 (2)	TRUE	R00310	4.99.1.1	smc04019	HemH	Experimental	This study			Smed_2691	hemH	hemH	hemH	hemH	hemH	hemH	mlr3019	hemH	hemH
rxn08707	Protoheme IX farnesyltransferase	cpd00028_c0 (1) + cpd00001_c0 (1) + cpd00350_c0 (1) <==> cpd00012_c0 (1) + cpd11313_c0 (1)	Heme_c0 (1) + H2O_c0 (1) + Farnesyldiphosphate_c0 (1) <==> PPi_c0 (1) + hemeO_c0 (1)	TRUE	R07411	2.5.1.-	smc00450	CtaB	Experimental	This study	In this Tn-seq data, mutation of ctaA appeared to result in very slow growth but appeared non essential, possibly suggesting Heme O is not absolutely essential for growth.		Smed_0520	ctaB	ctaB	ctaB	ctaB	ctaB	RL73_01280	mlr7493	cyoE	coxE
rxn12825	Heme A synthase	cpd00001_c0 (1) + cpd11313_c0 (1) ==> cpd00067_c0 (4) + cpd11312_c0 (1)	H2O_c0 (1) + hemeO_c0 (1) ==> H_c0 (4) + hemeA_c0 (1)	FALSE	R07412	1.3.-.-	smc01800	CtaA	Experimental	This study	In this Tn-seq data, mutation of ctaA appeared to result in slow growth but appeared non essential, possibly suggesting Heme A is not absolutely essential for growth.		Smed_0858	NGR_c10180	OV14_2276	cox15	RHE_CH01565	cox15	noHit	mlr8450	DK53_787	cox15
Vitamin B12 (Cobalamin) biosynthesis
rxn01609	Threonine phosphate synthase	cpd00002_c0 (1) + cpd00161_c0 (1) <==> cpd00008_c0 (1) + cpd08928_c0 (1)	ATP_c0 (1) + L_Threonine_c0 (1) <==> ADP_c0 (1) + L_Threonine_phosphate_c0 (1)	TRUE	R06531	2.7.1.177	UnknownC	UnknownC			The enzyme performing this reaction in S. meliloti has not been identified to the best of our knowledge		UnknownC	UnknownC	UnknownC	UnknownC	UnknownC	UnknownC	UnknownC	UnknownC	UnknownC	UnknownC
rxn04385	Threonine-phosphate decarboxylase	cpd00067_c0 (1) + cpd08928_c0 (1) ==> cpd00011_c0 (1) + cpd02547_c0 (1)	H_c0 (1) + L_Threonine_phosphate_c0 (1) ==> CO2_c0 (1) + R_1_Aminopropan_2_yl_phosphate_c0 (1)	FALSE	R06530	4.1.1.81	smc04281	CobC	Experimental	This study			Smed_1744	cobC	cobC	cobC	cobC	cobC	noHit	mll1303	DK53_1274	cobC
rxn03975	NADPH-dependent FMN reductase	cpd00067_c0 (1) + cpd00050_c0 (1) + cpd00005_c0 (1) ==> cpd00006_c0 (1) + cpd01270_c0 (1)	H_c0 (1) + FMN_c0 (1) + NADPH_c0 (1) ==> NADP_c0 (1) + FMNH2_c0 (1)	FALSE	R05706	1.5.1.29	smb20573	Smb20573	Predicted		This is not an essential reaction since other enzymes can reduce FMN, but this one was included to ensure sufficient flux without disturbing other reactions, and KEGG includes this enzyme as catalyzing this reaction.		Smed_4212	noHit	noHit	pRL100232	RHE_PC00012	Atu5527	noHit	mlr5227	noHit	noHit
rxnBluB	5,6-dimethylbenzimidazole synthase	cpd01270_c0 (1) + cpd00007_c0 (1) ==> cpd01997_c0 (1) + cpd00236_c0 (1) + cpd00001_c0	FMNH2_c0 (1) + O2_c0 (1) ==> Dimethylbenzimidazole_c0 (1) + D_Erythrose4_phosphate_c0 (1) + H2O_c0	FALSE	R09083	1.13.11.79	smc00166	BluB	Experimental	Campbell et al 2006; Taga et al 2007	While bluB has previously been shown to be essential for this reaction, we note that bluB did not appear to be essential in this Tn-seq data in either strain - perhaps the product of the reaction is excreted by the bluB+ cells of the population, thereby complementing the bluB- phenotype of the small percentage of the population that would have been bluB mutants.		Smed_1562	bluB	noHit	RL2681	RHE_CH02368	Atu1654	noHit	mll7468	bluB	bll3254
rxn02897	Nicotinate-nucleotide---dimethylbenzimidazole phosphoribosyltransferase	cpd01997_c0 (1) + cpd00873_c0 (1) <==> cpd00067_c0 (1) + cpd00218_c0 (1) + cpd02904_c0 (1)	Dimethylbenzimidazole_c0 (1) + Nicotinate_ribonucleotide_c0 (1) <==> H_c0 (1) + Niacin_c0 (1) + alpha_Ribazole_5_phosphate_c0 (1)	TRUE	R04148	2.4.2.21	smc04214	CobU	Experimental	Crofts et al 2013; This study			Smed_1603	cobU	cobU	cobT	cobU	cobT	noHit	mll0563	cobT	cobU
rxn01265	Nicotinate phosphoribosyltransferase	cpd00873_c0 (1) + cpd00012_c0 (1) <==> cpd00067_c0 (1) + cpd00218_c0 (1) + cpd00103_c0 (1)	Nicotinate_ribonucleotide_c0 (1) + PPi_c0 (1) <==> H_c0 (1) + Niacin_c0 (1) + PRPP_c0 (1)	TRUE	R01724	6.3.4.21	(smc02276 or NonEssential)	(PncB or NonEssential)	Predicted		The function of this gene is predicted based on homology. It did not appear essential in this Tn-seq data. This was included to remove the accumulation of niacin from the rx02897 reaction, and PncB is therefore likely non-essential due to other fates of the niacin when this reaction is blocked. A NonEssential gene has been added so that PncB is not essential in silico.		(Smed_0200 or NonEssential)	(pncB or NonEssential)	(pncB or NonEssential)	(RL0191 or NonEssential)	(pncB or NonEssential)	(pncB or NonEssential)	(RL73_00745 or NonEssential)	(mll4892 or NonEssential)	(pncB or NonEssential)	(pncB or NonEssential)
rxn03150	Alpha-ribazole phosphatase	cpd00001_c0 (1) + cpd02904_c0 (1) ==> cpd00067_c0 (1) + cpd03423_c0 (1) + cpd00009_c0 (1)	H2O_c0 (1) + alpha_Ribazole_5_phosphate_c0 (1) ==> H_c0 (1) + alpha_Ribazole_c0 (1) + Phosphate_c0 (1)	FALSE	R04594	3.1.3.73	UnknownC	UnknownC			It is unclear what enzyme performs this reaction in S. meliloti to the best of our knowledge.		UnknownC	UnknownC	UnknownC	UnknownC	UnknownC	UnknownC	UnknownC	UnknownC	UnknownC	UnknownC
rxn02287	Uroporphyrin-III C-methyltransferase	cpd00774_c0 (1) + cpd00017_c0 (2) <==> cpd00067_c0 (2) + cpd00019_c0 (2) + cpd01620_c0 (1)	UroporphyrinogenIII_c0 (1) + S_Adenosyl_L_methionine_c0 (2) <==> H_c0 (2) + S_Adenosyl_homocysteine_c0 (2) + Precorrin_2_c0 (1)	TRUE	R03194	2.1.1.107	(smc04284 or smc01053 or smb20987)	(CobA or CysG or Smb20987)	Experimental but incomplete	This study	All three of the indicated proteins could potentially have this function. Based on this Tn-seq data, mutations of cobA have the greatest effect on growth, suggesting that CobA is the primary enzyme responsible for this reaction.		(Smed_1746 or Smed_1099 or Smed_4522)	(cobA or cysG or NGR_b11360)	(cobA or cysG or OV14_b0113)	(cobA or cysG2 or noHit)	(cobA or cysG or noHit)	(cobA or cysG or cysG)	(noHit or noHit or noHit)	(mlr1386 or mll3232 or noHit)	(cobA or cobA or noHit)	(noHit or blr1477 or noHit)
rxn02775	Precorrin-2 C(20)-methyltransferase	cpd00067_c0 (1) + cpd01620_c0 (1) + cpd00017_c0 (1) <==> cpd00019_c0 (1) + cpd03420_c0 (1)	H_c0 (1) + Precorrin_2_c0 (1) + S_Adenosyl_L_methionine_c0 (1) <==> S_Adenosyl_homocysteine_c0 (1) + Precorrin_3A_c0 (1)	TRUE	R03948	2.1.1.130	smc03191	CobI	Experimental	This study			Smed_2816	cobI	cobI	cobI	cobI	cobI	noHit	mlr1380	cobI	cobI
rxn11545	Precorrin-3B synthase	cpd03420_c0 (1) + cpd00007_c0 (0.5) <==> cpd03833_c0 (1)	Precorrin_3A_c0 (1) + O2_c0 (0.5) <==> Precorrin_3B_c0 (1)	TRUE	R05217	1.14.13.83	smc03193	CobG	Experimental	This study			Smed_2818	cobG	cobG	cobG	cobG	cobG	noHit	mlr1378	noHit	noHit
rxn03513	Precorrin-3B C(17)-methyltransferase	cpd03833_c0 (1) + cpd00017_c0 (1) <==> cpd00067_c0 (2) + cpd03834_c0 (1) + cpd00019_c0 (1)	Precorrin_3B_c0 (1) + S_Adenosyl_L_methionine_c0 (1) <==> H_c0 (2) + Precorrin_4_c0 (1) + S_Adenosyl_homocysteine_c0 (1)	TRUE	R05180	2.1.1.131	smc03190	CobJ	Experimental	This study			Smed_2815	cobJ	cobJ	cobJ	cobJ	cobJ	noHit	mlr1381	noHit	cobJ
rxn03514	Precorrin-4 C(11)-methyltransferase	cpd03834_c0 (1) + cpd00017_c0 (1) <==> cpd00067_c0 (1) + cpd00019_c0 (1) + cpd03839_c0 (1)	Precorrin_4_c0 (1) + S_Adenosyl_L_methionine_c0 (1) <==> H_c0 (1) + S_Adenosyl_homocysteine_c0 (1) + Precorrin_5_c0 (1)	TRUE	R05181	2.1.1.133	smc03187	CobM	Experimental	This study			Smed_2812	cobM	cobM	cobM	cobM	cobM	noHit	mlr1385	cobM	cobM
rxn03534	Precorrin 6A synthase	cpd00001_c0 (1) + cpd00017_c0 (1) + cpd03839_c0 (1) <==> cpd03761_c0 (1) + cpd00067_c0 (2) + cpd00019_c0 (1) + cpd00029_c0 (1)	H2O_c0 (1) + S_Adenosyl_L_methionine_c0 (1) + Precorrin_5_c0 (1) <==> Precorrin_6A_c0 (1) + H_c0 (2) + S_Adenosyl_homocysteine_c0 (1) + Acetate_c0 (1)	TRUE	R05219	2.1.1.152	smc03194	CobF	Experimental	This study			Smed_2819	cobF	cobF	cobF	cobF	noHit	noHit	mlr1461	noHit	cobF
rxn03492	Precorrin-6A reductase	cpd00006_c0 (1) + cpd03760_c0 (1) <==> cpd03761_c0 (1) + cpd00067_c0 (1) + cpd00005_c0 (1)	NADP_c0 (1) + Precorrin_6B_c0 (1) <==> Precorrin_6A_c0 (1) + H_c0 (1) + NADPH_c0 (1)	TRUE	R05150	1.3.1.54	smc03189	CobK	Experimental	This study			Smed_2814	cobK	cobK	cobK	cobK	cobK	noHit	mll1382	DK53_1279	cobK
rxn03491	Precorrin-6Y C5,15-methyltransferase	cpd03760_c0 (1) + cpd00017_c0 (2) <==> cpd00067_c0 (2) + cpd03835_c0 (1) + cpd00019_c0 (2) + cpd00011_c0 (1)	Precorrin_6B_c0 (1) + S_Adenosyl_L_methionine_c0 (2) <==> H_c0 (2) + Precorrin_8_c0 (1) + S_Adenosyl_homocysteine_c0 (2) + CO2_c0 (1)	TRUE	R05149	2.1.1.132	smc03188	CobL	Experimental	This study			Smed_2813	cobL	cobL	cobL	cobL	cobL	noHit	mlr1383	cbiT	cobL
rxn03512	Precorrin-8X methylmutase	cpd00067_c0 (1) + cpd03835_c0 (1) <==> cpd03832_c0 (1)	H_c0 (1) + Precorrin_8_c0 (1) <==> Hydrogenobyrinate_c0 (1)	TRUE	R05177	5.4.99.61	smc03192	CobH	Experimental	This study			Smed_2817	cobH	cobH	cobH	cobH	cbiC	noHit	mlr1379	DK53_1266	cobH
rxn11544	Hydrogenobyrinic acid a,c-diamide synthase	cpd00002_c0 (2) + cpd00001_c0 (1) + cpd03832_c0 (1) + cpd00053_c0 (2) <==> cpd03913_c0 (1) + cpd00012_c0 (1) + cpd00023_c0 (2) + cpd00008_c0 (2)	ATP_c0 (2) + H2O_c0 (1) + Hydrogenobyrinate_c0 (1) + L_Glutamine_c0 (2) <==> Hydrogenobyrinate_diamide_c0 (1) + PPi_c0 (1) + L_Glutamate_c0 (2) + ADP_c0 (2)	TRUE	R05224	6.3.5.9	smc04282	CobB	Experimental	This study			Smed_1745	cobB	cobB	cobB	cobB	cobB	noHit	mlr1387	cobB	cobB
rxn10476	Hydrogenobyrinic acid a,c-diamide cobaltochelatase	cpd03913_c0 (1) + cpd00002_c0 (1) + cpd00001_c0 (1) + cpd00149_c0 (1) <==> cpd00067_c0 (2) + cpd00009_c0 (1) + cpd03914_c0 (1) + cpd00008_c0 (1)	Hydrogenobyrinate_diamide_c0 (1) + ATP_c0 (1) + H2O_c0 (1) + Co2_c0 (1) <==> H_c0 (2) + Phosphate_c0 (1) + CobIIyrinate_diamide_c0 (1) + ADP_c0 (1)	TRUE	R05227	6.6.1.2	(smc04303 and smc00700 and smc00701 and smc04304)	(CobN and CobS and CobT and CobW)	Experimental but incomplete	Cowie et al 2006; This study	Each of cobN, cobS, and cobT appeared essential in this Tn-seq data, consistent with their function. Few insertions were found in cobW in wild-type, and none were found in the absence of pSymA and pSymB, consistent with an important function of CobW in cobalamin biosynthesis. However, the role of this protein is not known. It is often found downstream of CobN and may play a role in loading of the…		(Smed_1759 and Smed_2560 and Smed_2559 and Smed_1760)	(noHit and cobS and cobT and cobW)	(cobN and cobS and cobT and cobW)	(cobN and cobS and cobT and cobW)	(cobN and cobS and cobT and cobW)	(noHit and cobS and cobT and cobW)	(noHit and noHit and noHit and noHit)	(noHit and mll3563 and mll3561 and mlr1375)	(cobN and cobS and cobT and cobW)	(noHit and cobS and cobT and cobW)
rxn11650	Cob(II)yrinic acid a,c-diamide reductase	cpd03914_c0 (2) + cpd01270_c0 (1) <==> cpd00067_c0 (2) + cpd00050_c0 (1) + cpd03915_c0 (2)	CobIIyrinate_diamide_c0 (2) + FMNH2_c0 (1) <==> H_c0 (2) + FMN_c0 (1) + CobIyrinate_diamide_c0 (2)	TRUE	R05218	1.16.8.1	UnknownC	UnknownC			It is unclear what enzyme performs this reaction in S. meliloti.		UnknownC	UnknownC	UnknownC	UnknownC	UnknownC	UnknownC	UnknownC	UnknownC	UnknownC	UnknownC
rxn03535	Cob(I)yrinic acid a,c-diamide adenosyltransferase	cpd00002_c0 (1) + cpd03915_c0 (1) <==> cpd03916_c0 (1) + cpd00421_c0 (1)	ATP_c0 (1) + CobIyrinate_diamide_c0 (1) <==> Adenosyl_cobyrinate_diamide_c0 (1) + Triphosphate_c0 (1)	TRUE	R05220	2.5.1.17	smc04302	CobO	Experimental	This study	In this Tn-seq data, cobO appeared to be essential. Another putative CobO is encoded by smc00731; however, both genes are also present in S. fredii NGR234, and mutation of just the smc04302 ortholog, but not the smc00731 (the second putative cobO) ortholog, resulted in cobalamin auxotrophy (Medina et al 2009).		Smed_1758	cobO	cobO	cobO	cobO	cobO	noHit	mll1306	cobO	cobO
rxn03540	Adenosylcobyric acid synthase	cpd00002_c0 (4) + cpd00001_c0 (4) + cpd03916_c0 (1) + cpd00053_c0 (4) <==> cpd00067_c0 (4) + cpd03917_c0 (1) + cpd00009_c0 (4) + cpd00023_c0 (4) + cpd00008_c0 (4)	ATP_c0 (4) + H2O_c0 (4) + Adenosyl_cobyrinate_diamide_c0 (1) + L_Glutamine_c0 (4) <==> H_c0 (4) + Adenosylcobyric_acid_c0 (1) + Phosphate_c0 (4) + L_Glutamate_c0 (4) + ADP_c0 (4)	TRUE	R05225	6.3.5.10	smc04309	CobQ	Experimental	This study			Smed_1765	NGR_c18240	OV14_3196	cobQ	cobQ	cbiP	noHit	mll1198	cobQ	cbiP
rxn04384	Adenosylcobinamide-phosphate synthase	cpd00002_c0 (1) + cpd03917_c0 (1) + cpd02547_c0 (1) <==> cpd00067_c0 (2) + cpd00009_c0 (1) + cpd03919_c0 (1) + cpd00008_c0 (1)	ATP_c0 (1) + Adenosylcobyric_acid_c0 (1) + R_1_Aminopropan_2_yl_phosphate_c0 (1) <==> H_c0 (2) + Phosphate_c0 (1) + Adenosyl_cobinamide_phosphate_c0 (1) + ADP_c0 (1)	TRUE	R06529	6.3.1.10	smc04279	CobD	Experimental	Campbell et al 2006; This study			Smed_1743	cobD	cobD	cobD	cobD	cobD	noHit	mlr1304	cobD	cobD
rxn03537	Adenosylcobinamide-phosphate guanylyltransferase	cpd00067_c0 (1) + cpd03919_c0 (1) + cpd00038_c0 (1) <==> cpd03920_c0 (1) + cpd00012_c0 (1)	H_c0 (1) + Adenosyl_cobinamide_phosphate_c0 (1) + GTP_c0 (1) <==> Adenosylcobinamide_GDP_c0 (1) + PPi_c0 (1)	TRUE	R05222	2.7.7.62	smc04305	CobP	Experimental	This study			Smed_1761	cobP	cobP	cobP	cobP	cobP	noHit	mll1308	cobP	cobP
rxn03538	Cobalamin synthase	cpd03920_c0 (1) + cpd03423_c0 (1) <==> cpd00126_c0 (1) + cpd00166_c0 (1)	Adenosylcobinamide_GDP_c0 (1) + alpha_Ribazole_c0 (1) <==> GMP_c0 (1) + Calomide_c0 (1)	TRUE	R05223	2.7.8.26	smc04215	CobV	Experimental	This study			Smed_1604	noHit	OV14_3084	cobV	cobV	cobS	noHit	mlr1388	cobS	cobV
Ubiquinone biosynthesis
rxn03909	1-deoxy-D-xylulose-5-phosphate synthase	cpd00102_c0 (1) + cpd00067_c0 (1) + cpd00020_c0 (1) ==> cpd08289_c0 (1) + cpd00011_c0 (1)	Glyceraldehyde3_phosphate_c0 (1) + H_c0 (1) + Pyruvate_c0 (1) ==> 1_deoxy_D_xylulose5_phosphate_c0 (1) + CO2_c0 (1)	FALSE	R05636	2.2.1.7	smc00972	Dxs	Experimental	Cowie et al 2006; This study			Smed_0492	NGR_c04950	OV14_1817	dxs	dxs	dxs	noHit	mlr7474	dxs	dxs
rxn03958	1-deoxy-D-xylulose 5-phosphate reductoisomerase	cpd00006_c0 (1) + cpd08286_c0 (1) <==> cpd00067_c0 (1) + cpd08289_c0 (1) + cpd00005_c0 (1)	NADP_c0 (1) + 2_C_methyl_D_erythritol4_phosphate_c0 (1) <==> H_c0 (1) + 1_deoxy_D_xylulose5_phosphate_c0 (1) + NADPH_c0 (1)	TRUE	R05688	1.1.1.267	smc03105	Dxr	Experimental	This study			Smed_2879	NGR_c30680	OV14_0544	dxr	dxr	dxr	noHit	noHit	noHit	dxr
rxn03907	MEP cytidylyltransferase	cpd08286_c0 (1) + cpd00052_c0 (1) <==> cpd08287_c0 (1) + cpd00012_c0 (1)	2_C_methyl_D_erythritol4_phosphate_c0 (1) + CTP_c0 (1) <==> 4__cytidine5_diphospho_2_C_methyl_D_erythritol_c0 (1) + PPi_c0 (1)	TRUE	R05633	2.7.7.60	smc01040	IspDF	Experimental	This study			Smed_1087	NGR_c12940	OV14_2530	ispDF	ispDF	ispF	noHit	mll0395	ispD	bll4485
rxn03908	CDP-ME kinase	cpd08287_c0 (1) + cpd00002_c0 (1) <==> cpd08288_c0 (1) + cpd00008_c0 (1)	4__cytidine5_diphospho_2_C_methyl_D_erythritol_c0 (1) + ATP_c0 (1) <==> 2_phospho_4__cytidine5_diphospho_2_C_methyl_D_erythritol_c0 (1) + ADP_c0 (1)	TRUE	R05634	2.7.1.148	smc00862	IspE	Experimental	This study			Smed_0456	ispE	ispE	RL0935	ispE	ipk	noHit	mll7422	ispE	ipk
rxn03910	MECDP-synthase	cpd08288_c0 (1) <==> cpd08301_c0 (1) + cpd00046_c0 (1)	2_phospho_4__cytidine5_diphospho_2_C_methyl_D_erythritol_c0 (1) <==> 2_C_methyl_D_erythritol2_4_cyclodiphosphate_c0 (1) + CMP_c0 (1)	TRUE	R05637	4.6.1.12	smc01040	IspDF	Experimental	This study			Smed_1087	NGR_c12940	OV14_2530	ispDF	ispDF	ispF	noHit	mll0395	ispD	bll4485
rxn05293	MECDPDH_c0	cpd00067_c0 (1) + cpd08301_c0 (1) + cpd00004_c0 (1) ==> cpd00001_c0 (1) + cpd00003_c0 (1) + cpd08615_c0 (1)	H_c0 (1) + 2_C_methyl_D_erythritol2_4_cyclodiphosphate_c0 (1) + NADH_c0 (1) ==> H2O_c0 (1) + NAD_c0 (1) + 1_Hydroxy_2_methyl_2_butenyl_4_diphosphate_c0 (1)	FALSE		1.17.7.3	smc03888	IspG	Experimental	This study			Smed_3133	NGR_c32790	OV14_0796	RL4630	gcpE	gcpE	noHit	mll3792	ispG	gcpE
rxn08352	1-hydroxy-2-methyl-2-E-butenyl-4-diphosphate reductase	cpd00067_c0 (1) + cpd00004_c0 (1) + cpd08615_c0 (1) ==> cpd00001_c0 (1) + cpd00003_c0 (1) + cpd00202_c0 (1)	H_c0 (1) + NADH_c0 (1) + 1_Hydroxy_2_methyl_2_butenyl_4_diphosphate_c0 (1) ==> H2O_c0 (1) + NAD_c0 (1) + DMAPP_c0 (1)	FALSE	R08210	1.17.1.4	smc00016	IspH	Experimental	This study			Smed_0527	lytB	lytB	ispH	lytB	lytB	noHit	mlr7502	ispH	blr1314
rxn04113	Isopentenyl diphosphate oxidoreductase	cpd00067_c0 (1) + cpd08615_c0 (1) + cpd00005_c0 (1) ==> cpd00113_c0 (1) + cpd00006_c0 (1) + cpd00001_c0 (1)	H_c0 (1) + 1_Hydroxy_2_methyl_2_butenyl_4_diphosphate_c0 (1) + NADPH_c0 (1) ==> Isopentenyldiphosphate_c0 (1) + NADP_c0 (1) + H2O_c0 (1)	FALSE	R05884	1.17.1.4	smc00016	IspH	Experimental	This study			Smed_0527	lytB	lytB	ispH	lytB	lytB	noHit	mlr7502	ispH	blr1314
rxn01213	Dimethylallyl_diphosphate_isopentenyl_diphosphate_c0	cpd00113_c0 (1) + cpd00202_c0 (1) ==> cpd00012_c0 (1) + cpd00283_c0 (1)	Isopentenyldiphosphate_c0 (1) + DMAPP_c0 (1) ==> PPi_c0 (1) + Geranyldiphosphate_c0 (1)	FALSE	R01658	2.5.1.1	(smc03884 or UnknownC)	(IspA or UnknownC)	Predicted		The ispA gene appeared non-essential in this Tn-seq study, suggesting that if IspA has the annotated function, a bypass is encoded elsewhere on the chromosome.		(Smed_3122 or UnknownC)	(NGR_c32770 or UnknownC)	(OV14_0793 or UnknownC)	(ispA or UnknownC)	(ispA or UnknownC)	(ispA or UnknownC)	(noHit or UnknownC)	(mlr3784 or UnknownC)	(ispA or UnknownC)	(ispA or UnknownC)
rxn01466	Geranyl_diphosphate_isopentenyl_diphosphate_geranyltrans_transferase_c0	cpd00113_c0 (1) + cpd00283_c0 (1) ==> cpd00012_c0 (1) + cpd00350_c0 (1)	Isopentenyldiphosphate_c0 (1) + Geranyldiphosphate_c0 (1) ==> PPi_c0 (1) + Farnesyldiphosphate_c0 (1)	FALSE	R02003	2.5.1.10	(smc03884 or UnknownC)	(IspA or UnknownC)	Predicted		The ispA gene appeared non-essential in this Tn-seq study, suggesting that if IspA has the annotated function, a bypass is encoded elsewhere on the chromosome.		(Smed_3122 or UnknownC)	(NGR_c32770 or UnknownC)	(OV14_0793 or UnknownC)	(ispA or UnknownC)	(ispA or UnknownC)	(ispA or UnknownC)	(noHit or UnknownC)	(mlr3784 or UnknownC)	(ispA or UnknownC)	(ispA or UnknownC)
rxnUB1	Octaprenyl-diphosphate synthase	cpd00350_c0 (1) + cpd00113_c0 (5) <==> cpd00012_c0 (5) + cpd02557_c0 (1)	Farnesyldiphosphate_c0 (1) + Isopentenyldiphosphate_c0 (5) <==> PPi_c0 (5) + Farnesylfarnesylgeraniol_c0 (1)	TRUE	R09248	2.5.1.90	smc00860	IspB	Experimental	Seo et al 2010; This study			Smed_0458	ispB	ispB	ispB	ispB	ispB	RL73_00525	mlr7426	DK53_428	ispB
rxn00966	Chorismate lyase	cpd00216_c0 (1) ==> cpd00136_c0 (1) + cpd00020_c0 (1)	Chorismate_c0 (1) ==> 4_Hydroxybenzoate_c0 (1) + Pyruvate_c0 (1)	FALSE	R01302	4.1.3.40	UnknownC	UnknownC					UnknownC	UnknownC	UnknownC	UnknownC	UnknownC	UnknownC	UnknownC	UnknownC	UnknownC	UnknownC
rxn03893	4-hydroxybenzoate polyprenyltransferase	cpd00136_c0 (1) + cpd02557_c0 (1) ==> cpd03443_c0 (1) + cpd00012_c0 (1)	4_Hydroxybenzoate_c0 (1) + Farnesylfarnesylgeraniol_c0 (1) ==> 3_Octaprenyl_4_hydroxybenzoate_c0 (1) + PPi_c0 (1)	FALSE	R05615	2.5.1.39	smc00988	UbiA	Experimental	This study			Smed_0477	NGR_c04790	OV14_1798	RL0956	ubiA	ubiA	ubiA	mll7442	ubiA	ubiA
rxn03393	3-octaprenyl-4-hydroxybenzoate carboxy-lyase	cpd03443_c0 (1) + cpd00067_c0 (1) ==> cpd00011_c0 (1) + cpd03444_c0 (1)	3_Octaprenyl_4_hydroxybenzoate_c0 (1) + H_c0 (1) ==> CO2_c0 (1) + 2_Octaprenylphenol_c0 (1)	FALSE	R04986	4.1.1.-	(smb20135 or UnknownC)	(Smb20135 or UnknownC)	Predicted		The enzyme catalyzing this reaction in S. meliloti is not known. The indicated protein is one possible candidate, but even if this protein has this activity, there must be at least one additional copy on the chromosome otherwise strains lacking pSymB would not grow on minimal medium, which they do.		(Smed_4000 or UnknownC)	(ubiX or UnknownC)	(ubiX or UnknownC)	(RL4462 or UnknownC)	(noHit or UnknownC)	(noHit or UnknownC)	(noHit or UnknownC)	(noHit or UnknownC)	(noHit or UnknownC)	(blr3530 or UnknownC)
rxn03394	2-octaprenylphenol hydroxylase	cpd00067_c0 (1) + cpd00007_c0 (1) + cpd03444_c0 (1) + cpd00005_c0 (1) ==> cpd00006_c0 (1) + cpd00001_c0 (1) + cpd03445_c0 (1)	H_c0 (1) + O2_c0 (1) + 2_Octaprenylphenol_c0 (1) + NADPH_c0 (1) ==> NADP_c0 (1) + H2O_c0 (1) + 2_Octaprenyl_6_hydroxyphenol_c0 (1)	FALSE	R04987	1.14.13.-	(UnknownC and smc01156)	(UnknownC and UbiB)	Experimental but incomplete	This study	Based on this Tn-seq study, ubiB appears to be an essential gene and is therefore likely involved in this reaction as expected. However, UbiB orthologs are expected not to directly catalyze this reaction but to instead be a kinase regulator of the UbiI protein that performs this reaction. As this enzyme is not identified in S. meliloti, an UnknownC has been added.		(UnknownC and Smed_3571)	(UnknownC and NGR_c37120)	(UnknownC and OV14_1274)	(UnknownC and ubiB)	(UnknownC and aarF)	(UnknownC and aarF)	(UnknownC and RL73_06010)	(UnknownC and mlr3166)	(UnknownC and ubiB)	(UnknownC and aarF)
rxn03395	2-octaprenyl-6-hydroxyphenol methylase	cpd00017_c0 (1) + cpd03445_c0 (1) ==> cpd03446_c0 (1) + cpd00067_c0 (1) + cpd00019_c0 (1)	S_Adenosyl_L_methionine_c0 (1) + 2_Octaprenyl_6_hydroxyphenol_c0 (1) ==> 2_Octaprenyl_6_methoxyphenol_c0 (1) + H_c0 (1) + S_Adenosyl_homocysteine_c0 (1)	FALSE	R04988	2.1.1.64	smc02440	UbiG	Experimental	This study			Smed_2506	ubiG	ubiG	ubiG	ubiG	ubiG	RL73_01560	mlr3442	ubiG	ubiG
rxn12224	2-octaprenyl-6-methoxyphenol hydroxylase	cpd03446_c0 (1) + cpd00007_c0 (1) ==> cpd00001_c0 (1) + cpd03447_c0 (1)	2_Octaprenyl_6_methoxyphenol_c0 (1) + O2_c0 (1) ==> H2O_c0 (1) + 2_Octaprenyl_6_methoxy_1_4_benzoquinone_c0 (1)	FALSE	R04989	1.14.13.-	smc03804	UbiH	Experimental but incomplete	This study	S. meliloti encodes two proteins that show homology to UbiH proteins, which are encoded by smc03804 and smc00316, but no apparent UbiF ortholog. UbiH and UbiF proteins are similar to each other. We therefore suggest that one of the UbiH orthologs in S. meliloti functions as UbiH and the other as UbiF. We have annotated the protein encoded by smc03804 as UbiH as it shows more similarity to this pr…		Smed_3048	NGR_c31520	OV14_0706	ubiF	RHE_CH03976	Atu2755	noHit	mlr4251	DK53_1826	bll0603
rxn03397	2-methoxy-6-polyprenyl-1,4-benzoquinol methylase	cpd00017_c0 (1) + cpd03447_c0 (1) ==> cpd00067_c0 (1) + cpd03448_c0 (1) + cpd00019_c0 (1)	S_Adenosyl_L_methionine_c0 (1) + 2_Octaprenyl_6_methoxy_1_4_benzoquinone_c0 (1) ==> H_c0 (1) + 2_Octaprenyl_3_methyl_6_methoxy_1_4_benzoquinone_c0 (1) + S_Adenosyl_homocysteine_c0 (1)	FALSE	R04990	2.1.1.-	smc01155	UbiE	Experimental but incomplete	This study	The ubiE gene appeared essential in a wild-type S. meliloti strain in a this Tn-seq study, but did not appear essential in the absence of pSymA and pSymB. It is unclear why this is.		Smed_3572	ubiE3	ubiE3	ubiE	ubiE	ubiE	RL73_06015	mlr3165	DK53_2177	ubiE
rxn04139	2_Octaprenyl_3_methyl_6_methoxy_1_4_benzoquinone__NADPH2_oxygen_c0	cpd03448_c0 (1) + cpd00007_c0 (1) + cpd00005_c0 (1) ==> cpd00006_c0 (1) + cpd00001_c0 (1) + cpd03449_c0 (1)	2_Octaprenyl_3_methyl_6_methoxy_1_4_benzoquinone_c0 (1) + O2_c0 (1) + NADPH_c0 (1) ==> NADP_c0 (1) + H2O_c0 (1) + 2_Octaprenyl_3_methyl_5_hydroxy_6_methoxy_1_4_benzoquinone_c0 (1)	FALSE	R06146	1.14.13.-	smc00316	UbiF	Predicted		S. meliloti encodes two proteins that show homology to UbiH proteins, which are encoded by smc03804 and smc00316, but no apparent UbiF ortholog. UbiH and UbiF proteins are similar to each other. We therefore suggest that one of the UbiH orthologs in S. meliloti functions as UbiH and the other as UbiF. We have annotated the protein encoded by smc03804 as UbiH as it shows more similarity to this pr…		Smed_1421	NGR_c14480	OV14_2757	ubiF	RHE_CH01962	ubiH	noHit	mlr0511	DK53_2640	blr4586
rxn11946	3-demethylubiquinone-9 3-methyltransferase	cpd03449_c0 (1) + cpd00017_c0 (1) ==> cpd15560_c0 (1) + cpd00019_c0 (1)	2_Octaprenyl_3_methyl_5_hydroxy_6_methoxy_1_4_benzoquinone_c0 (1) + S_Adenosyl_L_methionine_c0 (1) ==> Ubiquinone_8_c0 (1) + S_Adenosyl_homocysteine_c0 (1)	FALSE	R05614	2.1.1.64	smc02440	UbiG	Experimental	This study			Smed_2506	ubiG	ubiG	ubiG	ubiG	ubiG	RL73_01560	mlr3442	ubiG	ubiG
rxn01486	trans,trans-Farnesyl-diphosphate:isopentenyl-diphosphate	cpd00113_c0 (1) + cpd00350_c0 (1) ==> cpd00012_c0 (1) + cpd00289_c0 (1)	Isopentenyldiphosphate_c0 (1) + Farnesyldiphosphate_c0 (1) ==> PPi_c0 (1) + Geranylgeranyl_diphosphate_c0 (1)	FALSE	R02061	2.5.1.29	Unknown	Unknown
rxn01489	Geranylgeranyl_diphosphate_geranylgeranyl_diphosphate_c0	cpd00289_c0 (2) ==> cpd00012_c0 (1) + cpd02168_c0 (1)	cpd00289_c0 (2) ==> PPi_c0 (1) + Prephytoene_diphosphate_c0 (1)	FALSE	R02065	2.5.1.32	smc02055	CrtB	Experimental	This study			Smed_1176	NGR_c13830	OV14_2627	RL2057	crtB	crtB	RL73_03325	mll1068	DK53_887	bll4732
rxn05031	prephytoene_diphosphate_geranylgeranyl_diphosphate_c0	cpd02168_c0 (1) ==> cpd03205_c0 (1) + cpd00012_c0 (1)	Prephytoene_diphosphate_c0 (1) ==> Phytoene_c0 (1) + PPi_c0 (1)	FALSE	R07270	2.5.1.32	smc02055	CrtB	Experimental	This study			Smed_1176	NGR_c13830	OV14_2627	RL2057	crtB	crtB	RL73_03325	mll1068	DK53_887	bll4732
Oxidative phosphorylation
rxn10122	NADH dehydrogenase _ Complex I	cpd00067_c0 (4.5) + cpd15560_c0 (1) + cpd00004_c0 (1) ==> cpd00067_e0 (3.5) + cpd15561_c0 (1) + cpd00003_c0 (1)	H_c0 (4.5) + Ubiquinone_8_c0 (1) + NADH_c0 (1) ==> H_e0 (3.5) + Ubiquinol_8_c0 (1) + NAD_c0 (1)	FALSE	R02163	1.6.5.3	(smc01912 and smc01913 and smc01914 and smc01915 and smc01917 and smc01918 and smc01920 and smc01921 and smc01922 and smc01923 and smc01924 and smc01925 and smc01926 and smc01927)	(NuoA1 and NuoB1 and NuoC1 and NuoD1 and NuoE1 and NuoF1 and NuoG1 and NuoH and NuoI and NuoJ and NuoK1 and NouL and NouM and NouN)	Experimental but incomplete	Cowie et al 2006; This study	Each of nuoB1, nuoE1, and nuoK1 appeared largely dispensible in this Tn-seq study when pSymA and pSymB were absent, but not when they were present. This may suggest that these proteins are required for the optimal functioning of this complex, but may not be absolutely required for it to function.		(Smed_0888 and Smed_0889 and Smed_0890 and Smed_0891 and Smed_0893 and Smed_0894 and Smed_0896 and Smed_0897 and Smed_0898 and Smed_0899 and Smed_0900 and Smed_0901 and Smed_0902 and Smed_0903)	(nuoA2 and nuoB2 and nuoC2 and nuoD2 and nuoE2 and nuoF2 and nuoG2 and nuoH2 and nuoI1 and nuoJ and nuoK and nuoL and nuoM1 and nuoN2)	(nuoA2 and nuoB2 and nuoC2 and nuoD2 and nuoE2 and nuoF2 and nuoG2 and nuoH2 and nuoI1 and nuoJ and nuoK and nuoL and nuoM1 and nuoN2)	(nqo1 and nqo6 and nqo5 and nqo4 and nqo2 and nqo1 and nqo3 and nuoH and nuoI and nqo10 and nuoK and nqo14 and nuoM and nuoN)	(nuoA1 and nuoB1 and nuoC1 and nuoD1 and nuoE1 and nuoF1 and nuoG1 and nuoH1 and nuoI and nuoJ and nuoK1 and nuoL and nuoM1 and nuoN1)	(nuoA and nuoB and nuoC and nouD and nuoE and nuoF and nuoG and nuoH and nuoI and nuoJ and nuoK and nuoL and nuoM and nuoN)	(RL73_01465 and RL73_01470 and RL73_01475 and RL73_01480 and noHit and RL73_01490 and RL73_01495 and RL73_01500 and RL73_01505 and RL73_01510 and RL73_01515 and RL73_01520 and RL73_01525 and RL73_01530)	(mll1372 and mll1371 and mll1369 and mll1367 and mll1366 and mll1365 and mll1362 and mll1361 and mll1359 and mll1358 and mll1357 and mll1355 and mll1354 and mll1352)	(DK53_803 and DK53_804 and nqo5 and nuoD and nuoE and nuoF and nuoG and DK53_810 and DK53_811 and DK53_812 and DK53_813 and DK53_814 and DK53_815 and DK53_816)	(nuoA and nuoB and nuoC and nouD and bll4914 and nuoF and nuoG and nuoH and nuoI and nuoJ and bll4907 and nuoL and nuoM and nuoN)
rxnFADH2	FADH2 dependent ubiquinone reduction	cpd00982_c0 (1) + cpd15560_c0 (1) ==> cpd15561_c0 (1) + cpd00015_c0 (1)	FADH2_c0 (1) + Ubiquinone_8_c0 (1) ==> Ubiquinol_8_c0 (1) + FAD_c0 (1)	FALSE							This reaction has been added without any GPRs for the transfer of electrons from FADH2, produced by succinate dehydrogenase or glycerol-3-phosphate dehydrogenase, to ubiquinone, which is normally done by the corresponding enzyme that reduces the FADH2.
rxn12750	Cytochrome C reductase	cpd00109_c0 (2) + cpd15561_c0 (1) ==> cpd00067_e0 (2) + cpd00110_c0 (2) + cpd15560_c0 (1)	Cytochrome_c3_c0 (2) + Ubiquinol_8_c0 (1) ==> H_e0 (2) + Cytochrome_c2_c0 (2) + Ubiquinone_8_c0 (1)	FALSE	R02161	1.10.2.2	(smc00189 and smc00188 and smc00187)	(FbcC and FbcB and FbcF)	Experimental	This study	Based on this Tn-seq data, mutations of any of these genes appeared to have a fitness decrease, consistent with their annotated function. However, their mutation was not lethal as is common in prokaryotes due to alternate ubiquinol oxidases, such as D-lactate dehydrogenase.		(Smed_1539 and Smed_1540 and Smed_1541)	(fbcC and fbcB and fbcF3)	(fbcC and fbcB and fbcF3)	(petC and petB and petA)	(fbcC and fbcB and fbcF)	(fbcC and fbcB and fbcF)	(noHit and noHit and noHit)	(mll2705 and mll2706 and mll2707)	(DK53_1498 and DK53_1499 and petA)	(noHit and noHit and blr2485)
rxn00058a	Cytochrome C oxidase	cpd00067_c0 (4) + cpd00110_c0 (4) + cpd00007_c0 (1) <==> cpd00001_c0 (2) + cpd00109_c0 (4) + cpd00067_e0 (4)	H_c0 (4) + Cytochrome_c2_c0 (4) + O2_c0 (1) <==> H2O_c0 (2) + Cytochrome_c3_c0 (4) + H_e0 (4)	TRUE	R00081	1.9.3.1	(((smc00009 and smc00010 and smc00013) or (smc01982 and smc01983 and smc01984 and smc01985)) and ((smc02361 and smc02362 and smc02363 and smc02364) and (smc03847 and smc03848 and smc03849 and smc03850) and smc00012 and smc03851 and smc00248 and smc00085 and smc01471))	(((CtaC and CtaD and CtaE) or (CoxM and CoxN and CoxO and CoxP)) and ((CycH and CycJ and CycK and CycL) and (CcmA and CcmB and CcmC and CcmD) and CtaG and CcmG and CcdA and Surf1 and SenC))	Experimental but incomplete	Yurgel et al 2007; Cinege et al 2004; Kereszt et al 1995; Davies and Walker 2007a; Capella et al 2006; Pobigaylo et al 2008; Griffitts and Long 2008	In this Tn-seq data, fewer insertions were found in the cta genes than in the cox genes, which may suggeest that the Cta cytochrome c oxidase is the primary cytochrome c oxidase in free-living S. meliloti.		(((Smed_0518 and Smed_0519 and Smed_0523) or (Smed_2425 and Smed_2426 and Smed_2427 and Smed_2428)) and ((Smed_0633 and Smed_0634 and Smed_0635 and Smed_0636) and (Smed_3084 and Smed_3085 and Smed_3086 and Smed_3087) and Smed_0522 and Smed_3088 and Smed_1423 and Smed_0526 and Smed_2053))	(((ctaC and ctaD and ctaE) or (coxM and coxN and coxO and coxP)) and ((cycH and NGR_c07800 and cycK and cycL) and (NGR_c32370 and ccmB and ccmC and noHit) and ctaG and NGR_c32340 and NGR_c14460 and NGR_c05310 and senC))	(((ctaC and ctaD and ctaE) or (coxM and coxN and coxO and coxP)) and ((cycH and OV14_2041 and cycK and cycL) and (OV14_0747 and ccmB and ccmC and noHit) and ctaG and OV14_0743 and OV14_2755 and OV14_1851 and senC))	(((ctaC and ctaD and ctaE) or (ctaC2 and ctaD2 and ctaE2 and cyoC)) and ((cycH and cycJ and ccmF and ccmH) and (ccmA and ccmB and cycZ and noHit) and ctaG and cycY and ccdA and RL1029 and RL3288))	(((ctaC and ctaD and ctaE) or (coxM and coxN and coxO and coxP)) and ((cycH and cycJ and cycK and cycL) and (ccmA and ccmB and ccmC and cycX) and ctaG and cycY and ccsA and RHE_CH00960 and senC))	(((coxB and coxA and coxC) or (noHit and noHit and noHit and noHit)) and ((cycH and cycJ and cycK and cycL) and (ccmA and ccmB and ccmC and Atu2689) and coxG and ccmG and ccdA and surf1 and sco1))	(((noHit and noHit and noHit) or (noHit and noHit and noHit and noHit)) and ((noHit and noHit and noHit and noHit) and (noHit and noHit and noHit and noHit) and noHit and noHit and noHit and noHit and noHit))	(((mlr7490 and mlr7491 and mlr7496) or (mlr1039 and mlr1041 and mlr1042 and mlr1043)) and ((mlr7688 and mlr7689 and mlr7690 and mlr7691) and (mll4333 and mll4332 and mlr8327 and msl4331) and mlr7495 and mll4330 and mll0838 and mlr7500 and mlr1532))	(((coxB and ctaD and ctaE) or (noHit and noHit and noHit and noHit)) and ((ccmI and DK53_623 and ccmF and DK53_625) and (ccmA and ccmB and ccmC and noHit) and ctaG and cycY and DK53_2629 and DK53_496 and DK53_1384))	(((coxB and coxA and coxC) or (coxM and coxN and coxO and coxP)) and ((cycH and cycJ and cycK and cycL) and (ccmA and ccmB and ccmC and noHit) and coxG and ccmG and ccdA and noHit and blr1131))
rxn10042	ATP synthase	cpd00067_e0 (4) + cpd00009_c0 (1) + cpd00008_c0 (1) <==> cpd00002_c0 (1) + cpd00067_c0 (3) + cpd00001_c0 (1)	H_e0 (4) + Phosphate_c0 (1) + ADP_c0 (1) <==> ATP_c0 (1) + H_c0 (3) + H2O_c0 (1)	TRUE	R00086	3.6.3.14	(smc00870 and smc02498 and smc00868 and smc00869 and smc00872 and smc02501 and smc02500 and smc02499 and smc00871 and smc02502)	(AtpE and AtpH and AtpF and AtpF2 and AtpI and AtpD and AtpG and AtpA and AtpB and AtpC)	Experimental but incomplete	Cowie et al 2006; This study	All genes had no or few insertions in this Tn-seq data, except for atpI which is expected to be non-essential (Gay 1984) but has not been characterized in S. meliloti.		(Smed_0448 and Smed_2925 and Smed_0450 and Smed_0449 and Smed_0446 and Smed_2922 and Smed_2923 and Smed_2924 and Smed_0447 and Smed_2921)	(NGR_c04480 and atpH and atpF1 and atpF2 and NGR_c04460 and atpD and atpG and atpA and atpB and atpC)	(OV14_1768 and atpH and atpF1 and atpF2 and OV14_1766 and atpD and atpG and atpA and atpB and atpC)	(atpE and atpH and atpF and atpG2 and atpI and atpD and atpG and atpA and atpB and atpC)	(atpE and atpH and atpF2 and atpF1 and atpI and atpD and atpG and atpA and atpB and atpC)	(atpC and atpH and atpF and atpB and atpI and atpD and atpG and atpA and atpA and atpC)	(RL73_03750 and RL73_05970 and RL73_03740 and noHit and noHit and RL73_05955 and RL73_05960 and RL73_05965 and RL73_03755 and RL73_05950)	(msr7412 and mll4066 and mlr7415 and mlr7413 and noHit and mll4060 and mll4063 and mll4065 and mlr7411 and mll4059)	(DK53_415 and atpH and atpF and DK53_416 and noHit and atpD and atpG and atpA and atpB and atpC)	(atpC and atpH and atpB and atpB' and noHit and atpD and atpG and atpA and atpA and atpC)
Pyridoxal 5-phosphate (vitamin B6) biosynthesis
rxn01331	D-erythrose 4-phosphate dehydrogenase	cpd00236_c0 (1) + cpd00001_c0 (1) + cpd00003_c0 (1) ==> cpd00067_c0 (2) + cpd00004_c0 (1) + cpd02147_c0 (1)	D_Erythrose4_phosphate_c0 (1) + H2O_c0 (1) + NAD_c0 (1) ==> H_c0 (2) + NADH_c0 (1) + 4_Phosphoerythronate_c0 (1)	FALSE	R01825	1.2.1.72	UnknownC	UnknownC			This enzyme has not been identified in S. meliloti (Tazoe et al 2000, Tazoe et al 2006)		UnknownC	UnknownC	UnknownC	UnknownC	UnknownC	UnknownC	UnknownC	UnknownC	UnknownC	UnknownC
rxn02939	Erythronate-4-phosphate dehydrogenase	cpd00003_c0 (1) + cpd02147_c0 (1) <==> cpd00004_c0 (1) + cpd00067_c0 (1) + cpd03606_c0 (1)	NAD_c0 (1) + 4_Phosphoerythronate_c0 (1) <==> NADH_c0 (1) + H_c0 (1) + 2_Oxo_3_hydroxy_4_phosphobutanoate_c0 (1)	TRUE	R04210	1.1.1.290	smc00985	PdxR	Experimental	Tazoe et al 2006; This study			Smed_0480	NGR_c04820	OV14_1802	RL0959	RHE_CH00898	Atu0723	RL73_00480	mlr7440	DK53_434	bll2569
rxn03445	Phosphoserine aminotransferase	cpd03607_c0 (1) + cpd00024_c0 (1) <==> cpd03606_c0 (1) + cpd00023_c0 (1)	4_Phosphonooxy_threonine_c0 (1) + 2_Oxoglutarate_c0 (1) <==> 2_Oxo_3_hydroxy_4_phosphobutanoate_c0 (1) + L_Glutamate_c0 (1)	TRUE	R05085	2.6.1.52	UnknownC	UnknownC	Predicted		The SerC enzyme is involved in both serine and pyridoxal biosynthesis in E. coli; however, our data was inconsistent with this dual function of SerC in S. meliloti (Figure S14). It therefore remains unclear which gene encodes the enzyme responsible for this reaction.
rxn03951	4-hydroxythreonine-4-phosphate dehydrogenase _ catalyzed	cpd00003_c0 (1) + cpd03607_c0 (1) <==> cpd00067_c0 (1) + cpd04539_c0 (1) + cpd00004_c0 (1)	NAD_c0 (1) + 4_Phosphonooxy_threonine_c0 (1) <==> H_c0 (1) + 2_Amino_3_oxo_4_phosphonooxybutyrate_c0 (1) + NADH_c0 (1)	TRUE	R05681	1.1.1.262	smc00580	PdxA1	Experimental	This study			Smed_0761	pdxA3	pdxA3	pdxA1	pdxAch	pdxA	RL73_01360	mll7861	pdxA	pdxA
rxn05116	4-hydroxythreonine-4-phosphate dehydrogenase _ spontaneous	cpd00067_c0 (1) + cpd04539_c0 (1) ==> cpd00011_c0 (1) + cpd08449_c0 (1)	H_c0 (1) + 2_Amino_3_oxo_4_phosphonooxybutyrate_c0 (1) ==> CO2_c0 (1) + 3_Amino_2_oxopropyl_phosphate_c0 (1)	FALSE	R07406		Spontaneous	Spontaneous					Spontaneous	Spontaneous	Spontaneous	Spontaneous	Spontaneous	Spontaneous	Spontaneous	Spontaneous	Spontaneous	Spontaneous
rxn04070	Pyridoxine 5'-phosphate synthase	cpd08289_c0 (1) + cpd08449_c0 (1) ==> cpd00067_c0 (2) + cpd00001_c0 (2) + cpd00009_c0 (1) + cpd00478_c0 (1)	1_deoxy_D_xylulose5_phosphate_c0 (1) + 3_Amino_2_oxopropyl_phosphate_c0 (1) ==> H_c0 (2) + H2O_c0 (2) + Phosphate_c0 (1) + Pyridoxine_phosphate_c0 (1)	FALSE	R05838	2.6.99.2	smc01407	PdxJ	Experimental	This study			Smed_1982	pdxJ	pdxJ	pdxJ	pdxJ	pdxJ	RL73_00865	mll1418	pdxJ	pdxJ
rxn00209	Pyridoxamine 5'-phosphate oxidase	cpd00007_c0 (1) + cpd00478_c0 (1) ==> cpd00016_c0 (1) + cpd00025_c0 (1)	O2_c0 (1) + Pyridoxine_phosphate_c0 (1) ==> Pyridoxal_phosphate_c0 (1) + H2O2_c0 (1)	FALSE	R00278	1.4.3.5	smc00069	PdxH	Experimental	This study			Smed_0509	pdxH	pdxH	pdxH	pdxH	pdxH	RL73_01675	mll7454	pdxH	pdxH
Polyphosphate biosynthesis
rxnPolyPi1	Polyphosphate kinase	cpd00002_c0 (1) + cpdPolyPn_c0 (1) <==> cpdPolyPn1_c0 (1) + cpd00008_c0 (1)	ATP_c0 (1) + Polyphosphate_n_c0 (1) <==> Polyphosphate_n+1_c0 (1) + ADP_c0 (1)	TRUE	R02184	2.7.4.1	(smc00618 or sma0172 or sma0670)	(Ppk or Sma0172 or Sma0670)	Experimental but incomplete	This study	In this Tn-seq study, insertions within ppk were readily obtained in the wild-type strain but few insertions were found in a strain lacking pSymA or pSymB. This is consistent with polyphosphate synthesis being a core aspect of S. meliloti metabolism, and that at least one additional polyphosphate kinase exists on pSymA or pSymB, the most likely being the two listed genes.		(Smed_0795 or Smed_5283 or Smed_5190)	(NGR_c09360 or NGR_b14470 or NGR_c18720)	(OV14_2213 or OV14_0510 or noHit)	(ppk or pRL100445 or RL2867)	(ppk or RHE_PC00203 or noHit)	(ppk or noHit or noHit)	(RL73_05445 or noHit or noHit)	(mlr8161 or mlr8387 or noHit)	(ppk1 or noHit or noHit)	(ppk or bll2813 or bll3480)
Glutathione biosynthesis
rxn00646	Glutamate--cysteine ligase	cpd00002_c0 (1) + cpd00084_c0 (1) + cpd00023_c0 (1) ==> cpd00067_c0 (1) + cpd00506_c0 (1) + cpd00009_c0 (1) + cpd00008_c0 (1)	ATP_c0 (1) + L_Cysteine_c0 (1) + L_Glutamate_c0 (1) ==> H_c0 (1) + gamma_Glutamylcysteine_c0 (1) + Phosphate_c0 (1) + ADP_c0 (1)	FALSE	R00894	6.3.2.2	smc00825	GshA	Experimental	Harrison et al 2005; This study			Smed_0387	NGR_c03850	OV14_1697	RL0855	gsh	gsh1	RL73_01680	mll6902	DK53_2465	gshA
rxn00351	Glutathione synthase	cpd00002_c0 (1) + cpd00506_c0 (1) + cpd00033_c0 (1) ==> cpd00067_c0 (1) + cpd00042_c0 (1) + cpd00009_c0 (1) + cpd00008_c0 (1)	ATP_c0 (1) + gamma_Glutamylcysteine_c0 (1) + Glycine_c0 (1) ==> H_c0 (1) + GSH_c0 (1) + Phosphate_c0 (1) + ADP_c0 (1)	FALSE	R00497	6.3.2.3	(smc00419 or smb21586)	(GshB1 or GshB2)	Experimental but incomplete	Harrison et al 2005; This study	One study presented experimental evidence that mutation of the chromosomal gshB1 gene prevented glutathionine biosynthesis, consistent with GshB1 being the only functional protein. However, in this Tn-seq study, gshB1 only appeared to be an essential protein in the absence of pSymA and pSymB, consistent with GshB1 and GshB2 both having this activity.		(Smed_3546 or Smed_4907)	(gshB2 or gshB1)	(gshB2 or gshB1)	(RL0338 or noHit)	(gshB or noHit)	(gshB or gshB)	(RL73_01065 or noHit)	(mll4735 or noHit)	(gshB or noHit)	(gshB or noHit)
rxn00086	Glutathione reductase	cpd00006_c0 (1) + cpd00042_c0 (2) <==> cpd00067_c0 (1) + cpd00111_c0 (1) + cpd00005_c0 (1)	NADP_c0 (1) + GSH_c0 (2) <==> H_c0 (1) + Oxidized_glutathione_c0 (1) + NADPH_c0 (1)	TRUE	R00115	1.8.1.7	smc00154	Gor	Experimental	This study			Smed_1571	NGR_c17000	OV14_3042	gor	gor	gor	RL73_03765	mll0523	gor	gor
Miscellaneous core reactions
rxn00001	Pyrophosphate phosphohydrolase	cpd00001_c0 (1) + cpd00012_c0 (1) ==> cpd00067_c0 (2) + cpd00009_c0 (2)	H2O_c0 (1) + PPi_c0 (1) ==> H_c0 (2) + Phosphate_c0 (2)	FALSE	R00004	3.6.1.1	smc03239	Ppa	Experimental	This study			Smed_2974	NGR_c32020	OV14_0648	ppa	ppa	ppa	RL73_05185	mll4120	ppa	ppa
rxn00102	Carbonic acid hydrolyase	cpd00067_c0 (1) + cpd00242_c0 (1) <==> cpd00001_c0 (1) + cpd00011_c0 (1)	H_c0 (1) + H2CO3_c0 (1) <==> H2O_c0 (1) + CO2_c0 (1)	TRUE	R00132	4.2.1.1	smc04083	CynT	Experimental	This study			Smed_3185	NGR_c33240	OV14_0849	cynT	cynT	cah	RL73_06235	mlr4135	DK53_1758	cah
rxn00006	Catalase	cpd00025_c0 (2) ==> cpd00001_c0 (2) + cpd00007_c0 (1)	H2O2_c0 (2) ==> H2O_c0 (2) + O2_c0 (1)	FALSE	R00009	1.11.1.6	(smb20007 or sma2379 or smc00819)	(KatC or KatB or KatA)	Experimental but incomplete	Ardissone et al 2004	While experimental evidence has shown all of these proteins to have catalase activity, it has not been demonstrated that these are the only catalases in the proteome.		(Smed_4123 or Smed_5331 or Smed_0383)	(catC or NGR_b12570 or noHit)	(noHit or OV14_b0543 or noHit)	(katE or katG or noHit)	(noHit or katG or noHit)	(catE or katA or noHit)	(noHit or noHit or noHit)	(mlr2101 or mlr6940 or noHit)	(noHit or noHit or katA)	(noHit or blr0778 or noHit)
rxn00226	Acetyl-CoA ligase - 1	cpd00002_c0 (1) + cpd00029_c0 (1) + cpd00067_c0 (1) <==> cpd03566_c0 (1) + cpd00012_c0 (1)	ATP_c0 (1) + Acetate_c0 (1) + H_c0 (1) <==> Acetyladenylate_c0 (1) + PPi_c0 (1)	TRUE	R00316	6.2.1.1	smc04093	AcsA1	Experimental	Aneja et al 2002	This reaction was included in order to remove the build up of acetate resulting from several metabolic reactions. However, this reaction is expected to not be essential for real cells due to other potential fates of acetate, including excretion.		Smed_3194	ascA	ascA	acs	acsA2	acs	noHit	mlr4089	acs	blr0573
rxn00176	Acetyl-CoA ligase - 2	cpd00010_c0 (1) + cpd03566_c0 (1) <==> cpd00018_c0 (1) + cpd00022_c0 (1)	CoA_c0 (1) + Acetyladenylate_c0 (1) <==> AMP_c0 (1) + Acetyl_CoA_c0 (1)	TRUE	R00236	6.2.1.1	smc04093	AcsA1	Experimental	Aneja et al 2002	This reaction was included in order to remove the build up of acetate resulting from several metabolic reactions. However, this reaction is expected to not be essential for real cells due to other potential fates of acetate, including excretion.		Smed_3194	ascA	ascA	acs	acsA2	acs	noHit	mlr4089	acs	blr0573
rxn00126	S-adenosylmethionine synthetase	cpd00060_c0 (1) + cpd00002_c0 (1) + cpd00001_c0 (1) ==> cpd00009_c0 (1) + cpd00017_c0 (1) + cpd00012_c0 (1)	L_Methionine_c0 (1) + ATP_c0 (1) + H2O_c0 (1) ==> Phosphate_c0 (1) + S_Adenosyl_L_methionine_c0 (1) + PPi_c0 (1)	FALSE	R00177	2.5.1.6	smc01109	MetK	Experimental	This study			Smed_0046	metK	metK	metK	metK	metK	RL73_00985	mlr5545	metK	metK
rxn00141	S-adenosyl-homocysteine hydrolase	cpd00001_c0 (1) + cpd00019_c0 (1) <==> cpd00182_c0 (1) + cpd00135_c0 (1)	H2O_c0 (1) + S_Adenosyl_homocysteine_c0 (1) <==> Adenosine_c0 (1) + Homocysteine_c0 (1)	TRUE	R00192	3.3.1.1	smc02755	AhcY	Experimental	This study			Smed_3247	ahcY	noHit	RL0031	ahcY	ahcY	noHit	mll5088	ahcY	ahcY
rxn01138	Adenosine orthophosphate ribosyltransferase	cpd00067_c0 (1) + cpd00182_c0 (1) + cpd00009_c0 (1) <==> cpd00475_c0 (1) + cpd00128_c0 (1)	H_c0 (1) + Adenosine_c0 (1) + Phosphate_c0 (1) <==> Ribose_1_phosphate_c0 (1) + Adenine_c0 (1)	TRUE	R01561	2.4.2.1	(smc00850 or smc04123)	(Smc00850 or DeoD)	Predicted		This reaction was included to get rid of the adenosine buildup due to the rxn00141, but is unlikely to be essential in real cells presumably due to other fates of adenosine or the export of adenosine build up.		(Smed_0467 or Smed_3341)	(NGR_c04720 or deoD)	(OV14_1789 or deoD)	(RL0950 or punA)	(RHE_CH00889 or deoD)	(Atu0645 or deoD)	(noHit or noHit)	(mll0105 or mlr3159)	(noHit or noHit)	(noHit or blr0960)
rxn00926	Adenine aminohydrolase	cpd00067_c0 (1) + cpd00128_c0 (1) + cpd00001_c0 (1) ==> cpd00226_c0 (1) + cpd00013_c0 (1)	H_c0 (1) + Adenine_c0 (1) + H2O_c0 (1) ==> HYXN_c0 (1) + NH3_c0 (1)	FALSE	R01244	3.5.4.2	(sma1718 or smc01533 or smb21278 or sma1715)	(AdeC4 or AdeC1 or AdeC2 or AdeC3)	Predicted		This reaction was included to get rid of the adenosine buildup due to the rxn00141, but is unlikely to be essential in real cells presumably due to other fates of adenosine or the export of adenosine build up.		(Smed_5275 or Smed_2318 or Smed_4610 or Smed_5277)	(noHit or adeC or noHit or noHit)	(adeC or adeC or adeC or adeC)	(noHit or ade1 or ade3 or noHit)	(noHit or adeC1 or adeC2 or noHit)	(noHit or adeC or adeC or noHit)	(noHit or noHit or noHit or noHit)	(noHit or noHit or noHit or mlr0157)	(noHit or ade or noHit or noHit)	(noHit or noHit or noHit or blr3165)
rxn00836	IMP pyrophosphate phosphoribosyltransferase	cpd00226_c0 (1) + cpd00103_c0 (1) ==> cpd00114_c0 (1) + cpd00012_c0 (1)	HYXN_c0 (1) + PRPP_c0 (1) ==> IMP_c0 (1) + PPi_c0 (1)	FALSE	R01132	2.4.2.8	smc00719	Hpt	Predicted		This reaction was included to get rid of the adenosine buildup due to the rxn00141, but is unlikely to be essential in real cells presumably due to other fates of adenosine or the export of adenosine build up.		Smed_2541	NGR_c26990	OV14_0115	hprT	hpt	hpt	noHit	mll3520	hpt	noHit
rxn00778	D-Ribose-1_5-phosphomutase	cpd00475_c0 (1) <==> cpd00101_c0 (1)	Ribose_1_phosphate_c0 (1) <==> ribose_5_phosphate_c0 (1)	TRUE	R01057	5.4.2.7	smc04119	DeoB	Predicted		This reaction was included to get rid of the ribose-1-phosphate buildup due to the rxn01138, but is unlikely to be essential in real cells presumably due to other fates of ribose-1-phosphate or the export of ribose-1-phosphate build up.		Smed_3345	deoB	deoB	deoB	deoB	drm	noHit	mll5587	noHit	noHit
rxn05289	Thioredoxin reductase	cpd11420_c0 (1) + cpd00067_c0 (1) + cpd00005_c0 (1) ==> cpd00006_c0 (1) + cpd11421_c0 (1)	trdox_c0 (1) + H_c0 (1) + NADPH_c0 (1) ==> NADP_c0 (1) + trdrd_c0 (1)	FALSE	R02016	1.8.1.9	(smc01224 and smc02761)	(TrxB and TrxA)	Experimental	This study			(Smed_1248 and Smed_3241)	(trxB3 and trxA)	(trxB3 and trxA)	(trxB and RL0025)	(trxBch and trxA1)	(trxB and trxA)	(RL73_04840 and RL73_00115)	(mll2552 and mll5082)	(trxB and trxA)	(trxB and trxA)
rxn00272	L-alanine--glyoxylate aminotransferase	cpd00040_c0 (1) + cpd00035_c0 (1) <==> cpd00020_c0 (1) + cpd00033_c0 (1)	Glyoxalate_c0 (1) + L_Alanine_c0 (1) <==> Pyruvate_c0 (1) + Glycine_c0 (1)	TRUE	R00369	2.6.1.44	sma1495	Sma1495	Predicted		Included for removal of glycine buildup by rxn00692, but is unlikely to be essential in real cells due to other fates of the glycine, such as export.		Smed_5312	noHit	noHit	noHit	RHE_PB00131	noHit	noHit	noHit	noHit	noHit
rxn10052	Adenylate kinase inorganic triphosphate	cpd00067_c0 (1) + cpd00018_c0 (1) + cpd00421_c0 (1) <==> cpd00012_c0 (1) + cpd00008_c0 (1)	H_c0 (1) + AMP_c0 (1) + Triphosphate_c0 (1) <==> PPi_c0 (1) + ADP_c0 (1)	TRUE		2.7.4.3	smc01288	Adk	Experimental	This study			Smed_1007	NGR_c12110	OV14_2433	adk1	adk	adk	RL73_02290	mlr0322	DK53_1195	bll5379
Sucrose catabolism
rxn00022s	Sucrose hydrolase	cpd00076_c0 (1) + cpd00001_c0 (1) ==> cpd00027_c0 (1) + cpd00082_c0 (1)	Sucrose_c0 (1) + H2O_c0 (1) ==> D_Glucose_c0 (1) + D_Fructose_c0 (1)	FALSE	R00801	3.2.1.48	(smc03064 or UnknownAB)	(AglA or UnknownAB)	Experimental but incomplete	Willis and Walker 1999	The aglA gene only appeared to be required for sucrose catabolism in the absence of pSymA and pSymB, suggesting a second enzyme encoded by these replicons can complement the mutation of aglA.		(Smed_0295 or UnknownAB)	(aglA1 or UnknownAB)	(aglA1 or UnknownAB)	(aglA1 or UnknownAB)	(aglA or UnknownAB)	(aglA or UnknownAB)	(noHit or UnknownAB)	(mll5109 or UnknownAB)	(noHit or UnknownAB)	(noHit or UnknownAB)
rxn00216	D-glucose 6-phosphotransferase	cpd00027_c0 (1) + cpd00002_c0 (1) <==> cpd00079_c0 (1) + cpd00008_c0 (1)	D_Glucose_c0 (1) + ATP_c0 (1) <==> D_glucose_6_phosphate_c0 (1) + ADP_c0 (1)	TRUE	R00299	2.7.1.1	smc02835	Glk	Experimental but incomplete		In this Tn-seq data, mutation of glk appeared to result in a fitness descrease that was exaggerated by the removal of pSymA and pSymB. This is consistent with the function of this gene. It could also suggest additional glucose kinase acitivy by a pSymA or pSymB encoded enzyme, but it may also simply reflect the use of glucose through other pathways, preventing its buildup (the fructose could stil…		Smed_3369	glk	glk	glk	glk	glk	RL73_03575	mlr4640	glk	blr4550
rxn00547	D-fructose 6-phosphotransferase	cpd00002_c0 (1) + cpd00082_c0 (1) <==> cpd00072_c0 (1) + cpd00008_c0 (1)	ATP_c0 (1) + D_Fructose_c0 (1) <==> D_fructose_6_phosphate_c0 (1) + ADP_c0 (1)	TRUE	R00760	2.7.1.1	smc02164	Frk	Experimental	This study			Smed_0108	NGR_c01160	OV14_1404	frk	frk	scrK	noHit	mll7580	DK53_128	blr3227
Core transport reactions
rxn05319	H2O (water) transport via diffusion	cpd00001_c0 (1) <==> cpd00001_e0 (1)	H2O_c0 (1) <==> H2O_e0 (1)	TRUE			Spontaneous	Spontaneous					Spontaneous	Spontaneous	Spontaneous	Spontaneous	Spontaneous	Spontaneous	Spontaneous	Spontaneous	Spontaneous	Spontaneous
rxn05467	CO2 (carbon dioxide) transport via diffusion	cpd00011_e0 (1) <==> cpd00011_c0 (1)	CO2_e0 (1) <==> CO2_c0 (1)	TRUE			Spontaneous	Spontaneous					Spontaneous	Spontaneous	Spontaneous	Spontaneous	Spontaneous	Spontaneous	Spontaneous	Spontaneous	Spontaneous	Spontaneous
rxn05468	O2 (oxygen) transport via diffusion	cpd00007_e0 (1) <==> cpd00007_c0 (1)	O2_e0 (1) <==> O2_c0 (1)	TRUE			Spontaneous	Spontaneous					Spontaneous	Spontaneous	Spontaneous	Spontaneous	Spontaneous	Spontaneous	Spontaneous	Spontaneous	Spontaneous	Spontaneous
rxnBLTPcpd00149	Co2 (cobalt) ABC transport	cpd00149_e0 (1) + cpd00002_c0 (1) + cpd00001_c0 (1) ==> cpd00149_c0 (1) + cpd00067_c0 (1) + cpd00009_c0 (1) + cpd00008_c0 (1)	Co2_e0 (1) + ATP_c0 (1) + H2O_c0 (1) ==> Co2_c0 (1) + H_c0 (1) + Phosphate_c0 (1) + ADP_c0 (1)	FALSE			((smb20056 and smb20057 and smb20058) or UnknownC)	((CbtJ and CbtK and CbtL) or UnknownC)	Experimental	Cheng et al 2011	At trace concentrations, this transporter is required for growth (Cheng et al 2011). However, it is dispensible when cobalt ion concentrations are elevated presumably due to transport via other low affinity mechanisms, with the CorA transporter being one possibility		((Smed_4081 and Smed_4080 and Smed_4079) or UnknownC)	((NGR_b02510 and NGR_b02520 and NGR_b02530) or UnknownC)	((noHit and OV14_3260 and noHit) or UnknownC)	((RL3052 and RL3051 and RL3050) or UnknownC)	((RHE_PF00269 and RHE_PF00270 and RHE_PF00271) or UnknownC)	((Atu3396 and Atu3395 and fecE) or UnknownC)	((noHit and RL73_03155 and RL73_03165) or UnknownC)	((noHit and mlr8229 and mlr8227) or UnknownC)	((DK53_2471 and DK53_2472 and DK53_2473) or UnknownC)	((noHit and noHit and noHit) or UnknownC)
rxn05312	PO4 (phosphate) transport via proton symport	cpd00067_e0 (1) + cpd00009_e0 (1) + cpd00254_e0 (0.5) + cpd00063_e0 (0.5) <==> cpd00067_c0 (1) + cpd00009_c0 (1) + cpd00254_c0 (0.5) + cpd00063_c0 (0.5)	H_e0 (1) + Phosphate_e0 (1) + Mg_e0 (0.5) + Ca2_e0 (0.5) <==> H_c0 (1) + Phosphate_c0 (1) + Mg_c0 (0.5) + Ca2_c0 (0.5)	TRUE			(smc02861 and smc02862)	(Pit and OrfA)	Experimental	Bardin et al 1998; Voegele et al 1997	While the Pit protein has indeed been experimentally shown to transport phosphate, an involvement of OrfA in this process has not been shown. However, they are co-transcribed as an operon, and so both have been included here. Pit mediated Pi import in E. coli is dependent on divalent cations and protons. Therefore, this reaction includes both Mg and Ca as divalent cations, but others could be use…		(Smed_3393 and Smed_3394)	(NGR_c35020 and NGR_c35010)	(OV14_1014 and OV14_1013)	(pit2 and pitX)	(pit and RHE_CH00947)	(noHit and Atu4634)	(noHit and noHit)	(mlr8370 and mlr8369)	(noHit and noHit)	(blr4043 and blr4042)
rxn05145	PO4 (phosphate) ABC transport	cpd00002_c0 (1) + cpd00001_c0 (1) + cpd00009_e0 (1) ==> cpd00067_c0 (1) + cpd00009_c0 (2) + cpd00008_c0 (1)	ATP_c0 (1) + H2O_c0 (1) + Phosphate_e0 (1) ==> H_c0 (1) + Phosphate_c0 (2) + ADP_c0 (1)	FALSE			((smc02146 and (smc02145 and smc02144) and smc02143 and smc02142 and (smc02141 or NonEssential)) or (smb21177 and smb21176 and smb21175 and smb21174))	((PstS and (PstC and PstC) and PstA and PstB and (PhoU or NonEssential)) or (PhnC and PnhD and PhnE and PhnT))	Experimental	Bardin et al 1996; Voegele et al 1997; Yuan et al 2006; diCenzo et al 2017	PstSCAB is a high affinity high velocity transporter, PhnCDET is high affinity low velocity. The pstC gene has a frameshift mutation in the Rm1021 strain, resulting in the annotation of two genes and this transporter haing low rates of activity in Rm1021. However, this mtuation is absent from the closely related strain Rm2011 and the parent strain RCR2011. The PhoU protein is not required for Pst…		((Smed_0119 and (noHit and Smed_0120) and Smed_0121 and Smed_0122 and (Smed_0123 or NonEssential)) or (Smed_4668 and Smed_4667 and Smed_4666 and Smed_4665))	((NGR_c01440 and (noHit and NGR_c01450) and NGR_c01460 and NGR_c01470 and (phoU or NonEssential)) or (phcN and NGR_b13330 and NGR_b13320 and NGR_b13310))	((OV14_1428 and (noHit and OV14_1429) and OV14_1430 and OV14_1431 and (phoU or NonEssential)) or (phcN and OV14_a0496 and OV14_a0495 and OV14_a0494))	((RL0542 and (noHit and RL0543) and RL0544 and RL0545 and (phoU or NonEssential)) or (phoC and phoD and phoE and phoT))	((pstS and (noHit and pstC) and pstA and pstB and (phoU or NonEssential)) or (RHE_CH00160 and RHE_CH00159 and RHE_CH00158 and RHE_CH00157))	((Atu0420 and (noHit and pstC) and pstA and pstB and (phoU or NonEssential)) or (phnC and phnD and phnE and phnE))	((RL73_06380 and (noHit and RL73_06375) and RL73_06370 and RL73_06365 and (RL73_06360 or NonEssential)) or (noHit and noHit and noHit and noHit))	((noHit and (noHit and mll3722) and noHit and mll3719 and (mlr5643 or NonEssential)) or (mlr3353 and mlr3355 and mlr3356 and noHit))	((DK53_2054 and (noHit and pstC) and pstA and pstB and (phoU or NonEssential)) or (noHit and noHit and noHit and noHit))	((noHit and (noHit and pstC) and noHit and pstB and (phoU or NonEssential)) or (phoC and phoD and phoE and noHit))
rxn05616	Mg (magnesium) transport via diffusion	cpd00254_c0 (1) <==> cpd00254_e0 (1)	Mg_c0 (1) <==> Mg_e0 (1)	TRUE			(smc00874 or smc00399 or smc01261)	(CorA2 or CorA1 or MgtE)	Predicted		The MgtE transporter is a magnesium transporter in R. leguminosarum (Hood et al 2015)		(Smed_0443 or noHit or Smed_1033)	(NGR_c04430 or corA or NGR_c12390)	(OV14_1763 or corA or OV14_2461)	(RL0921 or noHit or RL2551)	(corAch or noHit or RHE_CH02218)	(corA or noHit or mgtE)	(noHit or noHit or noHit)	(noHit or mlr2697 or mll1318)	(noHit or DK53_574 or mgtE)	(noHit or corA or bll5251)
rxn05514	Ca2 (calcium) transport via proton antiport	cpd00067_e0 (1) + cpd00063_c0 (1) <==> cpd00067_c0 (1) + cpd00063_e0 (1)	H_e0 (1) + Ca2_c0 (1) <==> H_c0 (1) + Ca2_e0 (1)	TRUE			(smc02224 or UnknownC)	(ChaA or UnknownC)	Predicted				(Smed_0140 or UnknownC)	(NGR_a03490 or UnknownC)	(OV14_1451 or UnknownC)	(cpaA or UnknownC)	(chaA or UnknownC)	(chaA or UnknownC)	(noHit or UnknownC)	(noHit or UnknownC)	(noHit or UnknownC)	(bll7121 or UnknownC)
rxn05149	Mn (manganese) ABC transport	cpd00002_c0 (1) + cpd00001_c0 (1) + cpd00030_e0 (1) ==> cpd00067_c0 (1) + cpd00009_c0 (1) + cpd00008_c0 (1) + cpd00030_c0 (1)	ATP_c0 (1) + H2O_c0 (1) + Mn2_e0 (1) ==> H_c0 (1) + Phosphate_c0 (1) + ADP_c0 (1) + Mn2_c0 (1)	FALSE			(smc02508 and smc02507 and smc02509 and smc02506)	(SitB and SitC and SitA and SitD)	Experimental	Platero et al 2003; Davies and Walker 2007b; This study			(Smed_2915 and Smed_2916 and Smed_2914 and Smed_2917)	(NGR_c31030 and NGR_c31040 and NGR_c31020 and NGR_c31050)	(OV14_0587 and OV14_0588 and OV14_0586 and OV14_0589)	(sitB and sitC and sitA and RL3887)	(RHE_CH00969 and noHit and RHE_CH00971 and RHE_CH00970)	(sitB and sitC and sitA and sitD)	(noHit and noHit and RL73_05155 and RL73_05170)	(mll8315 and noHit and mll8313 and noHit)	(noHit and noHit and noHit and noHit)	(bll7771 and noHit and bll7769 and noHit)
rxn05195b	Fe2 (iron) ABC transport	cpd10515_e0 (1) + cpd00002_c0 (1) + cpd00001_c0 (1) ==> cpd10515_c0 (1) + cpd00067_c0 (1) + cpd00009_c0 (1) + cpd00008_c0 (1)	Fe2_e0 (1) + ATP_c0 (1) + H2O_c0 (1) ==> Fe2_c0 (1) + H_c0 (1) + Phosphate_c0 (1) + ADP_c0 (1)	FALSE			((smc01611 and smc01657) and smc01659 and (smc01511 and smc01510) and smc01658)	((FhuA or FoxA) and FhuP and (HmuU and HmuV) and FhuF)	Experimental	Cuív et al 2008	This is a simplified reaction representing the acquisition of Fe2 from xenosiderophores		((Smed_2140 and Smed_2192) and Smed_2194 and (Smed_2340 and Smed_2341) and Smed_2193)	((noHit and NGR_c21740) and NGR_c21760 and (NGR_c24590 and NGR_c24600) and fhuF)	((OV14_a0178 and OV14_0715) and OV14_3702 and (OV14_3985 and OV14_3986) and fhuF)	((noHit and fhuA2) and RL2713 and (hmuU and hmuV) and fhuF)	((noHit and fhuA) and noHit and (hmuU and hmuV) and fhuF)	((Atu0409 and noHit) and noHit and (hmuU and hmuV) and noHit)	((noHit and noHit) and noHit and (noHit and noHit) and noHit)	((noHit and noHit) and noHit and (mll1150 and mll1149) and noHit)	((noHit and noHit) and noHit and (DK53_1321 and noHit) and noHit)	((bll4920 and noHit) and noHit and (hmuU and hmuV) and noHit)
rxn05195	Fe3 (iron) ABC transport	cpd10516_e0 (1) + cpd00002_c0 (1) + cpd00001_c0 (1) ==> cpd10516_c0 (1) + cpd00067_c0 (1) + cpd00009_c0 (1) + cpd00008_c0 (1)	fe3_e0 (1) + ATP_c0 (1) + H2O_c0 (1) ==> fe3_c0 (1) + H_c0 (1) + Phosphate_c0 (1) + ADP_c0 (1)	FALSE			((smc00784 and smc00775 and Unknown) or (smb20363 and smb20364 and smb20365))	((FbpA and FbpB and Unknown) or (Smb20363 and Smb20364 and Smb20365))	Experimental but incomplete	This study	The two chromosomal genes appeared to be essential only in the absence of pSymA and pSymB in this Tn-seq data. This suggests atleast one more iron transporter is present on one of these replicons, the most likely being the one included in this reaction		((Smed_0327 and Smed_0317 and Unknown) or (Smed_3754 and Smed_3753 and Smed_3752))	((NGR_c03440 and NGR_c03340 and Unknown) or (noHit and noHit and noHit))	((OV14_1649 and OV14_1638 and Unknown) or (OV14_a0239 and OV14_a0240 and OV14_a0241))	((noHit and noHit and Unknown) or (noHit and noHit and noHit))	((noHit and noHit and Unknown) or (afuC1 and afuB1 and afuA1))	((Atu0202 and Atu0613 and Unknown) or (afuC and afuB and afuA))	((noHit and noHit and Unknown) or (noHit and noHit and noHit))	((noHit and noHit and Unknown) or (noHit and noHit and noHit))	((DK53_2522 and DK53_2523 and Unknown) or (DK53_2503 and DK53_2502 and DK53_2501))	((noHit and noHit and Unknown) or (noHit and noHit and noHit))
rxn05150	Zn2 (zinc) ABC transport	cpd00002_c0 (1) + cpd00001_c0 (1) + cpd00034_e0 (1) ==> cpd00067_c0 (1) + cpd00009_c0 (1) + cpd00008_c0 (1) + cpd00034_c0 (1)	ATP_c0 (1) + H2O_c0 (1) + Zn2_e0 (1) ==> H_c0 (1) + Phosphate_c0 (1) + ADP_c0 (1) + Zn2_c0 (1)	FALSE			((smc04244 and smc04245 and smc04243) or UnknownC)	((ZnuC and ZnuA and ZnuB) or UnknownC)	Experimental but incomplete	Vahling-Armstrong et al 2012	An unknown was included as the Znu transporter is only required for growth at low zinc concentrations, suggesting another system is capable of transporting zinc at high zinc concentrations.		((Smed_1696 and Smed_1697 and Smed_1695) or UnknownC)	((NGR_c17640 and znuA and NGR_c17630) or UnknownC)	((OV14_3132 and znuA and OV14_3131) or UnknownC)	((znuC and znuA and znuB) or UnknownC)	((znuC and znuA and znuB) or UnknownC)	((znuC and znuA and znuB) or UnknownC)	((noHit and noHit and noHit) or UnknownC)	((noHit and noHit and noHit) or UnknownC)	((DK53_2118 and DK53_2119 and DK53_2117) or UnknownC)	((noHit and noHit and noHit) or UnknownC)
rxn08769	K (potassium) transport via proton symport	cpd00067_e0 (1) + cpd00205_e0 (1) <==> cpd00067_c0 (1) + cpd00205_c0 (1)	H_e0 (1) + K_e0 (1) <==> H_c0 (1) + K_c0 (1)	TRUE			((smc00937 and smc01046) or smc00873)	((TrkH and TrkA) or Kup1)	Experimental	Domínguez-Ferreras et al 2009	There are additional K transporters in S. meliloti, but at least one of the two mentioned here are required for growth in lab conditions.		((Smed_1374 and Smed_1093) or Smed_0444)	((noHit and noHit) or NGR_c04440)	((noHit and noHit) or OV14_1764)	((noHit and noHit) or kup1)	((noHit and noHit) or kupch1)	((trkH and trkA) or Atu0711)	((noHit and noHit) or trkD)	((noHit and noHit) or mll1417)	((DK53_1462 and DK53_1105) or kup)	((noHit and noHit) or blr3802)
rxn05209	Na (sodium) transport via proton antiport	cpd00067_c0 (1) + cpd00971_e0 (1) <==> cpd00067_e0 (1) + cpd00971_c0 (1)	H_c0 (1) + Na_e0 (1) <==> H_e0 (1) + Na_c0 (1)	TRUE			(smc00051 and smc00052 and smc00053 and smc00054 and smc00055 and smc00056 and smc00057)	(PhaA2 and PhaB2 and PhaC2 and PhaD2 and PhaE2 and PhaF2 and PhaG2)	Experimental but incomplete	This study	This transporter appeared essential in this Tn-seq data, and so it has been included here as the only potential sodium transporter. But this may be inaccurate, and the essentiality of this transporter may be due to a separate function. The PhaE1 and PhaF1 proteins appeared largely non-essential in the Tn-seq data, and so we have added a NonEssential with these genes. However, it is also possible …		(Smed_0607 and Smed_0608 and Smed_0609 and Smed_0610 and Smed_0611 and Smed_0612 and Smed_0613)	(NGR_c07500 and NGR_c07510 and NGR_c07520 and NGR_c07530 and NGR_c07540 and NGR_c07550 and NGR_c07560)	(OV14_2006 and OV14_2007 and OV14_2008 and OV14_2009 and OV14_2010 and OV14_2011 and OV14_2012)	(RL1372 and mrpB and mrpC and mrpD and mrpE and mrpF and mrpG)	(noHit and noHit and noHit and noHit and noHit and noHit and noHit)	(mnhA and mnhB and mnhC and mnhD and mnhE and mnhF and mnhG)	(noHit and noHit and noHit and noHit and noHit and noHit and noHit)	(noHit and noHit and noHit and noHit and noHit and noHit and noHit)	(noHit and noHit and noHit and noHit and noHit and noHit and noHit)	(noHit and noHit and noHit and noHit and blr7315 and noHit and noHit)
rxn05223	Biotin ABC transport	cpd00002_c0 (1) + cpd00001_c0 (1) + cpd00104_e0 (1) ==> cpd00067_c0 (1) + cpd00009_c0 (1) + cpd00104_c0 (1) + cpd00008_c0 (1)	ATP_c0 (1) + H2O_c0 (1) + BIOT_e0 (1) ==> H_c0 (1) + Phosphate_c0 (1) + Biotin_c0 (1) + ADP_c0 (1)	FALSE			(smc00964 and smc00963 and smc00962)	(BioY and BioN and BioM)	Experimental	Entcheva et al 2002; Guillén-Navarro et al 2005			(Smed_0501 and Smed_0502 and Smed_0503)	(bioY and bioN and bioM)	(bioY and bioN and bioM)	(bioY and RL1003 and RL1004)	(bioY and bioN and bioM)	(bioY and Atu0750 and Atu0751)	(noHit and noHit and noHit)	(noHit and noHit and noHit)	(DK53_1665 and noHit and DK53_1341)	(blr4297 and noHit and noHit)
rxn05466	NH3 (ammonia) transport via diffusion	cpd00013_e0 (1) <==> cpd00013_c0 (1)	NH3_e0 (1) <==> NH3_c0 (1)	TRUE			smc03807	AmtB	Predicted				Smed_3051	NGR_c31490	OV14_0709	amtB	amtB	amtB	noHit	mll4246	amt	amtB
rxn05153	SO4 (sulfate) ABC transport	cpd00002_c0 (1) + cpd00048_e0 (1) + cpd00001_c0 (1) ==> cpd00067_c0 (1) + cpd00048_c0 (1) + cpd00009_c0 (1) + cpd00008_c0 (1)	ATP_c0 (1) + Sulfate_e0 (1) + H2O_c0 (1) ==> H_c0 (1) + Sulfate_c0 (1) + Phosphate_c0 (1) + ADP_c0 (1)	FALSE			(smb21132 and (smb21130 or sma2067) and (sma2069 or smb21133) and smb21131)	(Smb21132 and (CysA1 or CysA1) and (CysP1 or CysP2) and Smb21131)	Predicted				(Smed_4543 and (Smed_4541 or noHit) and (noHit or Smed_4544) and Smed_4542)	(NGR_b11710 and (NGR_b11690 or noHit) and (NGR_b14530 or NGR_b11720) and NGR_b11700)	(OV14_a0282 and (noHit or OV14_a0845) and (noHit or OV14_a0283) and OV14_a0281)	(pRL110373 and (pRL110371 or noHit) and (noHit or pRL110374) and pRL110372)	(RHE_PE00258 and (RHE_PE00256 or noHit) and (noHit or RHE_PE00259) and RHE_PE00257)	(cysT and (Atu0823 or noHit) and (noHit or Atu0820) and Atu0822)	(noHit and (noHit or noHit) and (noHit or noHit) and noHit)	(mlr1667 and (mlr1669 or noHit) and (noHit or mlr1666) and mlr1668)	(cysT and (cysA or noHit) and (noHit or DK53_120) and cysW)	(blr1483 and (noHit or blr1485) and (noHit or blr1482) and blr1484)
rxn05651	SO4 (sulfate) transport via proton symport	cpd00067_e0 (1) + cpd00048_e0 (1) <==> cpd00067_c0 (1) + cpd00048_c0 (1)	H_e0 (1) + Sulfate_e0 (1) <==> H_c0 (1) + Sulfate_c0 (1)	TRUE			(smc00476 or smb20070 or UnknownC)	(SulP or Smb20070 or UnknownC)	Predicted				(Smed_5404 or Smed_4067 or UnknownC)	(NGR_c16450 or noHit or UnknownC)	(OV14_b0762 or OV14_b0225 or UnknownC)	(noHit or RL2944 or UnknownC)	(RHE_CH01065 or noHit or UnknownC)	(noHit or Atu1156 or UnknownC)	(noHit or noHit or UnknownC)	(mlr4576 or noHit or UnknownC)	(noHit or noHit or UnknownC)	(noHit or noHit or UnknownC)
rxnBLTPcpd00076	Sucrose ABC transport	cpd00076_e0 (1) + cpd00002_c0 (1) + cpd00001_c0 (1) ==> cpd00076_c0 (1) + cpd00067_c0 (1) + cpd00009_c0 (1) + cpd00008_c0 (1)	Sucrose_e0 (1) + ATP_c0 (1) + H2O_c0 (1) ==> Sucrose_c0 (1) + H_c0 (1) + Phosphate_c0 (1) + ADP_c0 (1)	FALSE			((smb20325 and smb20326 and smb20327 and smb20328) or (smc03061 and smc03062 and smc03063 and smc03065))	((ThuE and ThuF and ThuG and ThuK) or (AglE and AglF and AglG and AglK))	Experimental	Willis and Walker 1999; Jensen et al 2002; diCenzo and Finan 2015			((smb20325 and Smed_3811 and Smed_3810 and Smed_3809) or (Smed_0292 and Smed_0293 and Smed_0294 and Smed_0296))	((smb20325 and thuF and thuG and thuK) or (NGR_c03100 and NGR_c03110 and NGR_c03120 and NGR_c03140))	((smb20325 and thuF and thuG and thuK) or (OV14_1608 and OV14_1610 and OV14_1611 and OV14_1613))	((smb20325 and thuF and thuG and thuK) or (aglE and aglF and aglG and aglK))	((smb20325 and thuF and thuG and thuK) or (aglE and aglF and aglG and aglK))	((smb20325 and thuF and thuG and thuK) or (aglE and aglF and aglG and aglK))	((smb20325 and noHit and noHit and noHit) or (noHit and noHit and noHit and noHit))	((smb20325 and noHit and mlr7227 and noHit) or (mll5113 and mll5112 and mll5110 and mll5107))	((smb20325 and DK53_2849 and DK53_2848 and DK53_2847) or (noHit and noHit and noHit and noHit))	((smb20325 and noHit and noHit and noHit) or (noHit and noHit and noHit and noHit))
rxn05147	D-glucose ABC transport	cpd00027_e0 (1) + cpd00002_c0 (1) + cpd00001_c0 (1) ==> cpd00027_c0 (1) + cpd00067_c0 (1) + cpd00009_c0 (1) + cpd00008_c0 (1)	D_Glucose_e0 (1) + ATP_c0 (1) + H2O_c0 (1) ==> D_Glucose_c0 (1) + H_c0 (1) + Phosphate_c0 (1) + ADP_c0 (1)	FALSE			((sma0203 and sma0199 and sma0198 and sma0197) or (smb20902 and smb20903 and smb20904) or Unknown)	((Sma0203 and Sma0199 and Sma0198 and Sma0197) or (Smb20902 and Smb20903 and Smb20904) or Unknown)	Experimental but incomplete	Mauchline et al 2006	The way through which glucose enters the cell is not well known in S. meliloti, but it is likely that many transporters contribute to this process. For this model, we have included only the two transports induced by glucose as observed by Mauchline et al (2006), and an unknown as there are presumably others.		((Smed_5320 and Smed_5319 and Smed_5318 and Smed_5317) or (Smed_4467 and Smed_4466 and Smed_4465) or Unknown)	((noHit and noHit and noHit and noHit) or (xylF and xylH and NGR_c24240) or Unknown)	((noHit and noHit and noHit and noHit) or (xylF and xylH and OV14_3946) or Unknown)	((pRL120284 and pRL120285 and pRL120286 and pRL120287) or (RL3624 and RL3625 and RL3626) or Unknown)	((RHE_PF00481 and RHE_PF00482 and RHE_PF00483 and RHE_PF00484) or (xylF and xylH and xylG) or Unknown)	((Atu4033 and Atu4032 and Atu4031 and Atu4030) or (xylF and xylH and xylG) or Unknown)	((noHit and noHit and noHit and noHit) or (noHit and noHit and noHit) or Unknown)	((mll4204 and mll4203 and mll4202 and mll4201) or (mll3713 and mll3711 and mll3710) or Unknown)	((noHit and noHit and noHit and noHit) or (xylF and noHit and noHit) or Unknown)	((noHit and noHit and noHit and noHit) or (noHit and noHit and noHit) or Unknown)
rxn09269	Succinate transport via proton symport (2 H)	cpd00067_e0 (2) + cpd00036_e0 (1) <==> cpd00067_c0 (2) + cpd00036_c0 (1)	H_e0 (2) + Succinate_e0 (1) <==> H_c0 (2) + Succinate_c0 (1)	TRUE			smb20611	DctA	Experimental	Engelke et al 1989; Yurgel and Kahn 2005			Smed_4178	dctA2	dctA2	dctA	dctA	dctA	RL73_02010	mll7237	noHit	dctA
Core exchange reactions
EX_cpd00001_e0	EX_H2O (water)_e0	cpd00001_e0 (1) <==> cpd00001_b (1)	H2O_e0 (1) <==> H2O_b (1)	TRUE
EX_cpd00067_e0	EX_H (proton)_e0	cpd00067_e0 (1) <==> cpd00067_b (1)	H_e0 (1) <==> H_b (1)	TRUE
EX_cpd00011_e0	EX_CO2 (carbon dioxide)_e0	cpd00011_e0 (1) <==> cpd00011_b (1)	CO2_e0 (1) <==> CO2_b (1)	TRUE
EX_cpd00007_e0	EX_O2 (oxygen)_e0	cpd00007_e0 (1) <==> cpd00007_b (1)	O2_e0 (1) <==> O2_b (1)	TRUE
EX_cpd00149_e0	EX_Co2 (cobalt)_e0	cpd00149_e0 (1) <==> cpd00149_b (1)	Co2_e0 (1) <==> Co2_b (1)	TRUE
EX_cpd00009_e0	EX_PO4 (phosphate_e0	cpd00009_e0 (1) <==> cpd00009_b (1)	Phosphate_e0 (1) <==> Phosphate_b (1)	TRUE
EX_cpd00254_e0	EX_Mg (magnesium)_e0	cpd00254_e0 (1) <==> cpd00254_b (1)	Mg_e0 (1) <==> Mg_b (1)	TRUE
EX_cpd00063_e0	EX_Ca2 (calcium)_e0	cpd00063_e0 (1) <==> cpd00063_b (1)	Ca2_e0 (1) <==> Ca2_b (1)	TRUE
EX_cpd00030_e0	EX_Mn2 (manganese)_e0	cpd00030_e0 (1) <==> cpd00030_b (1)	Mn2_e0 (1) <==> Mn2_b (1)	TRUE
EX_cpd10515_e0	EX_Fe2 (iron)_e0	cpd10515_e0 (1) <==> cpd10515_b (1)	Fe2_e0 (1) <==> Fe2_b (1)	TRUE
EX_cpd10516_e0	EX_Fe3 (iron)_e0	cpd10516_e0 (1) <==> cpd10516_b (1)	fe3_e0 (1) <==> fe3_b (1)	TRUE
EX_cpd00034_e0	EX_Zn2 (zinc)_e0	cpd00034_e0 (1) <==> cpd00034_b (1)	Zn2_e0 (1) <==> Zn2_b (1)	TRUE
EX_cpd00205_e0	EX_K (potassium)_e0	cpd00205_e0 (1) <==> cpd00205_b (1)	K_e0 (1) <==> K_b (1)	TRUE
EX_cpd00971_e0	EX_Na (sodium)_e0	cpd00971_e0 (1) <==> cpd00971_b (1)	Na_e0 (1) <==> Na_b (1)	TRUE
EX_cpd00104_e0	EX_Biotin_e0	cpd00104_e0 (1) <==> cpd00104_b (1)	BIOT_e0 (1) <==> BIOT_b (1)	TRUE
EX_cpd00013_e0	EX_NH3 (ammonia)_e0	cpd00013_e0 (1) <==> cpd00013_b (1)	NH3_e0 (1) <==> NH3_b (1)	TRUE
EX_cpd00048_e0	EX_SO4 (sulfate)_e0	cpd00048_e0 (1) <==> cpd00048_b (1)	Sulfate_e0 (1) <==> Sulfate_b (1)	TRUE
EX_cpd00076_e0	EX_Sucrose_e0	cpd00076_e0 (1) <==> cpd00076_b (1)	Sucrose_e0 (1) <==> Sucrose_b (1)	TRUE
EX_cpd00027_e0	EX_D-glucose_e0	cpd00027_e0 (1) <==> cpd00027_b (1)	D_Glucose_e0 (1) <==> D_Glucose_b (1)	TRUE
EX_cpd00036_e0	EX_Succinate_e0	cpd00036_e0 (1) <==> cpd00036_b (1)	Succinate_e0 (1) <==> Succinate_b (1)	TRUE
Biomass reaction
rxnBIOMASS	Biomass reaction	cpd11461_c0 (0.000906123) + cpd11613_c0 (0.002296623) + cpd11463_c0 (0.000454581) + cpdPG_c0 (0.00012898522) + cpdCL_c0 (0.00002725291) + cpdPE_c0 (0.00023524530) + cpdMMPE_c0 (0.0002) + cpdPC_c0 (0.00097369284) + cpdSL_c0 (0.00003307313) + cpdOL_c0 (0.00003377804) + cpd00155_c0 (0.024670038) + cpd12836_c0 (1.022193208) + cpd15665_c0 (0.017750942) + cpdLPS_c0 (0.007185334) + cpdEPSLn_c0 (0.024918…	DNA (0.000906123) + RNA (0.002296623) + protein (0.000454581) + Total PG lipids_c0 (0.00012898522) + Total CL lipids_c0 (0.00002725291) + Total PE lipids_c0 (0.00023524530) + Total MMPE lipids_c0 (0.0002) + Total PC lipids_c0 (0.00097369284) + Total SL lipids_c0 (0.00003307313) + Total OL lipids_c0 (0.00003377804) + Glycogen_c0 (0.024670038) + poly-beta-hydroxybutyrate (1.022193208) + Peptidoglyc…	FALSE			(smc01874 and smc01865 and smc01873 and smc00811 and (smc01872 or NonEssential) and smc01860 and smc04459 and smc00654 and smc02792)	(FtsZ1 and FtsW and FtsA and FtsJ and (FtsQ or NonEssential) and FtsI and FtsH and CtrA and Maf)			Genes included in this biomass reaction are related to cell division.		(Smed_2074 and Smed_2083 and Smed_2075 and Smed_0373 and (Smed_2076 or NonEssential) and Smed_2088 and Smed_2623 and Smed_2605 and Smed_3210)	(ftsZ1 and ftsW and ftsA and ftsJ and (ftsQ or NonEssential) and ftsI and ftsH and NGR_c27580 and NGR_c33510)	(ftsZ1 and ftsW and ftsA and ftsJ and (ftsQ or NonEssential) and ftsI and ftsH and OV14_0189 and OV14_0878)	(ftsZ1 and ftsW and ftsA and RL0843 and (ftsQ or NonEssential) and RL3313 and hflB and RL3758 and RL0002)	(ftsZ2 and ftsW and ftsA and ftsJ and (ftsQ or NonEssential) and ftsI and ftsH and ctrA and RHE_CH00002)	(ftsZ2 and ftsW and ftsA and ftsJ and (ftsQ or NonEssential) and pbpB1 and ftsH and ctrA and maf)	(noHit and RL73_03640 and RL73_03100 and RL73_05380 and (RL73_03095 or NonEssential) and RL73_03665 and RL73_01930 and RL73_05245 and RL73_00165)	(mll1546 and mll1555 and mll1549 and mlr8347 and (mll1550 or NonEssential) and mll1561 and mll3882 and mll2816 and mlr4491)	(ftsZ and ftsW and ftsA and DK53_2535 and (DK53_1394 or NonEssential) and DK53_1404 and hflB and ctrA and maf)	(noHit and ftsW and ftsA and ftsJ and (bll6598 or NonEssential) and bll6608 and ftsH and bll2200 and blr0638)
EX_cpd11416_e0	EX_Biomass_c0	cpd11416_c0 (1) ==> cpd11416_b (1)	Biomass_c0 (1) ==> Biomass_b (1)	FALSE

## Sheet: Metabolites
CpdID	CpdName	Compartment	Charge	BoundaryCondition
cpd00001_b	H2O_b	e0	0	TRUE
cpd00001_c0	H2O_c0	c0	0	FALSE
cpd00001_e0	H2O_e0	e0	0	FALSE
cpd00002_c0	ATP_c0	c0	-3	FALSE
cpd00003_c0	NAD_c0	c0	-1	FALSE
cpd00004_c0	NADH_c0	c0	-2	FALSE
cpd00005_c0	NADPH_c0	c0	-3	FALSE
cpd00006_c0	NADP_c0	c0	-2	FALSE
cpd00007_b	O2_b	e0	0	TRUE
cpd00007_c0	O2_c0	c0	0	FALSE
cpd00007_e0	O2_e0	e0	0	FALSE
cpd00008_c0	ADP_c0	c0	-2	FALSE
cpd00009_b	Phosphate_b	e0	-2	TRUE
cpd00009_c0	Phosphate_c0	c0	-2	FALSE
cpd00009_e0	Phosphate_e0	e0	-2	FALSE
cpd00010_c0	CoA_c0	c0	-3	FALSE
cpd00011_b	CO2_b	e0	0	TRUE
cpd00011_c0	CO2_c0	c0	0	FALSE
cpd00011_e0	CO2_e0	e0	0	FALSE
cpd00012_c0	PPi_c0	c0	-2	FALSE
cpd00013_b	NH3_b	e0	1	TRUE
cpd00013_c0	NH3_c0	c0	1	FALSE
cpd00013_e0	NH3_e0	e0	1	FALSE
cpd00014_c0	UDP_c0	c0	-2	FALSE
cpd00015_c0	FAD_c0	c0	-2	FALSE
cpd00016_c0	Pyridoxal_phosphate_c0	c0	-1	FALSE
cpd00017_c0	S_Adenosyl_L_methionine_c0	c0	1	FALSE
cpd00018_c0	AMP_c0	c0	-1	FALSE
cpd00019_c0	S_Adenosyl_homocysteine_c0	c0	0	FALSE
cpd00020_c0	Pyruvate_c0	c0	-1	FALSE
cpd00022_c0	Acetyl_CoA_c0	c0	-3	FALSE
cpd00023_c0	L_Glutamate_c0	c0	-1	FALSE
cpd00024_c0	2_Oxoglutarate_c0	c0	-2	FALSE
cpd00025_c0	H2O2_c0	c0	0	FALSE
cpd00026_c0	UDP_glucose_c0	c0	-2	FALSE
cpd00027_b	D_Glucose_b	e0	0	TRUE
cpd00027_c0	D_Glucose_c0	c0	0	FALSE
cpd00027_e0	D_Glucose_e0	e0	0	FALSE
cpd00028_c0	Heme_c0	c0	-2	FALSE
cpd00029_c0	Acetate_c0	c0	-1	FALSE
cpd00030_b	Mn2_b	e0	2	TRUE
cpd00030_c0	Mn2_c0	c0	2	FALSE
cpd00030_e0	Mn2_e0	e0	2	FALSE
cpd00031_c0	GDP_c0	c0	-2	FALSE
[truncated: 681 more rows]
